# Supplementary material for: Ruthenium-catalyzed cascade C–H activation/annulation of N-alkoxybenzamides: reaction development and mechanistic insight
Source: Royal Society of Chemistry journal article supplement (doi:10.1039/d0sc04434b), 2020-01-01
Supplement: d0sc04434b1.pdf [file d0sc04434b1.pdf]

# Supporting Information

## Ruthenium-Catalyzed Cascade C-H Activation/Annulation of *N*-Alkoxybenzamides: Reaction Development and Mechanistic Insight

Liangliang Song,<sup>a</sup> Xiaoyong Zhang,<sup>b</sup> Xiao Tang,<sup>c</sup> Luc Van Meervelt,<sup>d</sup>  
Johan Van der Eycken,<sup>e</sup> Jeremy N. Harvey\*<sup>b</sup> and Erik V. Van der  
Eycken\*<sup>af</sup>

<sup>a</sup>Laboratory for Organic & Microwave-Assisted Chemistry (LOMAC), Department of Chemistry,  
KU Leuven, Celestijnenlaan 200 F, 3001 Leuven, Belgium.

<sup>b</sup>Theoretical and Computational Chemistry, Department of Chemistry, KU Leuven  
Celestijnenlaan 200F, 3001, Leuven, Belgium.

<sup>c</sup>School of Chemistry, Physics and Mechanical Engineering, Queensland University of  
Technology, Gardens Point Campus, Brisbane, QLD 4001, Australia.

<sup>d</sup>Biomolecular Architecture, Department of Chemistry, KU Leuven, Celestijnenlaan 200F, 3001  
Leuven, Belgium.

<sup>e</sup>Laboratory for Organic and Bio-Organic Synthesis, Department of Organic and Macromolecular  
Chemistry, Ghent University, Krijgslaan 281 (S.4), B-9000 Ghent, Belgium.

<sup>f</sup>Peoples' Friendship University of Russia (RUDN University), Miklukho-Maklaya Street 6,  
Moscow, 117198, Russia.

---

## Contents

|                                                            |      |
|------------------------------------------------------------|------|
| 1. General Information .....                               | S3   |
| 2. Synthesis of the Substrates .....                       | S3   |
| 3. Ruthenium-Catalyzed Annulations .....                   | S21  |
| 4. Additional Experiments .....                            | S41  |
| 5. Single Crystal X-Ray Diffraction .....                  | S46  |
| 6. DFT Calculation Details .....                           | S48  |
| 7. References .....                                        | S72  |
| 8. NMR Spectra .....                                       | S74  |
| 9. Cartesian Coordinates of DFT Optimized Structures ..... | S140 |

## 1. General Information

Commercially available reagents were used without additional purification. Column chromatography was performed with silica gel (70-230 mesh).  $^1\text{H}$  and  $^{13}\text{C}$  NMR spectra were recorded on a Bruker AM (300 or 400 MHz) spectrometer at ambient temperature using  $\text{CDCl}_3$  or  $\text{DMSO-d}_6$  as solvent. HRMS (ESI) spectrometry data were acquired on a quadrupole orthogonal acceleration time-of-flight mass spectrometer [Synapt G2 high definition mass spectrometer (HDMS), Waters, Milford, MA]. Samples were infused at  $3 \mu\text{L min}^{-1}$ , and spectra were obtained in the positive ionization mode with a resolution of 15000 [full width at half maximum (FWHM)] with leucine enkephalin as lock mass. Melting points were recorded on a Reichert Thermovar apparatus and are uncorrected. IR spectra were recorded on Bruker Alpha FT-IR spectrometer.

## 2. Synthesis of the Substrates

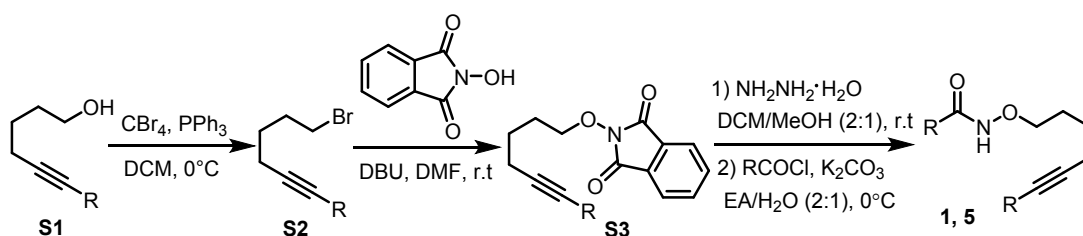

To a stirring solution of  $\text{CBr}_4$  (7.2 mmol) in  $\text{DCM}$  (12 mL), a solution of alcohol **S1** (4.0 mmol) in  $\text{DCM}$  was added to the resulting mixture at  $0^\circ\text{C}$ .<sup>1</sup> After stirring for another 5 minutes, a solution of  $\text{PPh}_3$  (8.0 mmol) in  $\text{DCM}$  was added dropwise at  $0^\circ\text{C}$ . The contents were then stirred at  $0^\circ\text{C}$  for 1 h (judging by TLC analysis). The solution was concentrated *in vacuo*. The obtained crude product was purified by flash column chromatography on silica gel (*n*-heptane/ethyl acetate from 50:1 to 10:1) to give the desired product **S2**.

To a stirred mixture of *N*-hydroxyphthalimide (3.0 mmol) and **S2** (3.3 mmol) in  $\text{DMF}$  (6 mL) was added  $\text{DBU}$  (3.6 mmol) slowly at ambient temperature.<sup>2</sup> The contents were then stirred for 1 h (judging by TLC

---

analysis). The reaction mixture was extracted twice with DCM. The solvent from the combined organic layers were dried over  $\text{Na}_2\text{SO}_4$ , filtered, and removed under reduced pressure. The residue was purified by flash column chromatography on silica gel (*n*-heptane/ethyl acetate from 6:1 to 2:1) to give the product afford **S3**.

In a 100 mL round-bottom flask was charged **S3** (3.0 mmol),<sup>3</sup> solvent 15 mL [MeOH/DCM (1:2)], and then slowly added hydrazine monohydrate (3.3 mmol), then stirred at room temperature for 4 h. Upon completion (indicated by TLC), the solvent was then removed under reduce pressure. The residue was washed with DCM and filtered, collected the DCM part and removed the solvent to give the crude *O*-alkoxylamine, which was used in next step without further purification.

The crude *O*-alkoxylamine which was obtained in the previous step was added to a biphasic mixture of  $\text{K}_2\text{CO}_3$  (3.6 mmol) in solvent 15 mL [EA/ $\text{H}_2\text{O}$  (2:1)].<sup>3</sup> The resulting solution was cooled to 0 °C followed by dropwise addition of the acid chloride (3.3 mmol) dissolved in a minimum amount of EtOAc. The reaction was allowed to stir at same temperature for 6 h. Upon completion (indicated by TLC), the phases were separated and the aqueous phase was extracted twice with EtOAc. The combined organic layers were dried over  $\text{Na}_2\text{SO}_4$ , filtered, and evaporated under reduced pressure. The residue was purified by flash column chromatography on silica gel (*n*-heptane/ethyl acetate from 4:1 to 1:1) to give the product **1, 5**.

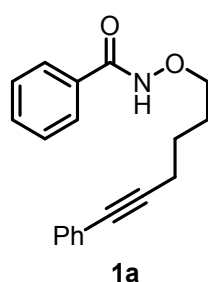

**1a** was obtained as a yellow oil.

$^1\text{H}$  NMR (300 MHz,  $\text{CDCl}_3$ )  $\delta$  9.22 (s, 1H), 7.79 – 7.68 (m, 2H), 7.50 (t,  $J$  = 7.3 Hz, 1H), 7.44 – 7.34 (m, 4H), 7.32 – 7.23 (m, 3H), 4.09 (t,  $J$  = 6.3 Hz, 2H), 2.49 (t,  $J$  = 6.8 Hz, 2H), 1.97 – 1.84 (m, 2H), 1.79 – 1.67 (m, 2H).

---

$^{13}\text{C}$  NMR (151 MHz,  $\text{CDCl}_3$ )  $\delta$  131.8, 131.5, 128.6, 128.2, 127.6, 127.0, 123.8, 89.7, 81.1, 76.2, 27.1, 25.0, 19.1.

IR (ATR-neat)  $\nu$  ( $\text{cm}^{-1}$ ) 3192, 2946, 1645, 1578, 1516, 1488, 1309, 1041, 1022, 755, 690.

HRMS (ESI,  $m/z$ ) calcd for  $\text{C}_{19}\text{H}_{20}\text{NO}_2$  ( $\text{M}+\text{H}$ ) $^+$ : 294.1488, found: 294.1498.

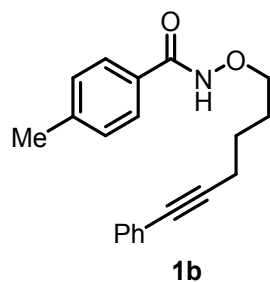

**1b** was obtained as a yellow oil.

$^1\text{H}$  NMR (300 MHz,  $\text{CDCl}_3$ )  $\delta$  9.21 (s, 1H), 7.64 (d,  $J = 7.9$  Hz, 2H), 7.42 – 7.33 (m, 2H), 7.28 (dd,  $J = 4.1, 2.5$  Hz, 3H), 7.18 (d,  $J = 7.9$  Hz, 2H), 4.08 (t,  $J = 6.3$  Hz, 2H), 2.48 (t,  $J = 6.8$  Hz, 2H), 2.38 (s, 3H), 1.94 – 1.84 (m, 2H), 1.79 – 1.66 (m, 2H).

$^{13}\text{C}$  NMR (101 MHz,  $\text{CDCl}_3$ )  $\delta$  166.6, 142.4, 131.5, 129.2, 129.0, 128.1, 127.5, 127.0, 123.8, 89.7, 81.0, 76.2, 27.0, 25.0, 21.4, 19.0.

IR (ATR-neat)  $\nu$  ( $\text{cm}^{-1}$ ) 3207, 2948, 1644, 1489, 1154, 1034, 1018, 754, 691.

HRMS (ESI,  $m/z$ ) calcd for  $\text{C}_{20}\text{H}_{22}\text{NO}_2$  ( $\text{M}+\text{H}$ ) $^+$ : 308.1645, found: 308.1639.

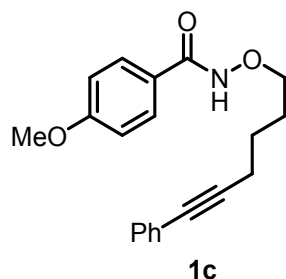

**1c** was obtained as a yellow oil.

---

$^1\text{H}$  NMR (300 MHz,  $\text{CDCl}_3$ )  $\delta$  9.10 (s, 1H), 7.76 – 7.66 (m, 2H), 7.39 (dd,  $J$  = 6.6, 3.0 Hz, 2H), 7.30 – 7.26 (m, 3H), 6.93 – 6.79 (m, 2H), 4.07 (t,  $J$  = 6.3 Hz, 2H), 3.82 (s, 3H), 2.49 (t,  $J$  = 6.8 Hz, 2H), 1.90 – 1.78 (m, 2H), 1.76 – 1.64 (m, 2H).

$^{13}\text{C}$  NMR (101 MHz,  $\text{CDCl}_3$ )  $\delta$  166.2, 162.3, 131.4, 128.9, 128.1, 127.5, 124.0, 123.7, 113.6, 89.7, 80.9, 76.0, 55.2, 27.0, 25.0, 19.0.

IR (ATR-neat)  $\nu$  ( $\text{cm}^{-1}$ ) 3193, 2938, 1638, 1605, 1489, 1253, 1152, 1024, 841, 756, 691.

HRMS (ESI,  $m/z$ ) calcd for  $\text{C}_{20}\text{H}_{22}\text{NO}_3$  ( $\text{M}+\text{H}$ ) $^+$ : 324.1594, found: 324.1580.

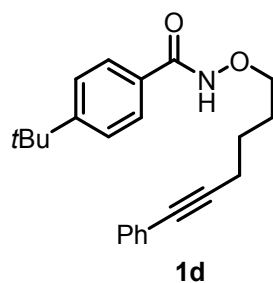

**1d** was obtained as a yellow oil.

$^1\text{H}$  NMR (400 MHz,  $\text{CDCl}_3$ )  $\delta$  9.28 (s, 1H), 7.67 (d,  $J$  = 8.1 Hz, 2H), 7.36 (d,  $J$  = 8.1 Hz, 4H), 7.25 (d,  $J$  = 5.8 Hz, 3H), 4.06 (t,  $J$  = 6.2 Hz, 2H), 2.46 (t,  $J$  = 6.9 Hz, 2H), 1.93 – 1.80 (m, 2H), 1.79 – 1.66 (m, 2H), 1.29 (s, 9H).

$^{13}\text{C}$  NMR (101 MHz,  $\text{CDCl}_3$ )  $\delta$  166.4, 155.4, 131.5, 129.0, 128.1, 127.5, 126.9, 125.5, 123.8, 89.7, 81.0, 76.2, 34.8, 31.0, 27.0, 25.0, 19.0.

IR (ATR-neat)  $\nu$  ( $\text{cm}^{-1}$ ) 3202, 2958, 1641, 1489, 1309, 1106, 1013, 849, 755, 691.

HRMS (ESI,  $m/z$ ) calcd for  $\text{C}_{23}\text{H}_{28}\text{NO}_2$  ( $\text{M}+\text{H}$ ) $^+$ : 350.2114, found: 350.2120.

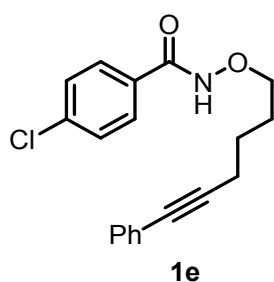

**1e** was obtained as a yellow oil.

$^1\text{H}$  NMR (300 MHz,  $\text{CDCl}_3$ )  $\delta$  9.31 (s, 1H), 7.64 (d,  $J = 8.4$  Hz, 2H), 7.39 – 7.32 (m, 3H), 7.30 (s, 1H), 7.26 (t,  $J = 3.3$  Hz, 3H), 4.05 (t,  $J = 6.2$  Hz, 2H), 2.47 (t,  $J = 6.8$  Hz, 2H), 1.94 – 1.80 (m, 2H), 1.79 – 1.66 (m, 2H).

$^{13}\text{C}$  NMR (75 MHz,  $\text{CDCl}_3$ )  $\delta$  165.8, 138.3, 131.6, 130.6, 128.9, 128.6, 128.2, 127.6, 124.0, 89.7, 81.3, 76.5, 27.1, 25.2, 19.1.

IR (ATR-neat)  $\nu$  ( $\text{cm}^{-1}$ ) 3207, 2943, 1645, 1482, 1246, 1152, 1091, 1013, 843, 754, 691.

HRMS (ESI,  $m/z$ ) calcd for  $\text{C}_{19}\text{H}_{19}\text{ClNO}_2$  ( $\text{M}+\text{H}$ ) $^+$ : 328.1099, found: 328.1099.

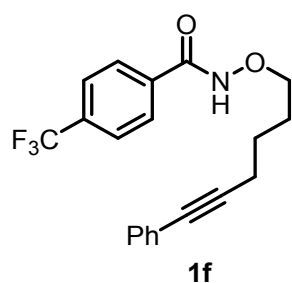

**1f** was obtained as a yellow oil.

$^1\text{H}$  NMR (300 MHz,  $\text{CDCl}_3$ )  $\delta$  9.24 (s, 1H), 7.79 (d,  $J = 8.1$  Hz, 2H), 7.59 (d,  $J = 8.1$  Hz, 2H), 7.36 (dd,  $J = 6.6, 3.0$  Hz, 2H), 7.27 – 7.23 (m, 3H), 4.09 (t,  $J = 6.2$  Hz, 2H), 2.48 (t,  $J = 6.8$  Hz, 2H), 1.97 – 1.83 (m, 2H), 1.79 – 1.69 (m, 2H).

$^{13}\text{C}$  NMR (75 MHz,  $\text{CDCl}_3$ )  $\delta$  165.1, 135.1, 133.5 (q,  $J = 32.7$  Hz), 131.4, 128.2, 127.6, 127.6, 125.5 (q,  $J = 3.7$  Hz), 125.2, 123.6, 121.6, 89.6, 81.1, 76.3, 26.9, 24.9, 19.0.

---

$^{19}\text{F}$  NMR (376 MHz,  $\text{CDCl}_3$ )  $\delta$  -63.1.

IR (ATR-neat)  $\nu$  ( $\text{cm}^{-1}$ ) 3195, 2943, 1651, 1490, 1324, 1126, 1066, 855, 755, 691.

HRMS (ESI,  $m/z$ ) calcd for  $\text{C}_{20}\text{H}_{19}\text{F}_3\text{NO}_2$  ( $\text{M}+\text{H}$ ) $^+$ : 362.1362, found: 362.1370.

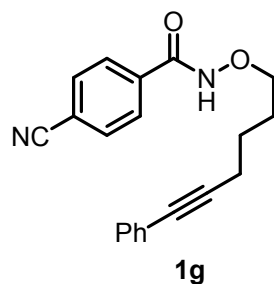

**1g** was obtained as a yellow oil.

$^1\text{H}$  NMR (300 MHz,  $\text{CDCl}_3$ )  $\delta$  9.70 (s, 1H), 7.82 (d,  $J = 7.3$  Hz, 2H), 7.62 (d,  $J = 8.6$  Hz, 2H), 7.40 – 7.31 (m, 2H), 7.27 – 7.23 (m, 3H), 4.07 (s, 2H), 2.46 (t,  $J = 6.8$  Hz, 2H), 1.87 (d,  $J = 6.5$  Hz, 2H), 1.79 – 1.66 (m, 2H).

$^{13}\text{C}$  NMR (75 MHz,  $\text{CDCl}_3$ )  $\delta$  164.4, 135.8, 132.2, 131.4, 128.1, 127.8, 127.6, 123.6, 117.7, 115.2, 89.5, 81.1, 76.3, 26.9, 24.9, 19.0.

IR (ATR-neat)  $\nu$  ( $\text{cm}^{-1}$ ) 3199, 2946, 2231, 1651, 1489, 1282, 1017, 853, 755, 691.

HRMS (ESI,  $m/z$ ) calcd for  $\text{C}_{20}\text{H}_{19}\text{N}_2\text{O}_2$  ( $\text{M}+\text{H}$ ) $^+$ : 319.1441, found: 319.1437.

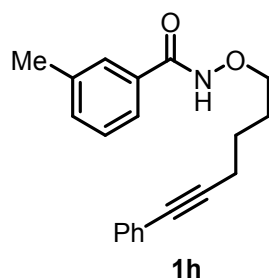

**1h** was obtained as a yellow oil.



---

$^1\text{H}$  NMR (300 MHz,  $\text{CDCl}_3$ )  $\delta$  9.08 (s, 1H), 7.55 (s, 1H), 7.48 (d,  $J = 7.1$  Hz, 1H), 7.37 (dd,  $J = 6.2, 3.0$  Hz, 2H), 7.27 – 7.23 (m, 5H), 4.06 (t,  $J = 6.3$  Hz, 2H), 2.47 (t,  $J = 6.8$  Hz, 2H), 2.33 (s, 3H), 1.94 – 1.81 (m, 2H), 1.80 – 1.67 (m, 2H).

$^{13}\text{C}$  NMR (75 MHz,  $\text{CDCl}_3$ )  $\delta$  166.9, 138.6, 132.6, 132.3, 131.6, 128.5, 128.1, 127.8, 127.5, 124.1, 89.7, 81.2, 76.4, 27.3, 25.3, 21.2, 19.2.

IR (ATR-neat)  $\nu$  ( $\text{cm}^{-1}$ ) 3193, 2945, 1644, 1488, 1304, 1040, 807, 755, 689.

HRMS (ESI,  $m/z$ ) calcd for  $\text{C}_{20}\text{H}_{22}\text{NO}_2$  ( $\text{M}+\text{H}$ ) $^+$ : 308.1645, found: 308.1634.

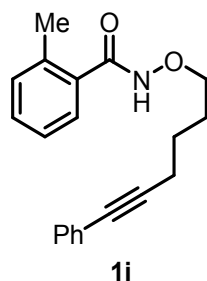

**1i** was obtained as a yellow oil.

$^1\text{H}$  NMR (300 MHz,  $\text{CDCl}_3$ )  $\delta$  8.65 (s, 1H), 7.39 – 7.32 (m, 2H), 7.31 – 7.22 (m, 5H), 7.22 – 7.09 (m, 2H), 4.06 (s, 2H), 2.46 (d,  $J = 6.9$  Hz, 2H), 2.40 (s, 3H), 1.89 – 1.72 (m, 4H).

$^{13}\text{C}$  NMR (101 MHz,  $\text{CDCl}_3$ )  $\delta$  167.9, 136.8, 132.7, 131.4, 131.0, 130.4, 128.1, 127.5, 127.0, 125.6, 123.7, 89.6, 81.1, 76.3, 27.0, 25.0, 19.5, 19.0.

IR (ATR-neat)  $\nu$  ( $\text{cm}^{-1}$ ) 3172, 2945, 1646, 1489, 1026, 895, 755, 691.

HRMS (ESI,  $m/z$ ) calcd for  $\text{C}_{20}\text{H}_{22}\text{NO}_2$  ( $\text{M}+\text{H}$ ) $^+$ : 308.1645, found: 308.1633.

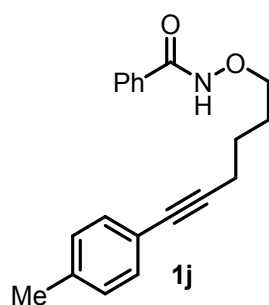

---

**1j** was obtained as a yellow oil.

$^1\text{H}$  NMR (300 MHz,  $\text{CDCl}_3$ )  $\delta$  10.30 (s, 1H), 7.83 – 7.73 (m, 2H), 7.45 (t,  $J = 7.4$  Hz, 1H), 7.32 (dd,  $J = 18.9, 7.7$  Hz, 4H), 7.07 (d,  $J = 7.8$  Hz, 2H), 4.03 (t,  $J = 6.4$  Hz, 2H), 2.41 (t,  $J = 6.9$  Hz, 2H), 2.32 (s, 3H), 1.93 – 1.79 (m, 2H), 1.77 – 1.64 (m, 2H).

$^{13}\text{C}$  NMR (75 MHz,  $\text{CDCl}_3$ )  $\delta$  166.4, 137.4, 131.8, 131.7, 131.3, 128.8, 128.4, 127.1, 120.6, 88.9, 81.0, 76.0, 27.0, 25.0, 21.2, 19.0.

IR (ATR-neat)  $\nu$  ( $\text{cm}^{-1}$ ) 3201, 2946, 1646, 1509, 1309, 1022, 816, 710, 692.

HRMS (ESI,  $m/z$ ) calcd for  $\text{C}_{20}\text{H}_{22}\text{NO}_2$  ( $\text{M}+\text{H}$ ) $^+$ : 308.1645, found: 308.1632.

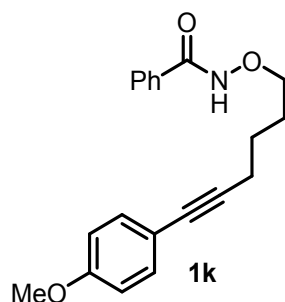

**1k** was obtained as a yellow oil.

$^1\text{H}$  NMR (300 MHz,  $\text{CDCl}_3$ )  $\delta$  9.05 (s, 1H), 7.71 (d,  $J = 7.3$  Hz, 2H), 7.47 (t,  $J = 7.1$  Hz, 1H), 7.36 (dd,  $J = 11.5, 4.3$  Hz, 2H), 7.30 (d,  $J = 8.9$  Hz, 2H), 6.79 (dd,  $J = 9.2, 2.4$  Hz, 2H), 4.07 (t,  $J = 6.2$  Hz, 2H), 3.78 (s, 3H), 2.45 (t,  $J = 6.8$  Hz, 2H), 1.95 – 1.82 (m, 2H), 1.78 – 1.66 (m, 2H).

$^{13}\text{C}$  NMR (75 MHz,  $\text{CDCl}_3$ )  $\delta$  166.6, 159.1, 132.8, 132.0, 131.9, 128.6, 127.1, 116.0, 113.8, 88.1, 80.8, 76.4, 55.2, 27.0, 25.2, 19.1.

IR (ATR-neat)  $\nu$  ( $\text{cm}^{-1}$ ) 3203, 2950, 1646, 1508, 1243, 1024, 831, 710, 692.

HRMS (ESI,  $m/z$ ) calcd for  $\text{C}_{20}\text{H}_{22}\text{NO}_3$  ( $\text{M}+\text{H}$ ) $^+$ : 324.1594, found: 324.1586.

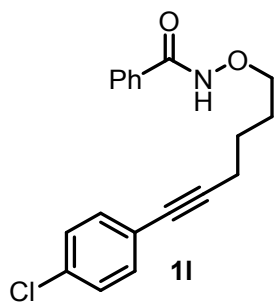

**1l** was obtained as a red solid. Melting point 49-51 °C.

$^1\text{H NMR}$  (300 MHz,  $\text{CDCl}_3$ )  $\delta$  8.98 (s, 1H), 7.77 – 7.69 (m, 2H), 7.56 – 7.47 (m, 1H), 7.41 (t,  $J = 7.4$  Hz, 2H), 7.33 – 7.22 (m, 4H), 4.09 (t,  $J = 6.3$  Hz, 2H), 2.49 (t,  $J = 6.8$  Hz, 2H), 1.94 – 1.81 (m, 2H), 1.80 – 1.67 (m, 2H).

$^{13}\text{C NMR}$  (75 MHz,  $\text{CDCl}_3$ )  $\delta$  166.5, 133.4, 132.7, 131.9, 131.8, 128.5, 128.4, 127.0, 122.2, 90.8, 79.9, 76.1, 27.0, 24.9, 19.0.

IR (ATR-neat)  $\nu$  ( $\text{cm}^{-1}$ ) 3176, 2943, 1643, 1486, 1314, 1089, 1012, 825, 692.

HRMS (ESI,  $m/z$ ) calcd for  $\text{C}_{19}\text{H}_{19}\text{ClNO}_2$  ( $\text{M}+\text{H}$ ) $^+$ : 328.1099, found: 328.1103.

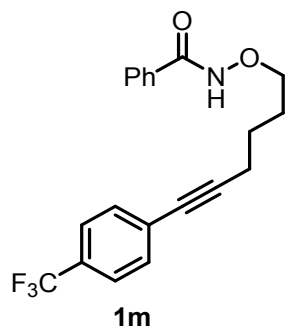

**1m** was obtained as a red solid. Melting point 52-54 °C.

$^1\text{H NMR}$  (300 MHz,  $\text{CDCl}_3$ )  $\delta$  9.01 (s, 1H), 7.72 (d,  $J = 7.3$  Hz, 2H), 7.52 – 7.44 (m, 5H), 7.42 – 7.34 (m, 2H), 4.08 (t,  $J = 5.8$  Hz, 2H), 2.50 (t,  $J = 6.8$  Hz, 2H), 1.93 – 1.84 (m, 2H), 1.82 – 1.70 (m, 2H).

$^{13}\text{C NMR}$  (75 MHz,  $\text{CDCl}_3$ )  $\delta$  166.4, 131.8, 131.8, 131.6, 129.4, 128.9, 128.4, 127.6, 127.1, 125.7, 125.0 (q,  $J = 3.8$  Hz), 122.1, 92.5, 79.8, 75.9, 27.0, 24.8, 19.0.

---

$^{19}\text{F}$  NMR (376 MHz,  $\text{CDCl}_3$ )  $\delta$  -62.8.

IR (ATR-neat)  $\nu$  ( $\text{cm}^{-1}$ ) 3204, 2942, 1645, 1323, 1160, 1102, 842, 691.

HRMS (ESI,  $m/z$ ) calcd for  $\text{C}_{20}\text{H}_{19}\text{F}_3\text{NO}_2$  ( $\text{M}+\text{H}$ ) $^+$ : 362.1362, found: 362.1370.

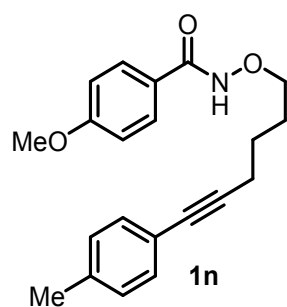

**1n** was obtained as a yellow oil.

$^1\text{H}$  NMR (300 MHz,  $\text{CDCl}_3$ )  $\delta$  9.24 (s, 1H), 7.76 – 7.64 (m, 2H), 7.28 (d,  $J$  = 8.1 Hz, 2H), 7.08 (d,  $J$  = 7.8 Hz, 2H), 6.89 – 6.79 (m, 2H), 4.06 (t,  $J$  = 6.3 Hz, 2H), 3.81 (s, 3H), 2.46 (t,  $J$  = 6.8 Hz, 2H), 2.34 (s, 3H), 1.92 – 1.79 (m, 2H), 1.78 – 1.64 (m, 2H).

$^{13}\text{C}$  NMR (75 MHz,  $\text{CDCl}_3$ )  $\delta$  166.1, 162.3, 137.4, 131.2, 128.9, 128.8, 124.0, 120.6, 113.6, 88.9, 80.9, 75.9, 55.1, 27.0, 25.0, 21.2, 18.9.

IR (ATR-neat)  $\nu$  ( $\text{cm}^{-1}$ ) 3200, 2940, 1638, 1605, 1494, 1253, 1179, 1024, 816, 759.

HRMS (ESI,  $m/z$ ) calcd for  $\text{C}_{21}\text{H}_{24}\text{NO}_3$  ( $\text{M}+\text{H}$ ) $^+$ : 338.1751, found: 338.1737.

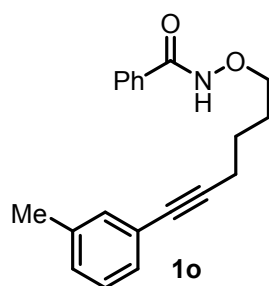

**1o** was obtained as a yellow oil.

---

$^1\text{H}$  NMR (300 MHz,  $\text{CDCl}_3$ )  $\delta$  9.58 (s, 1H), 7.80 – 7.71 (m, 2H), 7.53 – 7.43 (m, 1H), 7.36 (t,  $J$  = 7.6 Hz, 2H), 7.25 – 7.13 (m, 3H), 7.12 – 7.06 (m, 1H), 4.07 (t,  $J$  = 6.3 Hz, 2H), 2.46 (t,  $J$  = 6.8 Hz, 2H), 2.31 (s, 3H), 1.95 – 1.85 (m, 2H), 1.81 – 1.70 (m, 2H).

$^{13}\text{C}$  NMR (75 MHz,  $\text{CDCl}_3$ )  $\delta$  166.4, 137.7, 132.0, 131.8, 128.5, 128.4, 128.0, 127.0, 123.5, 89.3, 81.1, 76.1, 27.0, 25.0, 21.1, 19.0.

IR (ATR-neat)  $\nu$  ( $\text{cm}^{-1}$ ) 3207, 2946, 1647, 1483, 1152, 1022, 783, 711, 690.

HRMS (ESI,  $m/z$ ) calcd for  $\text{C}_{20}\text{H}_{22}\text{NO}_2$  ( $\text{M}+\text{H}$ ) $^+$ : 308.1645, found: 308.1632

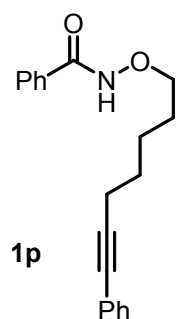

**1p** was obtained as a colorless oil.

$^1\text{H}$  NMR (300 MHz,  $\text{CDCl}_3$ )  $\delta$  9.38 (s, 1H), 7.74 (d,  $J$  = 7.4 Hz, 2H), 7.46 (t,  $J$  = 7.2 Hz, 1H), 7.39 – 7.33 (m, 4H), 7.25 (d,  $J$  = 2.8 Hz, 3H), 4.00 (t,  $J$  = 6.3 Hz, 2H), 2.38 (t,  $J$  = 6.5 Hz, 2H), 1.70 (dd,  $J$  = 13.5, 6.8 Hz, 2H), 1.65 – 1.46 (m, 4H).

$^{13}\text{C}$  NMR (101 MHz,  $\text{CDCl}_3$ )  $\delta$  166.4, 131.8, 131.4, 128.5, 128.1, 127.4, 127.1, 123.8, 90.0, 80.7, 76.5, 28.3, 27.5, 25.0, 19.2.

IR (ATR-neat)  $\nu$  ( $\text{cm}^{-1}$ ) 3197, 2939, 1644, 1488, 1309, 1021, 891, 755, 690.

HRMS (ESI,  $m/z$ ) calcd for  $\text{C}_{20}\text{H}_{22}\text{NO}_2$  ( $\text{M}+\text{H}$ ) $^+$ : 308.1645, found: 308.1631.

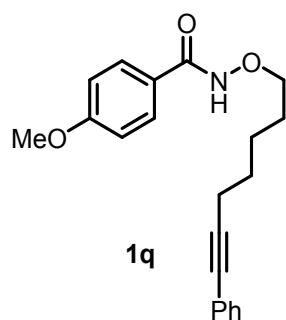

**1q** was obtained as a colorless oil.

$^1\text{H NMR}$  (300 MHz,  $\text{CDCl}_3$ )  $\delta$  9.37 (s, 1H), 7.72 (d,  $J = 8.4$  Hz, 2H), 7.37 (d,  $J = 3.7$  Hz, 2H), 7.25 (d,  $J = 4.8$  Hz, 3H), 6.85 (d,  $J = 8.5$  Hz, 2H), 3.99 (t,  $J = 6.3$  Hz, 2H), 3.78 (s, 3H), 2.38 (t,  $J = 6.2$  Hz, 2H), 1.70 (dd,  $J = 13.4, 6.9$  Hz, 2H), 1.61 – 1.52 (m, 4H).

$^{13}\text{C NMR}$  (101 MHz,  $\text{CDCl}_3$ )  $\delta$  166.2, 162.4, 131.4, 128.9, 128.1, 127.4, 124.1, 123.8, 113.7, 90.0, 80.7, 76.5, 55.2, 28.3, 27.5, 25.0, 19.2.

IR (ATR-neat)  $\nu$  ( $\text{cm}^{-1}$ ) 3197, 2938, 1638, 1606, 1490, 1255, 1026, 843, 757, 692.

HRMS (ESI,  $m/z$ ) calcd for  $\text{C}_{21}\text{H}_{24}\text{NO}_3$  ( $\text{M}+\text{H}$ ) $^+$ : 338.1751, found: 338.1748.

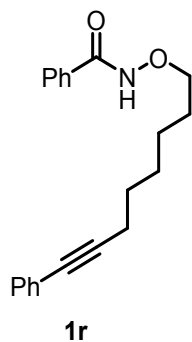

**1r** was obtained as a colorless oil.

$^1\text{H NMR}$  (300 MHz,  $\text{CDCl}_3$ )  $\delta$  9.72 (s, 1H), 7.75 (d,  $J = 7.4$  Hz, 2H), 7.44 (t,  $J = 7.2$  Hz, 1H), 7.40 – 7.30 (m, 4H), 7.24 (d,  $J = 4.5$  Hz, 3H), 3.97 (t,  $J = 6.4$  Hz, 2H), 2.36 (t,  $J = 6.8$  Hz, 2H), 1.65 (dd,  $J = 13.3, 6.8$  Hz, 2H), 1.60 – 1.50 (m, 2H), 1.49 – 1.30 (m, 4H).

---

$^{13}\text{C}$  NMR (101 MHz,  $\text{CDCl}_3$ )  $\delta$  166.2, 131.8, 131.7, 131.4, 128.4, 128.0, 127.4, 127.1, 123.8, 90.1, 80.6, 76.5, 28.5, 28.4, 27.8, 25.2, 19.1.

IR (ATR-neat)  $\nu$  ( $\text{cm}^{-1}$ ) 3201, 2934, 1646, 1488, 1311, 1022, 756, 711, 690.

HRMS (ESI,  $m/z$ ) calcd for  $\text{C}_{21}\text{H}_{24}\text{NO}_2$  ( $\text{M}+\text{H}$ ) $^+$ : 322.1801, found: 322.1812.

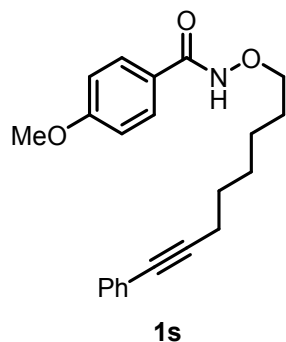

**1s** was obtained as a colorless oil.

$^1\text{H}$  NMR (300 MHz,  $\text{CDCl}_3$ )  $\delta$  9.29 (s, 1H), 7.72 (d,  $J = 8.7$  Hz, 2H), 7.37 (dd,  $J = 6.4, 3.0$  Hz, 2H), 7.26 – 7.23 (m, 3H), 6.86 (d,  $J = 8.7$  Hz, 2H), 3.98 (t,  $J = 6.6$  Hz, 2H), 3.79 (s, 3H), 2.37 (t,  $J = 6.9$  Hz, 2H), 1.74 – 1.63 (m, 2H), 1.62 – 1.52 (m, 2H), 1.51 – 1.31 (m, 4H).

$^{13}\text{C}$  NMR (101 MHz,  $\text{CDCl}_3$ )  $\delta$  166.2, 162.3, 131.4, 128.9, 128.1, 127.4, 124.1, 123.9, 113.7, 90.2, 80.6, 76.6, 55.2, 28.5, 28.5, 27.8, 25.3, 19.2.

IR (ATR-neat)  $\nu$  ( $\text{cm}^{-1}$ ) 3200, 2935, 1637, 1605, 1489, 1253, 1025, 842, 756, 691.

HRMS (ESI,  $m/z$ ) calcd for  $\text{C}_{22}\text{H}_{26}\text{NO}_3$  ( $\text{M}+\text{H}$ ) $^+$ : 352.1907, found: 352.1916.

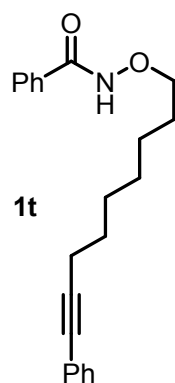

**1t** was obtained as a yellow oil.

$^1\text{H}$  NMR (300 MHz,  $\text{CDCl}_3$ )  $\delta$  9.12 (s, 1H), 7.73 (d,  $J = 7.3$  Hz, 2H), 7.48 (t,  $J = 7.2$  Hz, 1H), 7.38 (dd,  $J = 7.8, 4.7$  Hz, 4H), 7.25 (d,  $J = 2.2$  Hz, 3H), 4.00 (t,  $J = 6.5$  Hz, 2H), 2.38 (t,  $J = 6.9$  Hz, 2H), 1.68 (dd,  $J = 13.7, 6.8$  Hz, 2H), 1.58 (dd,  $J = 14.1, 6.9$  Hz, 2H), 1.50 – 1.25 (m, 6H).

$^{13}\text{C}$  NMR (101 MHz,  $\text{CDCl}_3$ )  $\delta$  166.4, 131.9, 131.8, 131.4, 128.5, 128.1, 127.4, 127.1, 123.9, 90.3, 80.6, 76.8, 28.8, 28.7, 28.5, 27.9, 25.6, 19.3.

IR (ATR-neat)  $\nu$  ( $\text{cm}^{-1}$ ) 3207, 2931, 1645, 1488, 1310, 1021, 891, 755, 690.

HRMS (ESI,  $m/z$ ) calcd for  $\text{C}_{22}\text{H}_{26}\text{NO}_2$  ( $\text{M}+\text{H}$ ) $^+$ : 336.1958, found: 336.1964.

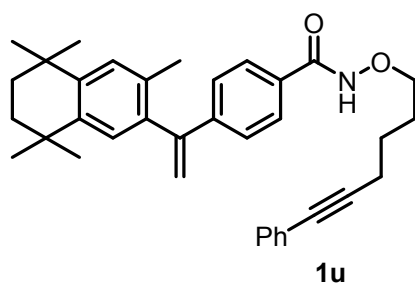

**1u** was obtained as a yellow solid. Melting point 84-86 °C.

$^1\text{H}$  NMR (300 MHz,  $\text{CDCl}_3$ )  $\delta$  8.91 (s, 1H), 7.62 (d,  $J = 8.1$  Hz, 2H), 7.40 – 7.31 (m, 2H), 7.28 (s, 1H), 7.22 (dd,  $J = 5.1, 1.7$  Hz, 4H), 7.09 (d,  $J = 8.7$  Hz, 2H), 5.75 (d,  $J = 1.1$  Hz, 1H), 5.28 (d,  $J = 1.0$  Hz, 1H), 4.07 (t,  $J = 6.1$  Hz, 2H), 2.48 (t,  $J = 6.8$  Hz, 2H), 1.93 (s, 3H), 1.91 – 1.83 (m, 2H), 1.80 – 1.71 (m, 2H), 1.70 (s, 4H), 1.30 (s, 6H), 1.27 (s, 6H).



$^{13}\text{C}$  NMR (101 MHz,  $\text{CDCl}_3$ )  $\delta$  166.4, 148.9, 144.8, 144.4, 142.3, 137.9, 132.7, 131.5, 130.6, 128.2, 128.0, 127.6, 127.1, 126.8, 123.8, 116.6, 89.7, 81.2, 76.4, 35.2, 35.2, 34.1, 33.9, 31.9, 31.9, 26.9, 25.1, 19.9, 19.1.

IR (ATR-neat)  $\nu$  ( $\text{cm}^{-1}$ ) 2955, 1640, 1490, 1311, 1041, 900, 856, 755, 691.

HRMS (ESI,  $m/z$ ) calcd for  $\text{C}_{36}\text{H}_{42}\text{NO}_2$  ( $\text{M}+\text{H}$ ) $^+$ : 520.3210, found: 520.3220.

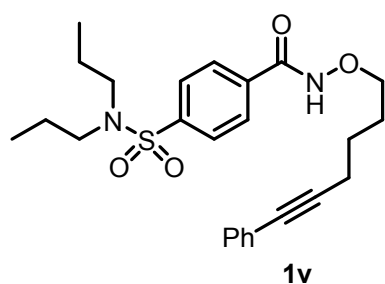

**1v** was obtained as a yellow oil.

$^1\text{H}$  NMR (300 MHz,  $\text{CDCl}_3$ )  $\delta$  9.32 (s, 1H), 7.81 – 7.69 (m, 4H), 7.42 – 7.33 (m, 2H), 7.26 (t,  $J = 3.1$  Hz, 3H), 4.10 (t,  $J = 5.8$  Hz, 2H), 3.13 – 2.99 (m, 4H), 2.49 (t,  $J = 6.8$  Hz, 2H), 1.90 (dd,  $J = 13.6, 6.4$  Hz, 2H), 1.77 (dd,  $J = 14.0, 6.8$  Hz, 2H), 1.60 – 1.45 (m, 4H), 0.86 (t,  $J = 7.4$  Hz, 6H).

$^{13}\text{C}$  NMR (75 MHz,  $\text{CDCl}_3$ )  $\delta$  164.9, 142.9, 135.6, 131.5, 128.2, 127.9, 127.6, 127.1, 123.7, 89.6, 81.1, 76.3, 49.9, 27.0, 25.0, 21.8, 19.0, 11.1.

IR (ATR-neat)  $\nu$  ( $\text{cm}^{-1}$ ) 3206, 2964, 1653, 1336, 1159, 1088, 991, 742, 692.

HRMS (ESI,  $m/z$ ) calcd for  $\text{C}_{25}\text{H}_{33}\text{N}_2\text{O}_4\text{S}$  ( $\text{M}+\text{H}$ ) $^+$ : 457.2155, found: 457.2167.

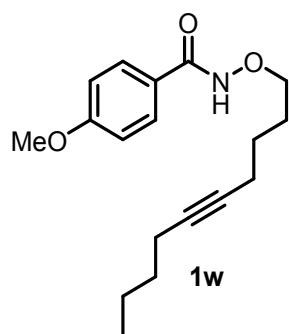

---

**1w** was obtained as a colorless oil.

$^1\text{H}$  NMR (300 MHz,  $\text{CDCl}_3$ )  $\delta$  9.00 (s, 1H), 7.71 (d,  $J = 8.8$  Hz, 2H), 6.89 (d,  $J = 8.9$  Hz, 2H), 4.01 (t,  $J = 6.4$  Hz, 2H), 3.83 (s, 3H), 2.25 – 2.07 (m, 4H), 1.90 – 1.73 (m, 2H), 1.66 – 1.54 (m, 2H), 1.51 – 1.30 (m, 4H), 0.89 (t,  $J = 7.1$  Hz, 3H).

$^{13}\text{C}$  NMR (75 MHz,  $\text{CDCl}_3$ )  $\delta$  166.4, 162.5, 128.9, 124.3, 113.8, 80.7, 79.5, 76.3, 55.3, 31.2, 27.0, 25.4, 21.9, 18.4, 18.4, 13.5.

IR (ATR-neat)  $\nu$  ( $\text{cm}^{-1}$ ) 3198, 2932, 1638, 1606, 1493, 1253, 1152, 1025, 842, 755.

HRMS (ESI,  $m/z$ ) calcd for  $\text{C}_{18}\text{H}_{26}\text{NO}_3$  ( $\text{M}+\text{H}$ ) $^+$ : 304.1907, found: 304.1906.

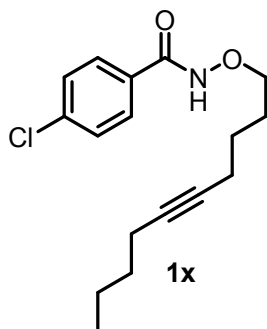

**1x** was obtained as a colorless solid. Melting point 58-60 °C.

$^1\text{H}$  NMR (300 MHz,  $\text{CDCl}_3$ )  $\delta$  9.22 (s, 1H), 7.69 (d,  $J = 8.3$  Hz, 2H), 7.38 (d,  $J = 8.4$  Hz, 2H), 4.02 (t,  $J = 6.1$  Hz, 2H), 2.27 – 2.06 (m, 4H), 1.87 – 1.72 (m, 2H), 1.67 – 1.53 (m, 2H), 1.52 – 1.30 (m, 4H), 0.89 (t,  $J = 7.1$  Hz, 3H).

$^{13}\text{C}$  NMR (75 MHz,  $\text{CDCl}_3$ )  $\delta$  165.4, 138.1, 130.2, 128.7, 128.6, 80.7, 79.3, 76.2, 31.1, 26.9, 25.3, 21.8, 18.3, 18.3, 13.5.

IR (ATR-neat)  $\nu$  ( $\text{cm}^{-1}$ ) 3197, 2930, 1643, 1479, 1314, 1092, 1012, 888, 844, 759.

HRMS (ESI,  $m/z$ ) calcd for  $\text{C}_{17}\text{H}_{23}\text{ClNO}_2$  ( $\text{M}+\text{H}$ ) $^+$ : 308.1412, found: 308.1416.

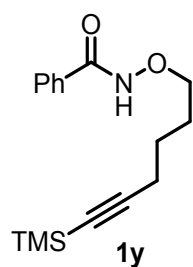

**1y** was obtained as a colorless oil.

$^1\text{H}$  NMR (300 MHz,  $\text{CDCl}_3$ )  $\delta$  9.36 (s, 1H), 7.72 (d,  $J = 7.3$  Hz, 2H), 7.47 (t,  $J = 7.0$  Hz, 1H), 7.37 (t,  $J = 7.4$  Hz, 2H), 4.00 (t,  $J = 6.1$  Hz, 2H), 2.25 (t,  $J = 6.9$  Hz, 2H), 1.76 (dd,  $J = 13.9, 6.5$  Hz, 2H), 1.68 – 1.55 (m, 2H), 0.11 (s, 9H).

$^{13}\text{C}$  NMR (75 MHz,  $\text{CDCl}_3$ )  $\delta$  166.5, 132.0, 131.9, 128.5, 127.1, 106.9, 84.9, 76.2, 27.0, 24.9, 19.5, 0.1.

IR (ATR-neat)  $\nu$  ( $\text{cm}^{-1}$ ) 3191, 2955, 2173, 1644, 1482, 1248, 1023, 841, 758, 692.

HRMS (ESI,  $m/z$ ) calcd for  $\text{C}_{16}\text{H}_{24}\text{NO}_2\text{Si}$  ( $\text{M}+\text{H}$ ) $^+$ : 290.1571, found: 290.1578.

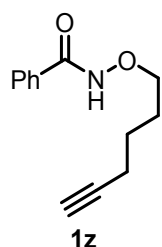

**1z** was obtained as a yellow oil.

$^1\text{H}$  NMR (300 MHz,  $\text{CDCl}_3$ )  $\delta$  9.19 (s, 1H), 7.74 (d,  $J = 7.7$  Hz, 2H), 7.56 – 7.45 (m, 1H), 7.40 (t,  $J = 7.1$  Hz, 2H), 4.04 (t,  $J = 5.5$  Hz, 2H), 2.31 – 2.20 (m, 2H), 1.95 (d,  $J = 2.4$  Hz, 1H), 1.81 (dd,  $J = 14.0, 6.4$  Hz, 2H), 1.72 – 1.59 (m, 2H).

$^{13}\text{C}$  NMR (151 MHz,  $\text{CDCl}_3$ )  $\delta$  166.5, 131.9, 131.8, 128.6, 127.1, 84.1, 76.1, 68.7, 26.8, 24.7, 18.0.

IR (ATR-neat)  $\nu$  ( $\text{cm}^{-1}$ ) 3198, 2949, 1644, 1483, 1311, 1023, 890, 711, 692.

HRMS (ESI,  $m/z$ ) calcd for  $\text{C}_{13}\text{H}_{16}\text{NO}_2$  ( $\text{M}+\text{H}$ ) $^+$ : 218.1175, found: 218.1174.

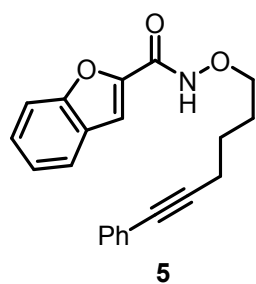

**5** was obtained as a yellow oil.

$^1\text{H}$  NMR (300 MHz,  $\text{CDCl}_3$ )  $\delta$  9.28 (s, 1H), 7.64 (d,  $J = 7.7$  Hz, 1H), 7.51 (s, 1H), 7.39 (dd,  $J = 9.3, 4.3$  Hz, 4H), 7.30 – 7.23 (m, 4H), 4.14 (t,  $J = 6.3$  Hz, 2H), 2.50 (t,  $J = 6.8$  Hz, 2H), 2.00 – 1.87 (m, 2H), 1.85 – 1.71 (m, 2H).

$^{13}\text{C}$  NMR (101 MHz,  $\text{CDCl}_3$ )  $\delta$  157.4, 154.7, 146.6, 131.5, 128.1, 127.5, 127.2, 127.0, 123.8, 122.6, 111.7, 111.6, 89.6, 81.1, 76.8, 27.0, 25.0, 19.0.

IR (ATR-neat)  $\nu$  ( $\text{cm}^{-1}$ ) 3185, 2944, 1653, 1489, 1296, 1115, 1033, 858, 746, 691.

HRMS (ESI,  $m/z$ ) calcd for  $\text{C}_{21}\text{H}_{20}\text{NO}_3$  ( $\text{M}+\text{H}$ ) $^+$ : 334.1438, found: 334.1428.

---

### 3. Ruthenium-Catalyzed Annulations

To a Schlenk flask equipped with a stir bar were added **1** (0.3 mmol), [Ru(*p*-cymene)Cl<sub>2</sub>]<sub>2</sub> (0.03 mmol), NaOAc (0.6 mmol) and MeOH (3.0 mL). The reaction was stirred for 4 h at 60 °C, cooled to room temperature. The solvent was removed in *vacuo* and the remaining residue was purified by a silica gel column chromatography to afford the product **3** (*n*-heptane/ethyl acetate from 1:1 to 1:4) and **2** (DCM/MeOH from 50:1 to 20:1).

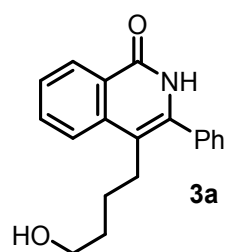

**3a** was obtained as a yellow solid (81%). Melting point 85-87 °C.

<sup>1</sup>H NMR (300 MHz, CDCl<sub>3</sub>) δ 9.85 (s, 1H), 8.35 (d, *J* = 7.9 Hz, 1H), 7.78 – 7.63 (m, 2H), 7.49 – 7.36 (m, 6H), 3.49 (t, *J* = 6.3 Hz, 2H), 2.68 – 2.55 (m, 2H), 2.47 (s, 1H), 1.70 – 1.58 (m, 2H), 1.56 – 1.46 (m, 2H).

<sup>13</sup>C NMR (151 MHz, CDCl<sub>3</sub>) δ 162.4, 137.8, 137.1, 135.3, 132.6, 129.1, 129.0, 128.7, 127.9, 126.2, 125.7, 123.6, 114.0, 62.1, 32.4, 26.9, 26.7.

IR (ATR-neat)  $\nu$  (cm<sup>-1</sup>) 2931, 2853, 1650, 1606, 1492, 1360, 1053, 1036, 889, 844, 764, 687.

HRMS (ESI, *m/z*) calcd for C<sub>19</sub>H<sub>20</sub>NO<sub>2</sub> (M+H)<sup>+</sup>: 294.1488, found: 294.1501.

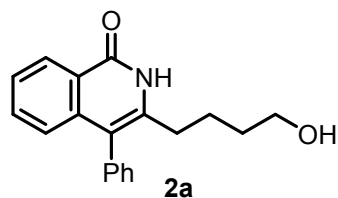

**2a** was obtained as a yellow solid (10%). Melting point 208-210 °C.

---

$^1\text{H}$  NMR (300 MHz,  $\text{CDCl}_3$ )  $\delta$  12.31 (s, 1H), 8.55 (d,  $J = 7.8$  Hz, 1H), 7.62 – 7.42 (m, 5H), 7.31 (dd,  $J = 10.0, 3.5$  Hz, 2H), 7.14 (d,  $J = 8.0$  Hz, 1H), 3.89 – 3.72 (m, 3H), 2.65 – 2.48 (m, 2H), 1.97 – 1.82 (m, 2H), 1.68 – 1.55 (m, 2H).

$^{13}\text{C}$  NMR (75 MHz,  $\text{CDCl}_3$ )  $\delta$  164.8, 139.4, 139.1, 136.3, 132.5, 131.2, 128.7, 127.7, 127.3, 126.0, 125.3, 124.3, 117.4, 61.2, 31.7, 30.4, 25.6.

IR (ATR-neat)  $\nu$  ( $\text{cm}^{-1}$ ) 2930, 2853, 1647, 1605, 1445, 1359, 1053, 890, 764, 701.

HRMS (ESI,  $m/z$ ) calcd for  $\text{C}_{19}\text{H}_{20}\text{NO}_2$  ( $\text{M}+\text{H}$ ) $^+$ : 294.1488, found: 294.1490.

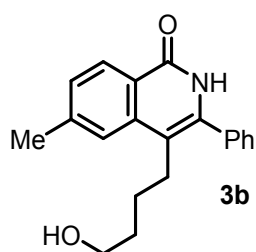

**3b** was obtained as a yellow solid (79%). Melting point 118-120 °C.

$^1\text{H}$  NMR (300 MHz,  $\text{CDCl}_3$ )  $\delta$  9.29 (s, 1H), 8.29 (d,  $J = 8.2$  Hz, 1H), 7.52 (s, 1H), 7.49 – 7.37 (m, 5H), 7.31 (dd,  $J = 8.2, 1.5$  Hz, 1H), 3.53 (t,  $J = 6.3$  Hz, 2H), 2.70 – 2.58 (m, 2H), 2.53 (s, 3H), 2.01 (s, 1H), 1.66 – 1.58 (m, 2H), 1.56 – 1.44 (m, 2H).

$^{13}\text{C}$  NMR (101 MHz,  $\text{CDCl}_3$ )  $\delta$  162.2, 143.2, 137.9, 137.0, 135.5, 129.1, 128.9, 128.8, 128.0, 127.9, 123.5, 123.5, 113.8, 62.3, 32.3, 26.8, 26.6, 22.3.

IR (ATR-neat)  $\nu$  ( $\text{cm}^{-1}$ ) 2922, 2871, 1642, 1613, 1442, 1313, 1162, 1063, 978, 829, 773, 696.

HRMS (ESI,  $m/z$ ) calcd for  $\text{C}_{20}\text{H}_{22}\text{NO}_2$  ( $\text{M}+\text{H}$ ) $^+$ : 308.1645, found: 308.1656.

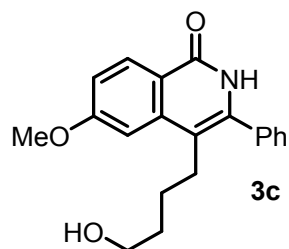

**3c** was obtained as a yellow solid (83%). Melting point 125-127 °C.

$^1\text{H}$  NMR (300 MHz,  $\text{CDCl}_3$ )  $\delta$  8.92 (s, 1H), 8.43 – 8.28 (m, 1H), 7.54 – 7.35 (m, 5H), 7.18 – 7.03 (m, 2H), 3.94 (s, 3H), 3.55 (d,  $J = 6.5$  Hz, 2H), 2.63 (t,  $J = 7.6$  Hz, 2H), 1.71 – 1.62 (m, 2H), 1.58 – 1.44 (m, 2H).

$^{13}\text{C}$  NMR (75 MHz,  $\text{CDCl}_3$ )  $\delta$  163.4, 161.7, 140.1, 137.8, 135.8, 130.3, 129.3, 128.9, 120.0, 114.8, 113.5, 106.4, 62.3, 55.5, 32.5, 27.1, 26.4.

IR (ATR-neat)  $\nu$  ( $\text{cm}^{-1}$ ) 2925, 2865, 1605, 1487, 1327, 1232, 1069, 1020, 844, 752, 699.

HRMS (ESI,  $m/z$ ) calcd for  $\text{C}_{20}\text{H}_{22}\text{NO}_3$  ( $\text{M}+\text{H}$ ) $^+$ : 324.1594, found: 324.1596.

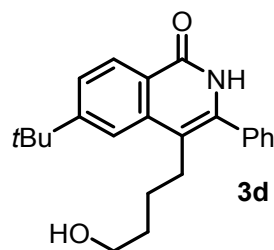

**3d** was obtained as a yellow solid (80%). Melting point 129-131 °C.

$^1\text{H}$  NMR (300 MHz,  $\text{CDCl}_3$ )  $\delta$  8.70 (s, 1H), 8.40 (d,  $J = 8.5$  Hz, 1H), 7.75 (d,  $J = 1.8$  Hz, 1H), 7.60 (dd,  $J = 8.5, 1.8$  Hz, 1H), 7.49 (dd,  $J = 5.3, 1.9$  Hz, 3H), 7.43 (dd,  $J = 6.9, 2.9$  Hz, 2H), 3.58 (t,  $J = 6.5$  Hz, 2H), 2.76 – 2.64 (m, 2H), 1.69 – 1.61 (m, 2H), 1.59 – 1.48 (m, 2H), 1.44 (s, 9H).

$^{13}\text{C}$  NMR (75 MHz,  $\text{CDCl}_3$ )  $\delta$  162.0, 156.2, 137.8, 137.1, 136.0, 129.2, 129.0, 128.9, 128.0, 124.4, 123.9, 119.9, 114.1, 62.4, 35.4, 32.6, 31.3, 27.0, 26.7.

---

IR (ATR-neat)  $\nu$  (cm<sup>-1</sup>) 2953, 2867, 1626, 1610, 1418, 1316, 1063, 1025, 842, 768, 700.

HRMS (ESI, m/z) calcd for C<sub>23</sub>H<sub>28</sub>NO<sub>2</sub> (M+H)<sup>+</sup>: 350.2114, found: 350.2119.

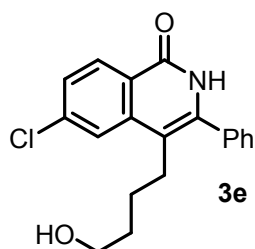

**3e** was obtained as a yellow solid (85%). Melting point 152-154 °C.

<sup>1</sup>H NMR (300 MHz, CDCl<sub>3</sub>)  $\delta$  9.03 (s, 1H), 8.36 (d, *J* = 8.6 Hz, 1H), 7.72 (d, *J* = 2.0 Hz, 1H), 7.51 (dt, *J* = 6.0, 2.5 Hz, 3H), 7.48 – 7.40 (m, 3H), 3.55 (d, *J* = 6.7 Hz, 2H), 2.69 – 2.57 (m, 2H), 1.66 – 1.58 (m, 2H), 1.58 – 1.47 (m, 2H), 1.42 (s, 1H).

<sup>13</sup>C NMR (101 MHz, CDCl<sub>3</sub>)  $\delta$  161.6, 139.5, 139.3, 138.4, 135.0, 129.8, 129.5, 129.0, 128.8, 126.9, 124.2, 123.3, 113.2, 62.2, 32.2, 26.8, 26.5.

IR (ATR-neat)  $\nu$  (cm<sup>-1</sup>) 2926, 2866, 1648, 1598, 1442, 1334, 1060, 1023, 870, 840, 765, 693.

HRMS (ESI, m/z) calcd for C<sub>19</sub>H<sub>19</sub>ClNO<sub>2</sub> (M+H)<sup>+</sup>: 328.1099, found: 328.1091.

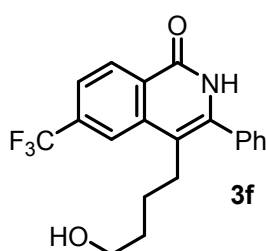

**3f** was obtained as a yellow solid (72%). Melting point 168-170 °C.

<sup>1</sup>H NMR (300 MHz, CDCl<sub>3</sub>)  $\delta$  9.03 (s, 1H), 8.56 (d, *J* = 8.3 Hz, 1H), 8.04 (s, 1H), 7.73 (dd, *J* = 8.3, 1.7 Hz, 1H), 7.53 (dt, *J* = 5.8, 2.4 Hz, 3H), 7.46 (dd, *J* = 6.7, 2.9 Hz, 2H), 3.65 – 3.53 (m, 2H), 2.77 – 2.66 (m, 2H), 1.68 – 1.63 (m, 2H), 1.58 – 1.47 (m, 2H), 1.29 (d, *J* = 8.4 Hz, 1H).



---

$^{13}\text{C}$  NMR (101 MHz,  $\text{CDCl}_3$ )  $\delta$  161.3, 138.5, 138.0, 134.9, 134.3 (d,  $J = 32.4$  Hz), 129.4 (d,  $J = 48.0$  Hz), 128.9 (d,  $J = 22.8$  Hz), 128.1, 122.4 (d,  $J = 3.3$  Hz), 121.1 (d,  $J = 4.1$  Hz), 113.8, 62.1, 32.1, 26.7, 26.6.

$^{19}\text{F}$  NMR (376 MHz,  $\text{CDCl}_3$ )  $\delta$  -63.0.

IR (ATR-neat)  $\nu$  ( $\text{cm}^{-1}$ ) 2942, 1655, 1286, 1159, 1124, 1060, 897, 843, 770, 697.

HRMS (ESI,  $m/z$ ) calcd for  $\text{C}_{20}\text{H}_{19}\text{F}_3\text{NO}_2$  ( $\text{M}+\text{H}$ ) $^+$ : 362.1362, found: 362.1366.

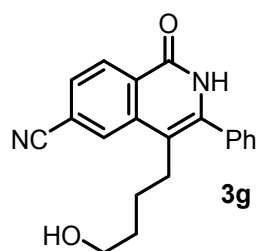

**3g** was obtained as a yellow solid (67%). Melting point 188-190  $^{\circ}\text{C}$ .

$^1\text{H}$  NMR (400 MHz,  $\text{DMSO}-d_6$ )  $\delta$  11.61 (s, 1H), 8.40 (d,  $J = 8.2$  Hz, 1H), 8.32 (d,  $J = 7.3$  Hz, 1H), 7.99 (dd,  $J = 30.3, 8.2$  Hz, 1H), 7.87 (d,  $J = 8.2$  Hz, 1H), 7.52 (d,  $J = 4.8$  Hz, 2H), 7.44 (d,  $J = 7.3$  Hz, 2H), 4.34 (t,  $J = 5.1$  Hz, 1H), 3.28 (dd,  $J = 11.6, 6.1$  Hz, 2H), 2.56 – 2.51 (m, 2H), 1.56 – 1.43 (m, 2H), 1.33 (dt,  $J = 12.7, 6.1$  Hz, 2H).

$^{13}\text{C}$  NMR (101 MHz,  $\text{DMSO}-d_6$ )  $\delta$  166.9, 160.8, 140.7, 138.1, 134.9, 132.8, 129.7, 129.5, 129.5, 128.8, 128.7, 128.4, 119.1, 115.5, 112.4, 60.7, 32.6, 27.0, 26.5.

IR (ATR-neat)  $\nu$  ( $\text{cm}^{-1}$ ) 2927, 2231, 1653, 1548, 1441, 1315, 1026, 841, 766, 731, 693.

HRMS (ESI,  $m/z$ ) calcd for  $\text{C}_{20}\text{H}_{19}\text{N}_2\text{O}_2$  ( $\text{M}+\text{H}$ ) $^+$ : 319.1441, found: 319.1439.

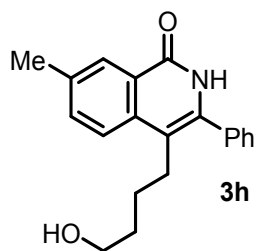

---

**3h** was obtained as a red solid (63%). Melting point 109-111 °C.

<sup>1</sup>H NMR (300 MHz, CDCl<sub>3</sub>) δ 8.63 (s, 1H), 8.28 (s, 1H), 7.67 (d, *J* = 8.4 Hz, 1H), 7.57 (dd, *J* = 8.5, 2.0 Hz, 1H), 7.53 – 7.40 (m, 5H), 3.61 – 3.49 (m, 2H), 2.72 – 2.62 (m, 2H), 2.52 (s, 3H), 1.71 – 1.59 (m, 2H), 1.56 – 1.46 (m, 2H), 1.44 (s, 1H).

<sup>13</sup>C NMR (101 MHz, CDCl<sub>3</sub>) δ 162.2, 136.4, 136.0, 135.5, 134.2, 129.0, 128.9, 128.7, 127.5, 125.6, 123.7, 114.0, 62.2, 32.4, 26.9, 26.7, 21.2.

IR (ATR-neat) ν (cm<sup>-1</sup>) 2921, 2860, 1651, 1495, 1349, 1064, 909, 826, 776, 702.

HRMS (ESI, *m/z*) calcd for C<sub>20</sub>H<sub>22</sub>NO<sub>2</sub> (M+H)<sup>+</sup>: 308.1645, found: 308.1649.

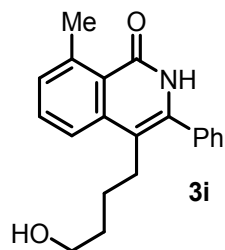

**3i** was obtained as a red solid (61%). Melting point 112-114 °C.

<sup>1</sup>H NMR (300 MHz, CDCl<sub>3</sub>) δ 9.67 (s, 1H), 7.63 – 7.52 (m, 2H), 7.47 (q, *J* = 3.9, 3.2 Hz, 5H), 7.23 (d, *J* = 6.9 Hz, 1H), 3.54 (t, *J* = 6.4 Hz, 2H), 2.83 (s, 3H), 2.69 – 2.59 (m, 2H), 1.66 – 1.57 (m, 2H), 1.57 – 1.48 (m, 2H), 1.44 (s, 1H).

<sup>13</sup>C NMR (75 MHz, CDCl<sub>3</sub>) δ 163.2, 142.6, 139.7, 137.4, 135.8, 131.8, 129.5, 129.1, 129.0, 128.8, 121.7, 113.7, 62.4, 32.6, 27.4, 26.6, 23.7.

IR (ATR-neat) ν (cm<sup>-1</sup>) 2924, 2866, 1645, 1471, 1305, 1071, 1027, 776, 761, 697.

HRMS (ESI, *m/z*) calcd for C<sub>20</sub>H<sub>22</sub>NO<sub>2</sub> (M+H)<sup>+</sup>: 308.1645, found: 308.1653.

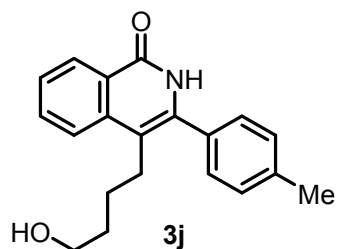

**3j** was obtained as a yellow solid (79%). Melting point 125-127 °C.

$^1\text{H}$  NMR (400 MHz,  $\text{CDCl}_3$ )  $\delta$  8.60 (s, 1H), 8.52 – 8.44 (m, 1H), 7.80 – 7.72 (m, 2H), 7.52 (ddd,  $J = 8.1, 6.3, 1.9$  Hz, 1H), 7.37 – 7.29 (m, 4H), 3.59 (t,  $J = 7.3$  Hz, 2H), 2.75 – 2.65 (m, 2H), 2.45 (s, 3H), 1.70 – 1.63 (m, 2H), 1.60 – 1.51 (m, 2H), 1.39 (s, 1H).

$^{13}\text{C}$  NMR (151 MHz,  $\text{CDCl}_3$ )  $\delta$  162.2, 139.2, 137.9, 137.0, 132.7, 132.5, 129.5, 128.7, 128.0, 126.2, 125.7, 123.7, 113.9, 62.3, 32.4, 26.9, 26.7, 21.3.

IR (ATR-neat)  $\nu$  ( $\text{cm}^{-1}$ ) 2930, 2864, 1738, 1643, 1468, 1353, 1217, 1058, 812, 766, .

HRMS (ESI,  $m/z$ ) calcd for  $\text{C}_{20}\text{H}_{22}\text{NO}_2$  ( $\text{M}+\text{H}$ ) $^+$ : 308.1645, found: 308.1647.

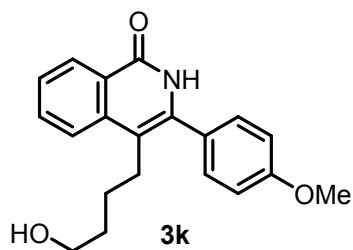

**3k** was obtained as a yellow solid (82%). Melting point 118-120 °C.

$^1\text{H}$  NMR (300 MHz,  $\text{CDCl}_3$ )  $\delta$  8.97 (s, 1H), 8.42 (d,  $J = 8.2$  Hz, 1H), 7.78 – 7.66 (m, 2H), 7.53 – 7.42 (m, 1H), 7.33 (d,  $J = 8.8$  Hz, 2H), 6.97 (d,  $J = 8.8$  Hz, 2H), 3.86 (s, 3H), 3.55 (t,  $J = 6.2$  Hz, 2H), 2.73 – 2.60 (m, 2H), 1.69 – 1.59 (m, 2H), 1.57 – 1.46 (m, 2H).

$^{13}\text{C}$  NMR (75 MHz,  $\text{CDCl}_3$ )  $\delta$  162.3, 160.1, 138.0, 136.9, 132.6, 130.2, 128.0, 127.7, 126.1, 125.7, 123.6, 114.2, 114.0, 62.3, 55.3, 32.5, 27.0, 26.7.

---

IR (ATR-neat)  $\nu$  (cm<sup>-1</sup>) 2928, 1644, 1605, 1511, 1246, 1292, 1181, 1032, 888, 839, 770.

HRMS (ESI, m/z) calcd for C<sub>20</sub>H<sub>22</sub>NO<sub>3</sub> (M+H)<sup>+</sup>: 324.1594, found: 324.1604.

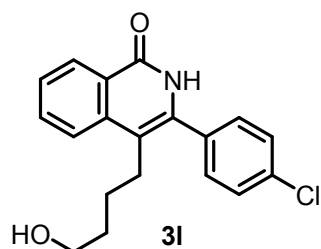

**3l** was obtained as a yellow solid (83%). Melting point 120-122 °C.

<sup>1</sup>H NMR (300 MHz, CDCl<sub>3</sub>)  $\delta$  8.81 (s, 1H), 8.52 – 8.39 (m, 1H), 7.77 (s, 2H), 7.59 – 7.47 (m, 3H), 7.40 (d, *J* = 7.4 Hz, 2H), 3.60 (s, 2H), 2.66 (d, *J* = 5.9 Hz, 2H), 1.74 – 1.64 (m, 2H), 1.59 – 1.48 (m, 2H).

<sup>13</sup>C NMR (101 MHz, CDCl<sub>3</sub>)  $\delta$  162.2, 137.7, 135.7, 135.4, 133.8, 132.9, 130.4, 129.2, 128.1, 126.7, 125.9, 123.8, 114.4, 62.3, 32.4, 27.0, 26.7.

IR (ATR-neat)  $\nu$  (cm<sup>-1</sup>) 2922, 2862, 1645, 1486, 1320, 1088, 1013, 813, 772, 722.

HRMS (ESI, m/z) calcd for C<sub>19</sub>H<sub>19</sub>ClNO<sub>2</sub> (M+H)<sup>+</sup>: 328.1099, found: 328.1094.

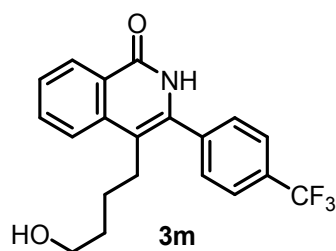

**3m** was obtained as a yellow solid (80%). Melting point 161-163 °C.

<sup>1</sup>H NMR (300 MHz, CDCl<sub>3</sub>)  $\delta$  9.97 (s, 1H), 8.35 (d, *J* = 8.3 Hz, 1H), 7.75 (dd, *J* = 4.1, 2.9 Hz, 4H), 7.59 – 7.48 (m, 3H), 3.55 (t, *J* = 6.1 Hz, 2H), 2.71 – 2.58 (m, 2H), 1.69 – 1.59 (m, 2H), 1.57 – 1.45 (m, 2H).

<sup>13</sup>C NMR (75 MHz, CDCl<sub>3</sub>)  $\delta$  162.5, 138.8, 137.6, 135.6, 132.9, 132.0, 129.7, 128.0, 127.3, 126.8, 125.8 (d, *J* = 3.7 Hz), 123.8, 114.6, 62.2, 32.4, 27.0, 26.8.

---

$^{19}\text{F}$  NMR (376 MHz,  $\text{CDCl}_3$ )  $\delta$  -62.8.

IR (ATR-neat)  $\nu$  ( $\text{cm}^{-1}$ ) 2922, 2868, 1643, 1321, 1156, 1121, 1067, 1016, 822, 775.

HRMS (ESI,  $m/z$ ) calcd for  $\text{C}_{20}\text{H}_{19}\text{F}_3\text{NO}_2$  ( $\text{M}+\text{H}$ ) $^+$ : 362.1362, found: 362.1360.

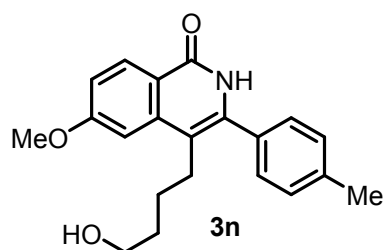

**3n** was obtained as a yellow solid (67%). Melting point 76-78 °C.

$^1\text{H}$  NMR (300 MHz,  $\text{CDCl}_3$ )  $\delta$  9.14 (s, 1H), 8.30 (d,  $J$  = 8.8 Hz, 1H), 7.27 – 7.19 (m, 4H), 7.08 (d,  $J$  = 2.1 Hz, 1H), 7.02 (dd,  $J$  = 8.8, 2.3 Hz, 1H), 3.90 (s, 3H), 3.53 (t,  $J$  = 6.3 Hz, 2H), 2.65 – 2.52 (m, 2H), 2.39 (s, 3H), 1.68 – 1.56 (m, 2H), 1.55 – 1.43 (m, 2H).

$^{13}\text{C}$  NMR (75 MHz,  $\text{CDCl}_3$ )  $\delta$  163.0, 162.0, 140.0, 138.9, 137.8, 132.5, 129.9, 129.3, 128.7, 119.4, 114.6, 113.5, 105.8, 62.0, 55.3, 32.3, 27.0, 26.4, 21.2.

IR (ATR-neat)  $\nu$  ( $\text{cm}^{-1}$ ) 2928, 2870, 1603, 1494, 1456, 1229, 1066, 1026, 845, 818, 784.

HRMS (ESI,  $m/z$ ) calcd for  $\text{C}_{21}\text{H}_{24}\text{NO}_3$  ( $\text{M}+\text{H}$ ) $^+$ : 338.1751, found: 338.1756.

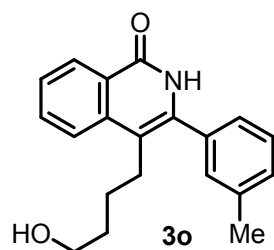

**3o** was obtained as a yellow oil (71%).

---

$^1\text{H}$  NMR (300 MHz,  $\text{CDCl}_3$ )  $\delta$  9.22 (s, 1H), 8.42 (d,  $J = 8.0$  Hz, 1H), 7.81 – 7.68 (m, 2H), 7.52 – 7.40 (m, 1H), 7.36 (t,  $J = 7.4$  Hz, 1H), 7.24 (dd,  $J = 12.4, 9.5$  Hz, 3H), 3.55 (t,  $J = 6.3$  Hz, 2H), 2.73 – 2.60 (m, 2H), 2.42 (s, 3H), 1.85 (s, 1H), 1.72 – 1.59 (m, 2H), 1.56 – 1.43 (m, 2H).

$^{13}\text{C}$  NMR (101 MHz,  $\text{CDCl}_3$ )  $\delta$  162.4, 138.4, 137.8, 137.2, 135.2, 132.6, 129.8, 129.5, 128.5, 127.8, 126.1, 126.0, 125.6, 123.6, 114.0, 62.1, 32.4, 26.9, 26.7, 21.4.

IR (ATR-neat)  $\nu$  ( $\text{cm}^{-1}$ ) 2925, 2861, 1643, 1483, 1347, 1153, 1033, 768, 728, 705.

HRMS (ESI,  $m/z$ ) calcd for  $\text{C}_{20}\text{H}_{22}\text{NO}_2$  ( $\text{M}+\text{H}$ ) $^+$ : 308.1645, found: 308.1654.

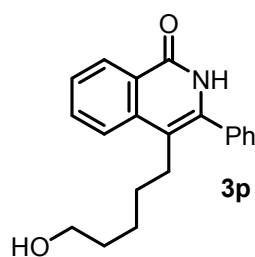

**3p** was obtained as a yellow solid (87%). Melting point 88-90 °C.

$^1\text{H}$  NMR (400 MHz,  $\text{CDCl}_3$ )  $\delta$  9.60 (d,  $J = 25.7$  Hz, 1H), 8.42 – 8.33 (m, 1H), 7.74 – 7.67 (m, 2H), 7.51 – 7.38 (m, 6H), 3.57 – 3.47 (m, 2H), 2.68 – 2.55 (m, 2H), 1.64 – 1.52 (m, 2H), 1.44 (dt,  $J = 13.4, 6.6$  Hz, 2H), 1.36 – 1.25 (m, 2H).

$^{13}\text{C}$  NMR (101 MHz,  $\text{CDCl}_3$ )  $\delta$  162.4, 137.8, 137.0, 135.3, 132.6, 129.0, 129.0, 128.6, 127.9, 126.2, 125.7, 123.6, 114.1, 62.5, 32.2, 30.3, 27.1, 25.7.

IR (ATR-neat)  $\nu$  ( $\text{cm}^{-1}$ ) 2930, 2866, 1650, 1605, 1551, 1469, 1360, 1159, 1037, 892, 763, 704.

HRMS (ESI,  $m/z$ ) calcd for  $\text{C}_{20}\text{H}_{22}\text{NO}_2$  ( $\text{M}+\text{H}$ ) $^+$ : 308.1645, found: 308.16440.

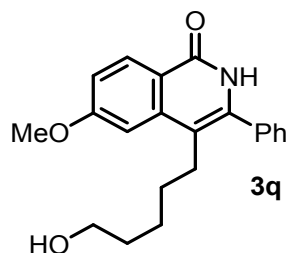

**3q** was obtained as a yellow solid (76%). Melting point 109-111 °C.

$^1\text{H}$  NMR (400 MHz,  $\text{CDCl}_3$ )  $\delta$  9.19 (s, 1H), 8.36 – 8.27 (m, 1H), 7.49 – 7.43 (m, 3H), 7.43 – 7.38 (m, 2H), 7.06 (dd,  $J = 7.8, 2.1$  Hz, 2H), 3.92 (s, 3H), 3.54 (t,  $J = 6.5$  Hz, 2H), 2.62 – 2.53 (m, 2H), 1.58 (dt,  $J = 15.7, 7.8$  Hz, 2H), 1.50 – 1.41 (m, 2H), 1.36 – 1.27 (m, 2H).

$^{13}\text{C}$  NMR (101 MHz,  $\text{CDCl}_3$ )  $\delta$  163.0, 162.0, 139.9, 137.7, 135.4, 130.0, 129.0, 128.9, 128.7, 119.5, 114.6, 113.7, 106.0, 62.5, 55.4, 32.2, 29.9, 27.2, 25.7.

IR (ATR-neat)  $\nu$  ( $\text{cm}^{-1}$ ) 2932, 2862, 1637, 1609, 1452, 1372, 1228, 1074, 1026, 837, 777, 700.

HRMS (ESI,  $m/z$ ) calcd for  $\text{C}_{21}\text{H}_{24}\text{NO}_3$  ( $\text{M}+\text{H}$ ) $^+$ : 338.1751, found: 338.1754.

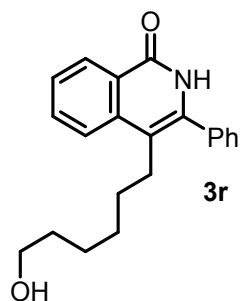

**3r** was obtained as a yellow solid (84%). Melting point 126-128 °C.

$^1\text{H}$  NMR (400 MHz,  $\text{CDCl}_3$ )  $\delta$  9.25 (s, 1H), 8.41 (d,  $J = 8.0$  Hz, 1H), 7.75 – 7.69 (m, 2H), 7.53 – 7.45 (m, 4H), 7.45 – 7.40 (m, 2H), 3.56 (t,  $J = 6.6$  Hz, 2H), 2.62 (dd,  $J = 9.2, 6.9$  Hz, 2H), 1.62 – 1.52 (m, 2H), 1.51 – 1.42 (m, 2H), 1.26 (dd,  $J = 8.8, 5.4$  Hz, 4H).

$^{13}\text{C}$  NMR (101 MHz,  $\text{CDCl}_3$ )  $\delta$  162.2, 137.9, 136.8, 135.5, 132.7, 129.2, 128.9, 128.8, 128.0, 126.3, 125.8, 123.7, 114.3, 62.8, 32.6, 30.4, 29.4, 27.1, 25.3.

---

IR (ATR-neat)  $\nu$  (cm<sup>-1</sup>) 2928, 2854, 1651, 1606, 1447, 1361, 1161, 1054, 894, 844, 764, 704.

HRMS (ESI, m/z) calcd for C<sub>21</sub>H<sub>24</sub>NO<sub>2</sub> (M+H)<sup>+</sup>: 322.1801, found: 322.1798.

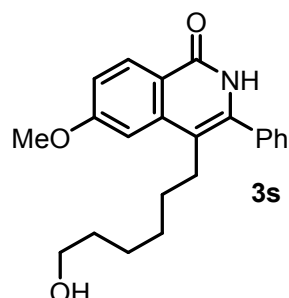

**3s** was obtained as a yellow solid (80%). Melting point 88-90 °C.

<sup>1</sup>H NMR (400 MHz, CDCl<sub>3</sub>)  $\delta$  9.44 (s, 1H), 8.31 (d,  $J$  = 9.3 Hz, 1H), 7.50 – 7.43 (m, 3H), 7.43 – 7.37 (m, 2H), 7.09 – 7.02 (m, 2H), 3.92 (s, 3H), 3.53 (t,  $J$  = 6.5 Hz, 2H), 2.60 – 2.51 (m, 2H), 1.54 (dd,  $J$  = 14.7, 7.1 Hz, 2H), 1.49 – 1.41 (m, 2H), 1.24 (dd,  $J$  = 9.9, 6.6 Hz, 4H).

<sup>13</sup>C NMR (101 MHz, CDCl<sub>3</sub>)  $\delta$  163.0, 162.0, 139.9, 137.7, 135.4, 130.0, 128.9, 128.6, 119.5, 114.5, 113.8, 105.9, 62.5, 55.3, 32.5, 30.0, 29.3, 27.1, 25.2.

IR (ATR-neat)  $\nu$  (cm<sup>-1</sup>) 2928, 2856, 1649, 1606, 1458, 1336, 1228, 1033, 941, 832, 775, 704.

HRMS (ESI, m/z) calcd for C<sub>22</sub>H<sub>26</sub>NO<sub>3</sub> (M+H)<sup>+</sup>: 352.1907, found: 352.1910.

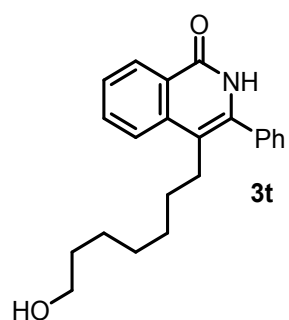

**3t** was obtained as a yellow solid (80%). Melting point 103-105 °C.



---

$^1\text{H}$  NMR (400 MHz,  $\text{CDCl}_3$ )  $\delta$  8.90 (s, 1H), 8.45 (d,  $J = 7.9$  Hz, 1H), 7.77 – 7.70 (m, 2H), 7.54 – 7.46 (m, 4H), 7.45 – 7.41 (m, 2H), 3.59 (t,  $J = 6.6$  Hz, 2H), 2.68 – 2.57 (m, 2H), 1.58 (dd,  $J = 14.5, 7.3$  Hz, 2H), 1.49 (dd,  $J = 13.8, 7.0$  Hz, 2H), 1.33 – 1.17 (m, 6H).

$^{13}\text{C}$  NMR (101 MHz,  $\text{CDCl}_3$ )  $\delta$  162.2, 137.9, 136.8, 135.5, 132.7, 129.1, 128.9, 128.8, 128.0, 126.3, 125.8, 123.7, 114.3, 62.9, 32.6, 30.4, 29.5, 28.9, 27.2, 25.6.

IR (ATR-neat)  $\nu$  ( $\text{cm}^{-1}$ ) 2926, 2851, 1650, 1614, 1445, 1359, 1035, 889, 842, 763, 718.

HRMS (ESI,  $m/z$ ) calcd for  $\text{C}_{22}\text{H}_{26}\text{NO}_2$  ( $\text{M}+\text{H}$ ) $^+$ : 336.1958, found: 336.1967.

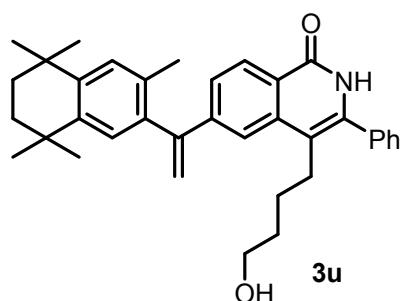

**3u** was obtained as a yellow solid (64%). Melting point 101-103 °C.

$^1\text{H}$  NMR (300 MHz,  $\text{CDCl}_3$ )  $\delta$  8.84 (s, 1H), 8.40 (d,  $J = 8.4$  Hz, 1H), 7.63 (dd,  $J = 8.5, 1.6$  Hz, 1H), 7.48 (dd,  $J = 5.1, 1.9$  Hz, 4H), 7.41 (dd,  $J = 6.7, 3.0$  Hz, 2H), 7.20 (s, 1H), 7.11 (d,  $J = 14.5$  Hz, 1H), 6.00 – 5.93 (m, 1H), 5.46 – 5.37 (m, 1H), 3.41 (d,  $J = 7.0$  Hz, 2H), 2.59 – 2.43 (m, 2H), 2.02 (s, 3H), 1.73 (s, 4H), 1.46 (q,  $J = 8.2$  Hz, 2H), 1.32 (d,  $J = 6.5$  Hz, 14H).

$^{13}\text{C}$  NMR (101 MHz,  $\text{CDCl}_3$ )  $\delta$  162.1, 149.3, 145.0, 144.4, 142.5, 138.2, 137.9, 137.1, 135.4, 132.9, 129.2, 128.9, 128.9, 128.1, 128.1, 128.0, 124.8, 124.5, 122.1, 117.0, 114.3, 62.3, 35.2, 35.2, 34.0, 33.9, 32.1, 32.0, 31.9, 26.9, 26.7, 20.0.

IR (ATR-neat)  $\nu$  ( $\text{cm}^{-1}$ ) 2951, 2910, 2864, 1650, 1625, 1493, 1454, 1361, 1268, 1024, 896, 766, 699.

HRMS (ESI,  $m/z$ ) calcd for  $\text{C}_{36}\text{H}_{42}\text{NO}_2$  ( $\text{M}+\text{H}$ ) $^+$ : 520.3210, found: 520.3210.

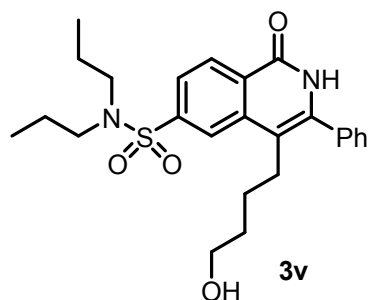

**3v** was obtained as a yellow solid (56%). Melting point 106-108 °C.

$^1\text{H}$  NMR (300 MHz,  $\text{CDCl}_3$ )  $\delta$  9.97 (s, 1H), 8.46 (d,  $J = 8.4$  Hz, 1H), 8.26 (d,  $J = 1.7$  Hz, 1H), 7.93 – 7.78 (m, 1H), 7.48 (dtt,  $J = 9.9, 6.3, 2.9$  Hz, 5H), 3.57 (t,  $J = 6.3$  Hz, 2H), 3.21 – 3.06 (m, 4H), 2.77 – 2.65 (m, 2H), 1.90 (s, 1H), 1.71 – 1.49 (m, 8H), 0.88 (t,  $J = 7.4$  Hz, 6H).

$^{13}\text{C}$  NMR (101 MHz,  $\text{CDCl}_3$ )  $\delta$  161.7, 144.0, 139.1, 138.2, 134.7, 129.5, 129.3, 128.9, 128.9, 127.9, 123.3, 123.1, 114.2, 61.9, 50.0, 31.9, 26.7, 22.0, 11.2.

IR (ATR-neat)  $\nu$  ( $\text{cm}^{-1}$ ) 2963, 2929, 2872, 1660, 1415, 1337, 1148, 1056, 986, 869, 772, 700.

HRMS (ESI,  $m/z$ ) calcd for  $\text{C}_{25}\text{H}_{33}\text{N}_2\text{O}_4\text{S}$  ( $\text{M}+\text{H}$ ) $^+$ : 457.2155, found: 457.2162.

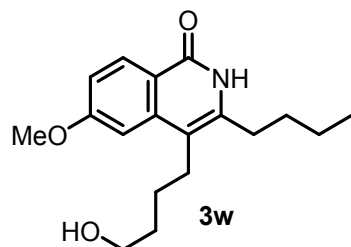

**3w** was obtained as a yellow solid (27%). Melting point 84-86 °C.

$^1\text{H}$  NMR (400 MHz,  $\text{CDCl}_3$ )  $\delta$  9.56 (s, 1H), 8.39 – 8.32 (m, 1H), 7.06 – 7.00 (m, 2H), 3.93 (s, 3H), 3.72 (t,  $J = 6.1$  Hz, 2H), 2.75 – 2.67 (m, 2H), 2.64 – 2.56 (m, 2H), 1.75 – 1.63 (m, 6H), 1.45 (dd,  $J = 14.9, 7.4$  Hz, 2H), 0.97 (t,  $J = 7.3$  Hz, 3H).

$^{13}\text{C}$  NMR (101 MHz,  $\text{CDCl}_3$ )  $\delta$  163.0, 162.8, 140.3, 138.3, 129.9, 119.0, 113.9, 112.2, 105.3, 62.6, 55.4, 32.7, 31.3, 31.0, 26.3, 26.2, 22.6, 13.9.

---

IR (ATR-neat)  $\nu$  (cm<sup>-1</sup>) 2923, 2855, 1651, 1606, 1463, 1337, 1239, 1218, 1064, 1028, 838, 749.

HRMS (ESI, m/z) calcd for C<sub>18</sub>H<sub>26</sub>NO<sub>3</sub> (M+H)<sup>+</sup>: 304.1907, found: 304.1902.

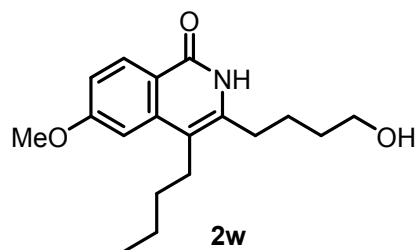

**2w** was obtained as a yellow solid (59%). Melting point 118-120 °C.

<sup>1</sup>H NMR (300 MHz, CDCl<sub>3</sub>)  $\delta$  11.97 (s, 1H), 8.45 (d,  $J$  = 8.8 Hz, 1H), 7.08 (dd,  $J$  = 11.6, 2.7 Hz, 2H), 4.13 (s, 1H), 3.93 (s, 3H), 3.87 (s, 2H), 2.81 – 2.62 (m, 4H), 1.96 – 1.82 (m, 2H), 1.81 – 1.69 (m, 2H), 1.63 – 1.40 (m, 4H), 0.99 (t,  $J$  = 7.1 Hz, 3H).

<sup>13</sup>C NMR (75 MHz, CDCl<sub>3</sub>)  $\delta$  164.2, 163.0, 140.8, 139.1, 129.8, 118.6, 114.4, 113.4, 105.1, 60.5, 55.3, 32.3, 31.6, 29.6, 26.3, 25.5, 22.9, 14.0.

IR (ATR-neat)  $\nu$  (cm<sup>-1</sup>) 2929, 2866, 1645, 1610, 1500, 1464, 1376, 1237, 1056, 841, 750.

HRMS (ESI, m/z) calcd for C<sub>18</sub>H<sub>26</sub>NO<sub>3</sub> (M+H)<sup>+</sup>: 304.1907, found: 304.1915.

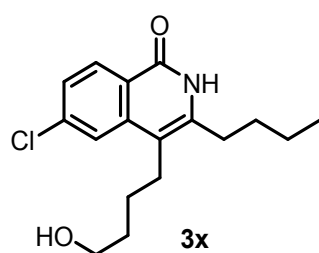

**3x** was obtained as a yellow solid (31%). Melting point 125-127 °C.

<sup>1</sup>H NMR (400 MHz, CDCl<sub>3</sub>)  $\delta$  10.08 (s, 1H), 8.34 (d,  $J$  = 8.6 Hz, 1H), 7.63 (d,  $J$  = 1.8 Hz, 1H), 7.38 (dd,  $J$  = 8.5, 1.8 Hz, 1H), 3.73 (t,  $J$  = 6.2 Hz, 2H), 2.74 – 2.67 (m, 2H), 2.67 – 2.60 (m, 2H), 1.75 – 1.61 (m, 6H), 1.46 (dd,  $J$  = 14.9, 7.4 Hz, 2H), 0.98 (t,  $J$  = 7.3 Hz, 3H).

---

$^{13}\text{C}$  NMR (101 MHz,  $\text{CDCl}_3$ )  $\delta$  162.7, 139.7, 139.4, 139.3, 129.6, 126.0, 122.6, 112.0, 62.6, 32.6, 31.3, 30.9, 26.5, 26.2, 22.6, 13.8.

IR (ATR-neat)  $\nu$  ( $\text{cm}^{-1}$ ) 2926, 2869, 1671, 1599, 1456, 1333, 1056, 909, 829, 775, 727.

HRMS (ESI,  $m/z$ ) calcd for  $\text{C}_{17}\text{H}_{23}\text{ClNO}_2$  ( $\text{M}+\text{H}$ ) $^+$ : 308.1412, found: 308.1422.

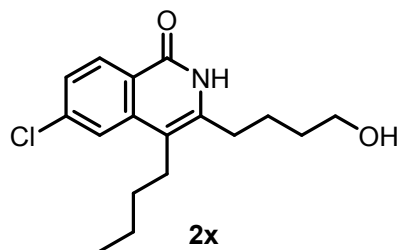

**2x** was obtained as a yellow solid (65%). Melting point 170-172  $^{\circ}\text{C}$ .

$^1\text{H}$  NMR (300 MHz,  $\text{CDCl}_3$ )  $\delta$  12.06 (s, 1H), 8.42 (d,  $J = 8.6$  Hz, 1H), 7.64 (d,  $J = 1.5$  Hz, 1H), 7.42 (dd,  $J = 8.6, 1.7$  Hz, 1H), 3.85 (s, 2H), 3.74 (s, 1H), 2.85 – 2.58 (m, 4H), 1.85 (d,  $J = 15.7$  Hz, 2H), 1.81 – 1.68 (m, 2H), 1.63 – 1.40 (m, 4H), 0.99 (t,  $J = 7.0$  Hz, 3H).

$^{13}\text{C}$  NMR (75 MHz,  $\text{CDCl}_3$ )  $\delta$  164.0, 140.0, 139.9, 139.4, 129.5, 126.3, 122.9, 122.6, 113.2, 60.8, 32.5, 31.6, 29.8, 26.2, 25.5, 22.9, 13.9.

IR (ATR-neat)  $\nu$  ( $\text{cm}^{-1}$ ) 2922, 2856, 1668, 1628, 1599, 1460, 1312, 1056, 910, 860, 775.

HRMS (ESI,  $m/z$ ) calcd for  $\text{C}_{17}\text{H}_{23}\text{ClNO}_2$  ( $\text{M}+\text{H}$ ) $^+$ : 308.1412, found: 308.1417.

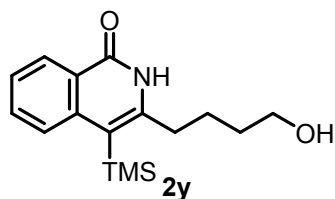

**2y** was obtained as a yellow solid (89%). Melting point 153-155  $^{\circ}\text{C}$ .

---

$^1\text{H}$  NMR (300 MHz,  $\text{CDCl}_3$ )  $\delta$  11.60 (s, 1H), 8.49 (d,  $J = 7.8$  Hz, 1H), 7.88 (d,  $J = 8.1$  Hz, 1H), 7.63 (t,  $J = 7.6$  Hz, 1H), 7.46 (t,  $J = 7.6$  Hz, 1H), 3.84 (s, 2H), 3.56 (s, 1H), 2.92 – 2.75 (m, 2H), 1.89 (dt,  $J = 14.5, 7.4$  Hz, 2H), 1.79 – 1.68 (m, 2H), 0.49 (s, 9H).

$^{13}\text{C}$  NMR (101 MHz,  $\text{CDCl}_3$ )  $\delta$  165.2, 148.1, 142.3, 131.8, 127.6, 127.1, 125.6, 124.5, 109.5, 60.6, 32.8, 31.5, 27.1, 3.3.

IR (ATR-neat)  $\nu$  ( $\text{cm}^{-1}$ ) 3432, 2931, 2892, 1647, 1586, 1465, 1355, 1275, 1251, 1077, 1030, 839, 778.

HRMS (ESI,  $m/z$ ) calcd for  $\text{C}_{16}\text{H}_{24}\text{NO}_2\text{Si}$  ( $\text{M}+\text{H}$ ) $^+$ : 290.1571, found: 290.1568.

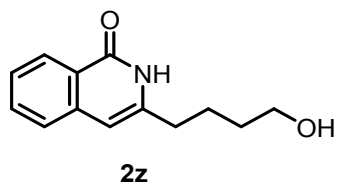

**2z** was obtained as a yellow solid (68%). Melting point 115-117  $^{\circ}\text{C}$ .

$^1\text{H}$  NMR (300 MHz,  $\text{CDCl}_3$ )  $\delta$  11.63 (s, 1H), 8.40 (d,  $J = 8.0$  Hz, 1H), 7.68 – 7.57 (m, 1H), 7.50 – 7.40 (m, 2H), 6.38 (s, 1H), 3.80 (t,  $J = 5.9$  Hz, 2H), 2.74 – 2.62 (m, 2H), 1.97 – 1.85 (m, 2H), 1.71 (dt,  $J = 12.6, 6.3$  Hz, 2H).

$^{13}\text{C}$  NMR (75 MHz,  $\text{CDCl}_3$ )  $\delta$  165.3, 142.0, 138.9, 132.7, 127.3, 126.1, 125.7, 104.7, 61.3, 32.6, 31.5, 25.3.

IR (ATR-neat)  $\nu$  ( $\text{cm}^{-1}$ ) 3410, 2924, 2880, 1631, 1548, 1346, 1264, 1064, 944, 819, 758.

HRMS (ESI,  $m/z$ ) calcd for  $\text{C}_{13}\text{H}_{16}\text{NO}_2$  ( $\text{M}+\text{H}$ ) $^+$ : 218.1175, found: 218.1177.

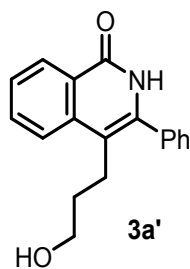

**3a'** was obtained as a yellow solid (31%).<sup>3</sup>

<sup>1</sup>H NMR (300 MHz, CDCl<sub>3</sub>) δ 8.64 (s, 1H), 8.49 (d, *J* = 8.0 Hz, 1H), 7.87 – 7.72 (m, 2H), 7.60 – 7.42 (m, 6H), 3.60 (q, *J* = 5.7 Hz, 2H), 2.83 – 2.71 (m, 2H), 1.87 – 1.78 (m, 2H).

<sup>13</sup>C NMR (101 MHz, CDCl<sub>3</sub>) δ 162.1, 137.7, 137.0, 135.3, 132.8, 129.3, 129.0, 128.9, 128.1, 126.5, 125.9, 123.7, 113.5, 62.2, 33.2, 23.5.

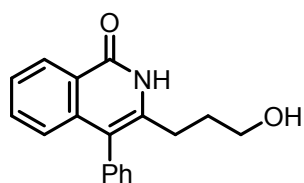

**2a'**

**2a'** was obtained as a yellow solid (58%).<sup>3</sup>

<sup>1</sup>H NMR (300 MHz, CDCl<sub>3</sub>) δ 12.40 (s, 1H), 8.41 (d, *J* = 7.9 Hz, 1H), 7.59 – 7.41 (m, 5H), 7.31 – 7.25 (m, 2H), 7.13 (d, *J* = 8.1 Hz, 1H), 4.06 (s, 1H), 3.71 (s, 2H), 2.73 (t, *J* = 7.2 Hz, 2H), 1.93 (d, *J* = 5.9 Hz, 2H).

<sup>13</sup>C NMR (75 MHz, CDCl<sub>3</sub>) δ 164.8, 139.4, 138.9, 136.0, 132.7, 131.0, 128.8, 127.8, 127.0, 126.2, 125.3, 123.7, 118.1, 60.9, 32.7, 27.1.

To a Schlenk flask equipped with a stir bar were added **5** (0.3 mmol), [Ru(*p*-cymene)Cl<sub>2</sub>]<sub>2</sub> (0.03 mmol), NaOAc (0.6 mmol) and MeOH (3.0 mL). The reaction was stirred for 4 h at 60 °C, cooled to room temperature. The solvent was removed in *vacuo* and the remaining residue was purified by a silica gel column chromatography to afford the product **4b** (*n*-heptane/ethyl acetate from 6:1 to 2:1), **6a** (*n*-heptane/ethyl acetate from 2:1 to 1:2), **6b** (*n*-heptane/ethyl acetate from 1:1 to 1:4) and **6c** (DCM/MeOH from 50:1 to 20:1).

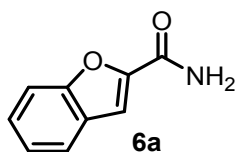

---

**6a** was obtained as a yellow solid (33%). Melting point 135-137 °C.

$^1\text{H}$  NMR (300 MHz,  $\text{CDCl}_3$ )  $\delta$  7.68 (d,  $J = 7.7$  Hz, 1H), 7.51 (d,  $J = 3.9$  Hz, 2H), 7.43 (t,  $J = 7.7$  Hz, 1H), 7.29 (dd,  $J = 14.1, 6.3$  Hz, 1H), 6.53 (s, 1H), 6.08 (s, 1H).

$^{13}\text{C}$  NMR (101 MHz,  $\text{CDCl}_3$ )  $\delta$  160.7, 154.9, 148.1, 127.5, 127.2, 123.8, 122.8, 111.8, 111.3.

IR (ATR-neat)  $\nu$  ( $\text{cm}^{-1}$ ) 3425, 3153, 2880, 1658, 1591, 1398, 986, 785, 740.

HRMS (ESI,  $m/z$ ) calcd for  $\text{C}_9\text{H}_8\text{NO}_2$  ( $\text{M}+\text{H}$ ) $^+$ : 162.0550, found: 162.0552.

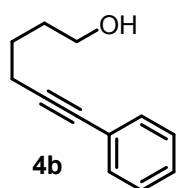

**4b** was obtained as a yellow oil (31%).

$^1\text{H}$  NMR (300 MHz,  $\text{CDCl}_3$ )  $\delta$  7.38 (dd,  $J = 6.4, 3.0$  Hz, 2H), 7.31 – 7.21 (m, 3H), 3.70 (t,  $J = 6.0$  Hz, 2H), 2.45 (t,  $J = 6.4$  Hz, 2H), 1.82 – 1.63 (m, 4H).

$^{13}\text{C}$  NMR (101 MHz,  $\text{CDCl}_3$ )  $\delta$  131.5, 128.2, 127.5, 123.8, 89.8, 80.9, 62.4, 31.9, 25.0, 19.2.

IR (ATR-neat)  $\nu$  ( $\text{cm}^{-1}$ ) 3322, 2937, 1489, 1062, 754, 690.

HRMS (ESI,  $m/z$ ) calcd for  $\text{C}_{12}\text{H}_{15}\text{O}$  ( $\text{M}+\text{H}$ ) $^+$ : 175.1117, found: 175.1115.

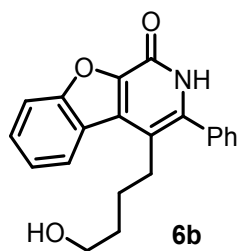

**6b** was obtained as a yellow oil (20%).

---

$^1\text{H}$  NMR (300 MHz,  $\text{CDCl}_3$ )  $\delta$  9.75 (s, 1H), 7.97 (d,  $J = 7.8$  Hz, 1H), 7.71 (d,  $J = 8.3$  Hz, 1H), 7.63 – 7.36 (m, 7H), 3.55 (d,  $J = 6.8$  Hz, 2H), 2.83 (d,  $J = 8.1$  Hz, 2H), 1.87 (s, 1H), 1.73 (q,  $J = 7.7$  Hz, 2H), 1.58 (t,  $J = 7.2$  Hz, 2H).

$^{13}\text{C}$  NMR (101 MHz,  $\text{CDCl}_3$ )  $\delta$  157.0, 153.8, 143.5, 138.1, 134.2, 130.5, 129.4, 129.2, 128.9, 128.7, 123.8, 123.3, 123.1, 113.6, 113.1, 62.2, 32.2, 27.9, 26.6.

IR (ATR-neat)  $\nu$  ( $\text{cm}^{-1}$ ) 2921, 2854, 1652, 1441, 1226, 1111, 1037, 840, 752, 695.

HRMS (ESI,  $m/z$ ) calcd for  $\text{C}_{21}\text{H}_{20}\text{NO}_3$  ( $\text{M}+\text{H}$ ) $^+$ : 334.1438, found: 334.1447.

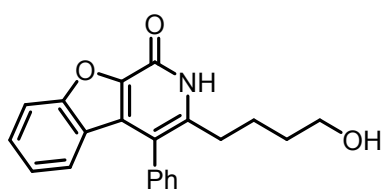

**6c**

**6c** was obtained as a yellow solid (29%). Melting point 237-239 °C.

$^1\text{H}$  NMR (300 MHz,  $\text{DMSO}-d_6$ )  $\delta$  11.98 (s, 1H), 7.83 – 7.71 (m, 1H), 7.63 – 7.46 (m, 4H), 7.41 (d,  $J = 6.4$  Hz, 2H), 7.16 (d,  $J = 8.1$  Hz, 1H), 6.66 – 6.54 (m, 1H), 4.32 (d,  $J = 4.6$  Hz, 1H), 3.26 (d,  $J = 6.4$  Hz, 2H), 2.40 (d,  $J = 7.4$  Hz, 2H), 1.54 (s, 2H), 1.30 (s, 2H).

$^{13}\text{C}$  NMR (101 MHz,  $\text{DMSO}-d_6$ )  $\delta$  156.5, 154.1, 142.1, 141.5, 135.7, 130.8, 129.7, 129.3, 129.1, 128.6, 123.8, 123.4, 122.7, 113.1, 112.6, 60.8, 32.4, 29.8, 26.5.

IR (ATR-neat)  $\nu$  ( $\text{cm}^{-1}$ ) 2856, 1659, 1462, 1443, 1192, 1030, 903, 749, 705.

HRMS (ESI,  $m/z$ ) calcd for  $\text{C}_{21}\text{H}_{20}\text{NO}_3$  ( $\text{M}+\text{H}$ ) $^+$ : 334.1438, found: 334.1447.



## 4. Additional Experiments

### Irreversible C-H bond metalation:

To a Schlenk flask equipped with a stir bar were added **1a** (0.3 mmol), [Ru(*p*-cymene)Cl<sub>2</sub>]<sub>2</sub> (0.03 mmol), NaOAc (0.6 mmol) and CD<sub>3</sub>OD (3.0 mL). The reaction was stirred for 30 min at 60 °C, cooled to room temperature. The solvent was removed in *vacuo* and the remaining residue was purified by a silica gel column chromatography (*n*-heptane/ethyl acetate or DCM/MeOH). **1a**, **2a** and **3a** were isolated and no deuterium incorporation was found.

### KIE experiments:

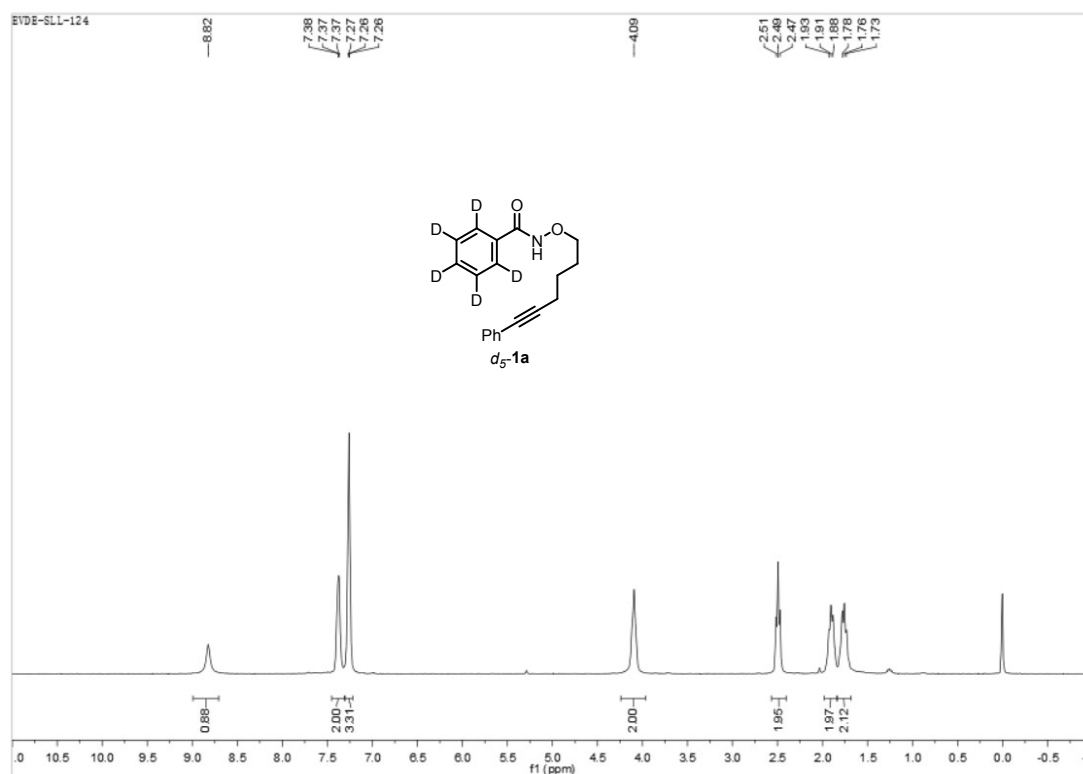

To one Schlenk flask equipped with a stir bar were added **1a** (0.15 mmol), [Ru(*p*-cymene)Cl<sub>2</sub>]<sub>2</sub> (0.015 mmol), NaOAc (0.3 mmol) and MeOH (1.5 mL). The reaction was stirred for 30 min at 60 °C, cooled to room temperature.

To another Schlenk flask equipped with a stir bar were added  $d_5$ -**1a** (0.15 mmol),  $[\text{Ru}(p\text{-cymene})\text{Cl}_2]_2$  (0.015 mmol), NaOAc (0.3 mmol) and MeOH (1.5 mL). The reaction was stirred for 30 min at 60 °C, cooled to room temperature.

Then these two reaction mixture were combined and the solvent was removed in *vacuo* and the remaining residue was purified by a silica gel column chromatography (*n*-heptane/ethyl acetate or DCM/MeOH) to afford the product **2a**, **3a**,  $d_4$ -**2a** and  $d_4$ -**3a**. The ratio of **2a** and  $d_4$ -**2a** was determined by  $^1\text{H}$  NMR to be 0.60:0.40 (see below). The ratio of **3a** and  $d_4$ -**3a** was determined by  $^1\text{H}$  NMR to be 0.59:0.41 (see below).

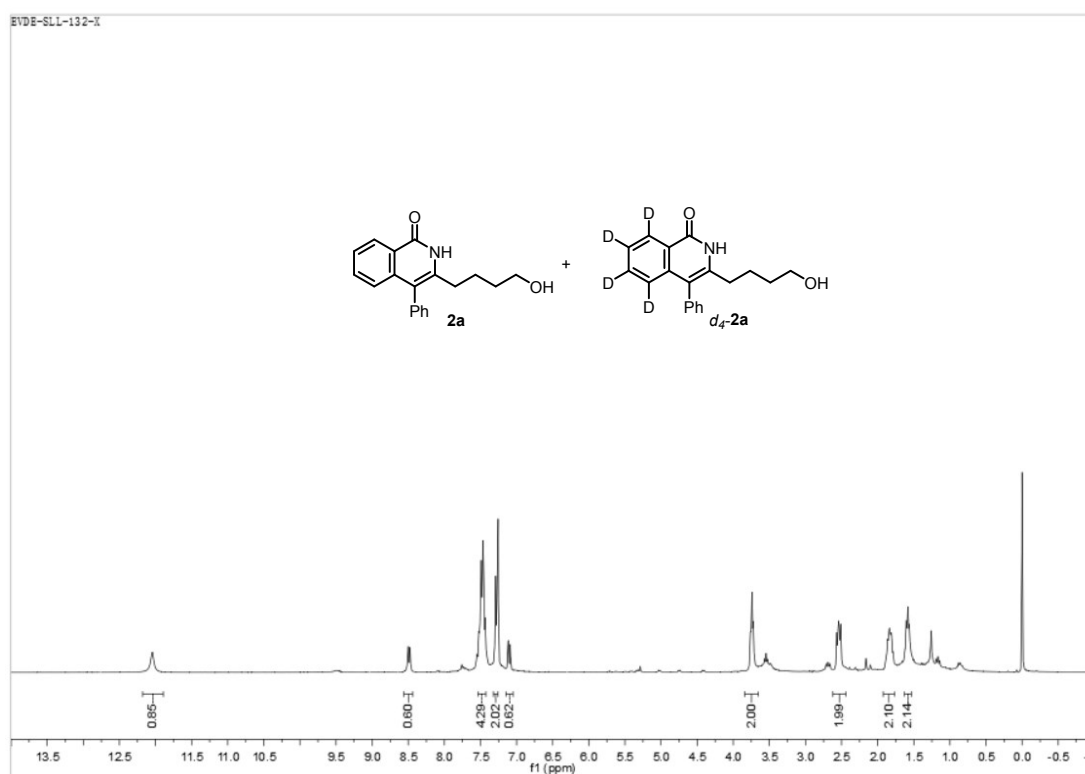

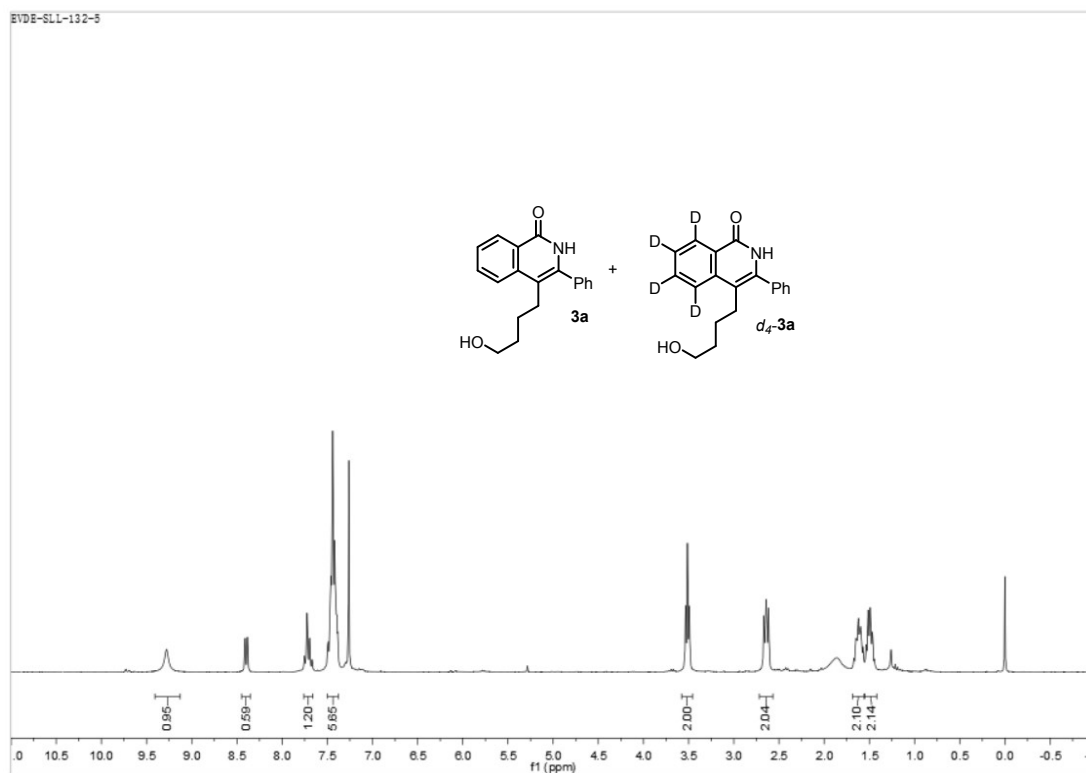

To a Schlenk flask equipped with a stir bar were added **1a** (0.15 mmol),  $d_5$ -**1a** (0.15 mmol), [Ru(*p*-cymene)Cl<sub>2</sub>]<sub>2</sub> (0.03 mmol), NaOAc (0.6 mmol) and MeOH (3.0 mL). The reaction was stirred for 30 min at 60 °C, cooled to room temperature. The solvent was removed in *vacuo* and the remaining residue was purified by a silica gel column chromatography (*n*-heptane/ethyl acetate or DCM/MeOH) to afford the product **2a**, **3a**,  $d_4$ -**2a** and  $d_4$ -**3a**. The ratio of **2a** and  $d_4$ -**2a** was determined by <sup>1</sup>H NMR to be 0.51:0.49 (see below). The ratio of **3a** and  $d_4$ -**3a** was determined by <sup>1</sup>H NMR to be 0.52:0.48 (see below).

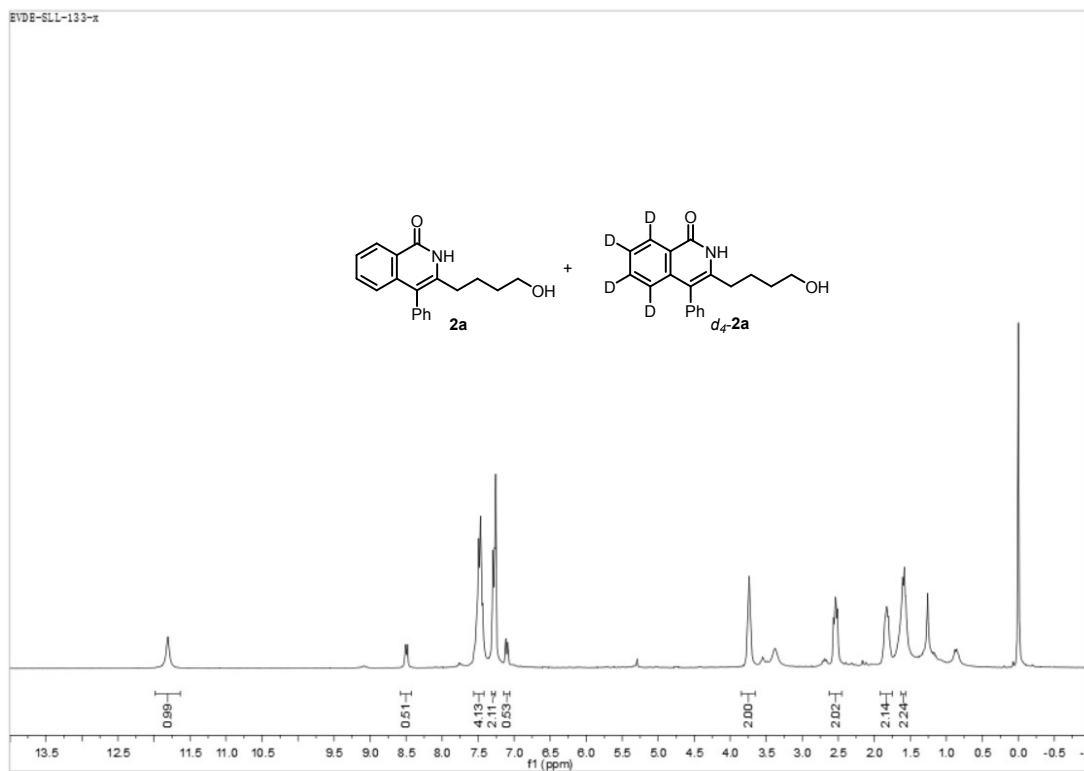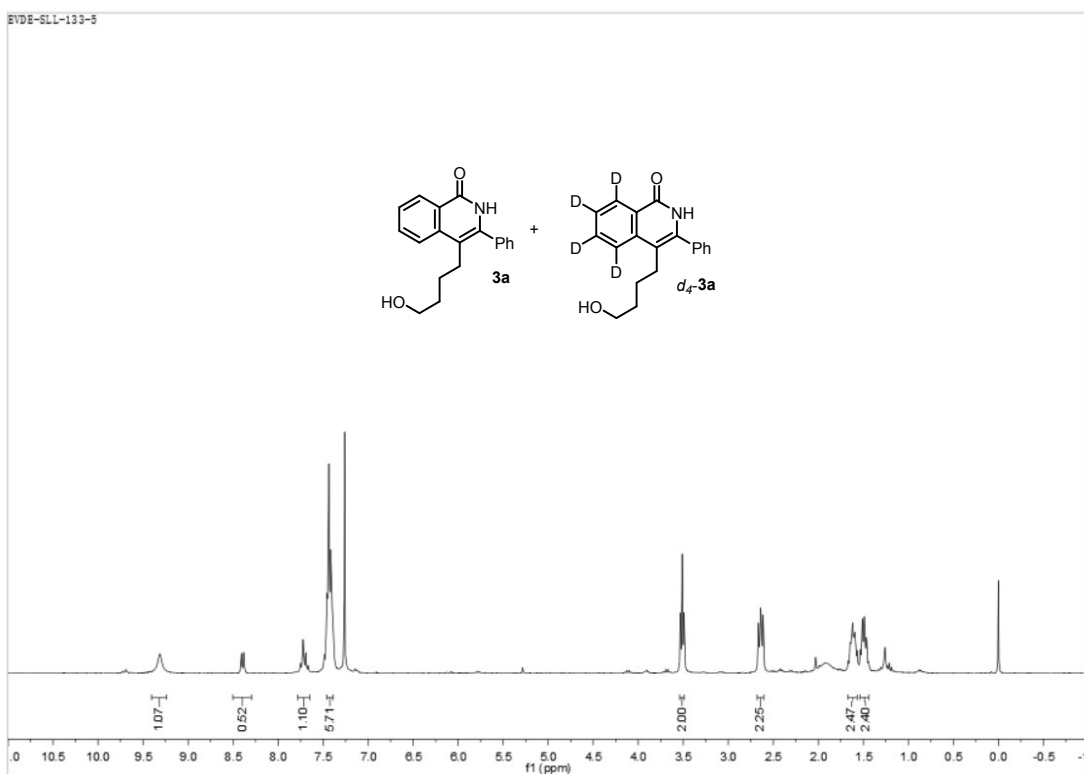

**Control experiment:**

---

To a Schlenk flask equipped with a stir bar were added **1a** (0.1 mmol), [Ru(*p*-cymene)Cl<sub>2</sub>]<sub>2</sub> (0.005 mmol), NaOAc (0.2 mmol) and MeOH (1.0 mL). The reaction was stirred for 30 min at r.t. The solvent was removed in *vacuo* and the remaining residue was purified by a silica gel column chromatography to afford the product **2a**, **3a**, **4a**, **4b** and **4c**.

**Reaction of benzamide and alcohol:**

To a Schlenk flask equipped with a stir bar were added **4a** (0.1 mmol), **4b** (0.15 mmol), [Ru(*p*-cymene)Cl<sub>2</sub>]<sub>2</sub> (0.01 mmol), NaOAc (0.2 mmol), Cu(OAc)<sub>2</sub> (0.2 mmol) and MeOH (1.0 mL). The reaction was stirred for 4 h at 60 °C, cooled to room temperature. The solvent was removed in *vacuo* and the remaining residue was purified by a silica gel column chromatography to afford the product **2a** and **3a**.

**Crossing experiment:**

To a Schlenk flask equipped with a stir bar were added **1c** (0.1 mmol), **1j** (0.1 mmol), [Ru(*p*-cymene)Cl<sub>2</sub>]<sub>2</sub> (0.02 mmol), NaOAc (0.4 mmol) and MeOH (2.0 mL). The reaction was stirred for 4 h at 60 °C, cooled to room temperature. The solvent was removed in *vacuo* and the remaining residue was purified by a silica gel column chromatography to afford the product **3a**, **3c**, **3j** and **3n**.

---

## 5. Single Crystal X-Ray Diffraction

A single crystal of **3c** was obtained by slow diffusion from a solution of the compound in DCM layered with heptane at room temperature for several days. X-ray intensity data were collected at 293(2) K on an Agilent SuperNova diffractometer with Eos CCD detector using MoK $\alpha$  radiation. The images were processed (unit cell determination, intensity data integration, correction for Lorentz and polarization effects, and empirical absorption correction) using CrysAlisPRO<sup>4</sup>. Using Olex2<sup>5</sup>, the structure was solved with the ShelXT<sup>6</sup> structure solution program using Intrinsic Phasing and refined with the ShelXL<sup>7</sup> refinement package using full-matrix least-squares minimization on F<sup>2</sup>. The asymmetric unit contains one molecule **3c** and one molecule DCM. All H atoms were placed in idealized positions and refined in the riding mode. Non-hydrogen atoms were refined anisotropically and hydrogen atoms in the riding mode with isotropic temperature factors fixed at 1.2 times U<sub>eq</sub> of the parent atoms (1.5 for -OH and methyl groups). Crystal data, data collection and structure refinement details are summarized in Table S1. Crystallographic data for **3c** has been deposited with the Cambridge Crystallographic Data Centre as supplementary publication number CCDC 1959807.

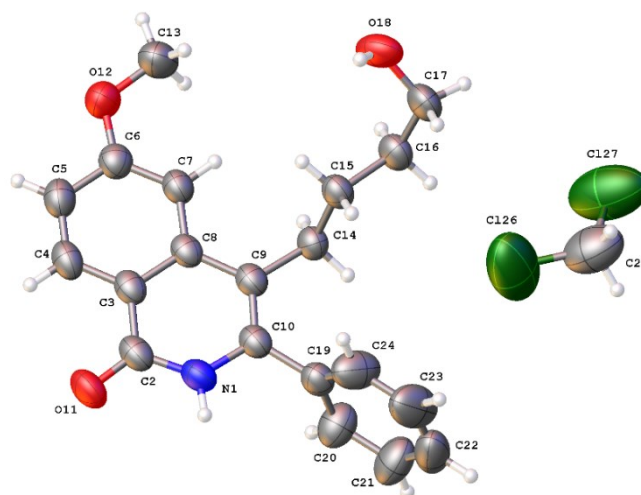

**Figure S1.** Molecular structure of **3c** showing the atom-labelling scheme. Displacement ellipsoids are drawn at the 50% probability level. H atoms are shown as small circles of arbitrary radii.

**Table S1.** Crystal data, data collection and structure refinement details of compound **3c**

|                                    | <b>3c</b>                                                                         |
|------------------------------------|-----------------------------------------------------------------------------------|
| Empirical formula                  | C <sub>20</sub> H <sub>21</sub> NO <sub>3</sub> , CH <sub>2</sub> Cl <sub>2</sub> |
| Formula weight                     | 408.30                                                                            |
| Temperature/K                      | 293(2)                                                                            |
| Crystal system                     | triclinic                                                                         |
| Space group                        | P-1                                                                               |
| a/Å                                | 8.9486(5)                                                                         |
| b/Å                                | 9.5948(4)                                                                         |
| c/Å                                | 12.8823(6)                                                                        |
| α/°                                | 82.687(4)                                                                         |
| β/°                                | 71.563(4)                                                                         |
| γ/°                                | 87.665(4)                                                                         |
| Volume/Å <sup>3</sup>              | 1040.77(9)                                                                        |
| Z                                  | 2                                                                                 |
| ρ <sub>calc</sub> /cm <sup>3</sup> | 1.303                                                                             |
| μ/mm <sup>-1</sup>                 | 0.332                                                                             |
| F(000)                             | 428.0                                                                             |
| Crystal size/mm <sup>3</sup>       | 0.4 × 0.15 × 0.15                                                                 |

|                                                  |                                                               |
|--------------------------------------------------|---------------------------------------------------------------|
| Radiation                                        | MoK $\alpha$ ( $\lambda = 0.71073 \text{ \AA}$ )              |
| 2 $\Theta$ range for data collection/ $^{\circ}$ | 4.798 to 52.742                                               |
| Index ranges                                     | $-11 \leq h \leq 11, -11 \leq k \leq 11, -16 \leq l \leq 16$  |
| Reflections collected                            | 21373                                                         |
| Independent reflections                          | 4239 [ $R_{\text{int}} = 0.0220, R_{\text{sigma}} = 0.0185$ ] |
| Data/restraints/parameters                       | 4239/0/250                                                    |
| Goodness-of-fit on $F^2$                         | 1.049                                                         |
| Final R indexes [ $I \geq 2\sigma(I)$ ]          | $R_1 = 0.0650, wR_2 = 0.1713$                                 |
| Final R indexes [all data]                       | $R_1 = 0.0866, wR_2 = 0.1897$                                 |
| Largest diff. peak/hole / $e \text{ \AA}^{-3}$   | 0.34/-0.43                                                    |

## 6. DFT Calculation Details

**Computational Details.** All the density functional theory (DFT) calculations were carried out using Gaussian 16 software<sup>8</sup> with B3LYP-D3/def2-TZVP method<sup>9</sup>. Vibrational frequency calculations were performed at the same level of theory to examine if the optimized structure is an intermediate or transition state. Both the singlet and triplet electronic states were considered for those crucial structures. Intrinsic reaction coordinate (IRC) calculations were performed for those key transition states to verify that they connect the right intermediates. The solvent effect of methanol was considered in the single point calculations with the implicit solvation model (SMD)<sup>10</sup>. All energies presented in the main text and here are Gibbs free energies relative to the substrate and the Ru(OAc)<sub>2</sub>(*p*-cymene) catalyst, unless otherwise stated, and are calculated in each case using a standard state for the translational component of the partition function corresponding to a concentration of 1 mol dm<sup>-3</sup>. The default free energies obtained from Gaussian are therefore corrected for all species by adding a term  $RT \ln(24.5) = 2.12 \text{ kcal mol}^{-1}$ . So as to give insight into the effects of solvation, relative Gibbs free energies are provided calculated in the



gas phase and while taking into account solvation effects for methanol solvent using the SMD model, and these are referred to as  $\Delta G_{\text{gas}}$  and  $\Delta G_{\text{soln}}$ , respectively. In every case, these numbers are presented with main, solution phase number first, and the gas phase value second, in parentheses.

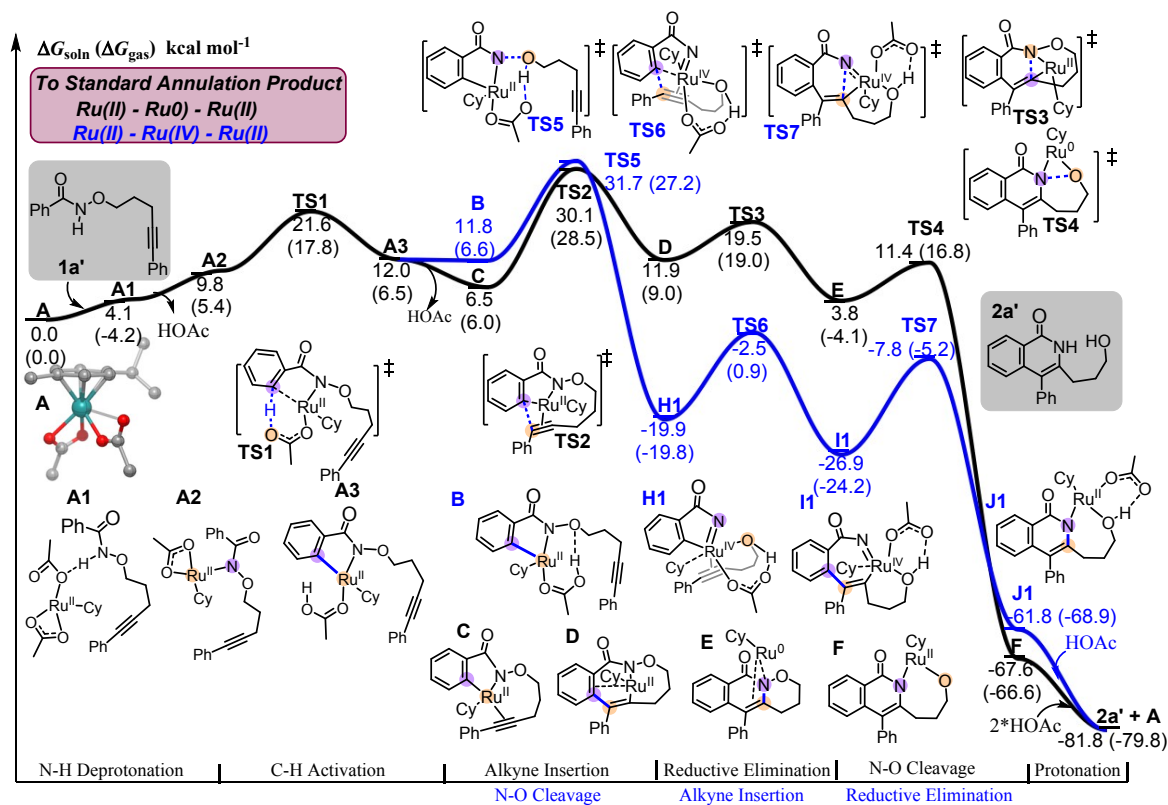

**Figure S2.** Two possible routes leading to the **standard annulation** product. Both the solution phase and gas phase (in parentheses) Gibbs free energies (in kcal mol<sup>-1</sup>) calculated at the B3LYP-D3/def2-TZVP (SMD: methanol) level are shown.

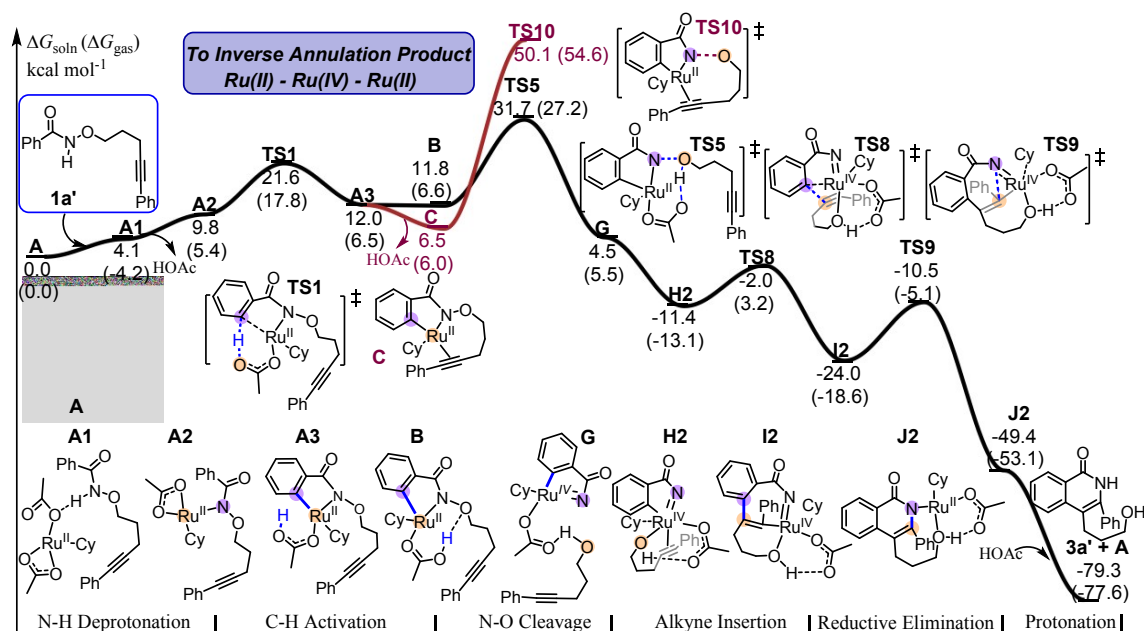

**Figure S3.** Calculated Gibbs free energy profile in gas phase (in parentheses) and solution phase for Ru-catalyzed **inverse annulation** reaction at the B3LYP-D3/def2-TZVP (SMD) level.

**High Energy Routes.** Our calculations support the mechanism initiated with the deprotonation of N-H occurring prior to C-H activation, since the pathway involving C-H activation occurring first involves a higher energy transition state (TS1a in Scheme S1).

We have considered several other possible reaction routes (below, Scheme S3 –S4) leading to the standard annulation product. In the traditional annulation mechanism with alkyne insertion occurring prior to N-O cleavage, alkyne insertion into the Ru-N bond preceding C-C reductive elimination (Scheme S3) is less facile and requires a higher barrier (35.4 kcal mol<sup>-1</sup>, TS12) than that for alkyne insertion into the Ru-C bond (30.1 kcal mol<sup>-1</sup>, TS2 in Figure S2). In addition, once the alkyne insertion into Ru-C bond is completed, the path with N-O oxidative cleavage prior to reductive elimination (Scheme S4) is calculated to be less favorable (TS13, 23.2 kcal mol<sup>-1</sup> vs 19.5 kcal mol<sup>-1</sup>, TS3).

In the newly proposed mechanism consisting of N-O cleavage occurring before alkyne insertion, we also examined the route involving N-O cleavage occurring prior to C-H activation (**Scheme S5**), and this route is found to be highly unfavorable due to a high-energy C-H activation transition state (**TS16**, 58.7 kcal mol<sup>-1</sup>). After N-O cleavage, alkyne insertion into Ru=N site is also found to be less favorable (10.7 kcal mol<sup>-1</sup>, **TS17** in **Scheme S6**) than insertion into Ru-C bond (**TS6** and **TS8**, -2.0 - -2.5 kcal mol<sup>-1</sup>).

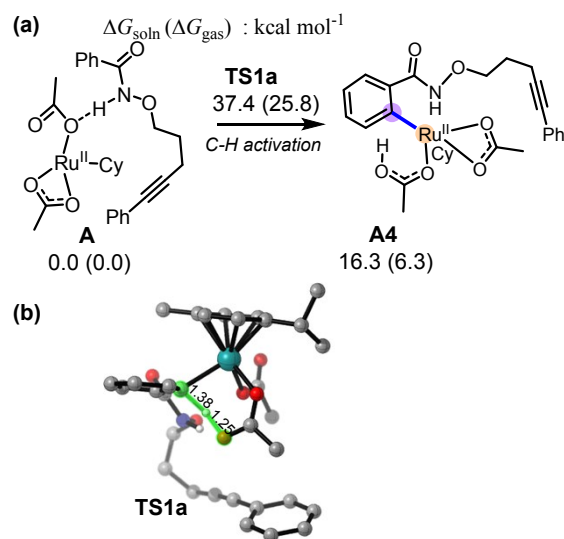

**Scheme S1.** (a) Schematic mechanism involving C-H activation prior to N-H deprotonation, with calculated Gibbs free energies (kcal mol<sup>-1</sup>) relative to overall reactants (values in parentheses are gas phase free energies). (b) Geometries of singlet **TS1a**. The barrier here is higher than the common pathway with N-H deprotonation occurring first.

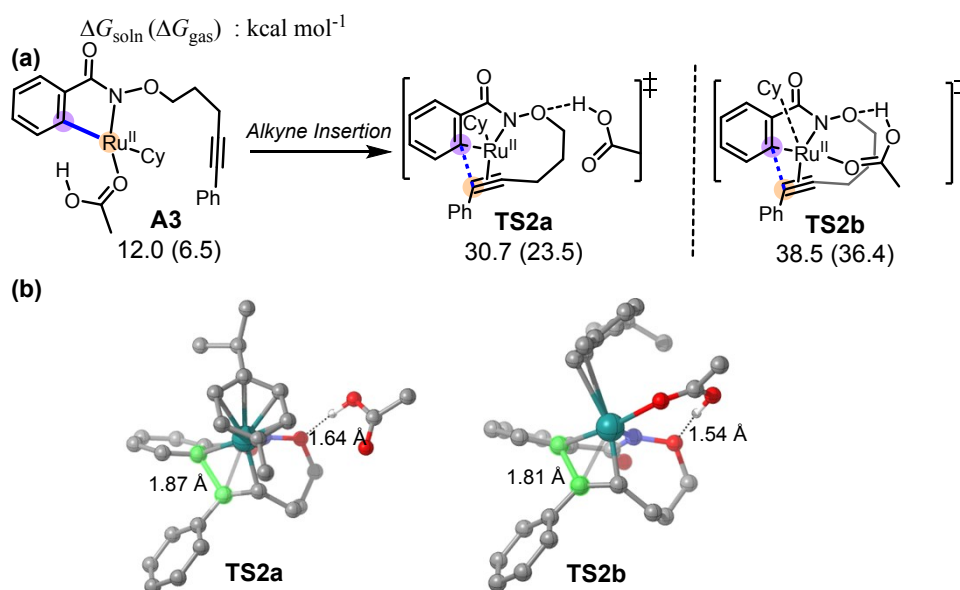

**Scheme S2.** (a) Schematic mechanism of the rate determining alkyne insertion step in presence of acetic acid, with calculated Gibbs free energies ( $\text{kcal mol}^{-1}$ ) relative to overall reactants (values in parentheses are gas phase free energies). The acetic acid is either coordinated (**TS2a**) or not coordinated to the metal (**TS2b**); (b) Geometries of singlet **TS2a** and **TS2b**. Our calculation shows that in the presence of acetic acid, alkyne insertion has a comparable barrier (**TS2a**; 30.7 kcal/mol) to the one in absence of acetic acid (**TS2**; 30.1 kcal/mol). Thus, alkyne insertion step is not sensitive to the presence of acetic acid.

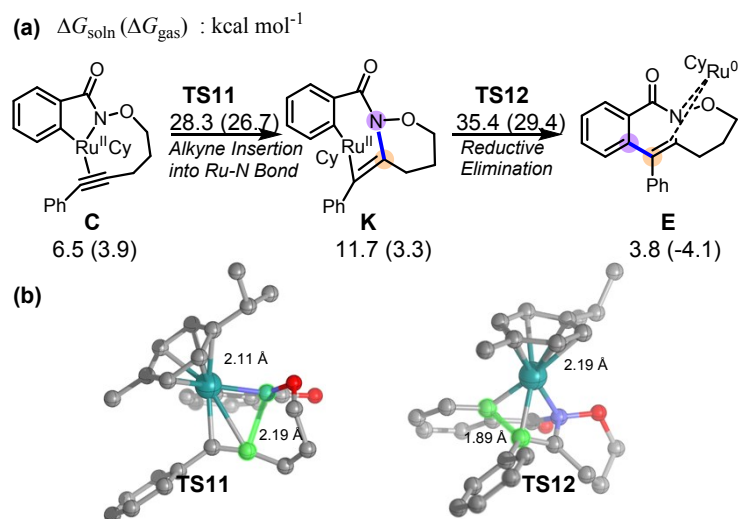

**Scheme S3.** (a) Schematic mechanism involving alkyne insertion into the Ru-N bond prior to the reductive elimination leading to the standard annulation product, with calculated Gibbs free energies

(kcal mol<sup>-1</sup>) relative to overall reactants (values in parentheses are gas phase free energies). (b) Geometries of singlet **TS11** and **TS12**.

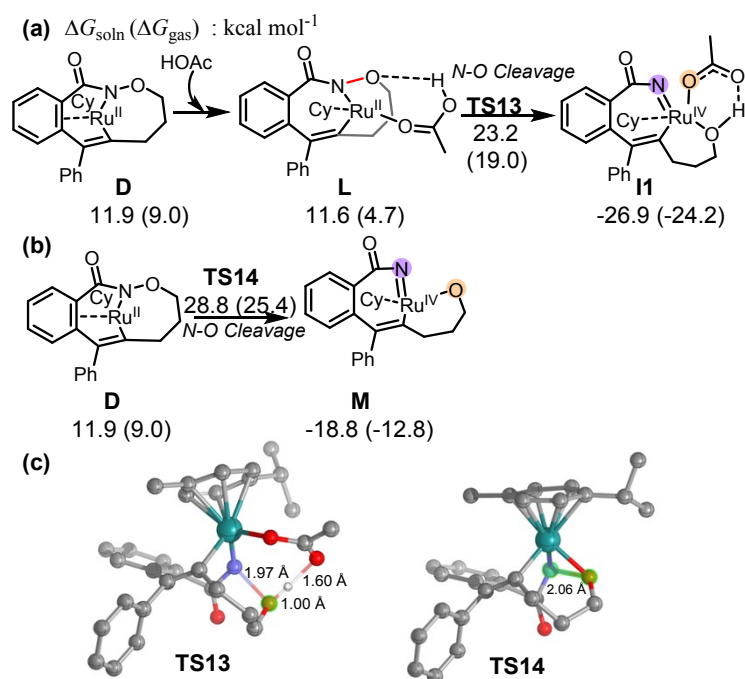

**Scheme S4.** Schematic mechanism involving N-O cleavage following alkyne insertion into the Ru-C bond in the (a) presence and (b) absence of metal-coordinated acetic acid, with calculated Gibbs free energies (kcal mol<sup>-1</sup>) relative to overall reactants (values in parentheses are gas phase free energies). (c) Geometries of singlet state **TS13** and **TS14**.

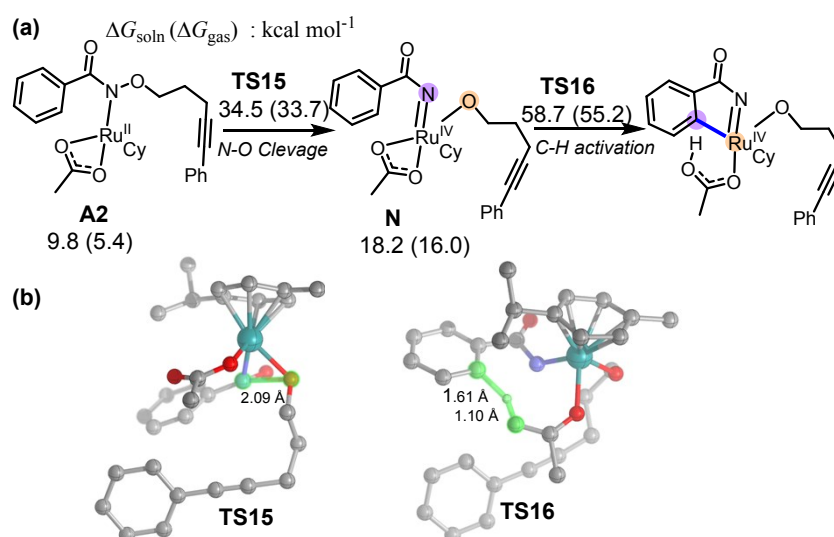

**Scheme S5.** (a) Schematic mechanism involving N-O cleavage prior to C-H activation, with calculated Gibbs free energies (kcal mol<sup>-1</sup>) relative to overall reactants (values in parentheses are gas phase free energies). (b) Geometries of singlet **TS15** and **TS16**.

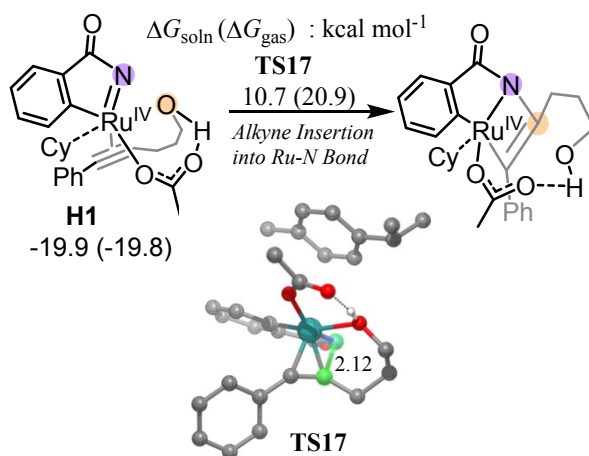

**Scheme S6.** Schematic mechanism involving alkyne insertion into the Ru=N bond after N-O cleavage, with calculated Gibbs free energies (kcal mol<sup>-1</sup>) relative to overall reactants (values in parentheses are gas phase free energies).

**Routes to the Inverse Annulation Product.** As discussed in the main text, N-O cleavage in the absence of HOAc assistance (direct cleavage) is significantly more unfavorable (>50.1 kcal mol<sup>-1</sup>, **TS10** in **Figure S3**) compared to the HOAc assisted process. In the direct cleavage process, two transition state isomers (**Scheme S7**) were located, one TS with alkyne coordination to the metal (**TS10**, 50.1 kcal mol<sup>-1</sup>) while the other does not have this interaction (**TS10b**, 52.0 kcal mol<sup>-1</sup>). Both of them show very high energies (>50.1 kcal mol<sup>-1</sup>), and their alkoxy oxygen atom displays considerable negative charge. However, with the assistance of the *in situ* generated HOAc, the barrier for N-O cleavage can be decreased to 31.7 kcal mol<sup>-1</sup> in solution (**TS5**, **Scheme S8**). The HOAc can either coordinate to the metal center and form a O-H...O hydrogen bond with the internal oxidizing N-O group (**TS5**), or dissociate from the metal center, but still preserve the hydrogen bond (**TS5b**). **TS5** is slightly favored by 0.5 kcal mol<sup>-1</sup> in energy over **TS5b**. In both TSs, the proton transfer to the N-O oxidizing site is almost complete and the negatively charged oxygen atom is largely neutralized.

We have considered the effect of one explicit methanol molecule in the N-O cleavage step. In absence of acetic acid, the methanol could also transfer its hydrogen to neutralize alkoxy oxygen atom of the substrate, and result into a negative methoxyl group (**TS5d**, **TS5e** in **Scheme 9**). However, the calculated barrier is much higher ( $>51.0$  kcal/mol) than the acetic acid assisted mechanism, which could be explained by the facile deprotonation of more acidic acetic acid, and stabilization of negative charge in the acetate. The methanol mediated proton transfer barrier is comparable to the barrier of direct N-O cleavage process (**TS10**), and experiments also found the reaction proceeds smoothly to the desired product with alcohol-free solvents (e.g., Acetone). Thus, the role of methanol could be excluded in the reaction.

Once N-O cleavage is finished, the subsequent reaction steps leading to the annulation product (alkyne insertion, reductive elimination and protonation) become much more facile, and their barriers are much lower than the N-O cleavage step. It can be noted that N-O cleavage (**TS5**) and alkyne insertion (**TS8**) TSs occur preferentially in the singlet state (**Scheme S10**), while the reductive elimination (**TS9**) step prefers the triplet state. In the main text and here, the presented Gibbs free energies refer to the lower spin state for that species or transition state. We assume that spin-state change, where needed, occurs faster than steps involving changes in chemical connectivity.

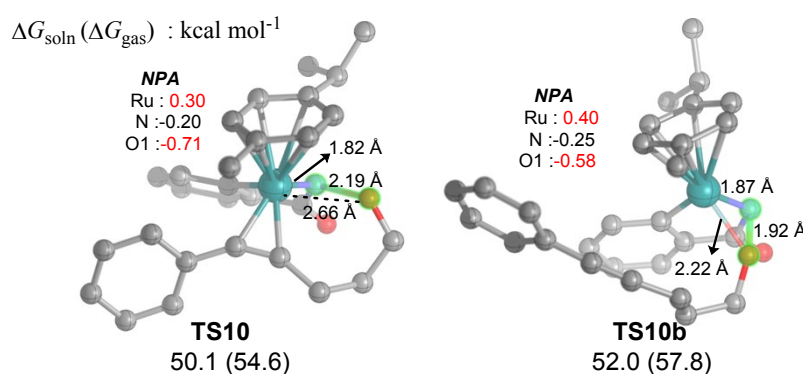

**Scheme S7.** Geometries and Gibbs free energies ( $\text{kcal mol}^{-1}$ ) of direct N-O cleavage transition states prior to alkyne insertion. NPA charge on key atoms are shown. Both the gas phase (in parentheses) and solution phase Gibbs free energies are shown.

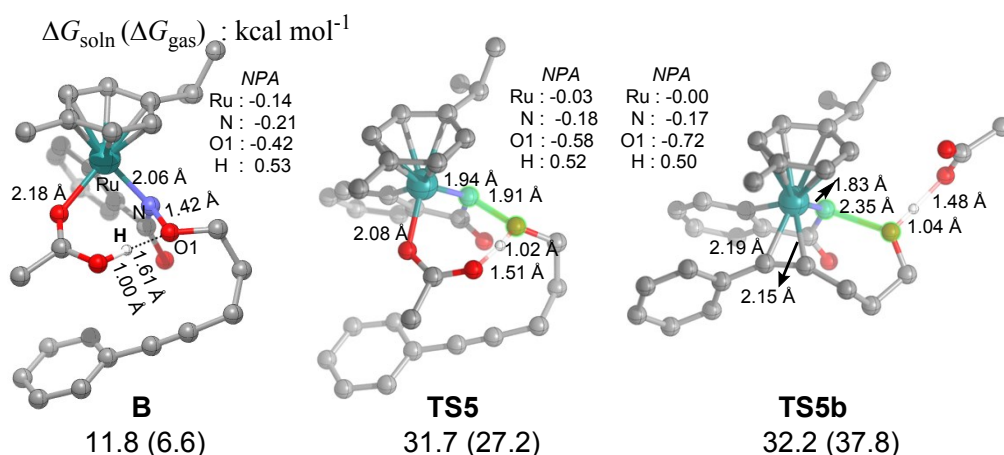

**Scheme S8.** Geometries and Gibbs free energies (kcal mol<sup>-1</sup>) of HOAc-assisted N-O cleavage transition states prior to alkyne insertion. Both the gas phase (in parentheses) and solution phase Gibbs free energies are shown.

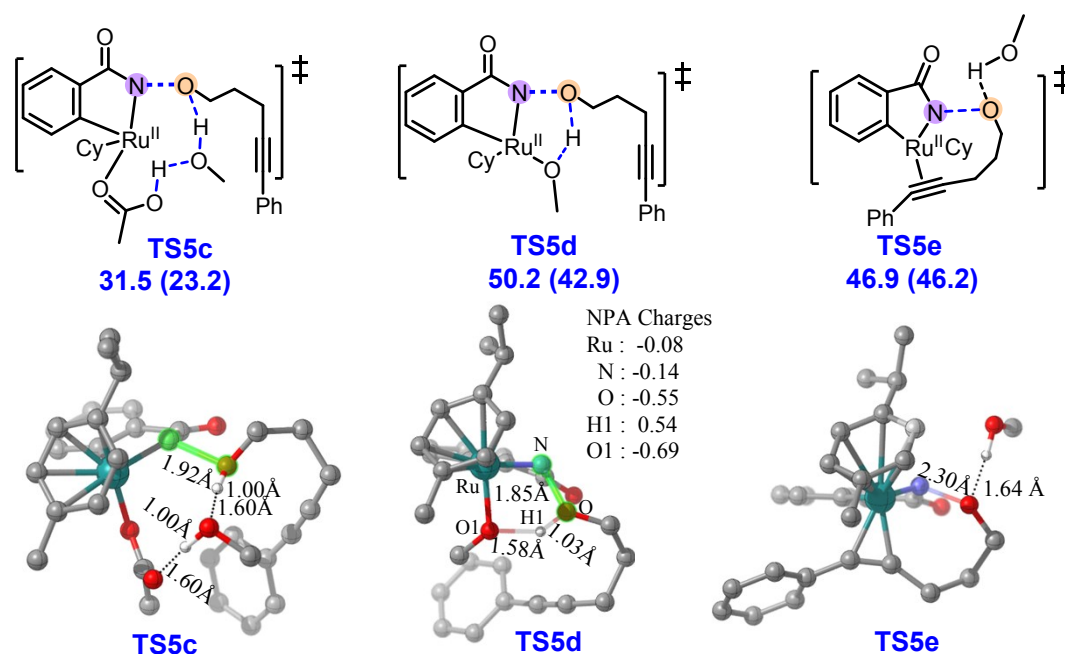

**Scheme S9.** The explicit effect of solvent (methanol) on the N-O cleavage transition state (**TS5**) in presence (**TS5c**) and absence (**TS5d** and **TS5e**) of acetic acid. Both the gas phase (in parentheses) and solution phase Gibbs free energies are shown. **TS5c** is the methanol mediated transition state of **TS5**, and **TS5c** has a comparable energy to **TS5**, indicating methanol plays a minor role in modulating the reaction mechanism. In absence of acetic acid, methanol is not efficient to enhance N-O bond cleavage,



and the barrier (**TS5d** and **TS5e**) is much higher than that of the acetic acid-mediated proton transfer mechanism.

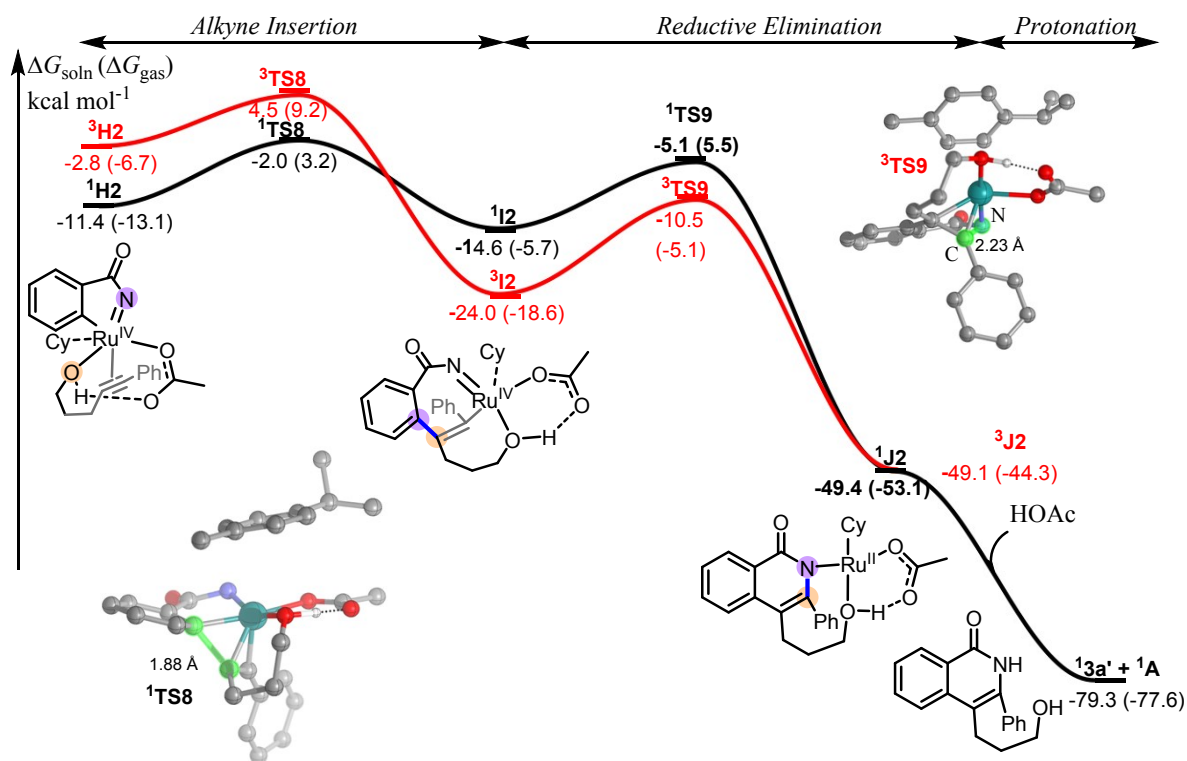

**Scheme S10.** Free energetic profile (kcal mol<sup>-1</sup>) of alkyne insertion followed by C-N reductive elimination and protonation to give the **inverse annulation product** at singlet and triplet state. Geometries of **1TS8** and **3TS9** are shown with the key bond lengths provided in Å. Both the gas phase (in parentheses) and solution phase Gibbs free energies are shown.

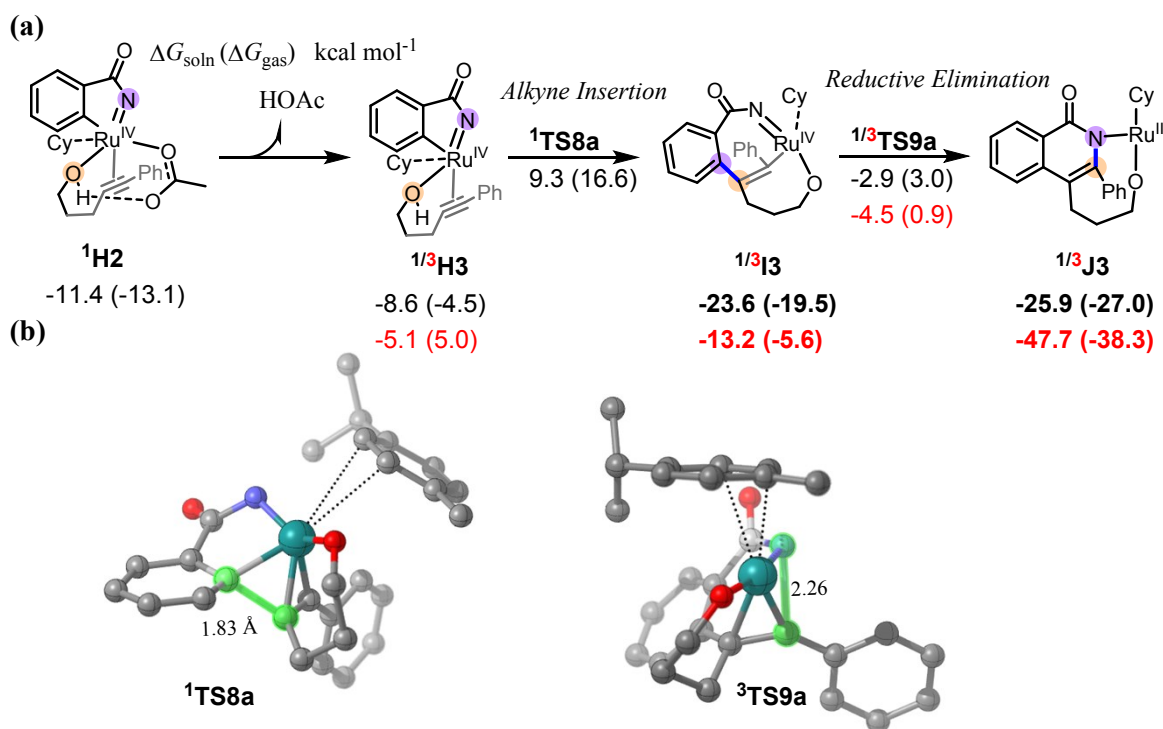

**Scheme S11.** Free energetic profile (kcal mol<sup>-1</sup>) of alkyne insertion followed by C-N reductive elimination and protonation to give the **inverse annulation product in absence of acetic acid** at singlet and triplet state. Geometries of **<sup>1</sup>TS8a** and **<sup>3</sup>TS9a** are shown with the key bond lengths provided in Å. Both the gas phase (in parentheses) and solution phase Gibbs free energies are shown.

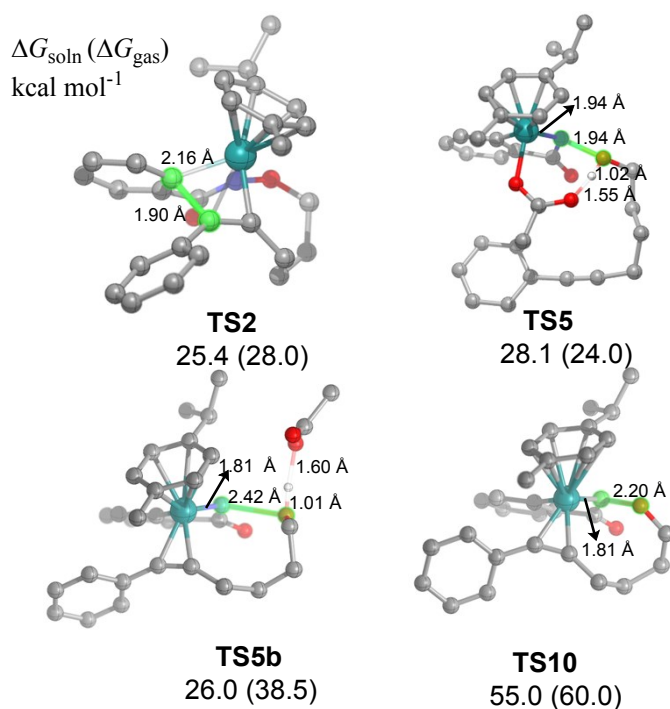

**Scheme S12.** Key transition states involved by using the **four-carbon-atom tethered substrate**. Note that the energy refers to the energy sum of the catalyst and substrate, and both the solution phase and gas phase (in parentheses) free energies are provided.

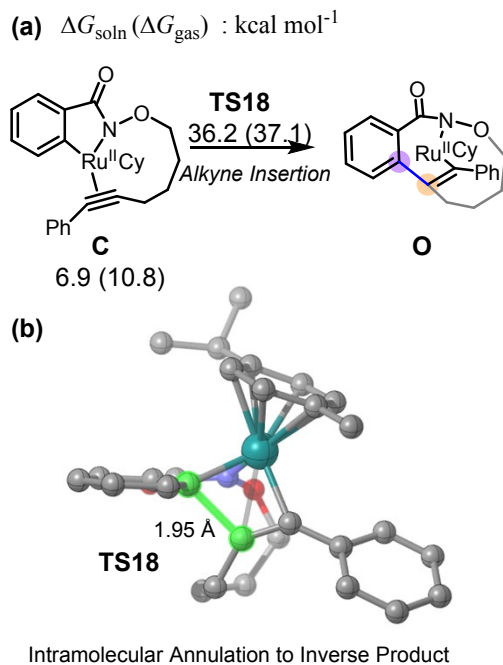

**Scheme S13.** Alkyne insertion transition state corresponding to the intramolecular annulation to inverse annulation product. The **four-carbon-atom tethered substrate** is used. Both the solution phase and gas

---

phase (in parentheses) free energies are provided. The barrier here is much higher than that of **TS2** (25.4 kcal/mol in **Scheme S12**) leading to the standard annulation product.

**Effect of DFT functionals.** To assess how DFT functionals affects the relative energies of different reaction mechanism, a series of DFT functionals including BP86-D3, BLYP-D3, B3LYP-D3, B3LYP\*-D3 (15 % HF), B3PW91-D3, PBE0-D3, TPSSh-D3,  $\omega$ b97xd, M06-D3, M06L-D3 and M11-L (**Table S2**), were applied in the SMD single point energy calculation of **TS2** (Alkyne insertion step in the traditional annulation mechanism) and **TS5/TS5b** (N-O cleavage step in the newly proposed reaction mechanism). Note that for B3LYP\*, we have used the dispersion correction with parameters optimized for B3LYP. The current results show that BP86-D3, BLYP-D3, B3LYP-D3, B3LYP\*-D3 and M06L-D3 predicted somewhat comparable reaction barriers for **TS2** and **TS5**, while B3PW91-D3, PBE0-D3,  $\omega$ b97xd, TPSSh-D3, M06-D3 predict that **TS2** is much lower in energy than **TS5**. The sensitivity of the computed relative energies of **TS5** to the functional seems to be associated with the change in oxidation state of the metal associated with the N-O bond cleavage occurring in this step.

In the absence of a through benchmarking exercise, it is not immediately obvious which functional gives the most accurate values. However, here we can rely on a key experimental observation to rule out some functionals. Experiments clearly show formation of the inverse annulation product, which cannot be formed following the traditional mechanism. Hence the new **TS5** must be competitive with **TS2**, unlike what is calculated with B3PW91-D3, PBE0-D3,  $\omega$ b97xd, TPSSh-D3, and M06-D3. For these reasons, we prefer to trust the B3LYP-D3 results, which yield comparable barrier heights for **TS2** and **TS5**.

**Table S2.** Solution phase Gibbs free energies in kcal mol<sup>-1</sup> of **TS2** (alkyne insertion in the traditional mechanism), **TS5** and **TS5b** (HOAc assisted N-O cleavage). The SMD solvation energies are calculated with different DFT methods with def2-TZVP basis set, while the free energy correction calculated at the B3LYP-D3/def2-TZVP level.

|             | B3LYP-D3  | B3LYP*-<br>D3 <sup>a</sup> | BLYP-D3  | M06L-D3        | M11L    | BP86-D3 |
|-------------|-----------|----------------------------|----------|----------------|---------|---------|
| <b>TS2</b>  | 30.0      | 27.0                       | 25.1     | 33.7           | 32.3    | 11.5    |
| <b>TS5</b>  | 31.7      | 28.3                       | 19.1     | 36.8           | 37.9    | 17.1    |
| <b>TS5b</b> | 32.0      | 28.5                       | 17.3     | 40.0           | 45.4    | 14.9    |
|             | B3PW91-D3 | M06-D3                     | TPSSh-D3 | $\omega$ b97xd | PBE0-D3 |         |
| <b>TS2</b>  | 16.7      | 23.6                       | 22.6     | 25.5           | 20.0    |         |
| <b>TS5</b>  | 29.9      | 33.5                       | 31.9     | 42.2           | 36.5    |         |
| <b>TS5b</b> | 28.9      | 35.4                       | 33.6     | 39.2           | 37.5    |         |

a. 15% HF exchange

**Table S3.** Relative electronic energy and Gibbs free energies (kcal/mol) in gas phase and SMD solution (methanol).  $\Delta G_{\text{gas}}$  and  $\Delta G_{\text{sol}}$  denotes to the gas phase and solution phase Gibbs energies applied the standard state correction.

|                      | $\Delta E$ | $\Delta E(\text{SMD})$ | $\Delta G_{\text{gas}}^*$ | $\Delta G_{\text{gas}}$ | $\Delta G_{\text{soln}}^*$ | $\Delta G_{\text{soln}}$ |
|----------------------|------------|------------------------|---------------------------|-------------------------|----------------------------|--------------------------|
| <b><sup>1</sup>A</b> | 0.0        | 0.0                    | 0.0                       | 0.0                     | 0.0                        | 0.0                      |
| <b><sup>3</sup>A</b> | 26.3       | 21.5                   | 23.9                      | 23.9                    | 19.1                       | 19.1                     |
| <b>2a'</b>           | -85.2      | -87.3                  | -79.8                     | -79.8                   | -81.8                      | -81.8                    |
| <b>3a'</b>           | -83.2      | -84.9                  | -77.6                     | -77.6                   | -79.3                      | -79.3                    |

#### *N-H/C-H Activation*

---

|                        |       |       |      |      |      |      |
|------------------------|-------|-------|------|------|------|------|
| <b><sup>1</sup>A1</b>  | -20.8 | -12.4 | -2.1 | -4.2 | 6.2  | 4.1  |
| <b><sup>3</sup>A1</b>  | 5.6   | 8.7   | 22.3 | 20.2 | 25.4 | 23.3 |
| <b><sup>1</sup>A2</b>  | -1.3  | 3.1   | 5.4  | 5.4  | 9.8  | 9.8  |
| <b><sup>3</sup>A2</b>  | 18.2  | 19.7  | 21.7 | 21.7 | 23.2 | 23.2 |
| <b><sup>1</sup>TS1</b> | 16.3  | 20.1  | 17.8 | 17.8 | 21.6 | 21.6 |
| <b><sup>3</sup>TS1</b> | 41.5  | 45.5  | 39.4 | 39.4 | 43.4 | 43.4 |
| <b><sup>1</sup>A3</b>  | 1.7   | 7.2   | 6.5  | 6.5  | 12.0 | 12.0 |
| <b><sup>1</sup>B</b>   | 2.4   | 7.6   | 6.6  | 6.6  | 11.8 | 11.8 |
| <b><sup>1</sup>C</b>   | 10.5  | 11.0  | 3.9  | 6.0  | 4.4  | 6.5  |
| <b><sup>3</sup>C</b>   | 25.8  | 23.4  | 14.8 | 16.9 | 12.4 | 14.5 |

***To Standard Annulation : Traditional Mechanism***

|                         |      |      |      |      |      |      |
|-------------------------|------|------|------|------|------|------|
| <b><sup>1</sup>TS2</b>  | 31.6 | 33.2 | 26.4 | 28.5 | 28.0 | 30.1 |
| <b><sup>3</sup>TS2</b>  | 60.6 | 60.4 | 50.1 | 52.2 | 49.9 | 52.0 |
| <b><sup>1</sup>TS2a</b> | 17.4 | 24.6 | 23.5 | 23.5 | 30.7 | 30.7 |
| <b><sup>1</sup>TS2b</b> | 31.6 | 33.7 | 36.4 | 36.4 | 38.5 | 38.5 |
| <b><sup>1</sup>D</b>    | 12.2 | 15.2 | 6.9  | 9.0  | 9.8  | 11.9 |

---

|                        |       |       |       |       |       |       |
|------------------------|-------|-------|-------|-------|-------|-------|
| <b><sup>3</sup>D</b>   | 28.3  | 28.0  | 19.1  | 21.2  | 18.8  | 20.9  |
| <b><sup>1</sup>TS3</b> | 23.1  | 23.7  | 16.9  | 19.0  | 17.4  | 19.5  |
| <b><sup>3</sup>TS3</b> | 47.6  | 48.8  | 38.8  | 40.9  | 40.0  | 42.2  |
| <b><sup>1</sup>E</b>   | -1.6  | 6.3   | -6.2  | -4.1  | 1.7   | 3.8   |
| <b><sup>3</sup>E</b>   | 11.6  | 12.9  | 4.5   | 6.6   | 5.8   | 7.9   |
| <b><sup>1</sup>TS4</b> | 23.1  | 17.8  | 14.7  | 16.8  | 9.3   | 11.4  |
| <b><sup>1</sup>F</b>   | -62.9 | -64.0 | -68.7 | -66.6 | -69.7 | -67.6 |
| <b><sup>3</sup>F</b>   | -45.8 | -46.7 | -53.8 | -51.7 | -54.6 | -52.5 |

*Novel Mechanism: HOAc assisted N-O Cleavage*

|                         |      |      |      |      |      |      |
|-------------------------|------|------|------|------|------|------|
| <b><sup>1</sup>TS5</b>  | 24.9 | 29.4 | 27.2 | 27.2 | 31.7 | 31.7 |
| <b><sup>1</sup>TS5b</b> | 36.7 | 31.1 | 37.8 | 37.8 | 32.2 | 32.2 |
| <b><sup>1</sup>TS5c</b> | 8.8  | 17.1 | 25.3 | 23.2 | 33.6 | 31.5 |
| <b><sup>1</sup>G</b>    | 4.3  | 3.3  | 5.5  | 5.5  | 4.5  | 4.5  |

*Higher Energy Route: Methanol assisted N-O Cleavage*

|                         |      |      |      |      |      |      |
|-------------------------|------|------|------|------|------|------|
| <b><sup>1</sup>TS5d</b> | 41.3 | 48.7 | 42.9 | 42.9 | 50.2 | 50.2 |
| <b><sup>1</sup>TS5e</b> | 46.2 | 46.9 | 46.2 | 46.2 | 46.9 | 46.9 |

---

*Novel Mechanism: To Standard Annulation*

|                        |       |       |       |       |       |       |
|------------------------|-------|-------|-------|-------|-------|-------|
| <b><sup>1</sup>H1</b>  | -21.1 | -21.2 | -19.8 | -19.8 | -19.9 | -19.9 |
| <b><sup>1</sup>TS6</b> | -0.9  | -4.3  | 0.9   | 0.9   | -2.5  | -2.5  |
| <b><sup>3</sup>TS6</b> | 3.1   | 3.6   | 4.7   | 4.7   | 5.1   | 5.1   |
| <b><sup>1</sup>I1</b>  | -27.7 | -30.4 | -24.2 | -24.2 | -26.9 | -26.9 |
| <b><sup>3</sup>I1</b>  | -26.5 | -27.7 | -23.3 | -23.3 | -24.6 | -24.6 |
| <b><sup>1</sup>TS7</b> | -1.7  | -5.0  | 1.2   | 1.2   | -2.0  | -2.0  |
| <b><sup>3</sup>TS7</b> | -6.7  | -9.3  | -5.2  | -5.2  | -7.8  | -7.8  |
| <b><sup>1</sup>J1</b>  | -78.9 | -71.8 | -68.9 | -68.9 | -61.8 | -61.8 |

*Novel Mechanism: To Inverse Annulation*

|                        |       |       |       |       |       |       |
|------------------------|-------|-------|-------|-------|-------|-------|
| <b><sup>1</sup>H2</b>  | -14.2 | -12.5 | -13.1 | -13.1 | -11.4 | -11.4 |
| <b><sup>3</sup>H2</b>  | -9.2  | -5.3  | -6.7  | -6.7  | -2.8  | -2.8  |
| <b><sup>1</sup>TS8</b> | 0.4   | -4.8  | 3.2   | 3.2   | -2.0  | -2.0  |
| <b><sup>3</sup>TS8</b> | 7.2   | 2.5   | 9.2   | 9.2   | 4.5   | 4.5   |
| <b><sup>1</sup>I2</b>  | -9.8  | -18.8 | -5.7  | -5.7  | -14.6 | -14.6 |
| <b><sup>3</sup>I2</b>  | -21.0 | -26.4 | -18.6 | -18.6 | -24.0 | -24.0 |



---

|                                  |        |        |        |        |        |        |
|----------------------------------|--------|--------|--------|--------|--------|--------|
| <b><sup>1</sup>TS9</b>           | 0.8    | -9.8   | 5.5    | 5.5    | -5.1   | -5.1   |
| <b><sup>3</sup>TS9</b>           | -6.6   | -12.0  | -5.1   | -5.1   | -10.5  | -10.5  |
| <b><sup>1</sup>J2</b>            | -63.1  | -59.3  | -53.1  | -53.1  | -49.4  | -49.4  |
| <b><sup>3</sup>J2</b>            | -49.5  | -54.3  | -44.3  | -44.3  | -49.1  | -49.1  |
| <b><sup>1</sup>H3</b>            | 4.26   | 0.13   | -6.60  | -4.49  | -10.74 | -8.62  |
| <b><sup>3</sup>H3</b>            | 16.41  | 6.31   | 2.90   | 5.02   | -7.20  | -5.08  |
| <b><sup>1</sup>TS8a</b>          | 25.85  | 18.51  | 14.47  | 16.58  | 7.13   | 9.25   |
| <b><sup>1</sup>I3</b>            | -11.10 | -15.28 | -21.57 | -19.46 | -25.76 | -23.64 |
| <b><sup>3</sup>I3</b>            | 4.79   | -2.87  | -7.70  | -5.58  | -15.35 | -13.23 |
| <b><sup>1</sup>TS9a</b>          | 11.81  | 5.88   | 0.88   | 2.99   | -5.05  | -2.93  |
| <b><sup>3</sup>TS9a</b>          | 11.10  | 5.75   | -1.22  | 0.89   | -6.57  | -4.45  |
| <b><sup>1</sup>J3</b>            | -22.98 | -21.87 | -29.16 | -27.04 | -28.05 | -25.93 |
| <b><sup>3</sup>J3</b>            | -32.62 | -42.03 | -40.41 | -38.29 | -49.82 | -47.70 |
| <b><i>High Energy Routes</i></b> |        |        |        |        |        |        |
| <b><sup>1</sup>TS10</b>          | 65.1   | 60.6   | 52.5   | 54.6   | 48.0   | 50.1   |
| <b><sup>1</sup>TS10b</b>         | 66.5   | 60.7   | 55.7   | 57.8   | 49.9   | 52.0   |

---

|                         |      |       |       |       |       |       |
|-------------------------|------|-------|-------|-------|-------|-------|
| <b><sup>1</sup>TS11</b> | 31.6 | 33.1  | 24.6  | 26.7  | 26.2  | 28.3  |
| <b><sup>3</sup>TS11</b> | 65.4 | 68.3  | 54.2  | 56.3  | 57.2  | 59.3  |
| <b><sup>1</sup>K</b>    | 7.7  | 16.1  | 1.2   | 3.3   | 9.6   | 11.7  |
| <b><sup>3</sup>K</b>    | 34.1 | 35.0  | 24.3  | 26.4  | 25.2  | 27.4  |
| <b><sup>1</sup>TS12</b> | 34.2 | 40.3  | 27.3  | 29.4  | 33.3  | 35.4  |
| <b><sup>3</sup>TS12</b> | 59.3 | 64.2  | 50.3  | 52.4  | 55.2  | 57.3  |
| <b><sup>1</sup>L</b>    | -3.9 | 3.0   | 4.7   | 4.7   | 11.6  | 11.6  |
| <b><sup>1</sup>TS13</b> | 10.7 | 14.9  | 19.0  | 19.0  | 23.2  | 23.2  |
| <b><sup>1</sup>TS14</b> | 32.1 | 35.5  | 23.3  | 25.4  | 26.7  | 28.8  |
| <b><sup>1</sup>M</b>    | -4.1 | -10.1 | -14.9 | -12.8 | -20.9 | -18.8 |
| <b><sup>3</sup>M</b>    | 5.1  | -4.7  | -6.8  | -4.7  | -16.7 | -14.5 |
| <b><sup>1</sup>TS15</b> | 31.2 | 32.0  | 33.7  | 33.7  | 34.5  | 34.5  |
| <b><sup>1</sup>N</b>    | 12.8 | 15.1  | 16.0  | 16.0  | 18.2  | 18.2  |
| <b><sup>1</sup>TS16</b> | 56.3 | 59.8  | 55.2  | 55.2  | 58.7  | 58.7  |
| <b><sup>1</sup>TS17</b> | 18.5 | 8.3   | 20.9  | 20.9  | 10.7  | 10.7  |

---

Four Carbon Tethered Substrate

---

|                         |       |       |       |       |       |       |
|-------------------------|-------|-------|-------|-------|-------|-------|
| <b>2a</b>               | -89.1 | -89.9 | -83.9 | -83.9 | -84.7 | -84.7 |
| <b>3a</b>               | -83.5 | -85.1 | -77.7 | -77.7 | -79.4 | -79.4 |
| <b><sup>1</sup>A1</b>   | -23.3 | -17.7 | -3.8  | -5.9  | 1.8   | -0.3  |
| <b><sup>1</sup>TS2</b>  | 32.9  | 30.2  | 25.9  | 28.0  | 23.3  | 25.4  |
| <b><sup>1</sup>TS5</b>  | 20.0  | 24.1  | 24.0  | 24.0  | 28.1  | 28.1  |
| <b><sup>1</sup>TS5b</b> | 37.1  | 24.5  | 38.5  | 38.5  | 26.0  | 26.0  |
| <b><sup>1</sup>TS10</b> | 70.0  | 65.0  | 57.9  | 60.0  | 52.9  | 55.0  |
| <b><sup>1</sup>TS18</b> | 41.4  | 40.4  | 35.0  | 37.1  | 34.0  | 36.1  |

**Table S4.** Absolute electronic energy (au) and Gibbs free energies in gas phase and SMD solution phase (methanol).

|                      | $E$          | $E(\text{SMD})$ | $G^*_{\text{gas}}$ | $G^*_{\text{soln}}$ |
|----------------------|--------------|-----------------|--------------------|---------------------|
| <b>1a'</b>           | -901.6250692 | -901.653414     | -901.369214        | -901.397559         |
| <b>HOAc</b>          | -229.1923909 | -229.20254      | -229.158117        | -229.168266         |
| <b><sup>1</sup>A</b> | -941.8698302 | -941.902918     | -941.605096        | -941.638184         |
| <b><sup>3</sup>A</b> | -941.8278435 | -941.868566     | -941.566907        | -941.60763          |
| <b>2a'</b>           | -901.7609146 | -901.792521     | -901.496382        | -901.527989         |

---

|                         |              |              |              |              |
|-------------------------|--------------|--------------|--------------|--------------|
| <b>3a'</b>              | -901.7576685 | -901.788703  | -901.492876  | -901.52391   |
| <b><sup>1</sup>A1</b>   | -1843.527981 | -1843.57608  | -1842.977724 | -1843.02583  |
| <b><sup>3</sup>A1</b>   | -1843.485928 | -1843.54244  | -1842.938724 | -1842.99523  |
| <b><sup>1</sup>A2</b>   | -1614.304571 | -1614.34892  | -1613.807541 | -1613.85189  |
| <b><sup>3</sup>A2</b>   | -1614.273455 | -1614.32247  | -1613.781567 | -1613.83058  |
| <b><sup>1</sup>TS1</b>  | -1614.276591 | -1614.3218   | -1613.787804 | -1613.83301  |
| <b><sup>3</sup>TS1</b>  | -1614.236352 | -1614.28131  | -1613.753343 | -1613.7983   |
| <b><sup>1</sup>A3</b>   | -1614.299793 | -1614.34231  | -1613.805914 | -1613.84843  |
| <b><sup>1</sup>B</b>    | -1614.298729 | -1614.3417   | -1613.805662 | -1613.84863  |
| <b><sup>1</sup>C</b>    | -1385.093345 | -1385.13374  | -1384.651845 | -1384.69224  |
| <b><sup>3</sup>C</b>    | -1385.068946 | -1385.11396  | -1384.634463 | -1384.67947  |
| <b><sup>1</sup>TS2</b>  | -1385.059701 | -1385.09837  | -1384.61596  | -1384.65463  |
| <b><sup>3</sup>TS2</b>  | -1385.013494 | -1385.05498  | -1384.57818  | -1384.61966  |
| <b><sup>1</sup>TS2a</b> | -1614.274738 | -1614.314669 | -1613.778669 | -1613.8186   |
| <b><sup>1</sup>TS2b</b> | -1614.252111 | -1614.300051 | -1613.758185 | -1613.806125 |
| <b><sup>1</sup>D</b>    | -1385.090616 | -1385.1271   | -1384.647099 | -1384.68359  |
| <b><sup>3</sup>D</b>    | -1385.064973 | -1385.10661  | -1384.627583 | -1384.66922  |
| <b><sup>1</sup>TS3</b>  | -1385.07328  | -1385.11355  | -1384.631204 | -1384.67147  |
| <b><sup>3</sup>TS3</b>  | -1385.034217 | -1385.07343  | -1384.596177 | -1384.63539  |
| <b><sup>1</sup>E</b>    | -1385.112676 | -1385.14125  | -1384.667974 | -1384.69655  |

---

|                   |              |             |              |             |
|-------------------|--------------|-------------|--------------|-------------|
| <sup>3</sup> E    | -1385.091626 | -1385.13075 | -1384.650847 | -1384.68997 |
| <sup>1</sup> TS4  | -1385.0733   | -1385.12296 | -1384.634717 | -1384.68438 |
| <sup>1</sup> F    | -1385.210402 | -1385.25328 | -1384.767481 | -1384.81036 |
| <sup>3</sup> F    | -1385.183054 | -1385.22562 | -1384.743735 | -1384.7863  |
| <sup>1</sup> TS5  | -1614.262876 | -1614.30698 | -1613.772912 | -1613.81701 |
| <sup>1</sup> TS5b | -1614.244079 | -1614.30431 | -1613.755899 | -1613.81613 |
| <sup>1</sup> TS5c | -1730.065302 | -1730.1113  | -1729.524472 | -1729.57047 |
| <sup>1</sup> TS5d | -1500.82102  | -1500.85842 | -1500.338302 | -1500.37571 |
| <sup>1</sup> TS5e | -1500.813236 | -1500.86126 | -1500.333025 | -1500.38105 |
| <sup>1</sup> G    | -1614.295685 | -1614.34855 | -1613.807496 | -1613.86036 |
| <sup>1</sup> H1   | -1614.33608  | -1614.38763 | -1613.847708 | -1613.89926 |
| <sup>1</sup> TS6  | -1614.304018 | -1614.36071 | -1613.814747 | -1613.87144 |
| <sup>3</sup> TS6  | -1614.297565 | -1614.34812 | -1613.808748 | -1613.8593  |
| <sup>1</sup> I1   | -1614.346674 | -1614.40219 | -1613.854823 | -1613.91034 |
| <sup>3</sup> I1   | -1614.344664 | -1614.39797 | -1613.853314 | -1613.90662 |
| <sup>1</sup> TS7  | -1614.305289 | -1614.36175 | -1613.814234 | -1613.8707  |
| <sup>3</sup> TS7  | -1614.313185 | -1614.36861 | -1613.824469 | -1613.8799  |
| <sup>1</sup> J1   | -1614.428307 | -1614.46825 | -1613.92596  | -1613.96591 |
| <sup>1</sup> H2   | -1614.325066 | -1614.37363 | -1613.837003 | -1613.88557 |
| <sup>3</sup> H2   | -1614.317092 | -1614.36224 | -1613.826822 | -1613.87197 |

---

|                          |              |              |              |             |
|--------------------------|--------------|--------------|--------------|-------------|
| <b><sup>1</sup>TS8</b>   | -1614.301842 | -1614.36139  | -1613.811047 | -1613.8706  |
| <b><sup>3</sup>TS8</b>   | -1614.291068 | -1614.34982  | -1613.801494 | -1613.86024 |
| <b><sup>1</sup>I2</b>    | -1614.318185 | -1614.38379  | -1613.825198 | -1613.8908  |
| <b><sup>3</sup>I2</b>    | -1614.336011 | -1614.39587  | -1613.845795 | -1613.90565 |
| <b><sup>1</sup>TS9</b>   | -1614.301213 | -1614.36943  | -1613.807413 | -1613.87563 |
| <b><sup>3</sup>TS9</b>   | -1614.312991 | -1614.37292  | -1613.824356 | -1613.88428 |
| <b><sup>1</sup>J2</b>    | -1614.402991 | -1614.44836  | -1613.900859 | -1613.94623 |
| <b><sup>3</sup>J2</b>    | -1614.381361 | -1614.44037  | -1613.886738 | -1613.94575 |
| <b><sup>1</sup>H3</b>    | -1385.103331 | -1385.151052 | -1384.6686   | -1384.71632 |
| <b><sup>3</sup>H3</b>    | -1385.083965 | -1385.141198 | -1384.65346  | -1384.71069 |
| <b><sup>1</sup>TS8a</b>  | -1385.068926 | -1385.121748 | -1384.63502  | -1384.68785 |
| <b><sup>1</sup>I3</b>    | -1385.127805 | -1385.17561  | -1384.69245  | -1384.74026 |
| <b><sup>3</sup>I3</b>    | -1385.102484 | -1385.155819 | -1384.67034  | -1384.72367 |
| <b><sup>1</sup>TS9a</b>  | -1385.091302 | -1385.141876 | -1384.65668  | -1384.70725 |
| <b><sup>3</sup>TS9a</b>  | -1385.092436 | -1385.142088 | -1384.66003  | -1384.70968 |
| <b><sup>1</sup>J3</b>    | -1385.146745 | -1385.186106 | -1384.70455  | -1384.74391 |
| <b><sup>3</sup>J3</b>    | -1385.162099 | -1385.218229 | -1384.72248  | -1384.77861 |
| <b><sup>1</sup>TS10</b>  | -1385.006388 | -1385.05471  | -1384.57442  | -1384.62274 |
| <b><sup>1</sup>TS10b</b> | -1385.004194 | -1385.05458  | -1384.569295 | -1384.61968 |
| <b><sup>1</sup>TS11</b>  | -1385.059802 | -1385.09849  | -1384.618812 | -1384.6575  |

---

|                   |              |             |              |             |
|-------------------|--------------|-------------|--------------|-------------|
| <sup>3</sup> TS11 | -1385.005887 | -1385.04235 | -1384.57166  | -1384.60812 |
| <sup>1</sup> K    | -1385.09791  | -1385.12564 | -1384.656155 | -1384.68388 |
| <sup>3</sup> K    | -1385.055829 | -1385.09553 | -1384.619286 | -1384.65898 |
| <sup>1</sup> TS12 | -1385.055537 | -1385.08706 | -1384.614604 | -1384.64612 |
| <sup>3</sup> TS12 | -1385.015626 | -1385.04901 | -1384.577886 | -1384.61127 |
| <sup>1</sup> L    | -1614.308692 | -1614.34908 | -1613.808665 | -1613.84906 |
| <sup>1</sup> TS13 | -1614.285499 | -1614.33002 | -1613.785914 | -1613.83044 |
| <sup>1</sup> TS14 | -1385.059035 | -1385.09471 | -1384.620963 | -1384.65664 |
| <sup>1</sup> M    | -1385.116705 | -1385.16739 | -1384.681875 | -1384.73256 |
| <sup>3</sup> M    | -1385.101975 | -1385.15877 | -1384.668972 | -1384.72577 |
| <sup>1</sup> TS15 | -1614.252824 | -1614.30278 | -1613.762547 | -1613.81251 |
| <sup>1</sup> N    | -1614.282041 | -1614.32978 | -1613.790696 | -1613.83844 |
| <sup>1</sup> TS16 | -1614.212802 | -1614.25855 | -1613.728156 | -1613.77391 |
| <sup>1</sup> TS17 | -1614.273018 | -1614.34058 | -1613.782918 | -1613.85048 |

---

**Four-carbon-atom tether substrate**

---

|                  |              |             |              |             |
|------------------|--------------|-------------|--------------|-------------|
| <b>1a</b>        | -940.9560841 | -940.98261  | -940.672712  | -940.699238 |
| <b>2a</b>        | -941.0980123 | -941.125892 | -940.806347  | -940.834227 |
| <b>3a</b>        | -941.0891028 | -941.11829  | -940.796603  | -940.82579  |
| <sup>1</sup> A1  | -1882.862993 | -1882.91367 | -1882.283858 | -1882.33453 |
| <sup>1</sup> TS2 | -1424.388711 | -1424.43225 | -1423.92028  | -1423.96382 |

---

|                   |              |             |              |             |
|-------------------|--------------|-------------|--------------|-------------|
| <sup>1</sup> TS5  | -1653.601672 | -1653.64452 | -1653.081452 | -1653.1243  |
| <sup>1</sup> TS5b | -1653.574376 | -1653.6439  | -1653.058273 | -1653.12779 |
| <sup>1</sup> TS10 | -1424.329657 | -1424.37692 | -1423.869293 | -1423.91655 |
| <sup>1</sup> TS18 | -1424.37519  | -1424.416   | -1423.905822 | -1423.94663 |

---

## 7. References

1. J. He, Y. Shi, W. Cheng, Z. Man, D. Yang, C.-Y. Li, *Angew. Chem. Int. Ed.* **2016**, *55*, 4557-4561.
2. J. Ozawa, M. Tashiro, J. Ni, K. Oisaki, M. Kanai, *Chem. Sci.*, **2016**, *7*, 1904-1909
3. X. Xu, Y. Liu, C. M. Park, *Angew. Chem. Int. Ed.* **2012**, *51*, 9372-9376.
4. CrysAlis PRO (2012). Agilent Technologies UK Ltd, Yarnton, Oxfordshire, England.
5. O. V. Dolomanov, L. J. Bourhis, R. J. Gildea, J. A. K. Howard and H. Puschmann, *J. Appl. Cryst.*, **2009**, *42*, 339-341.
6. G.M. Sheldrick, *Acta. Cryst.*, **2015**, **A71**, 3-8.
7. G.M. Sheldrick, *Acta. Cryst.*, **2015**, **C71**, 3-8.
8. Gaussian 16, Revision A.03, M. J. Frisch, G. W. Trucks, H. B. Schlegel, G. E. Scuseria, M. A. Robb, J. R. Cheeseman, G. Scalmani, V. Barone, G. A. Petersson, H. Nakatsuji, X. Li, M. Caricato, A. V. Marenich, J. Bloino, B. G. Janesko, R. Gomperts, B. Mennucci, H. P. Hratchian, J. V. Ortiz, A. F. Izmaylov, J. L. Sonnenberg, D. Williams-Young, F. Ding, F. Lipparini, F. Egidi, J. Goings, B. Peng, A. Petrone, T. Henderson, D. Ranasinghe, V. G. Zakrzewski, J. Gao, N. Rega, G. Zheng, W. Liang, M. Hada, M. Ehara, K. Toyota, R. Fukuda, J. Hasegawa, M. Ishida, T. Nakajima, Y. Honda, O. Kitao, H. Nakai, T. Vreven, K. Throssell, J. A. Montgomery, Jr., J. E. Peralta, F. Ogliaro, M. J. Bearpark, J. J. Heyd, E. N. Brothers, K. N. Kudin, V. N. Staroverov, T. A. Keith, R. Kobayashi, J. Normand, K.



---

Raghavachari, A. P. Rendell, J. C. Burant, S. S. Iyengar, J. Tomasi, M. Cossi, J. M. Millam, M. Klene, C. Adamo, R. Cammi, J. W. Ochterski, R. L. Martin, K. Morokuma, O. Farkas, J. B. Foresman, and D. J. Fox, Gaussian, Inc., Wallingford CT, 2016.

9. (a) S. Grimme, J. Antony, S. Ehrlich, H. Krieg, *J. Chem. Phys.* **2010**, *132*, 154104; (b) A. D. Becke, *J. Chem. Phys.* **1993**, *98*, 5648–5652; (c) C. Lee, W. Yang, R. G. Parr, *Phys. Rev. B* **1988**, *37*, 785–789.

10. Y. Zhao, D. G. Truhlar, *Phys. Chem. Chem. Phys.* **2008**, *10*, 2813–2318.

## 8. NMR Spectra

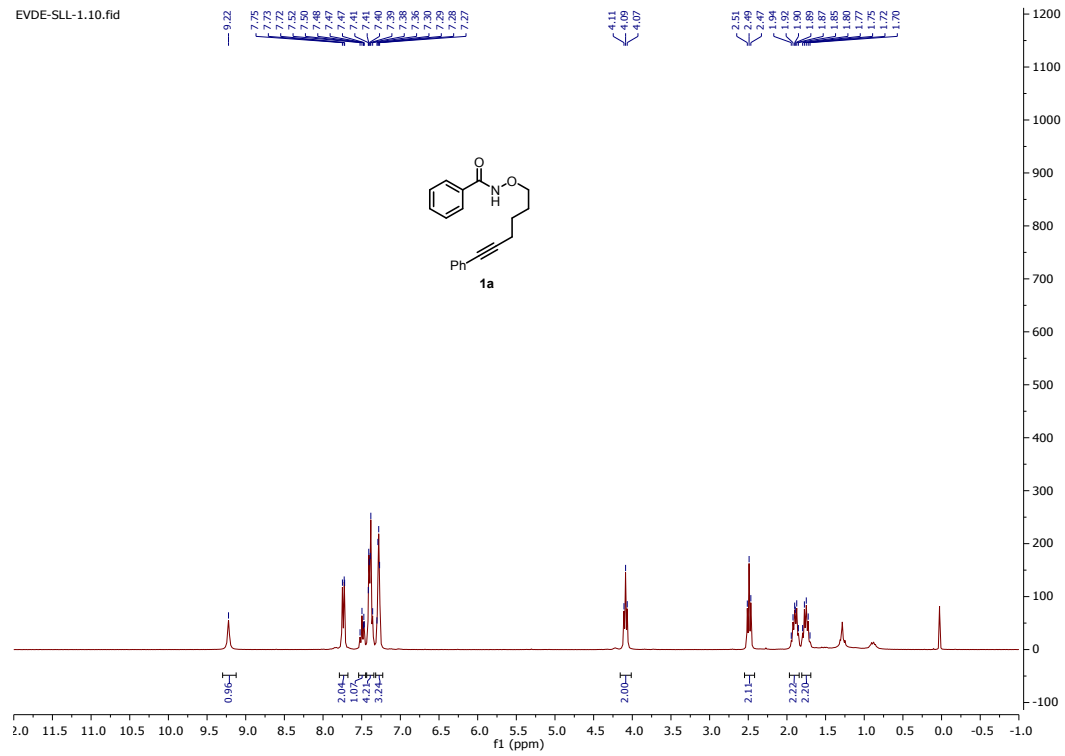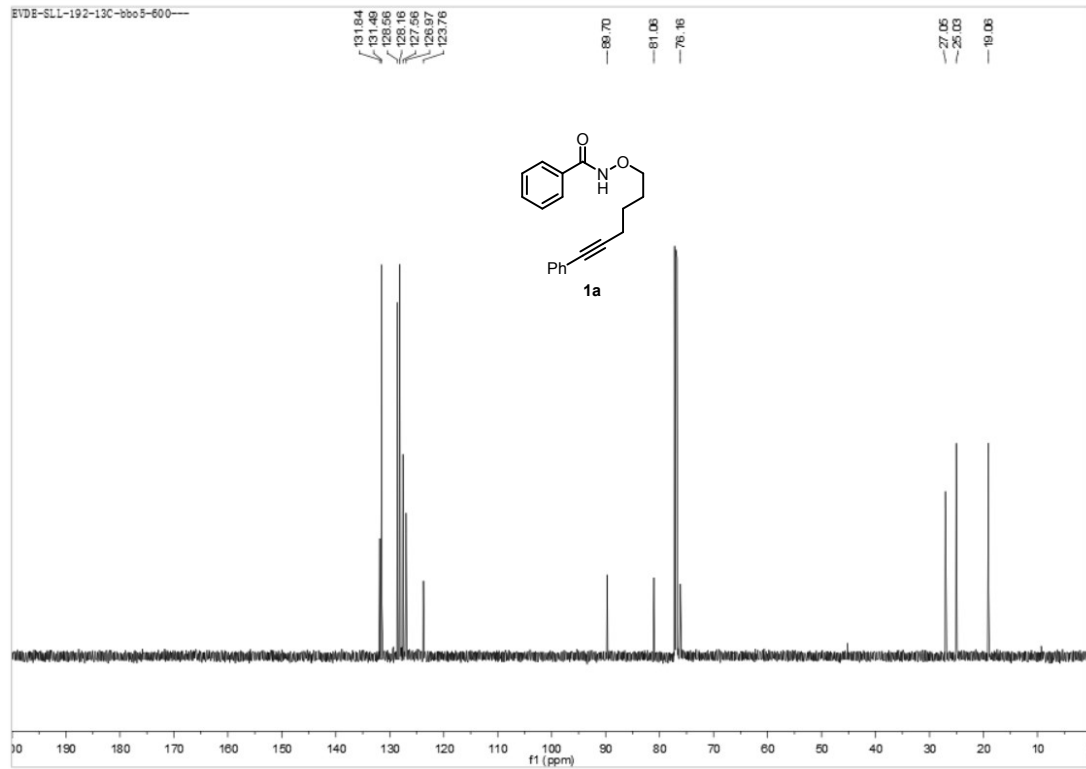

EVDE-SLL-2.10.fid

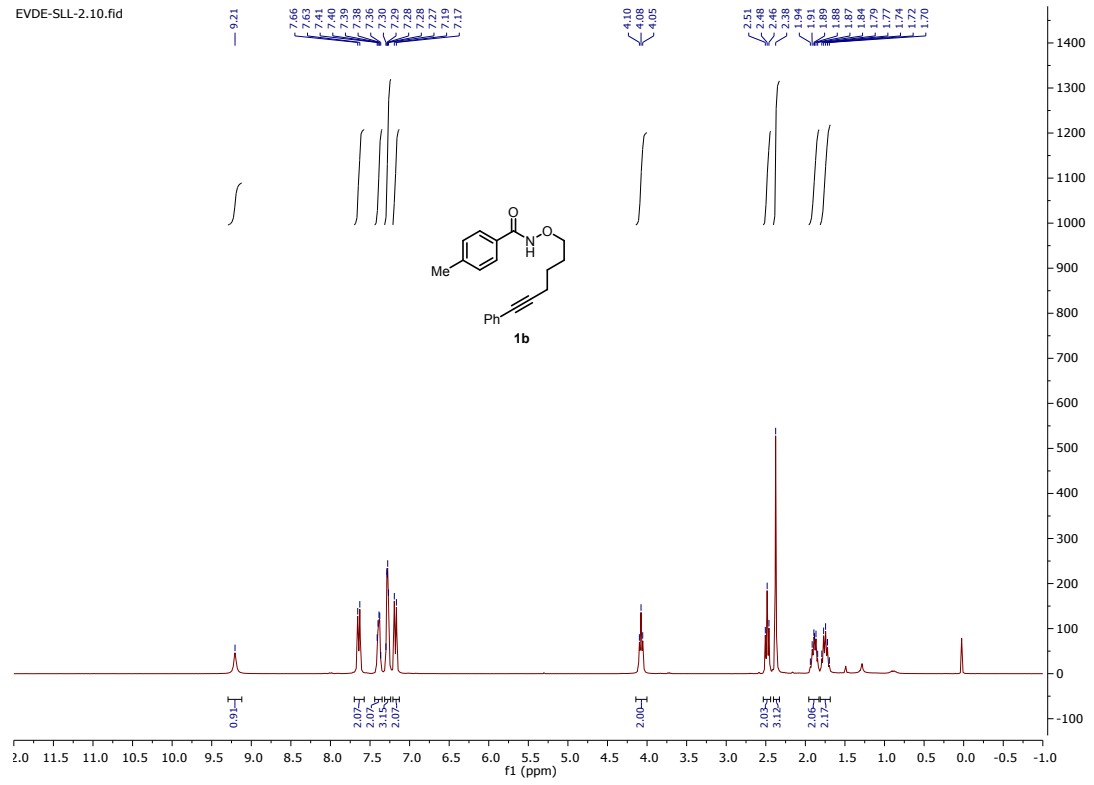

EVDE-SLL-8C

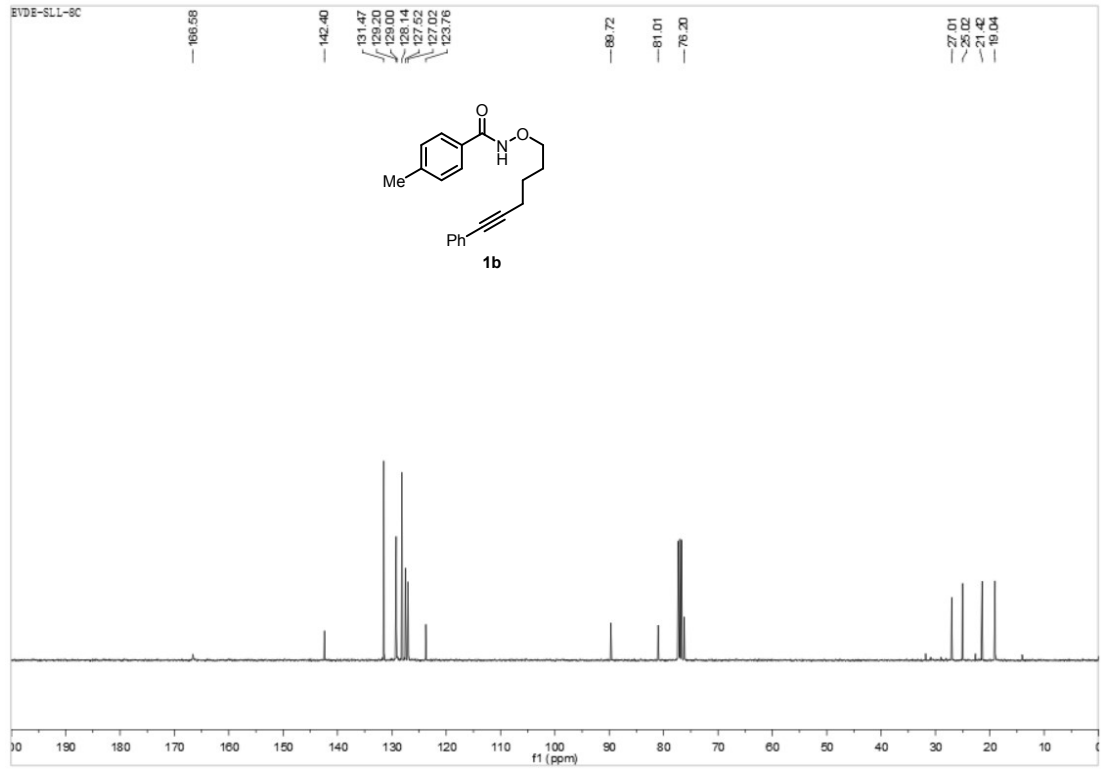

EVDE-SLL-3.10.fid

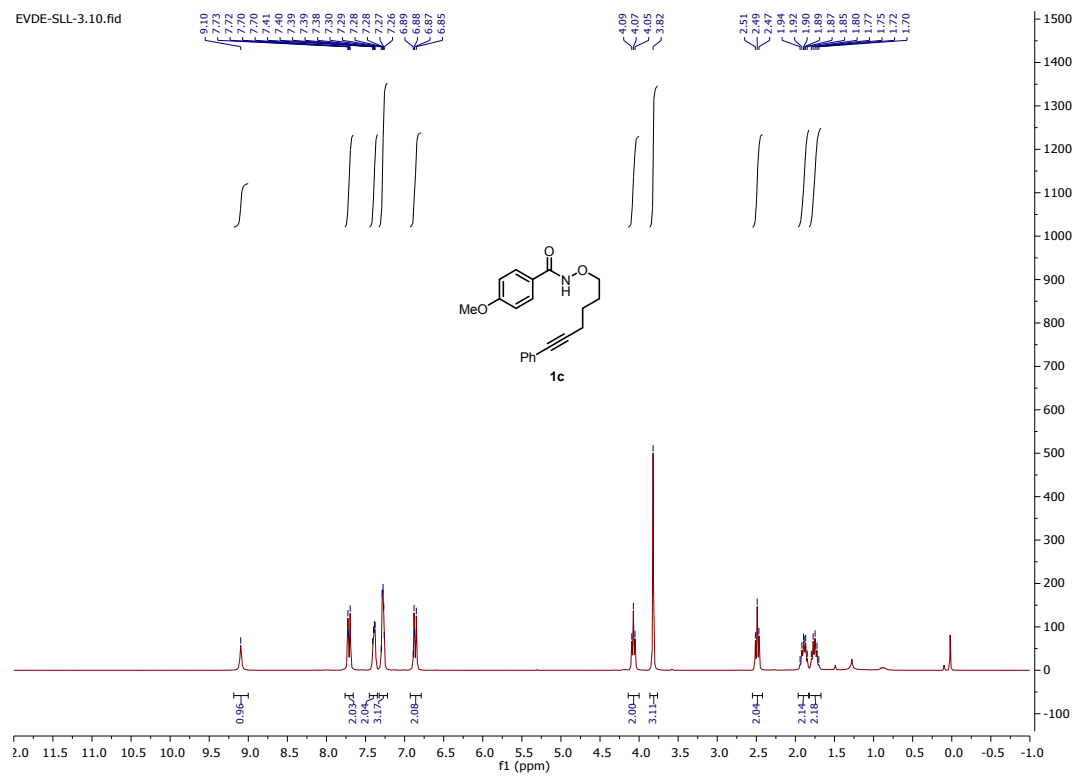

EVDE-SLL-183

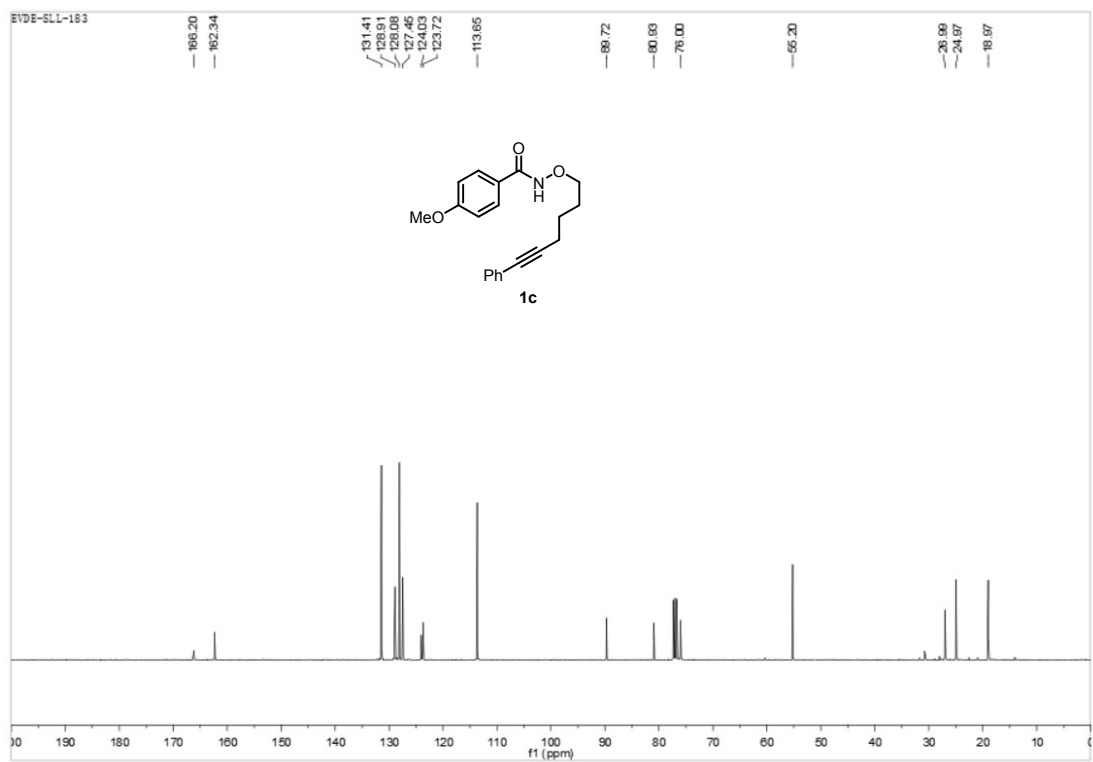

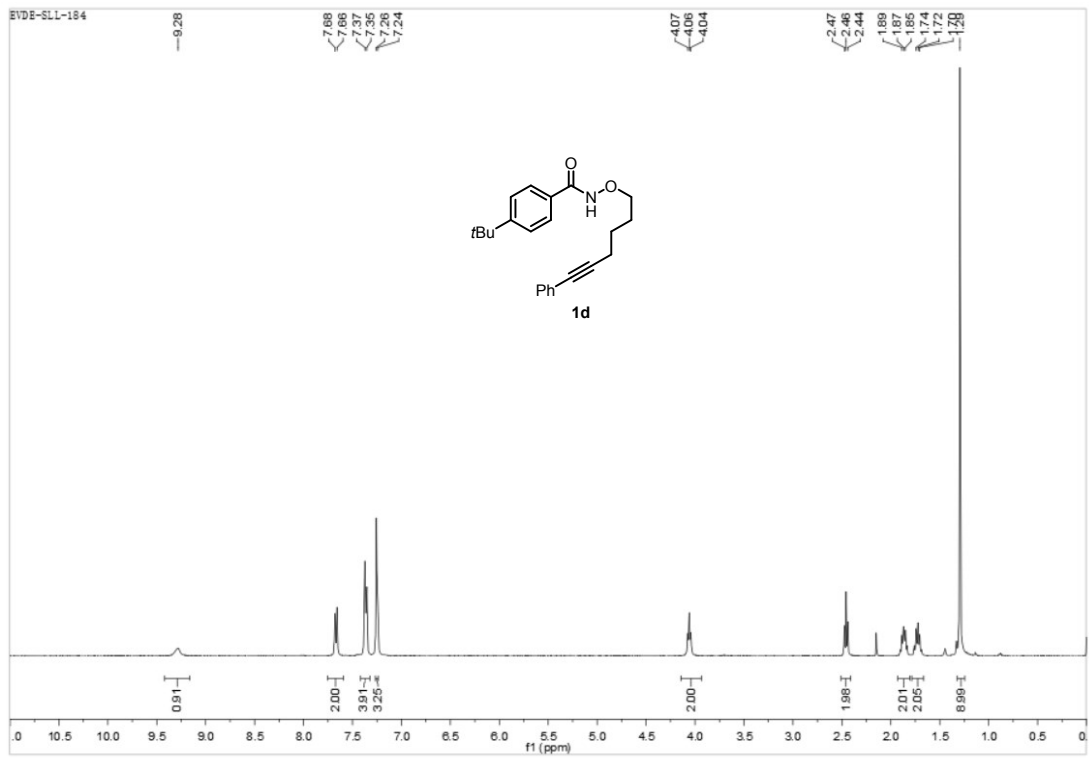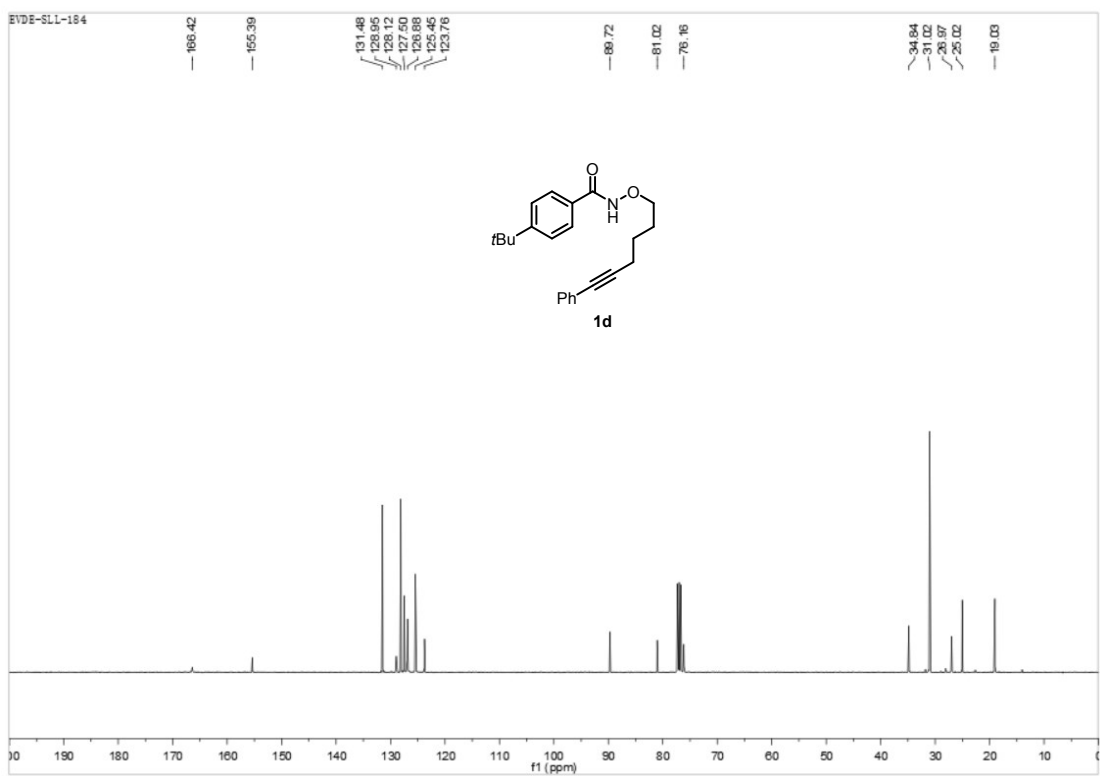

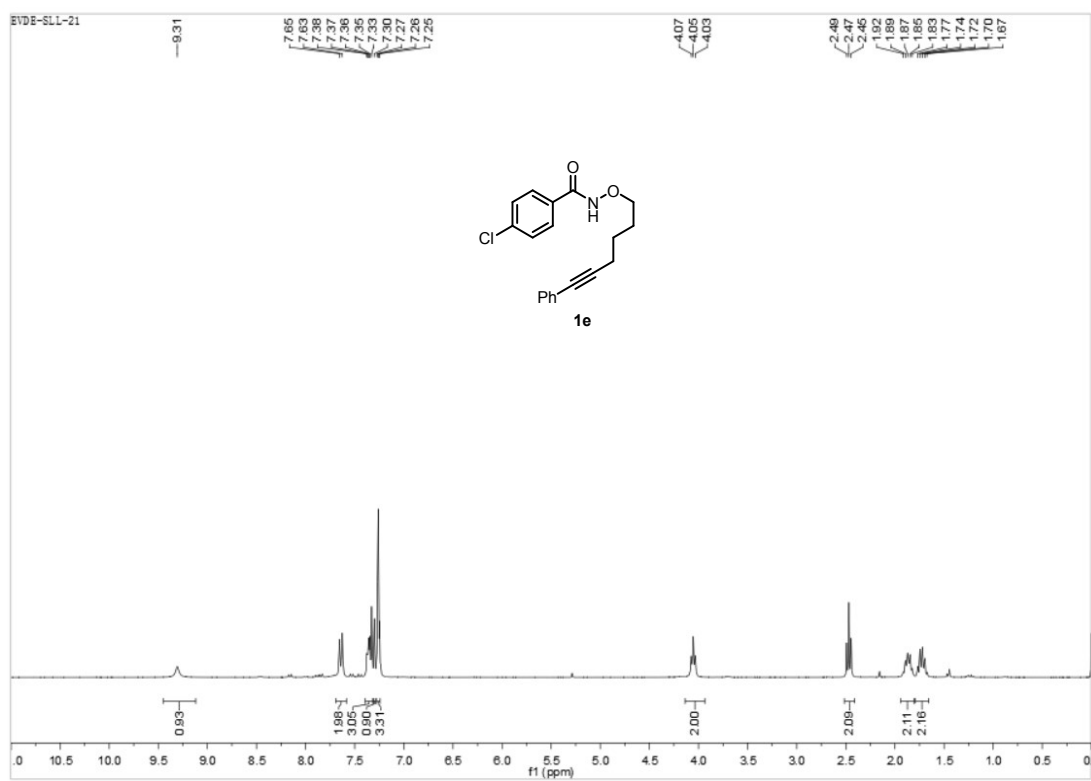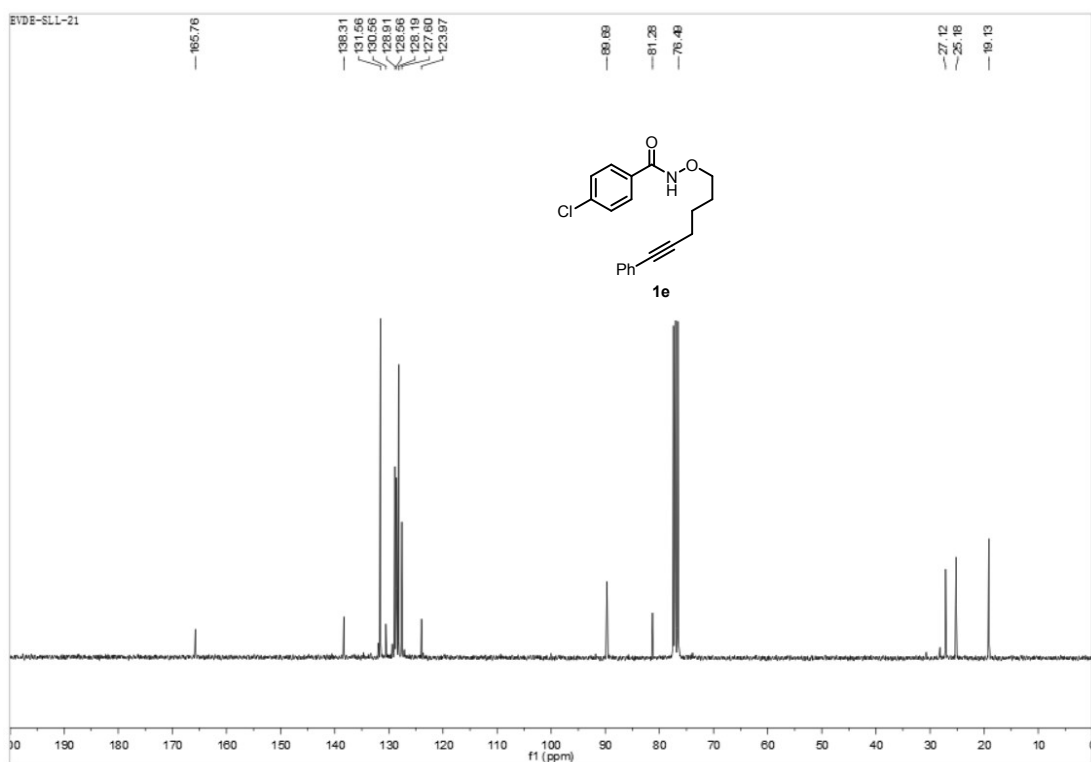

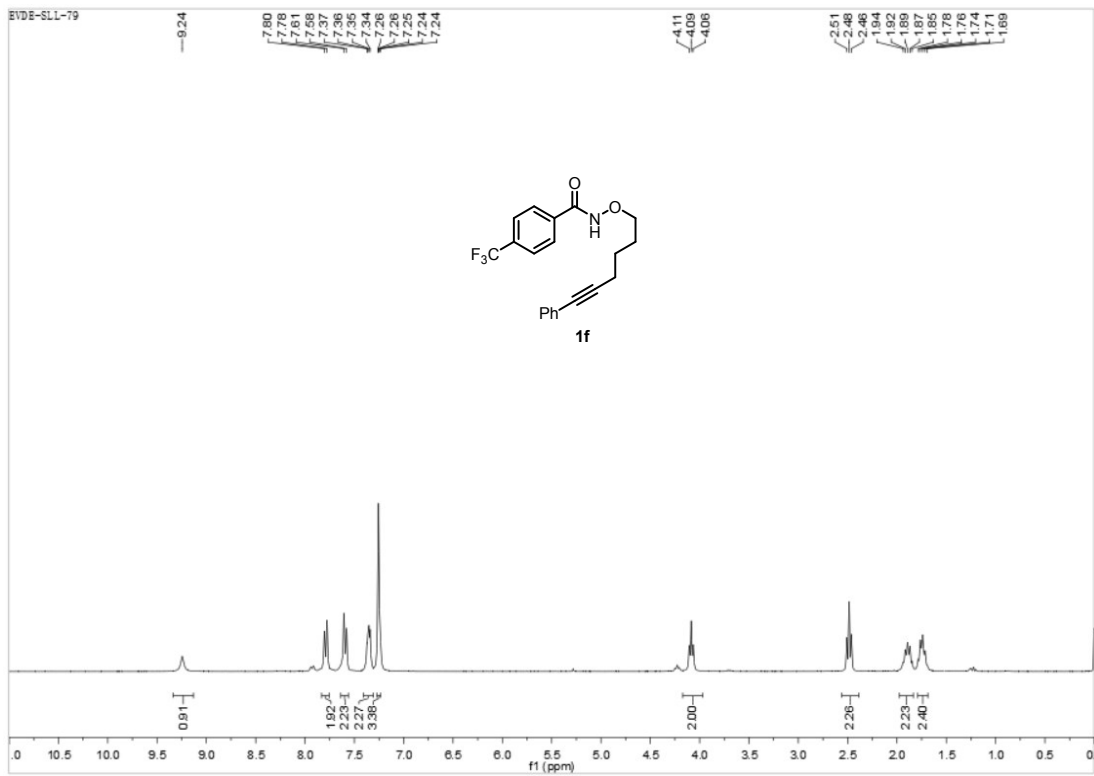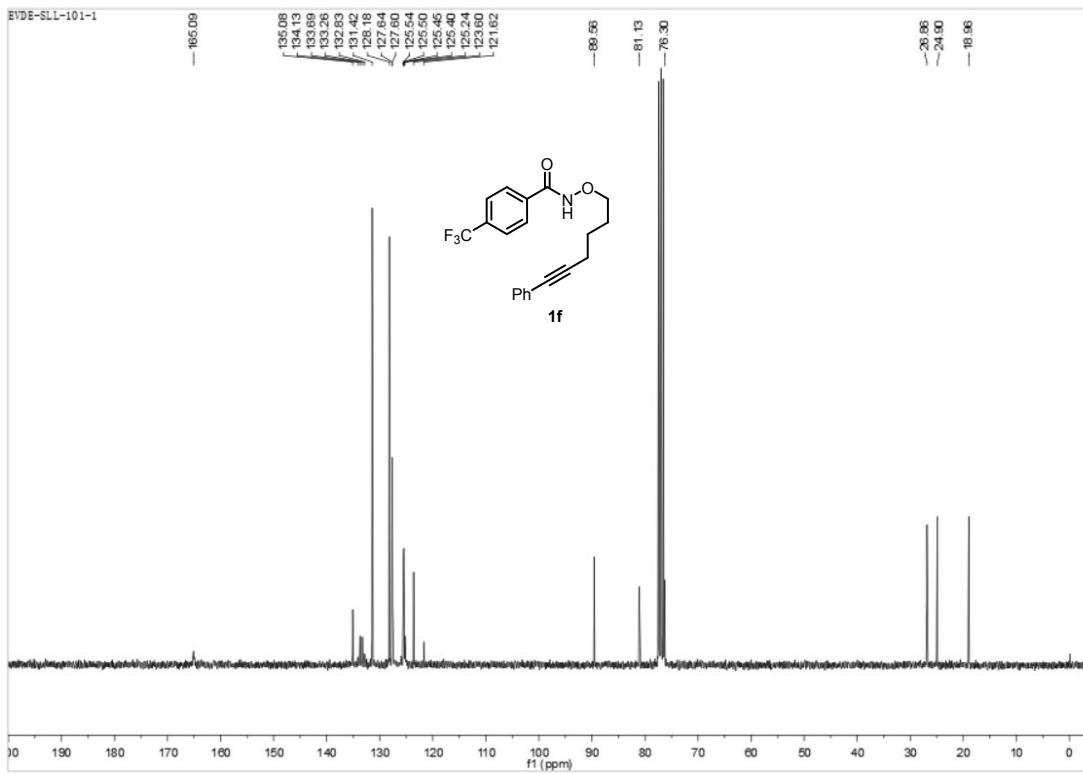

evde-sll-1-f.10.fid

63.14

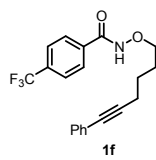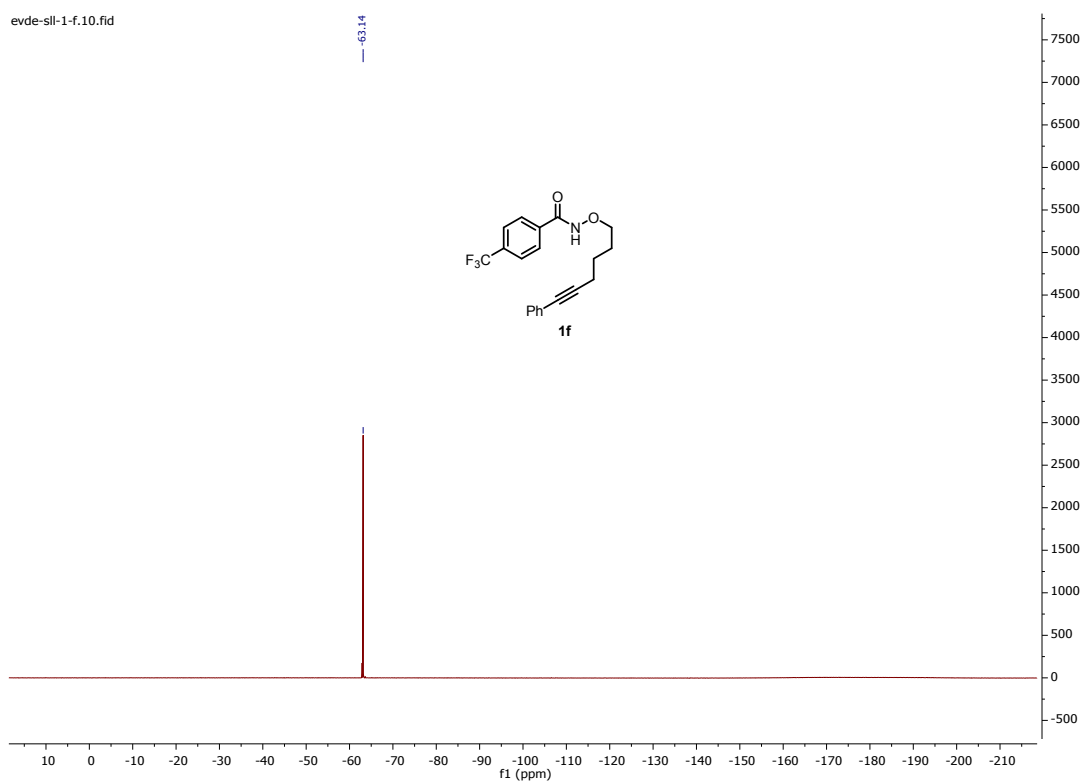



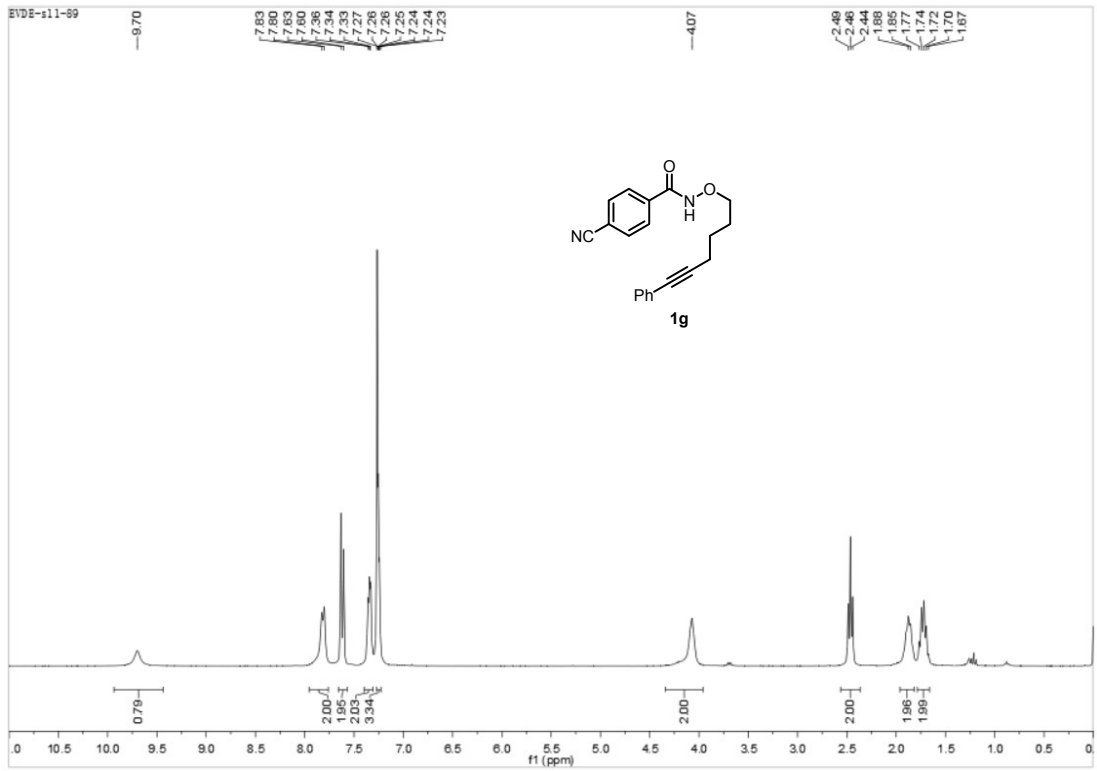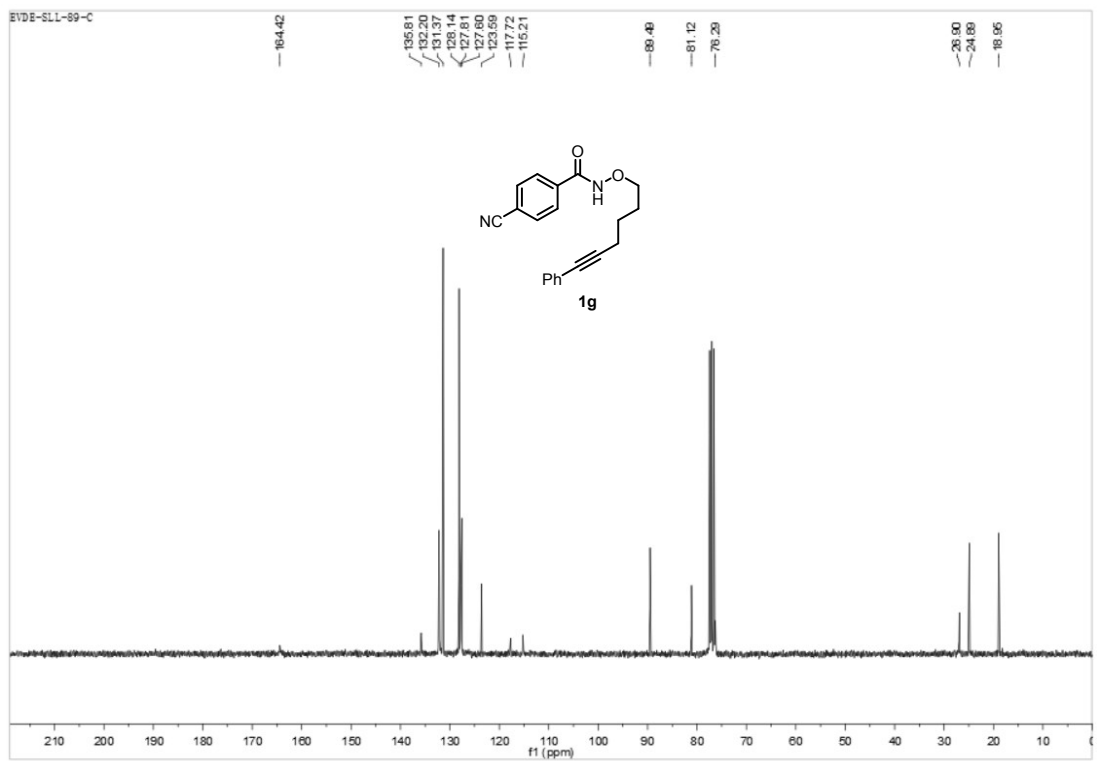

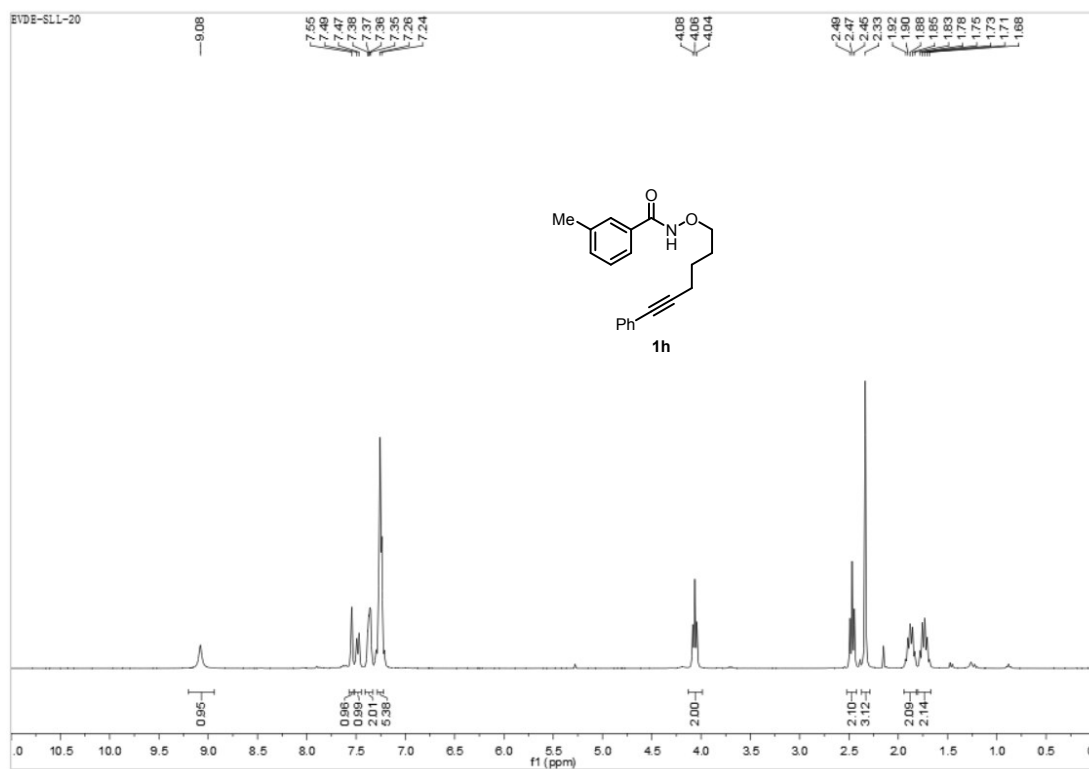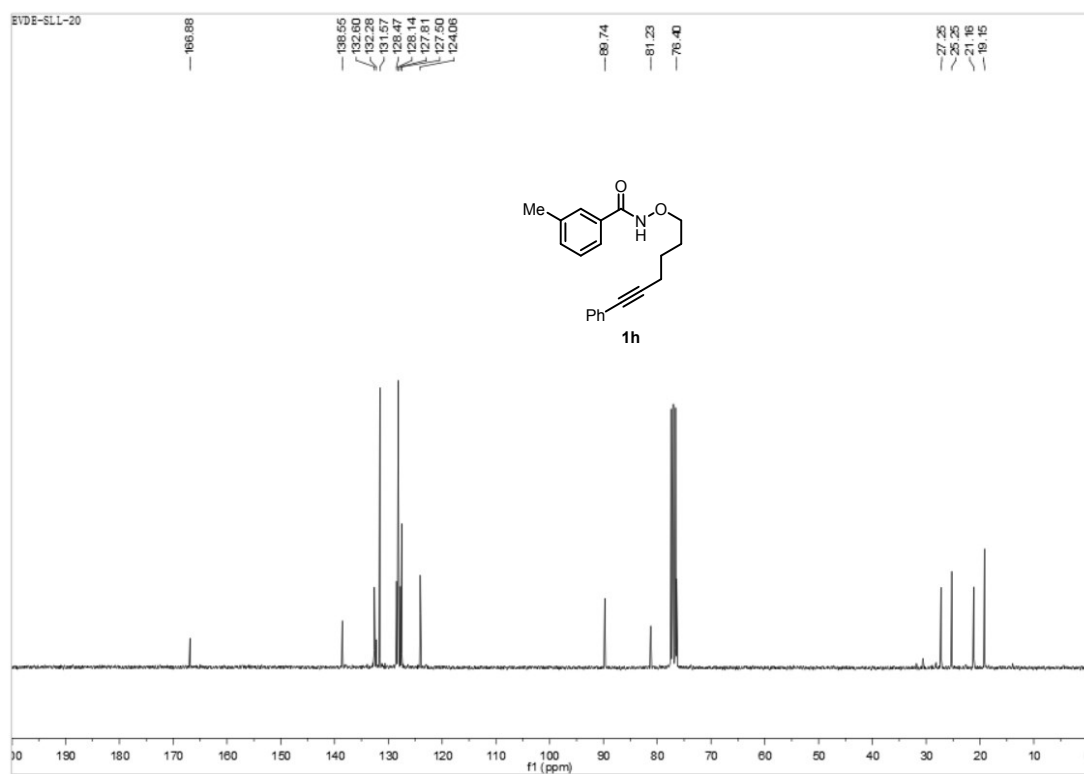

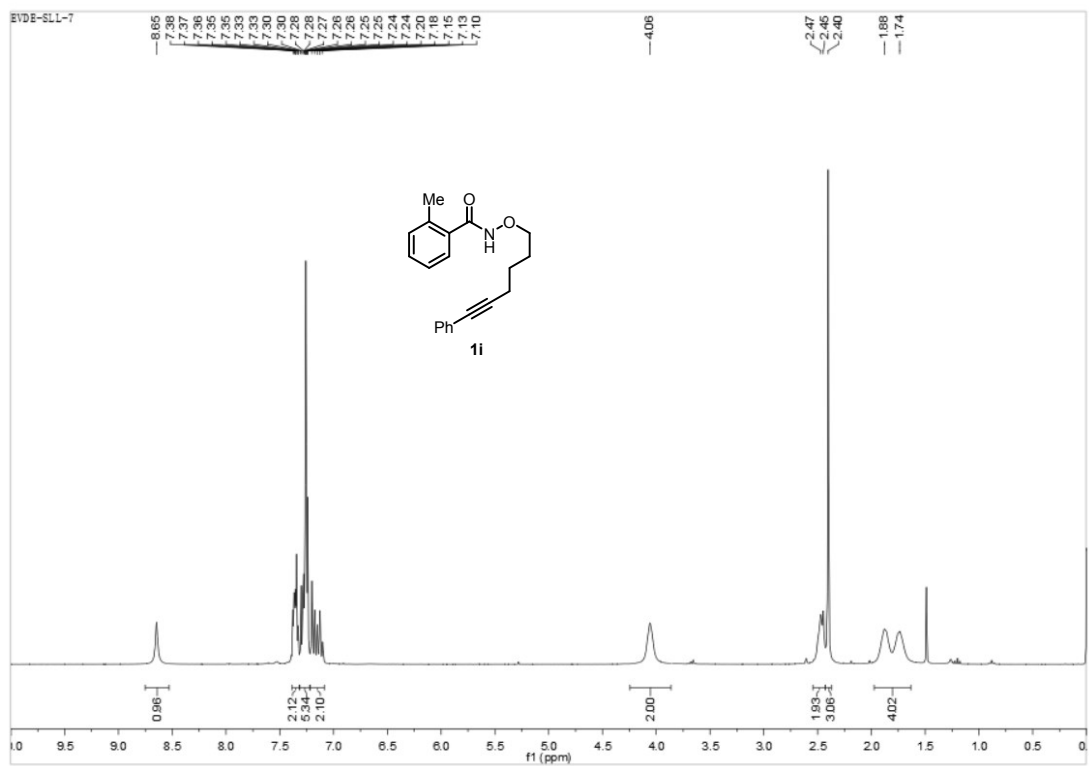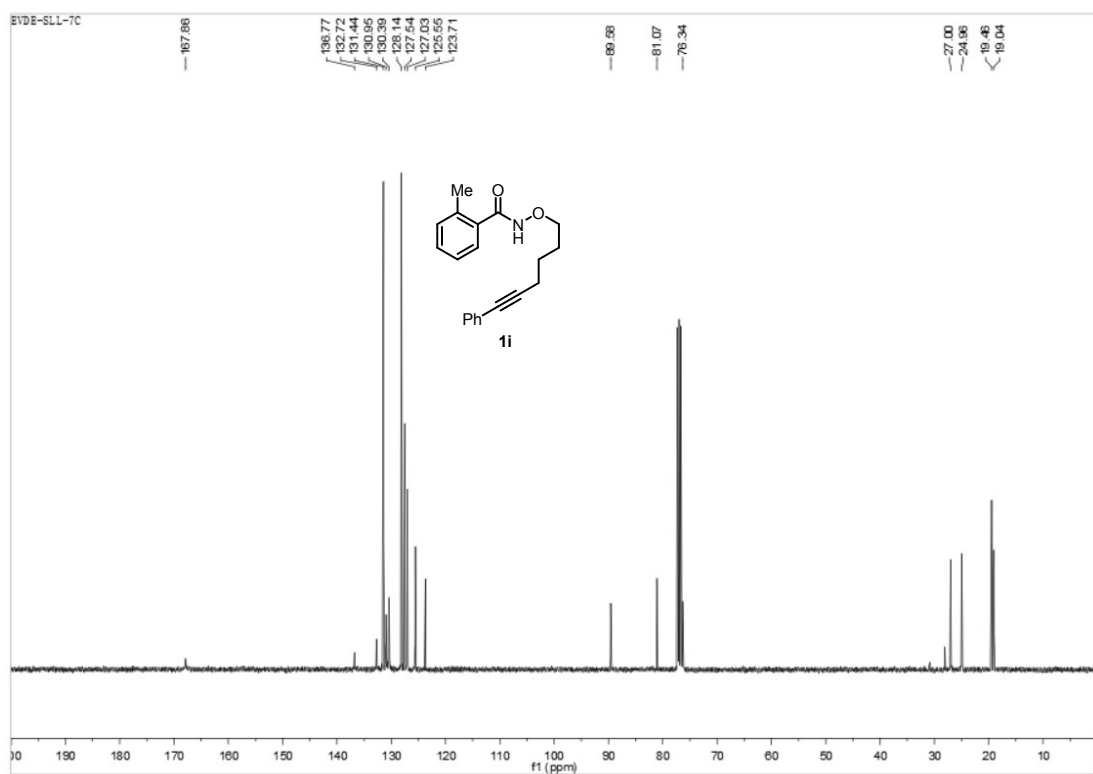

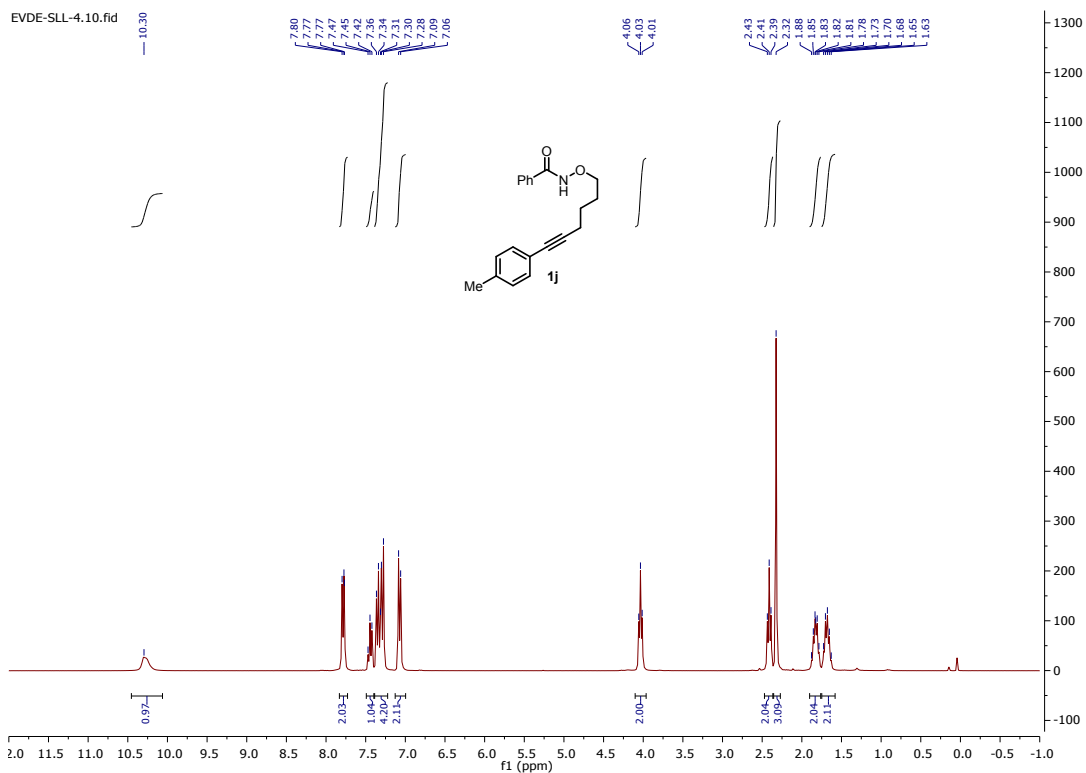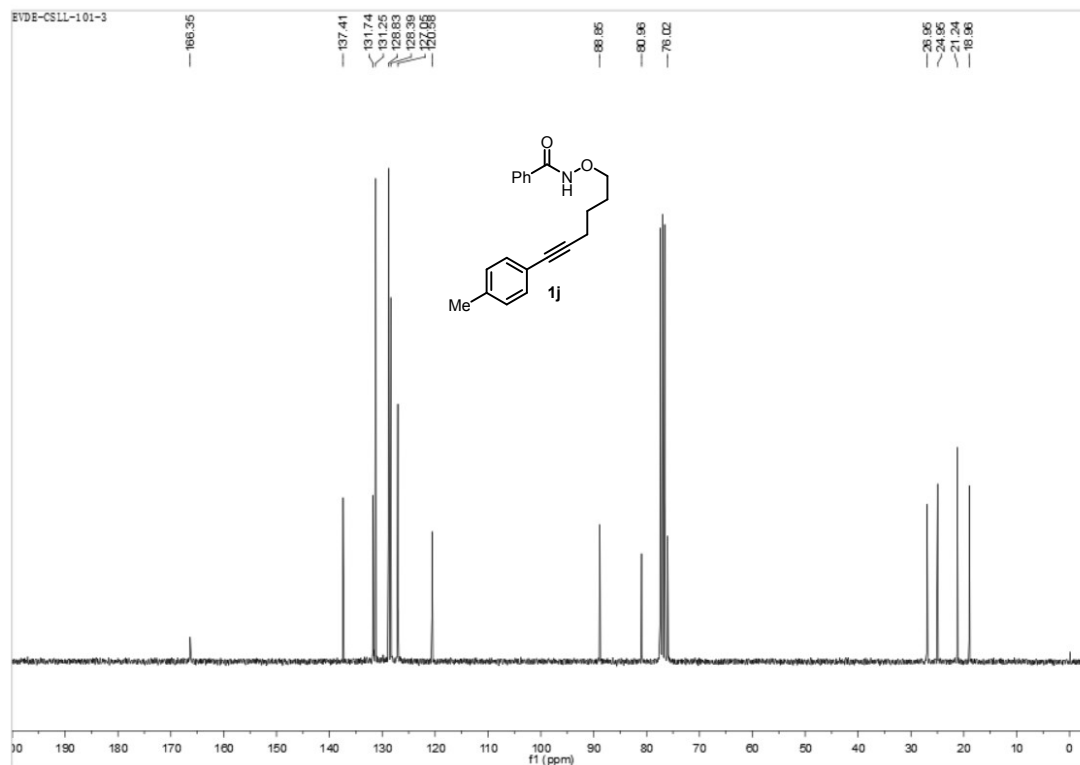

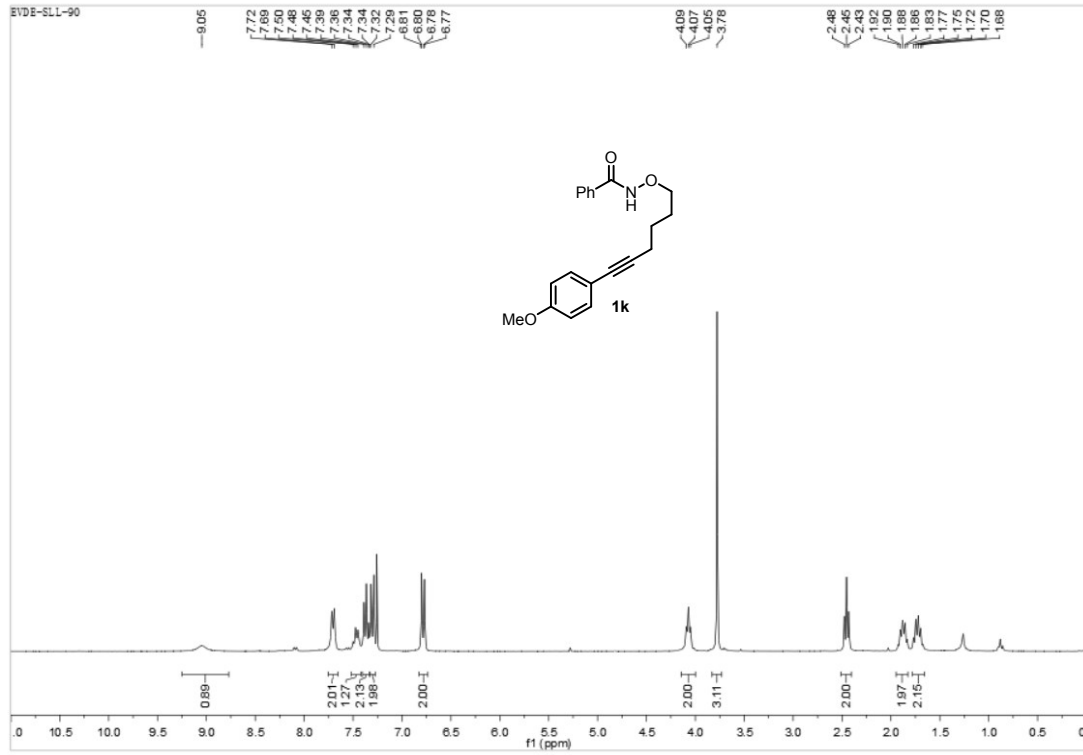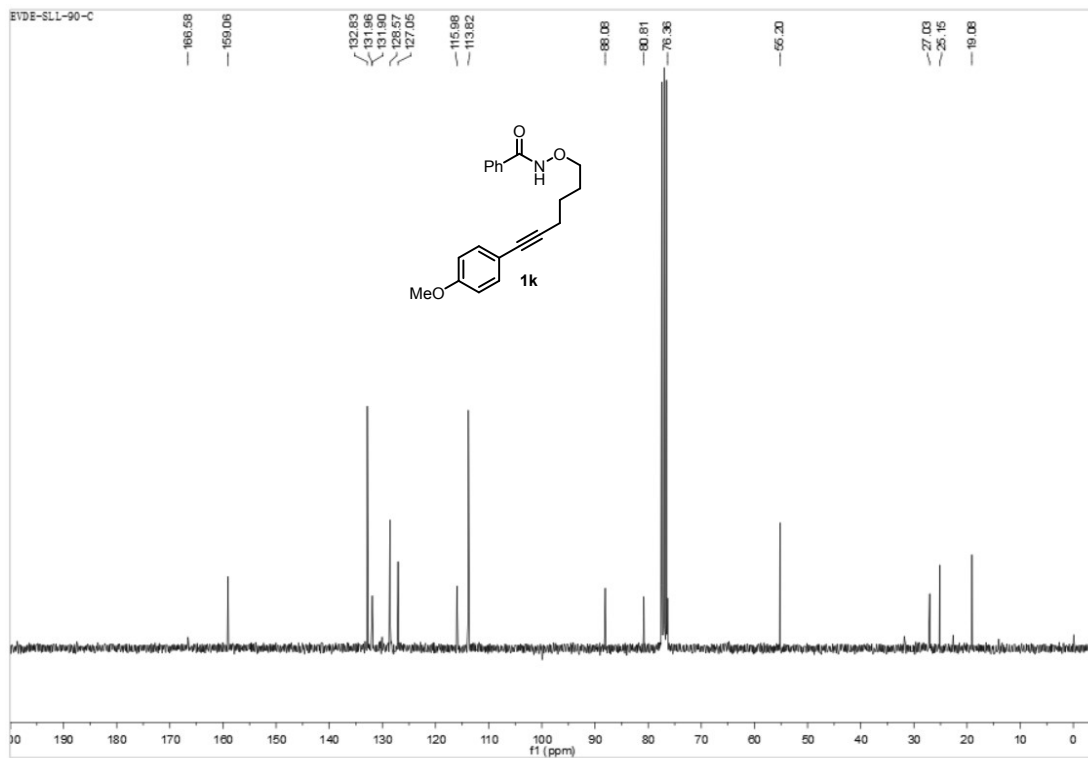

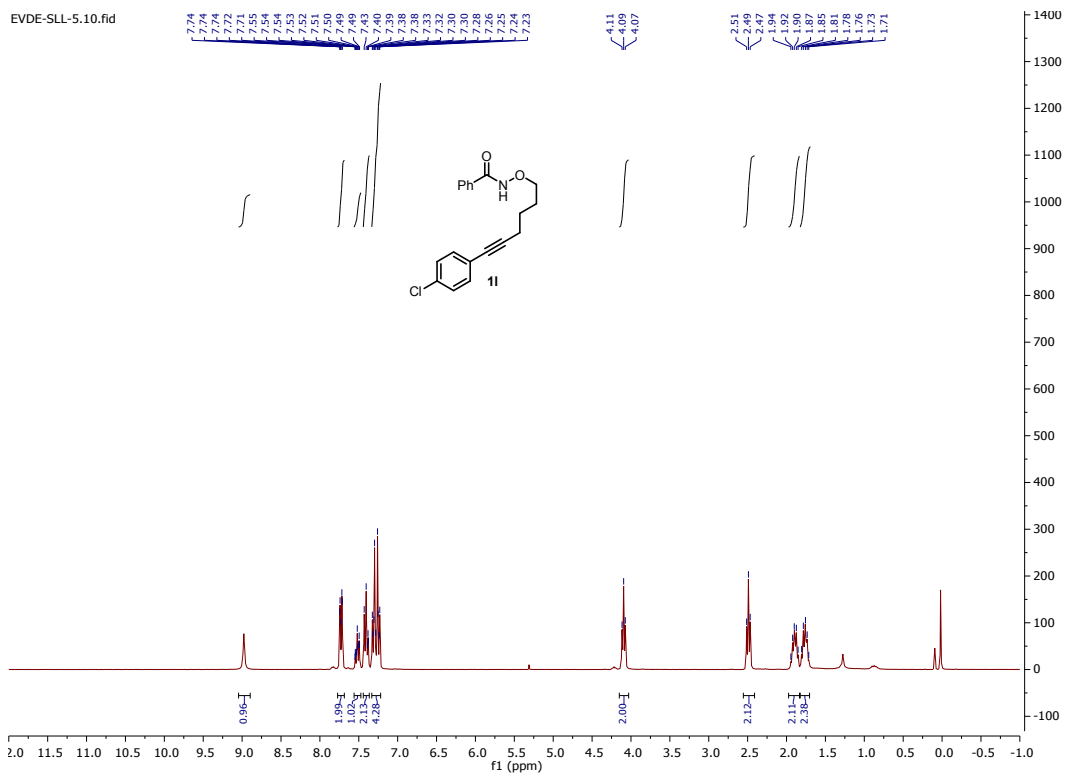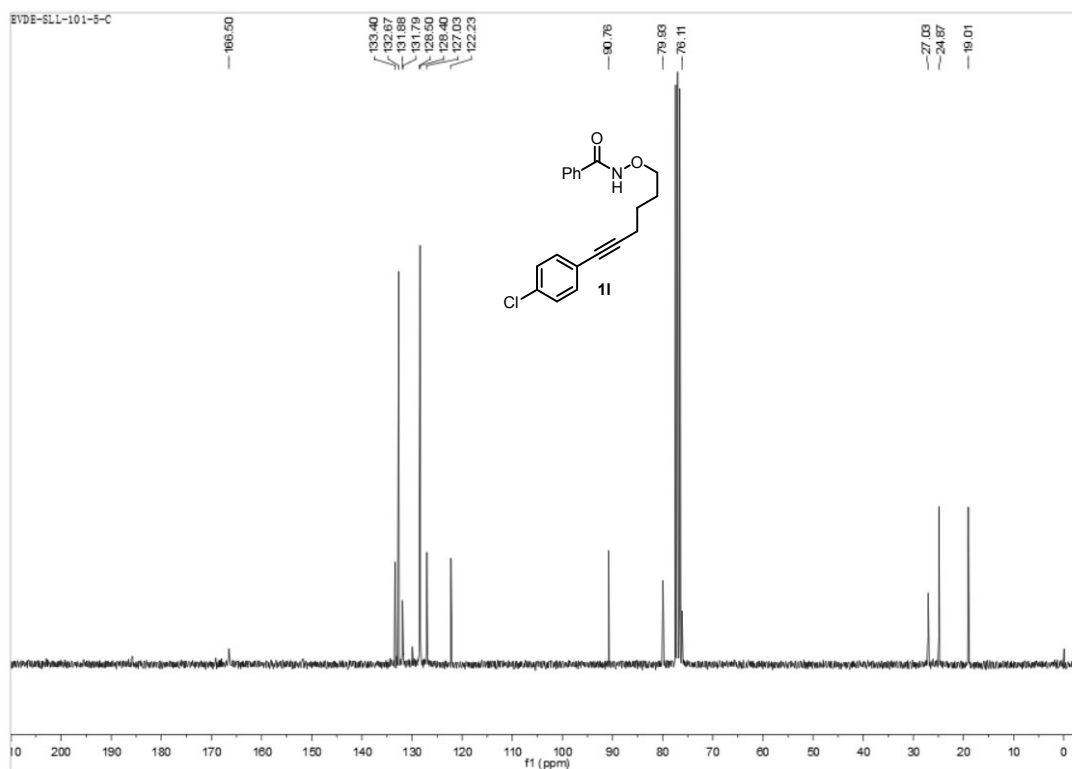

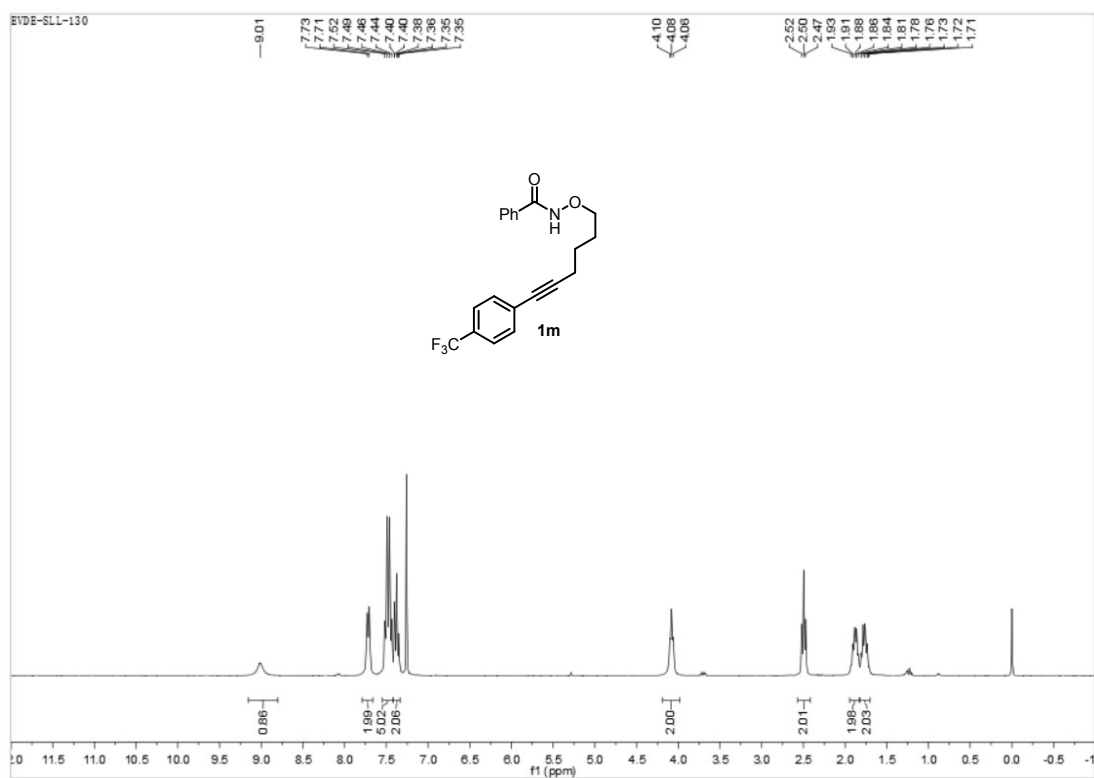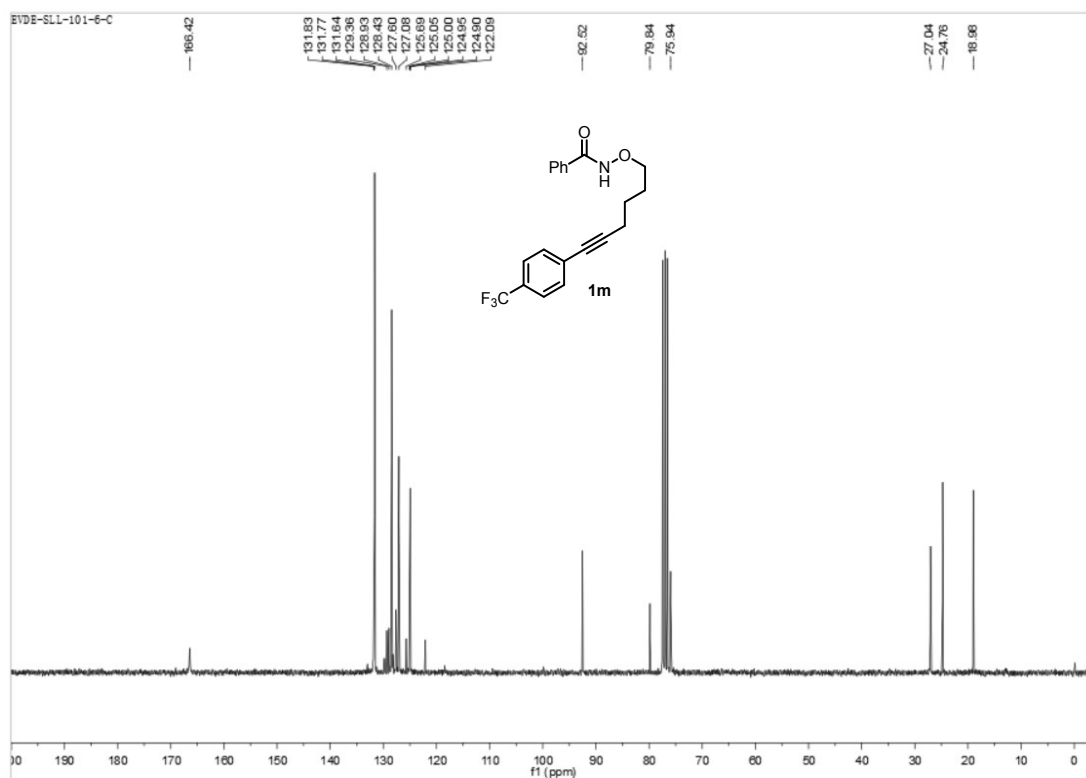

evde-sll-2-f.10.fid

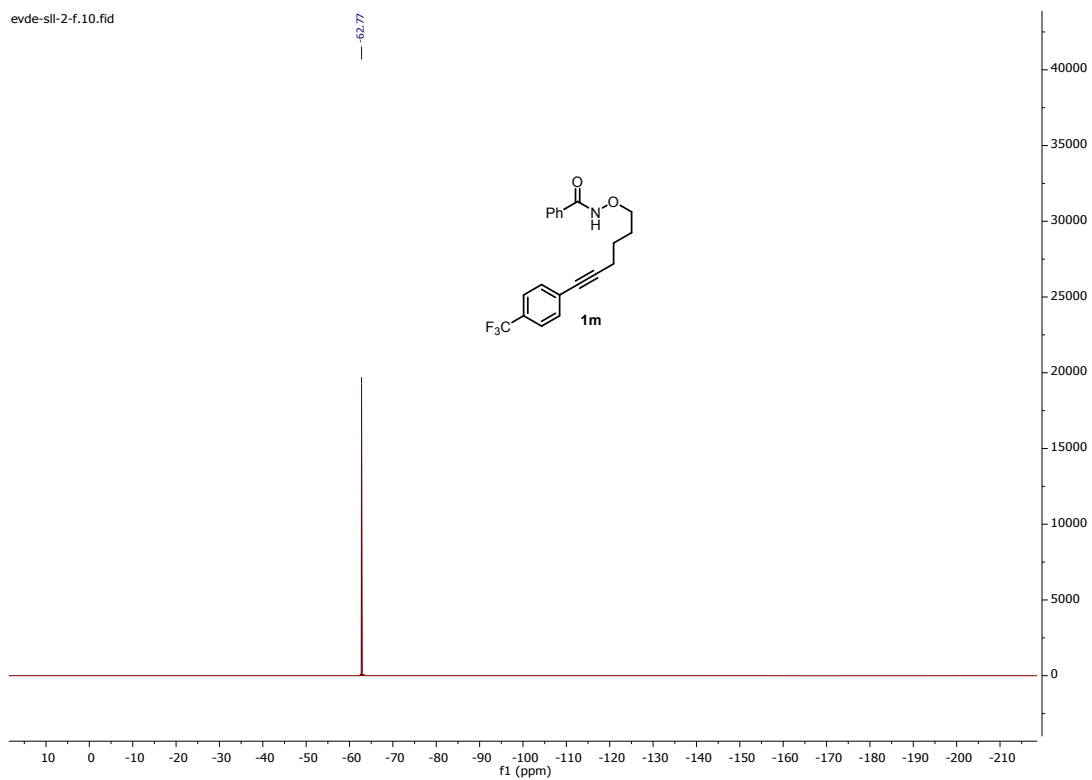



EVDE-SLL-6.10.fid

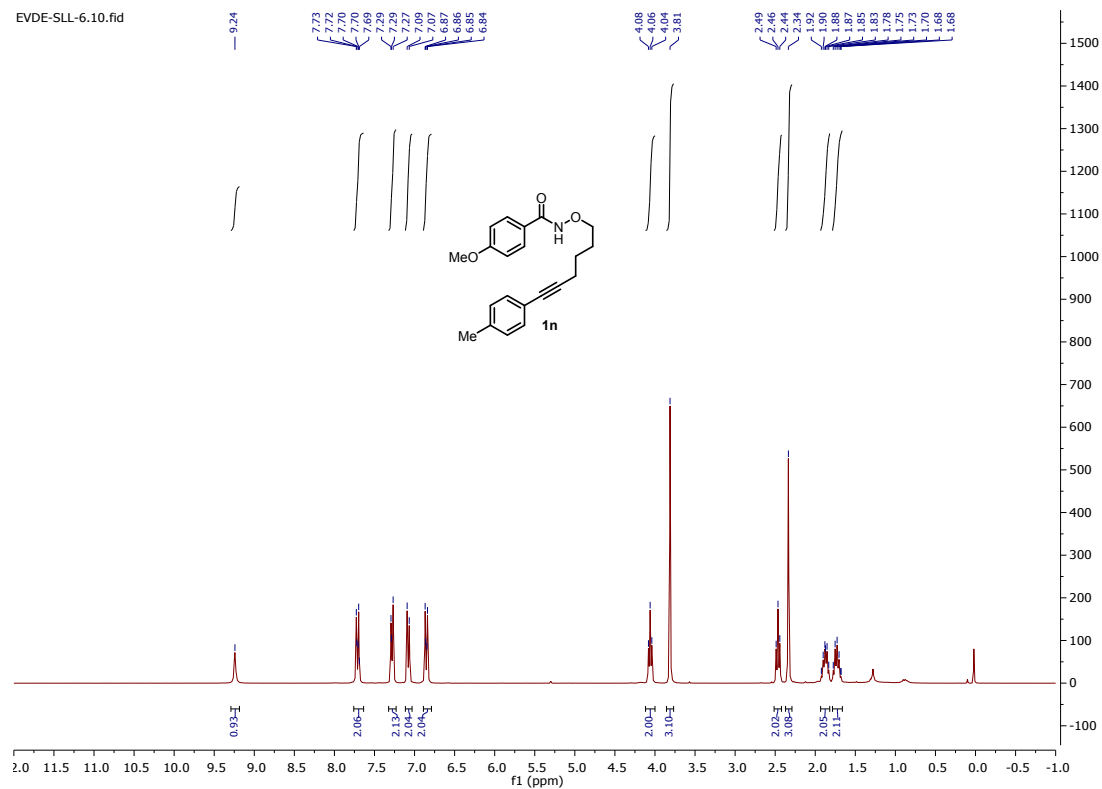

EVDE-CSLL-101-7-C

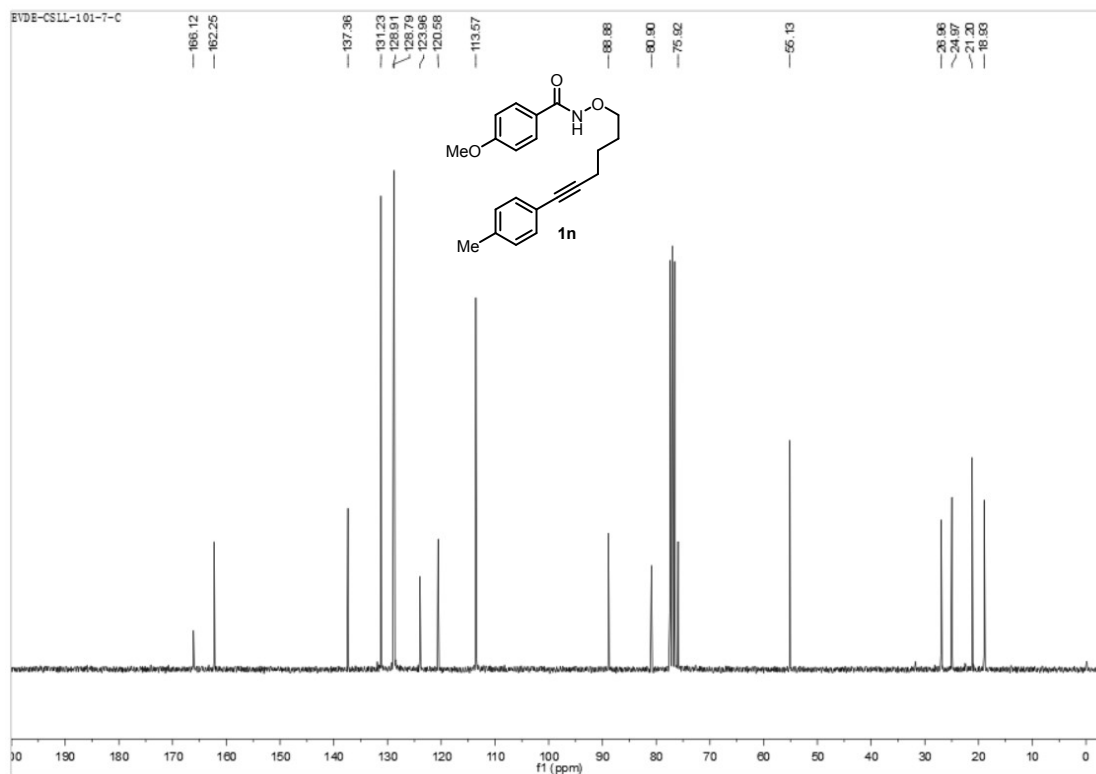

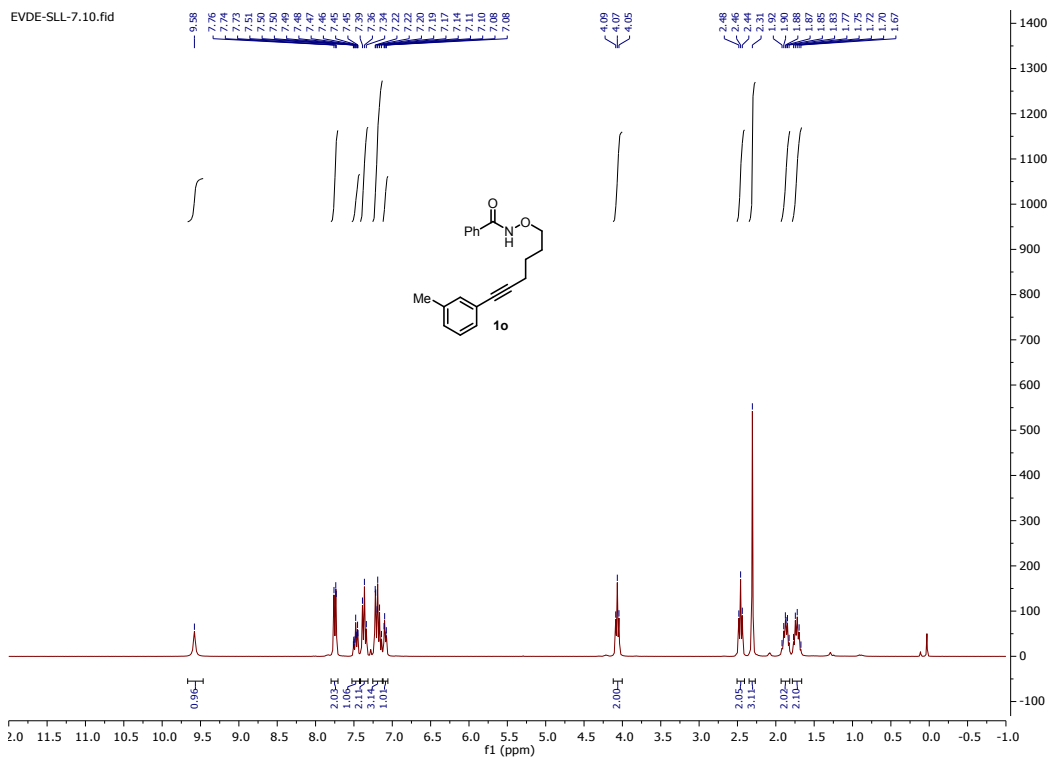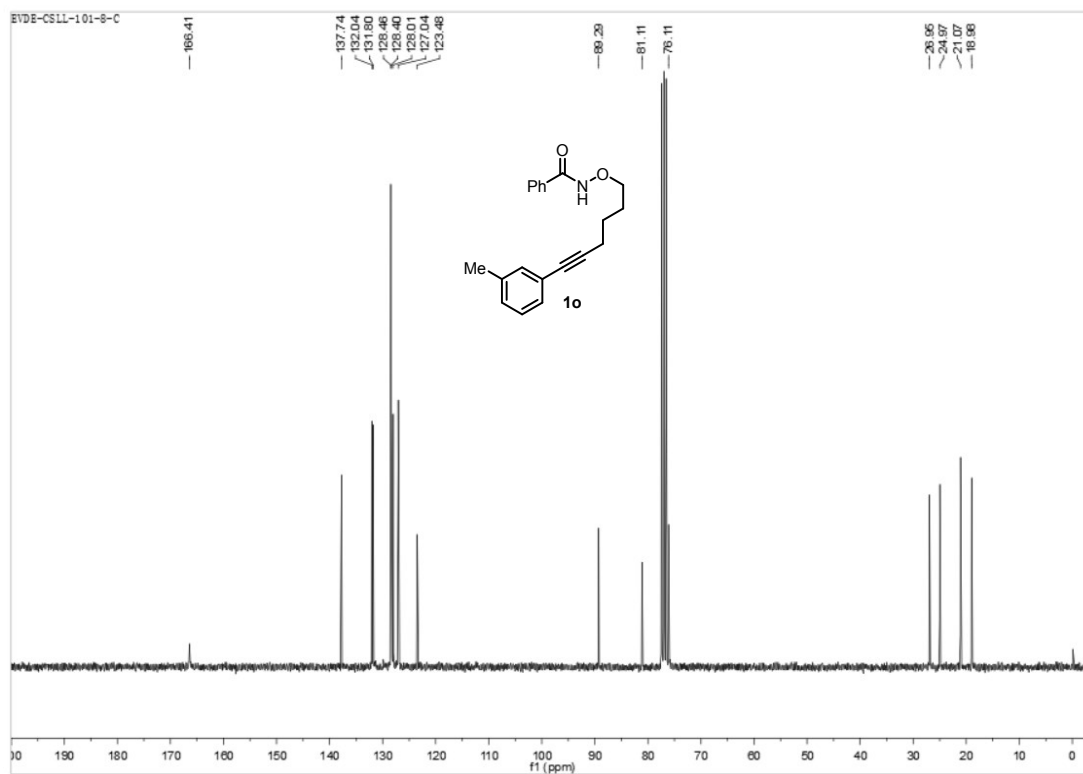

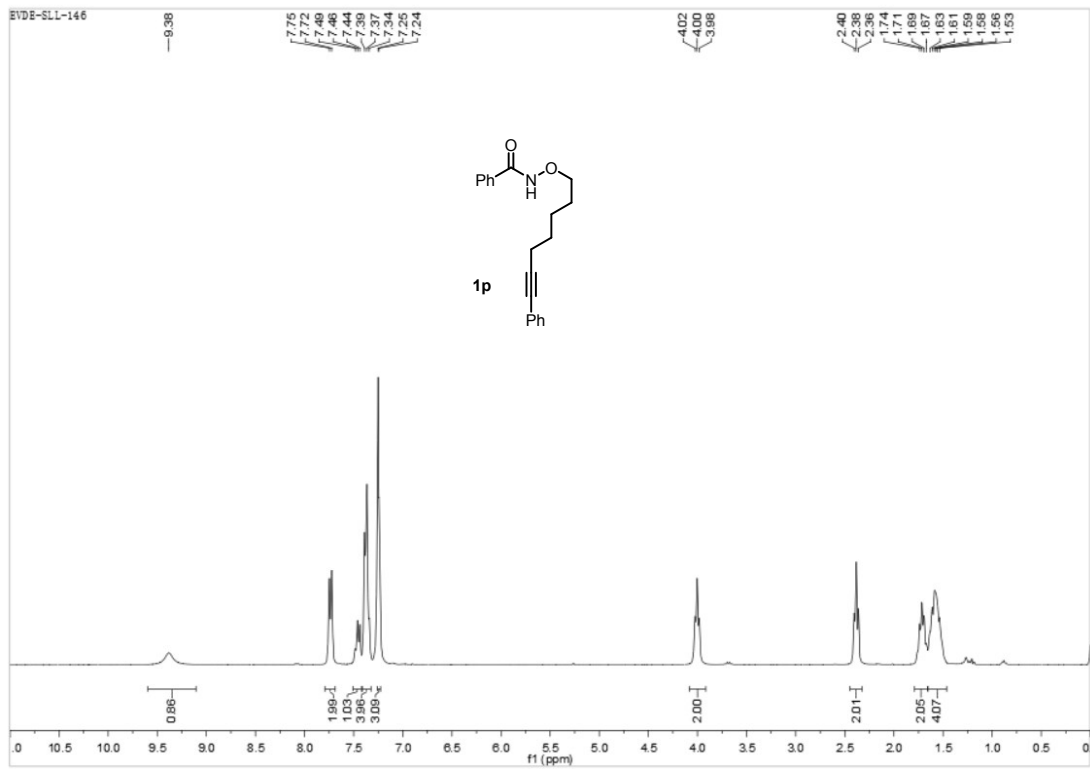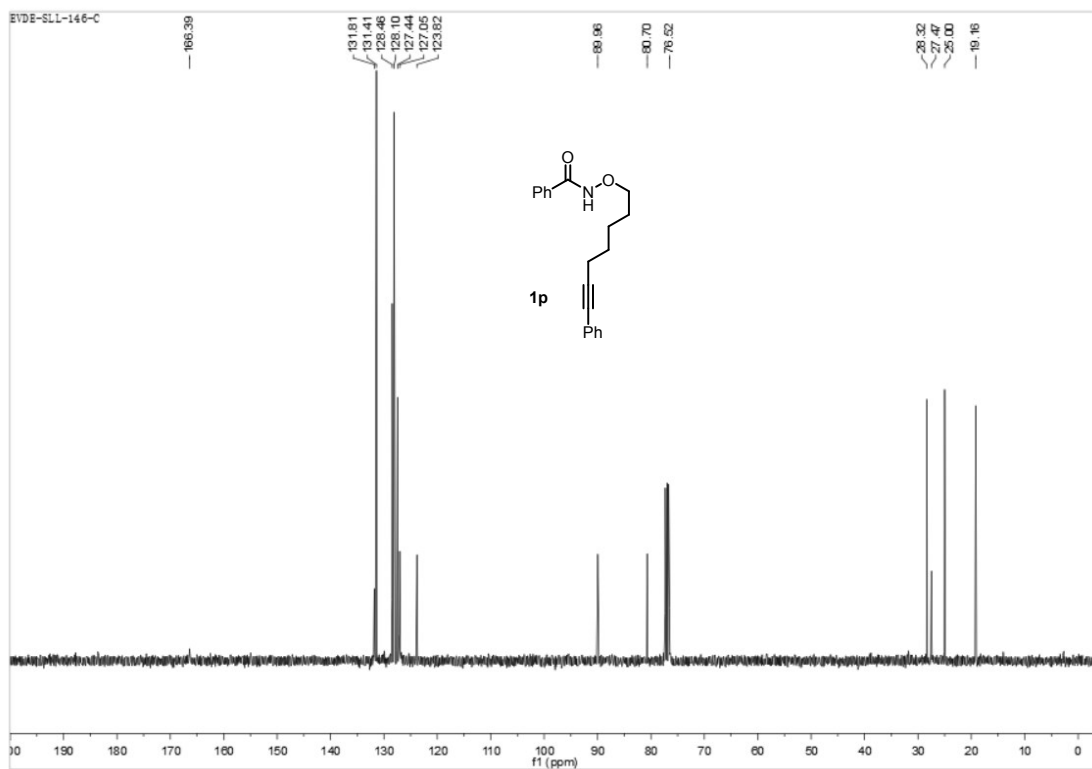

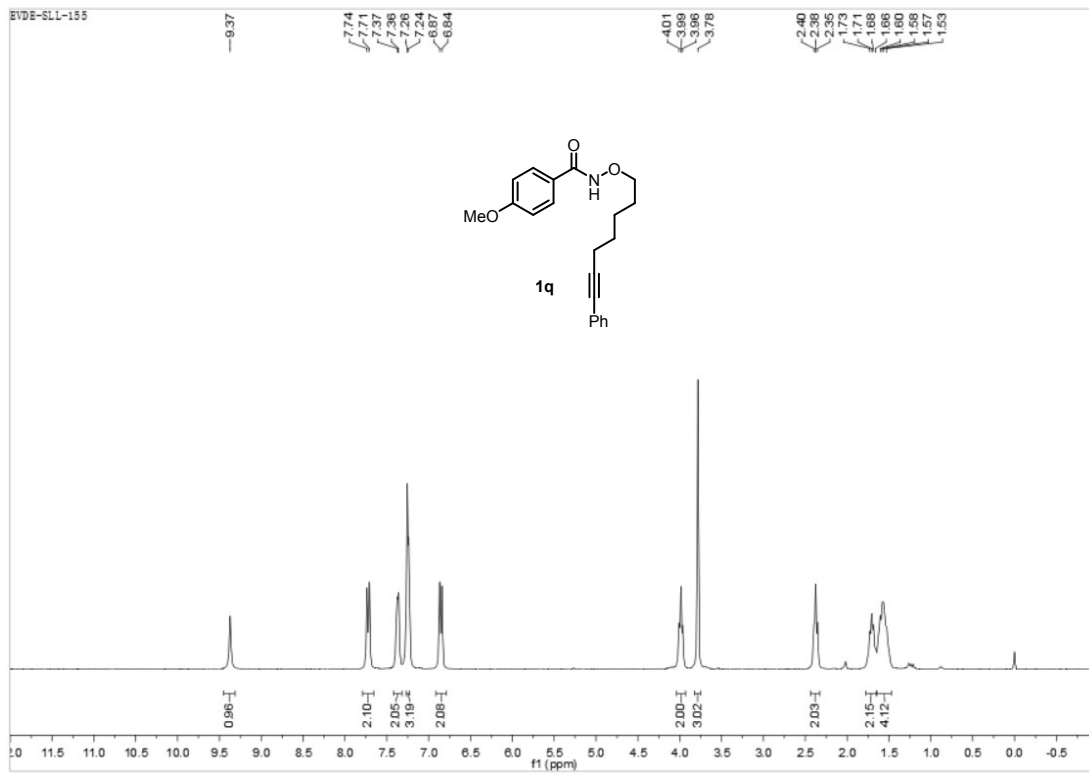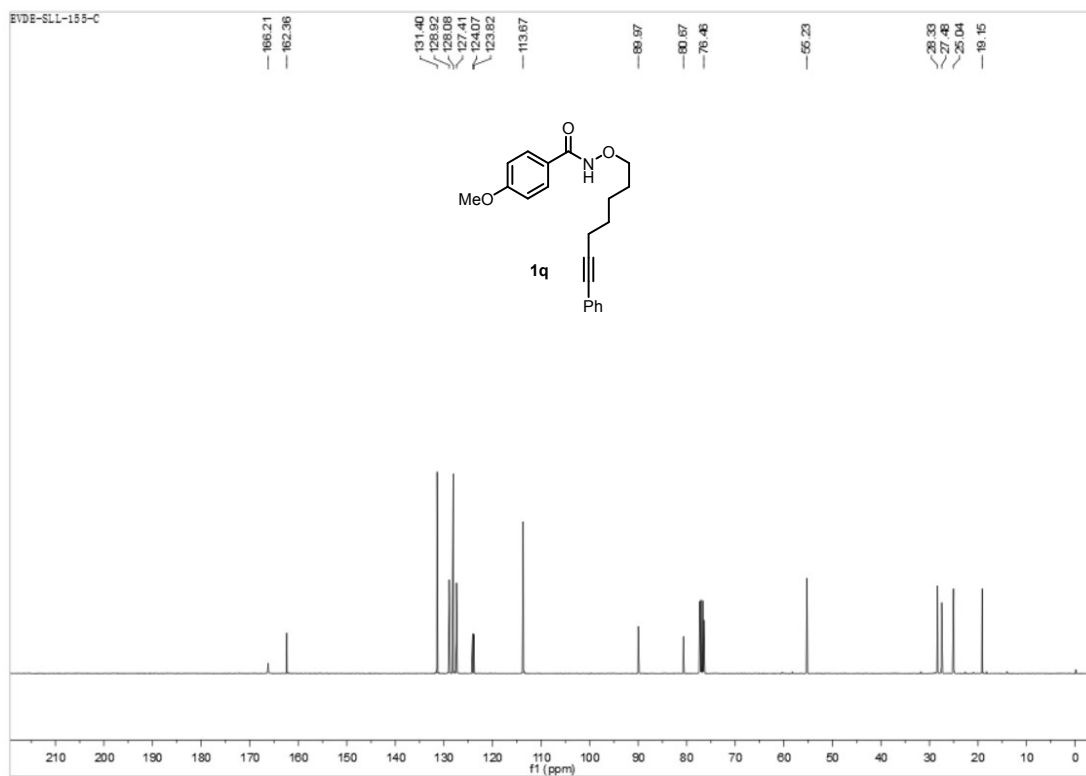

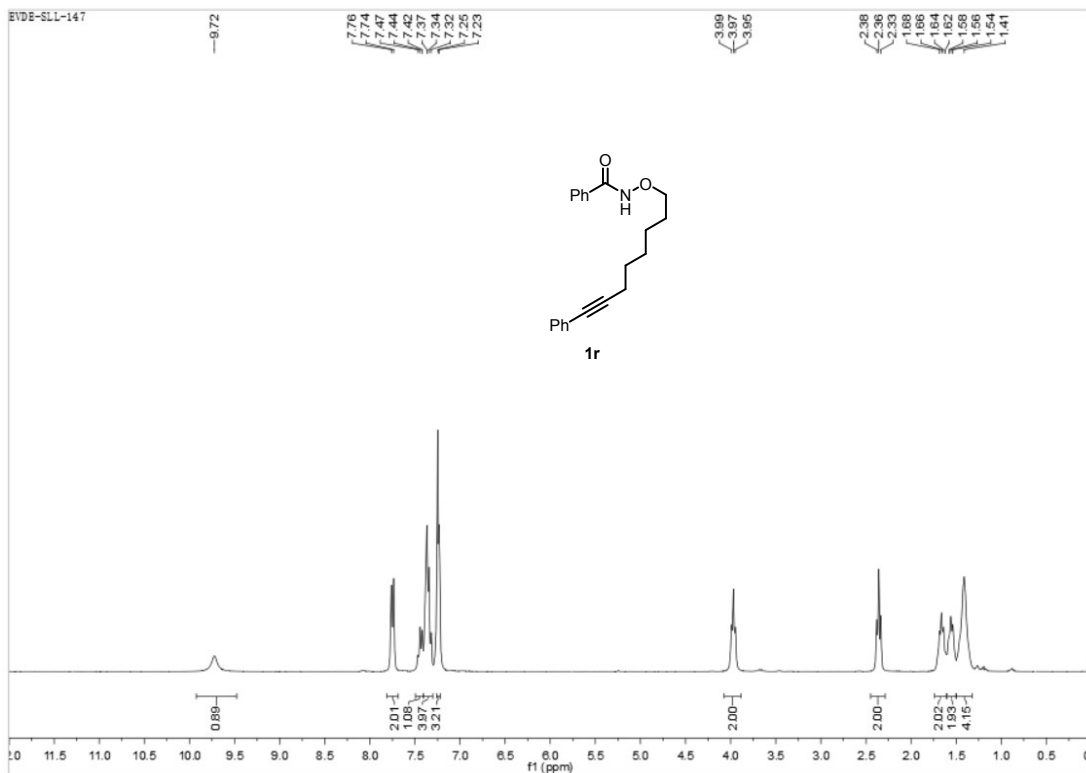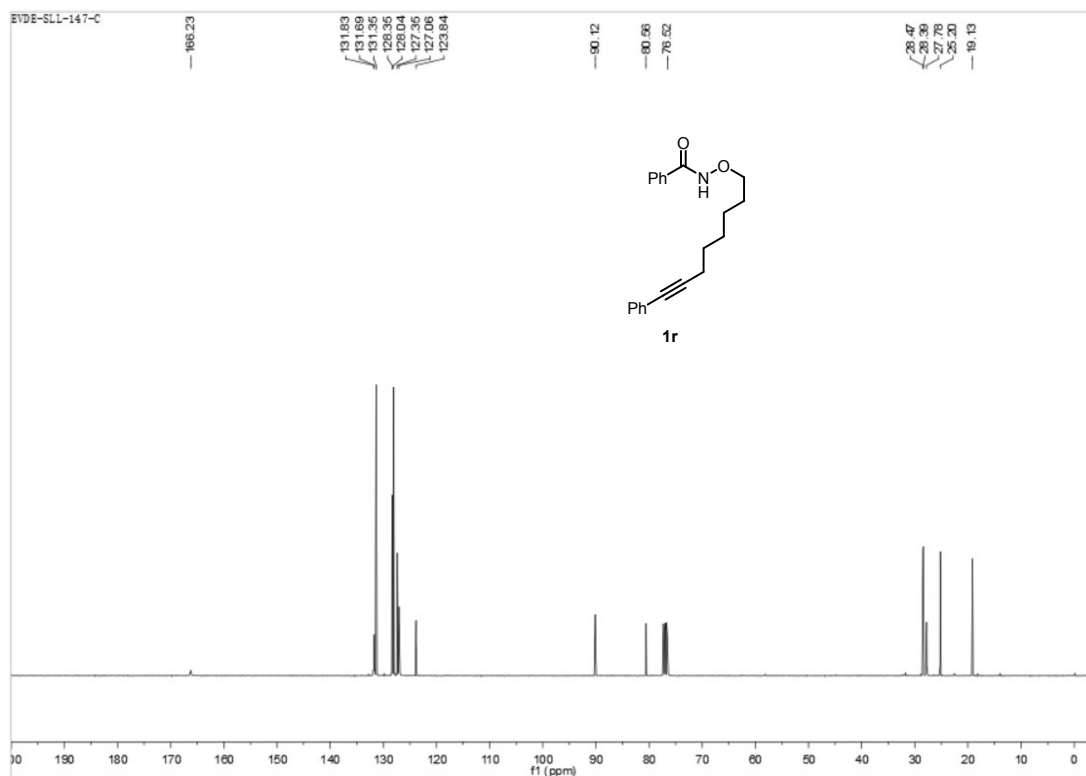

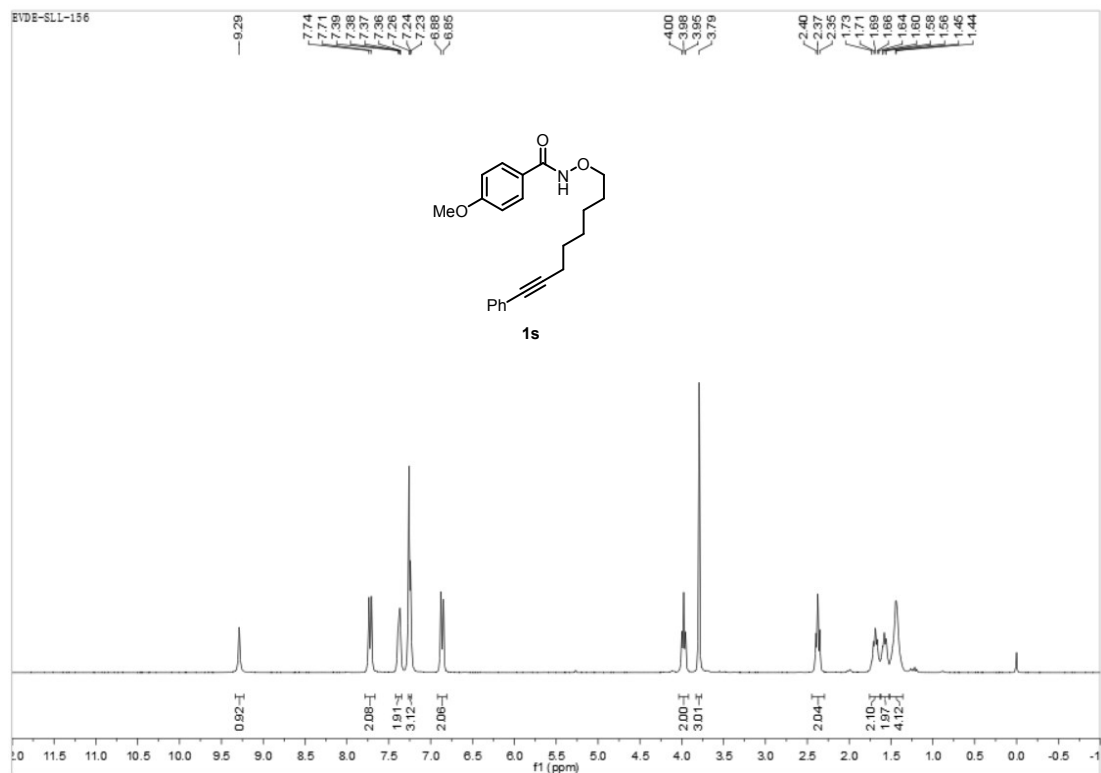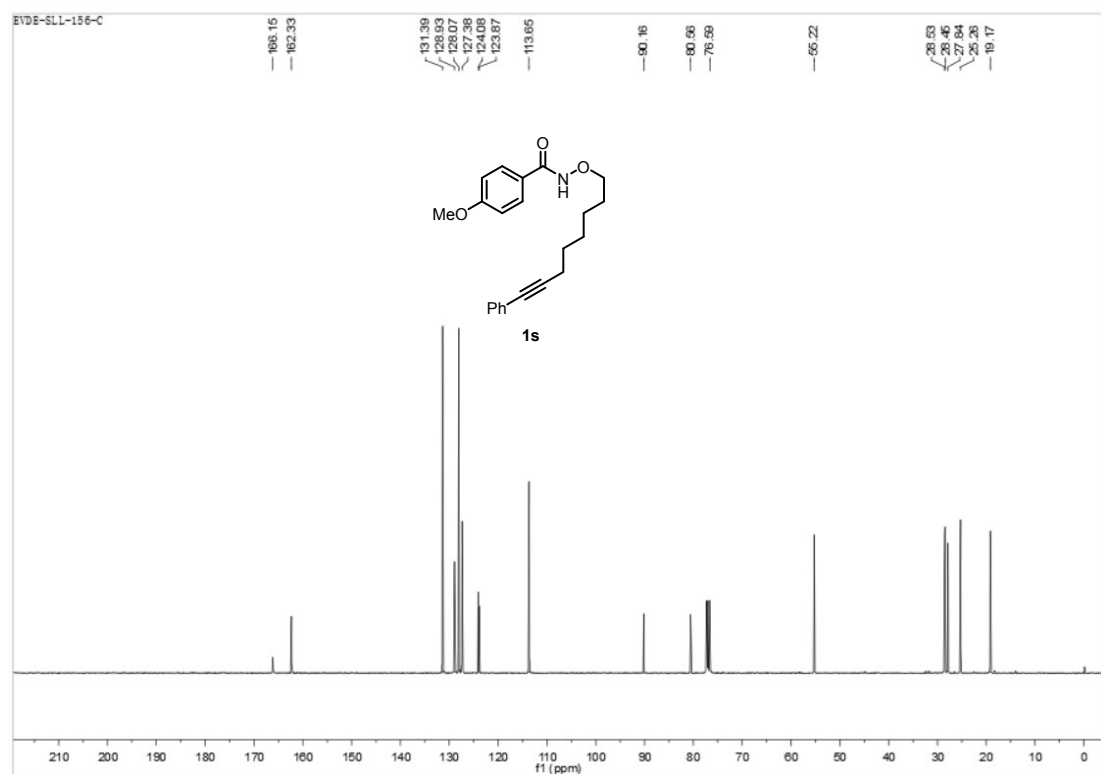

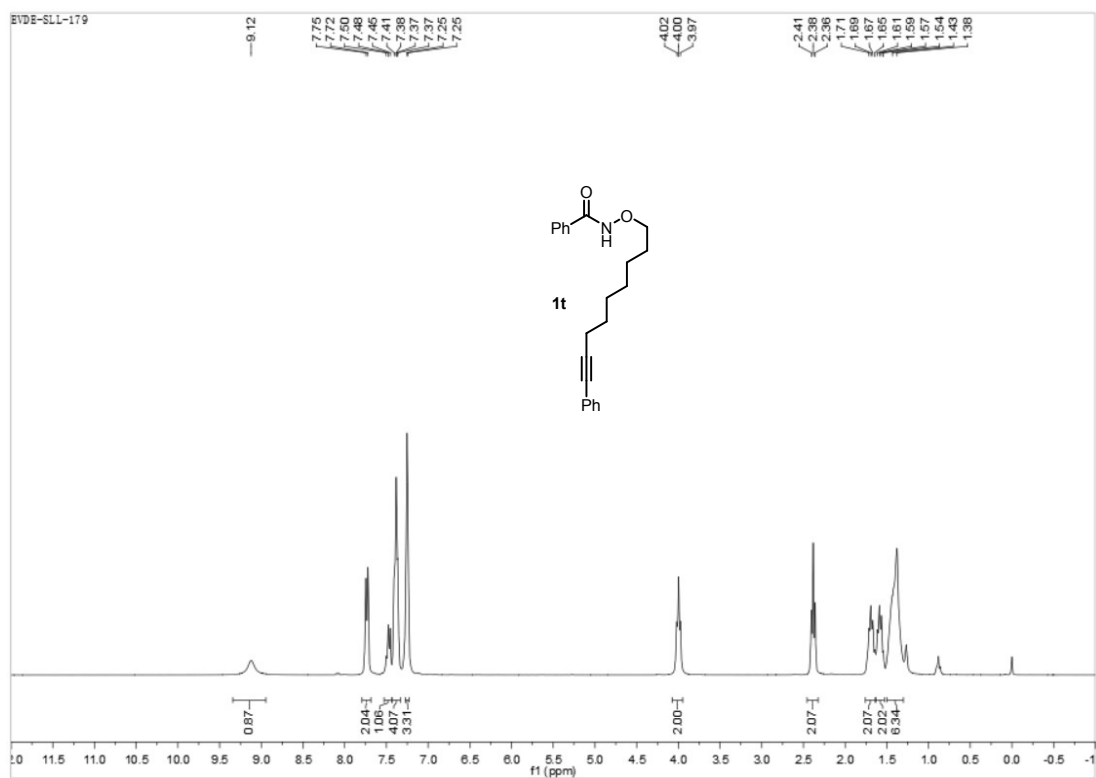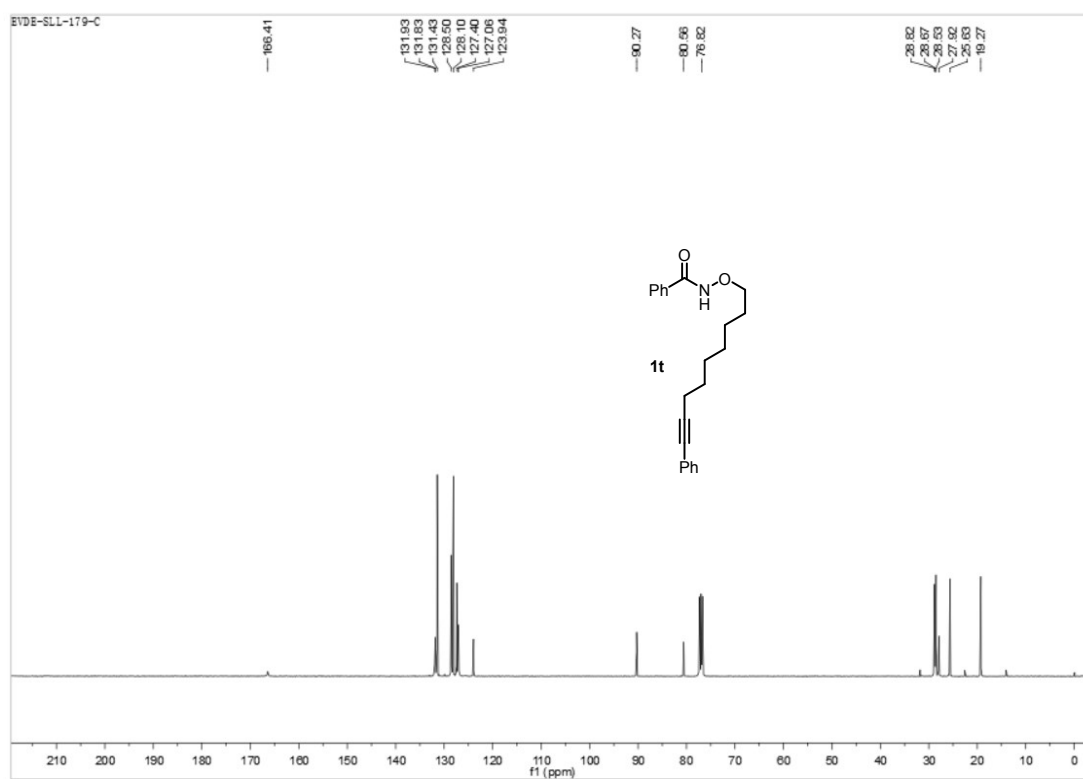

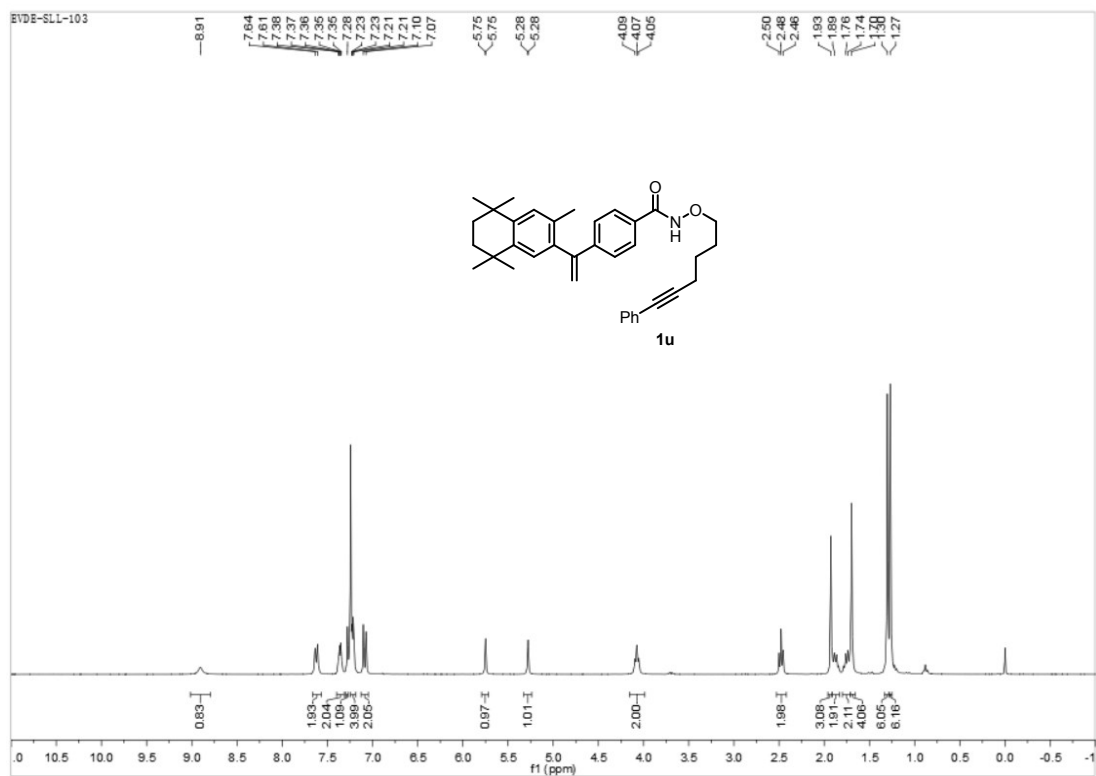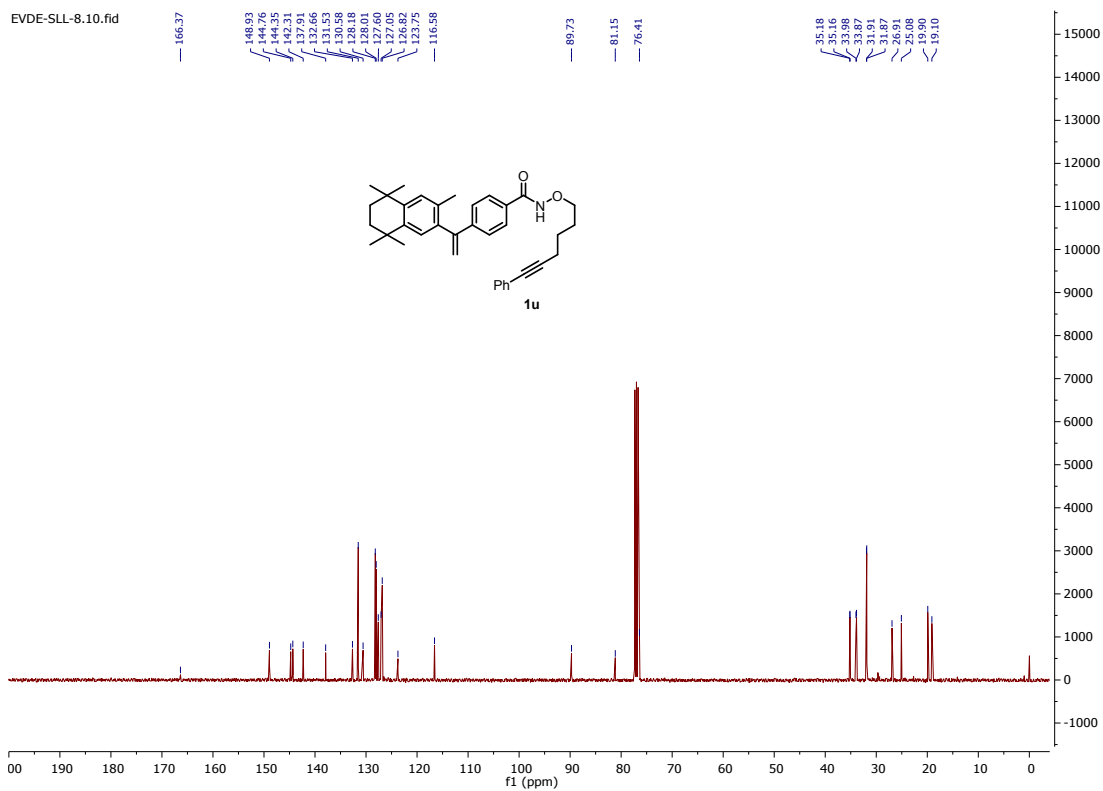



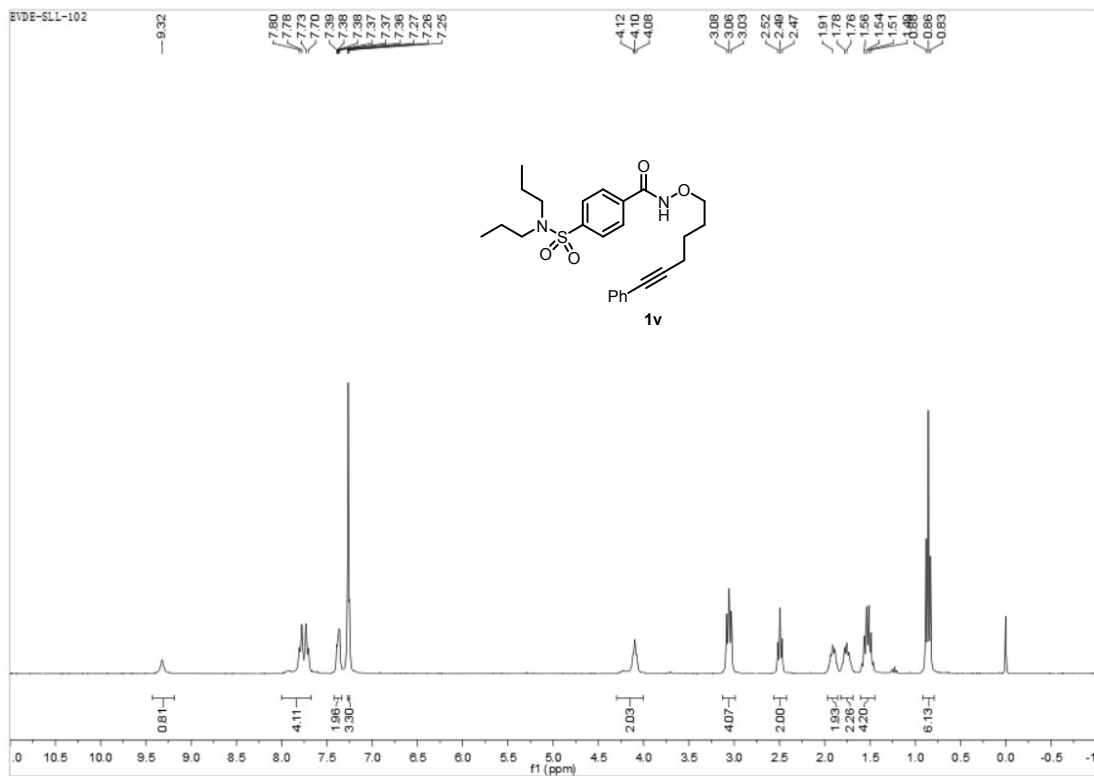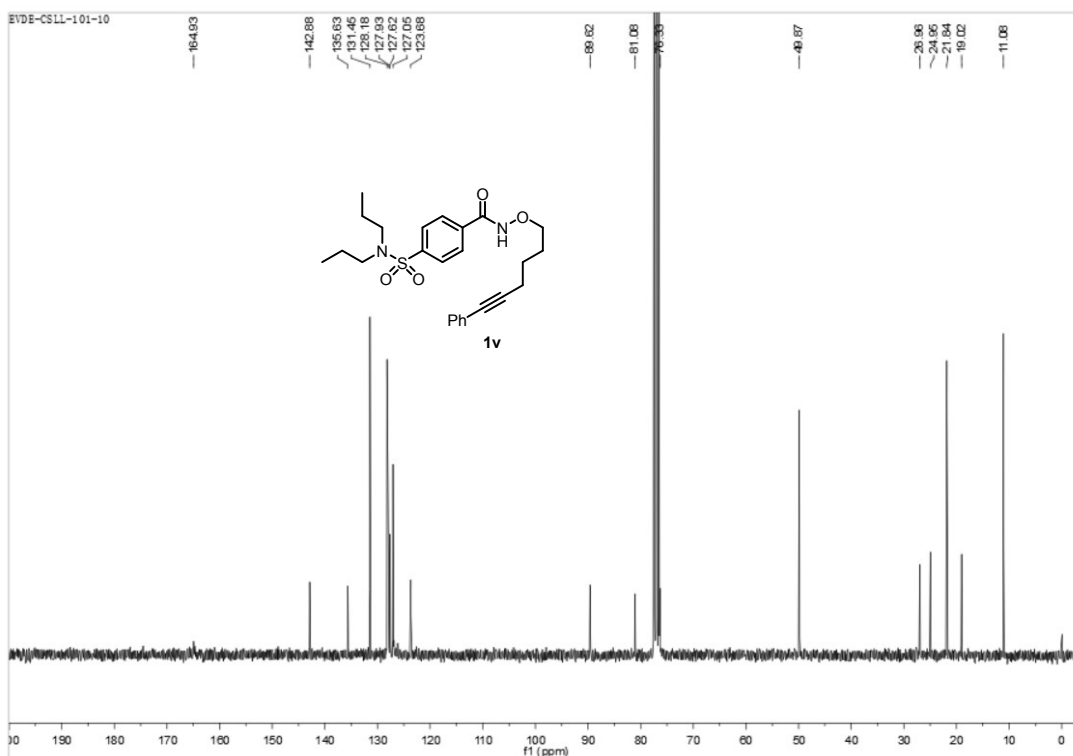

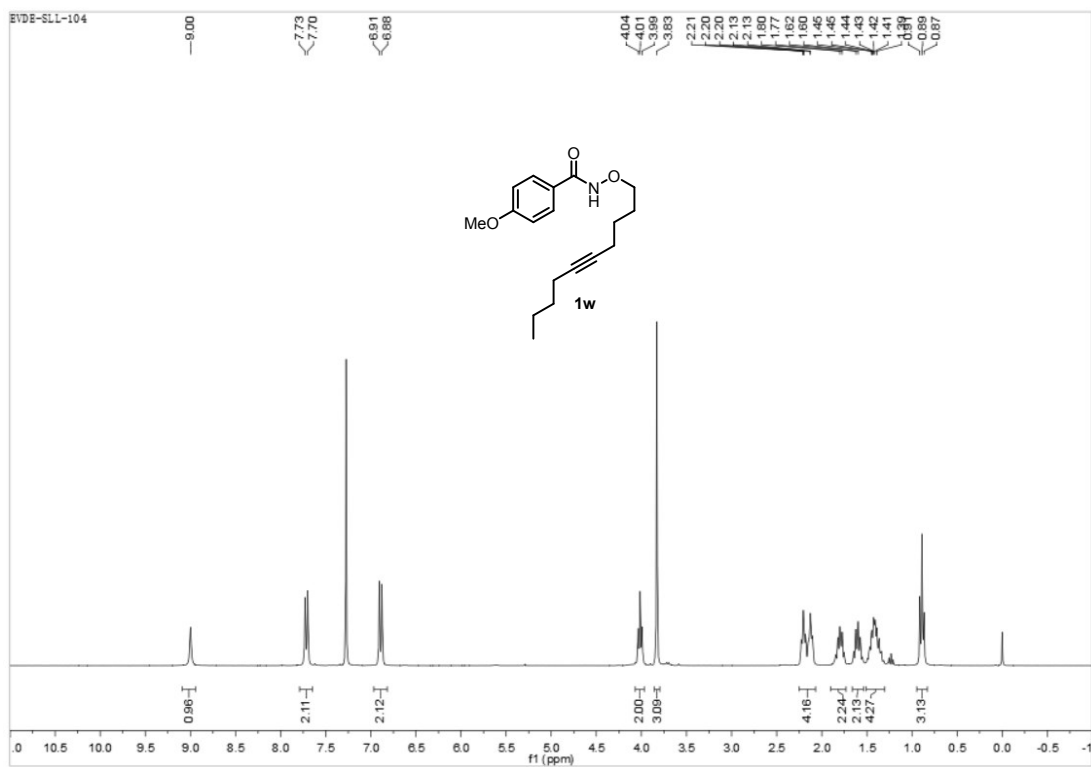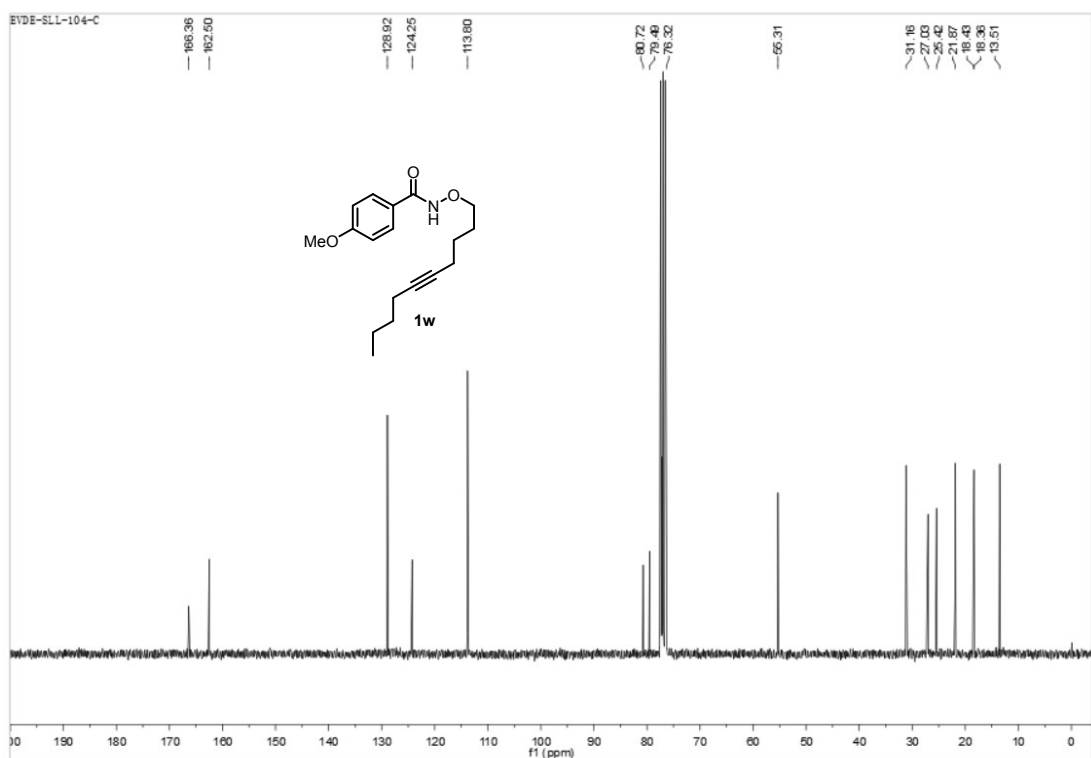

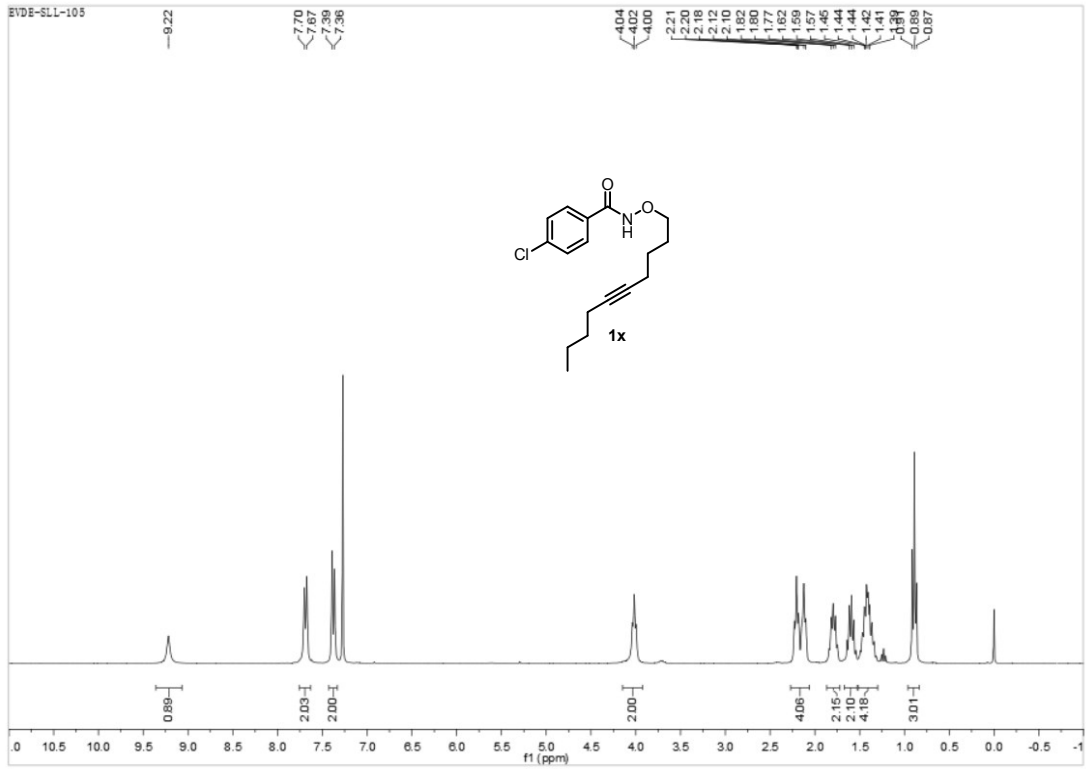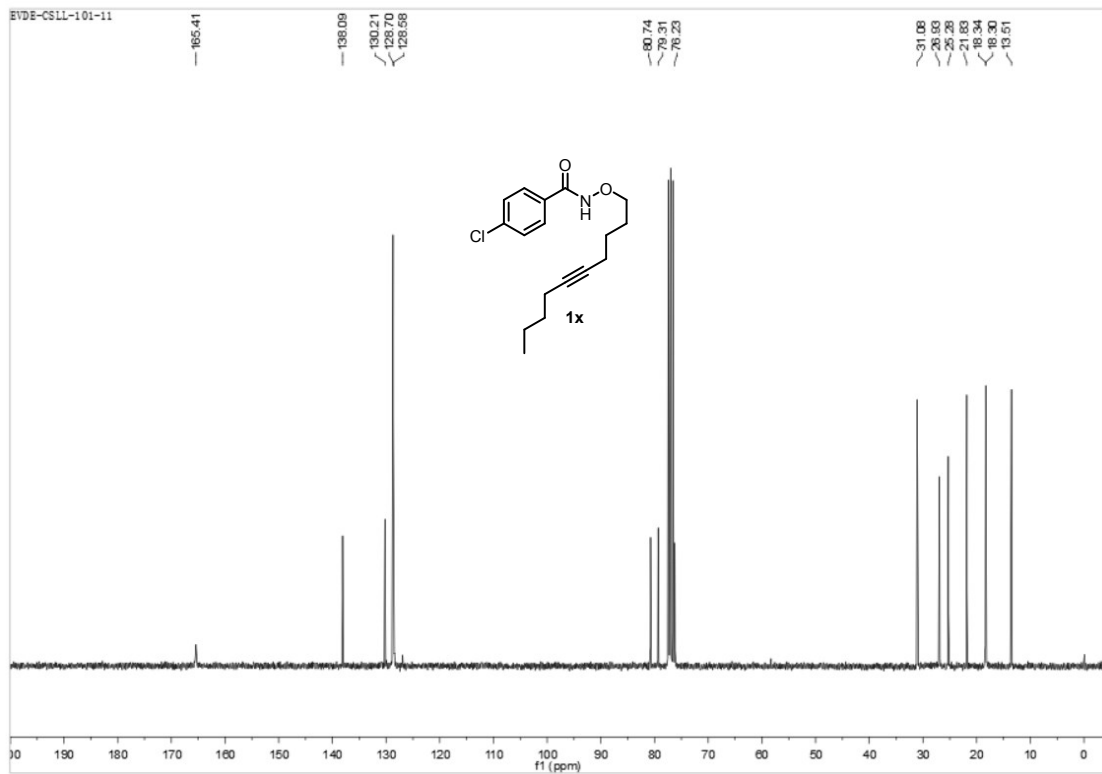

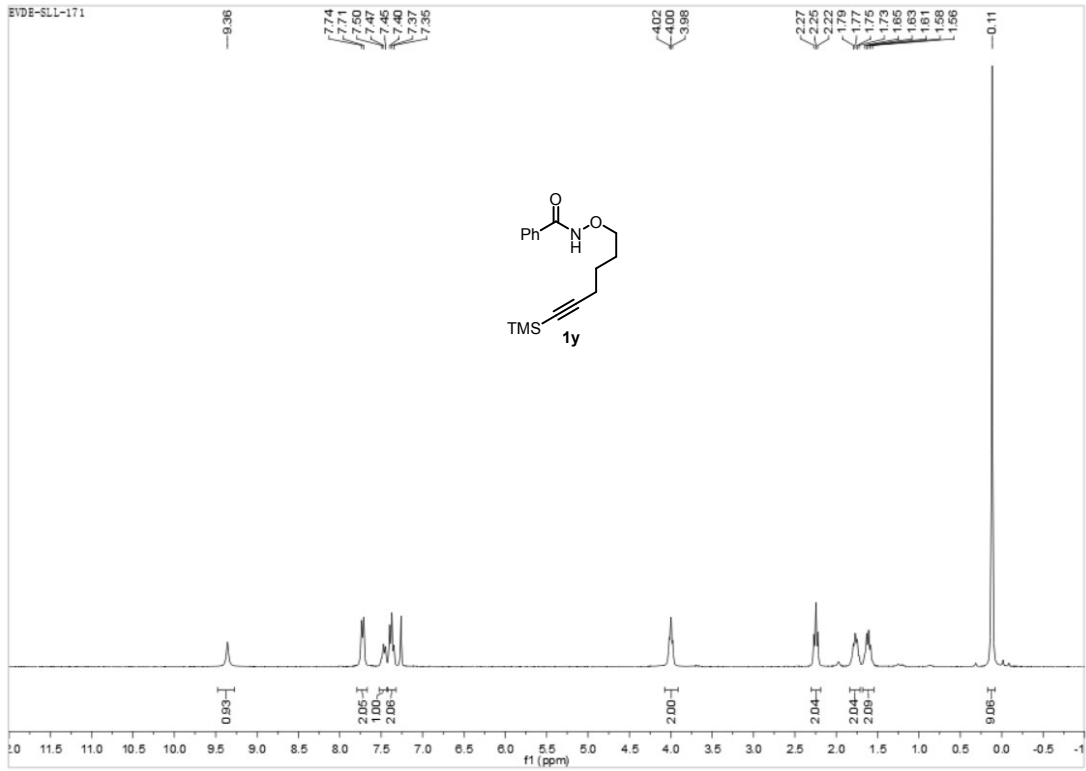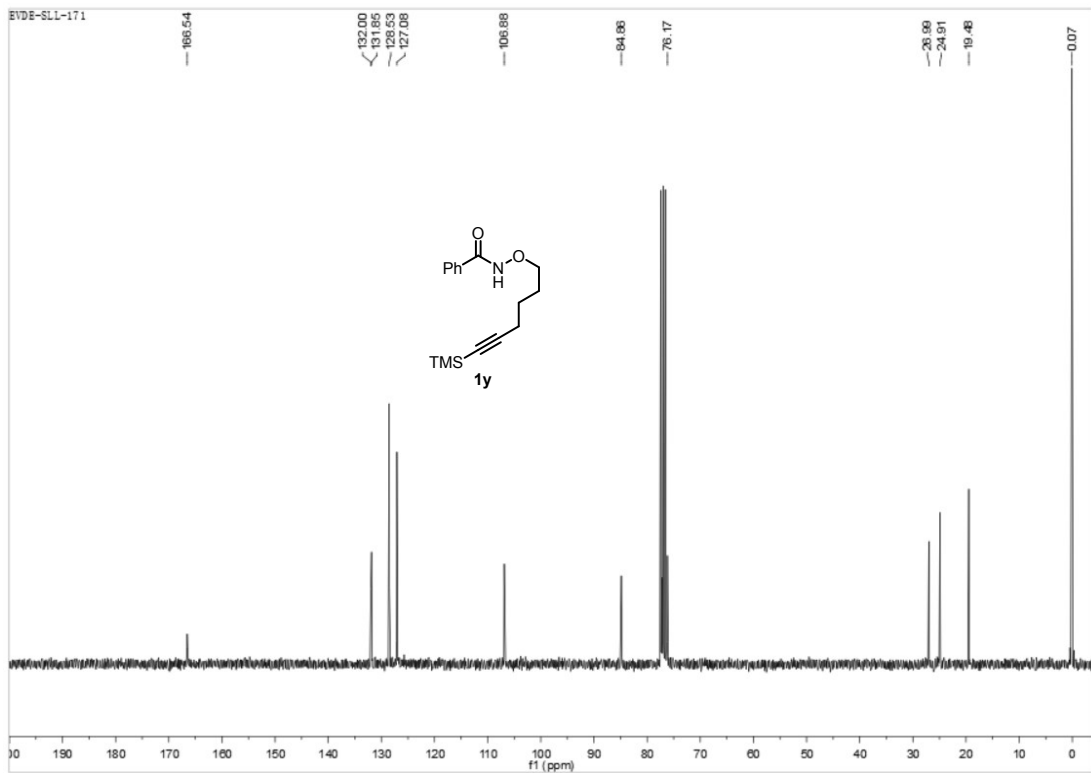

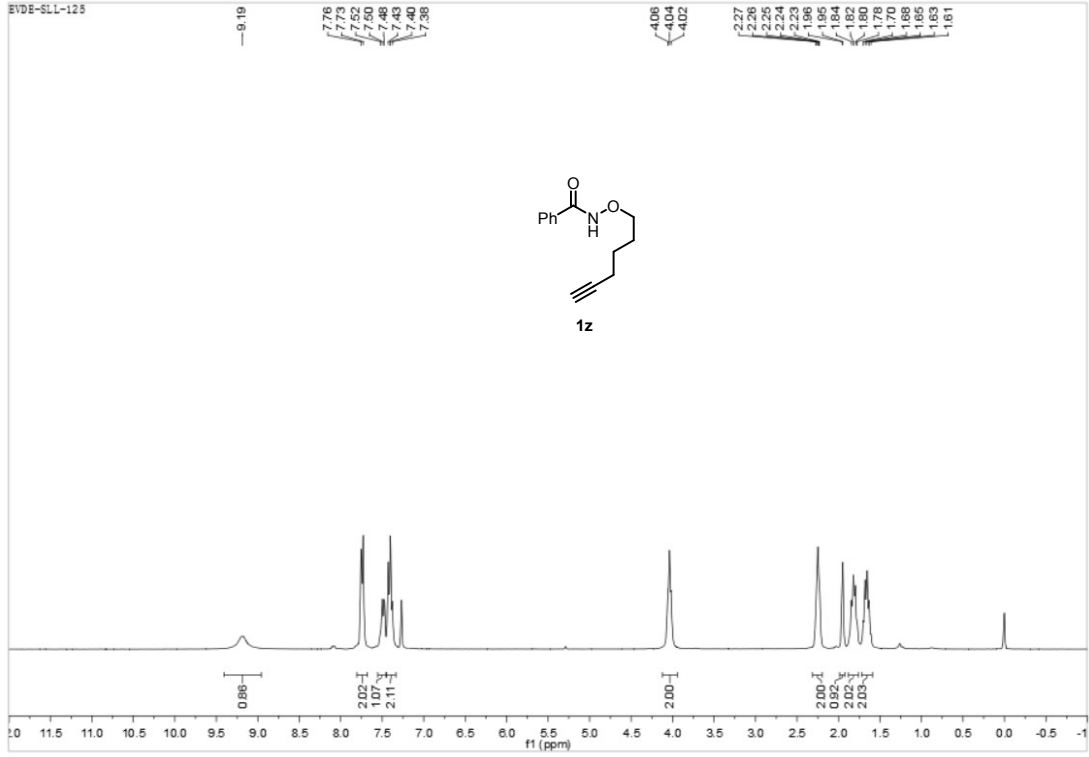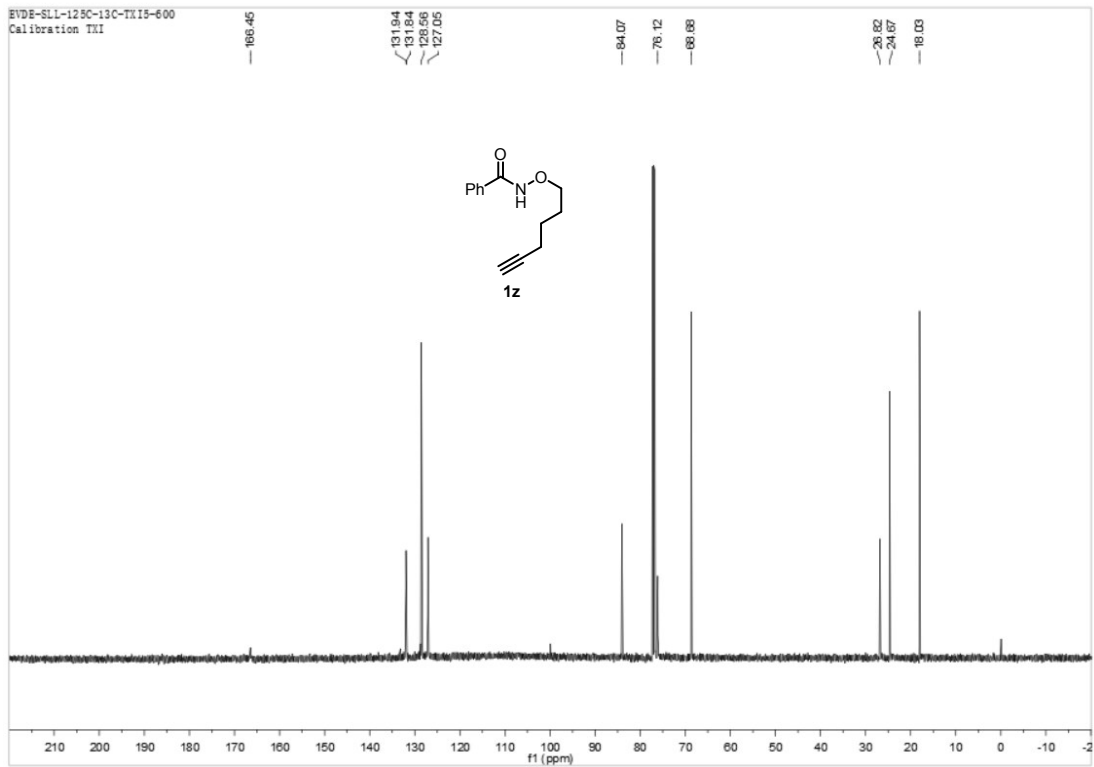

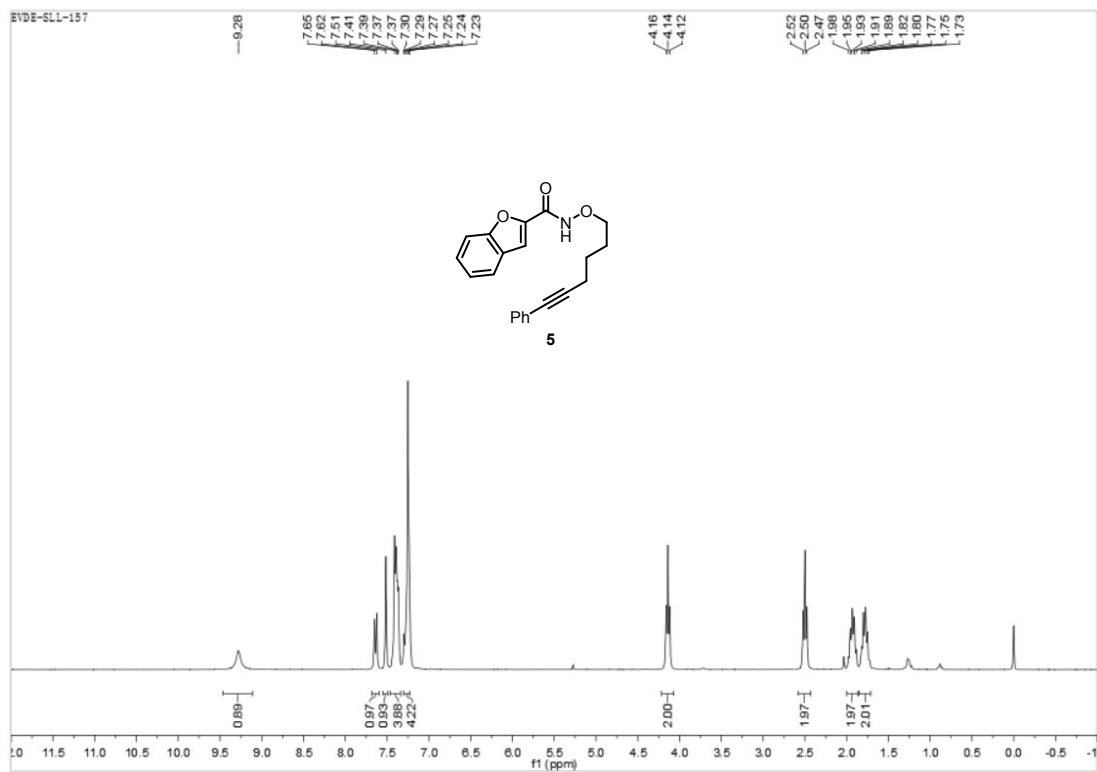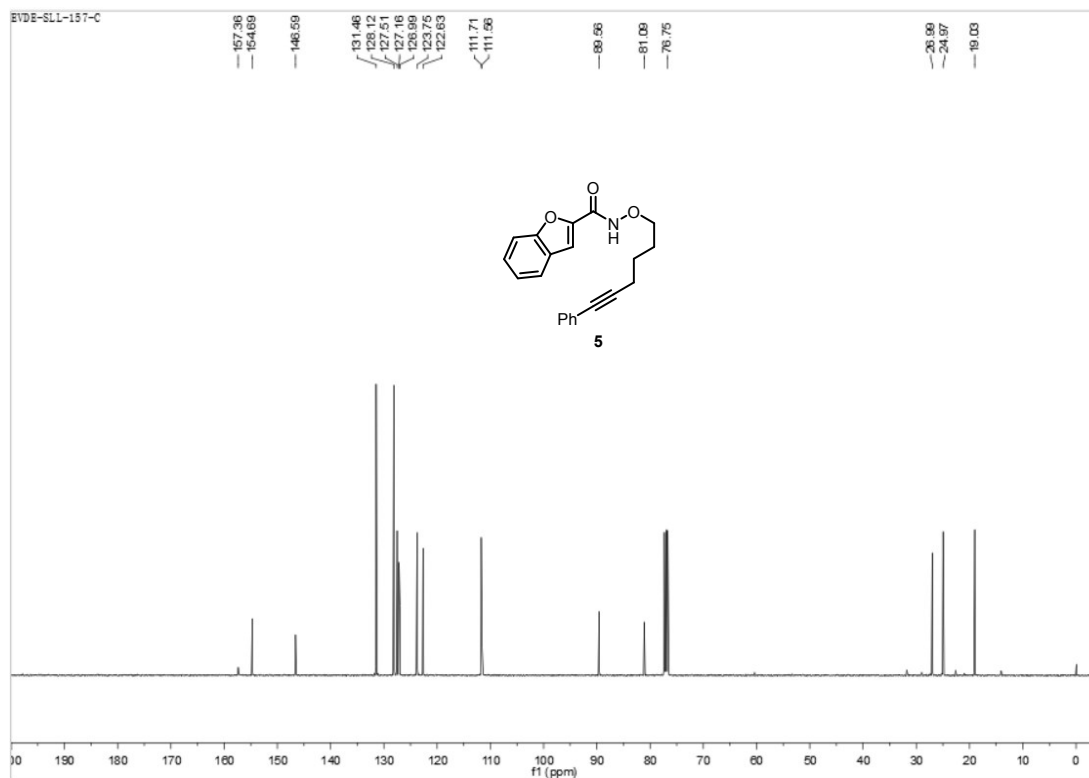

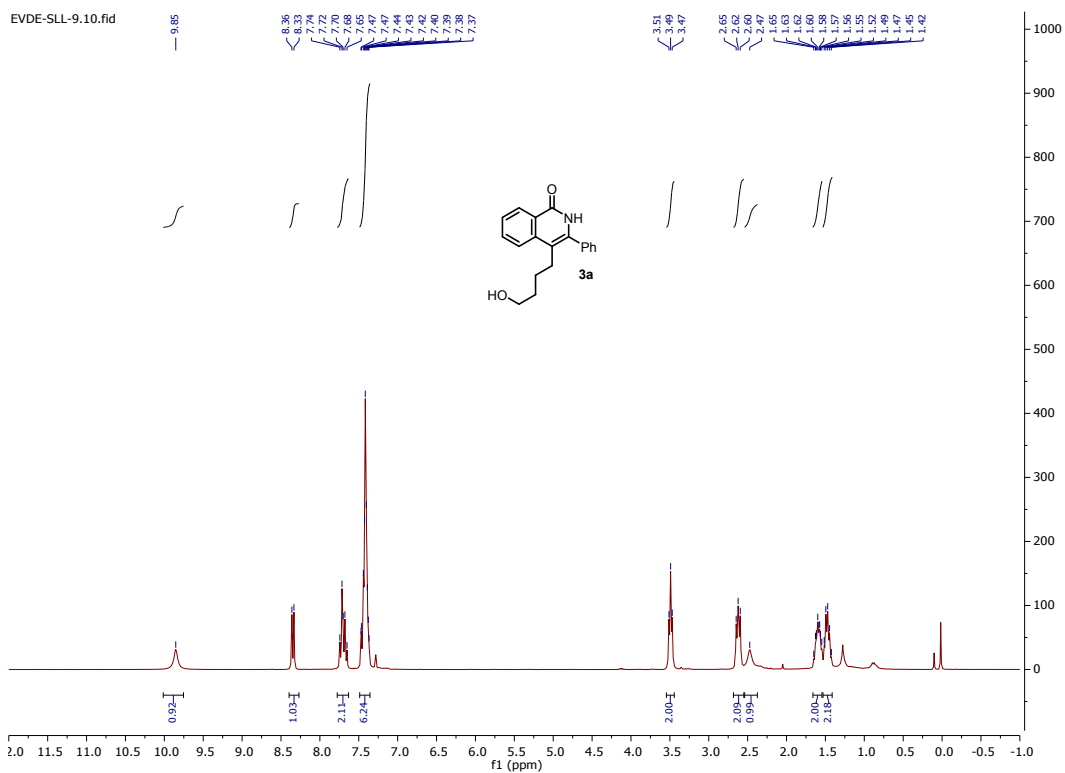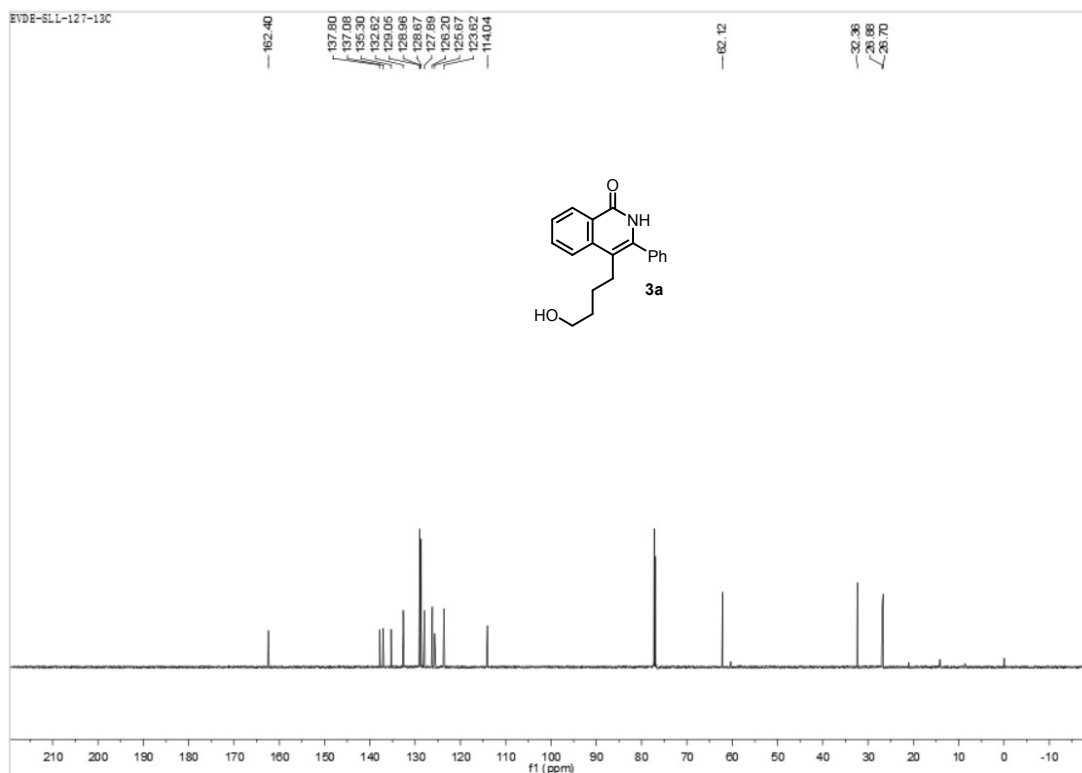

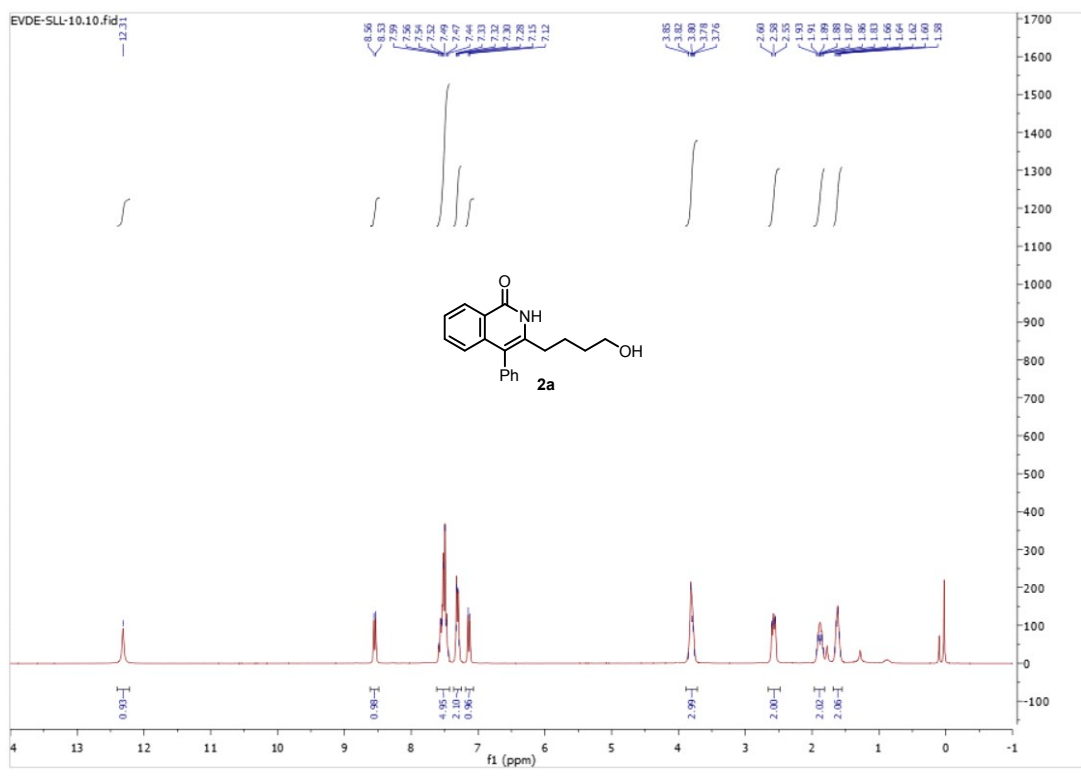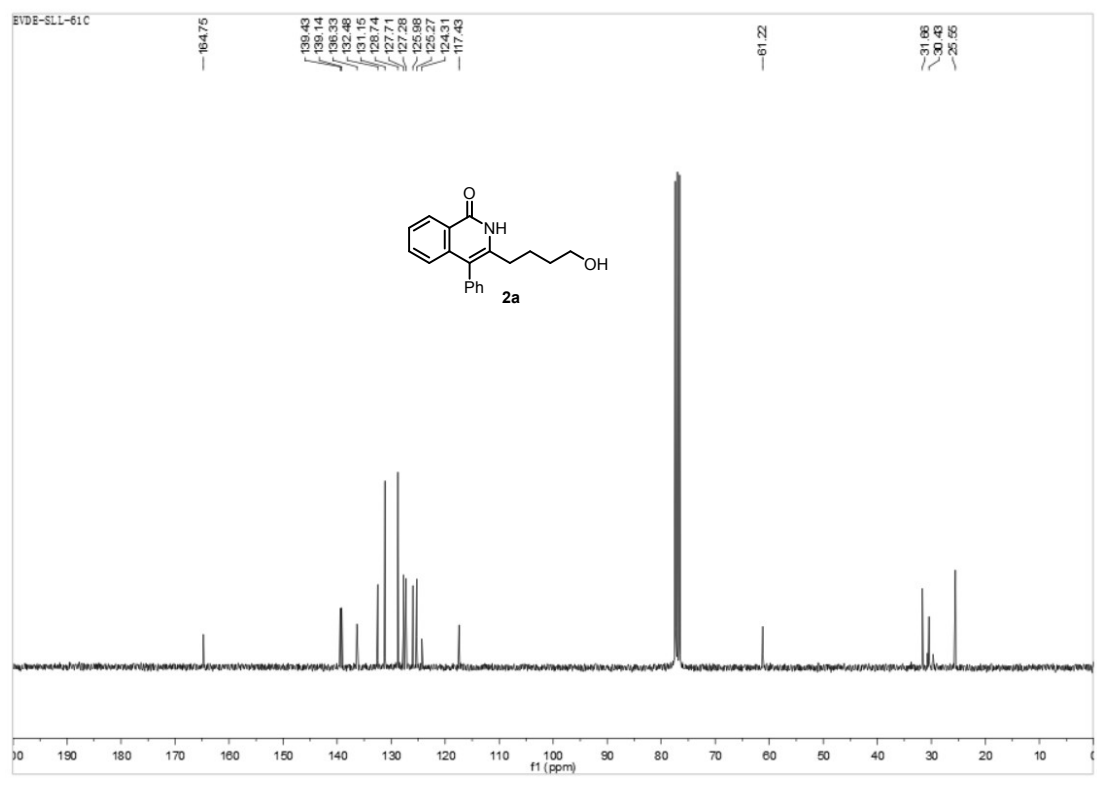



EVDE-SLL-11.10.fid

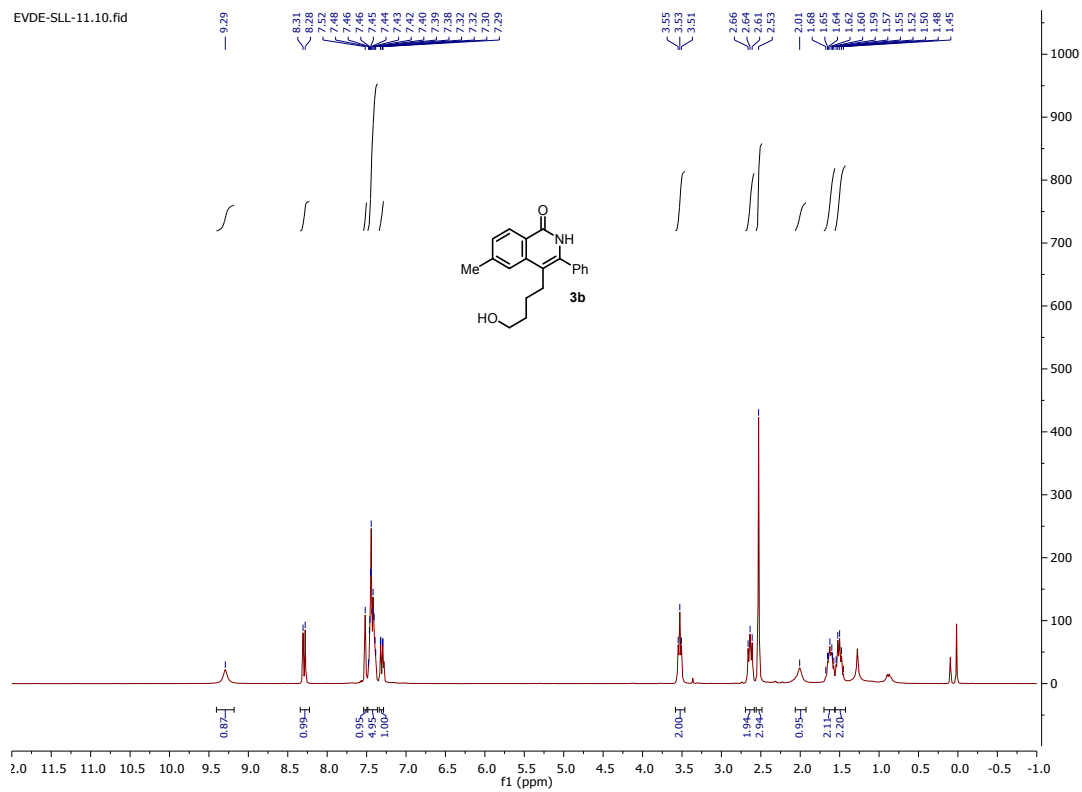

EVDE-s11-19-c

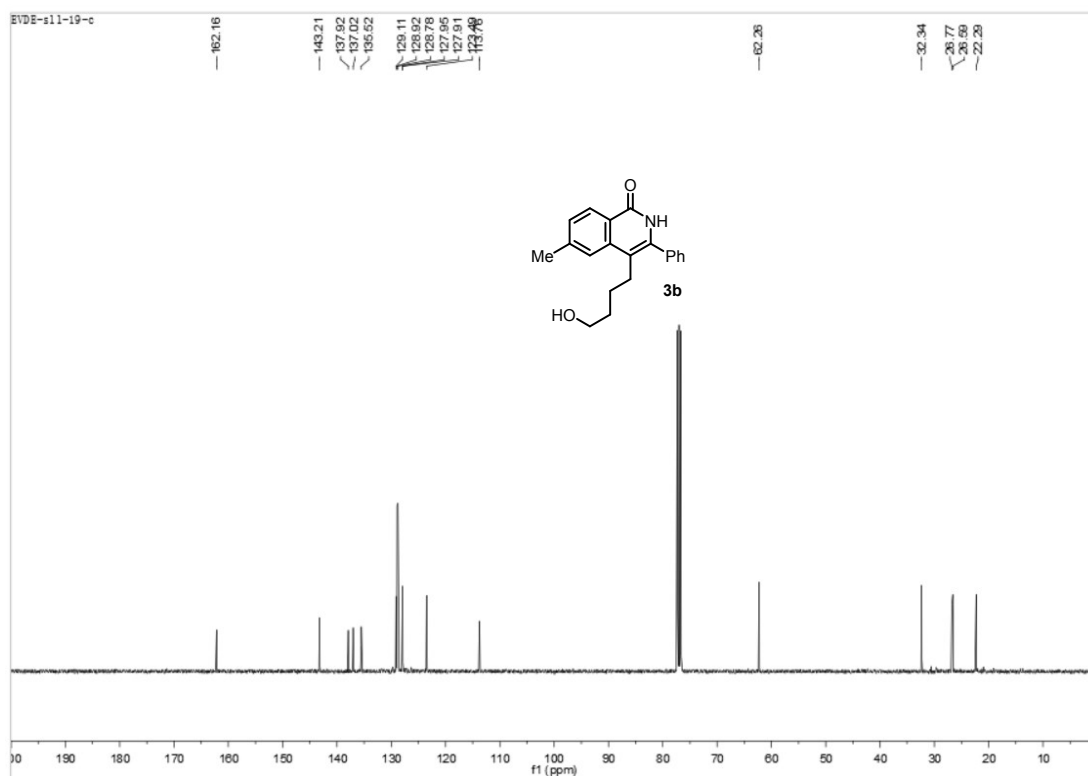

EVDE-SLL-12.30.fid

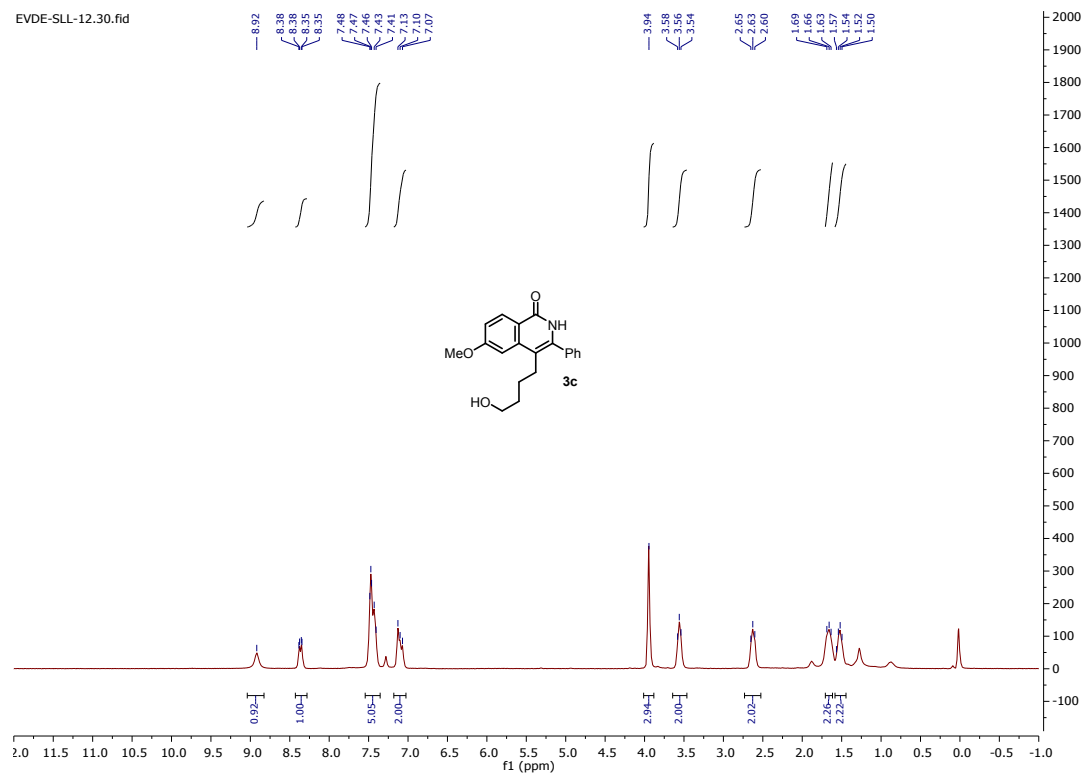

EVDE-SLL-191C

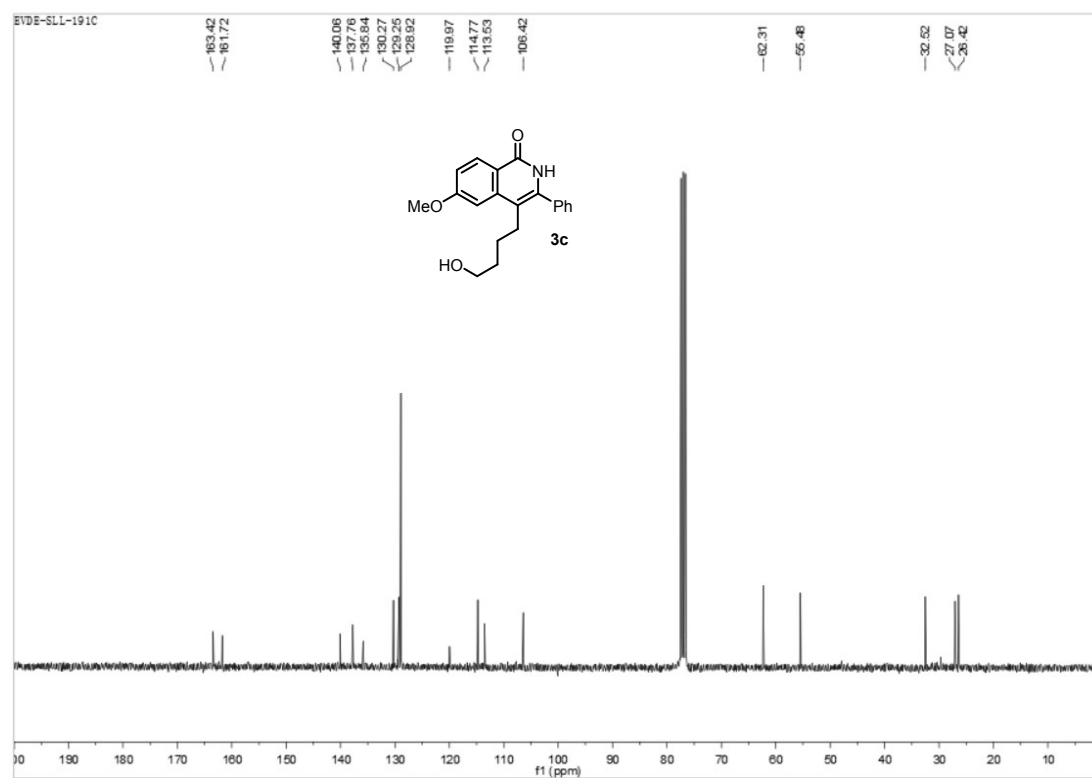

EVDE-SLL-12.10.fid

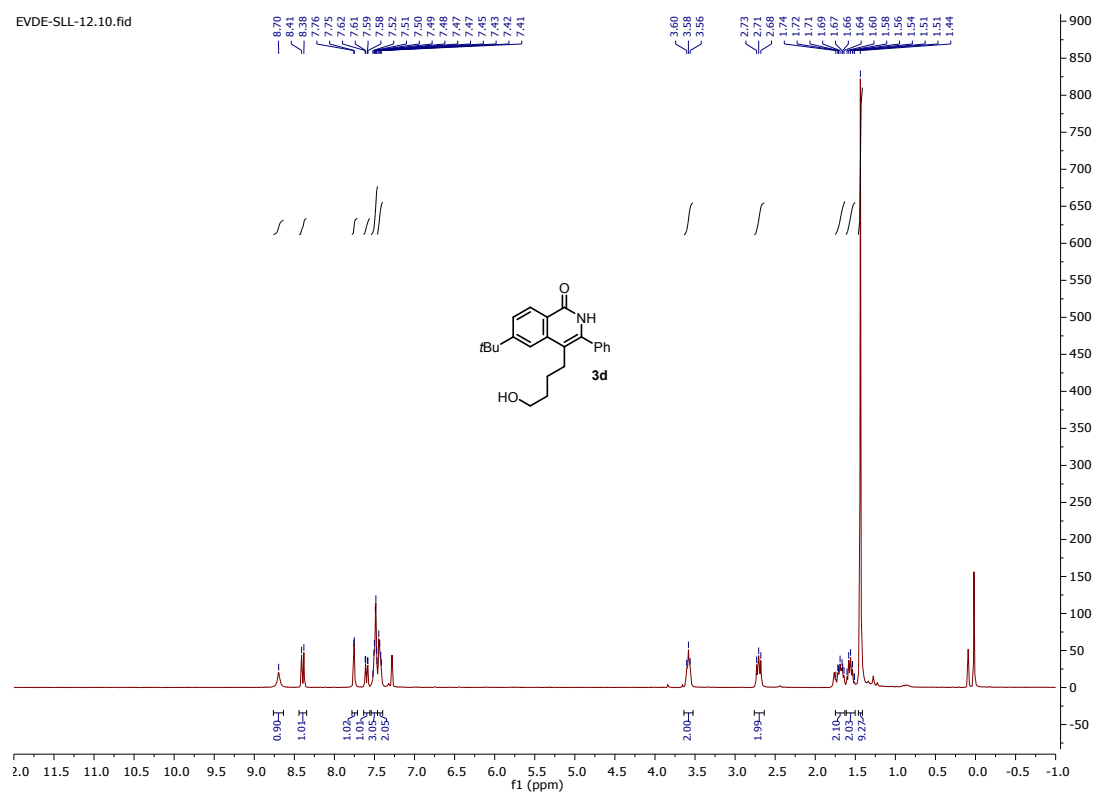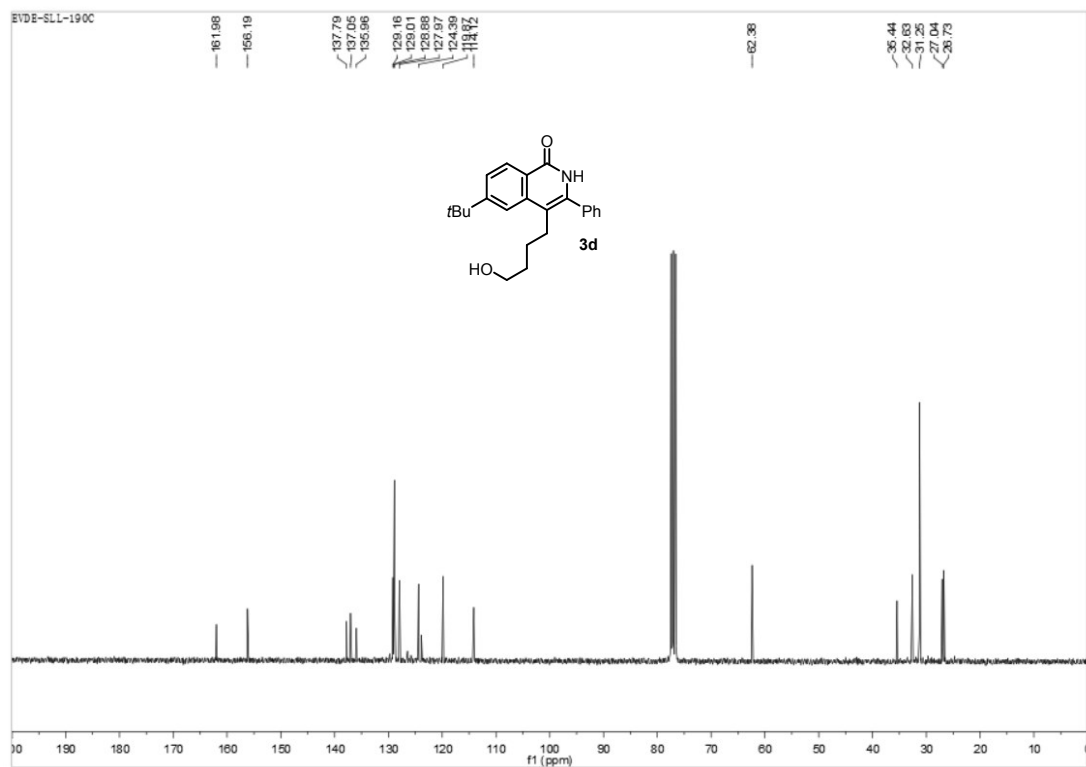

EVDE-SLL-14.10.fid

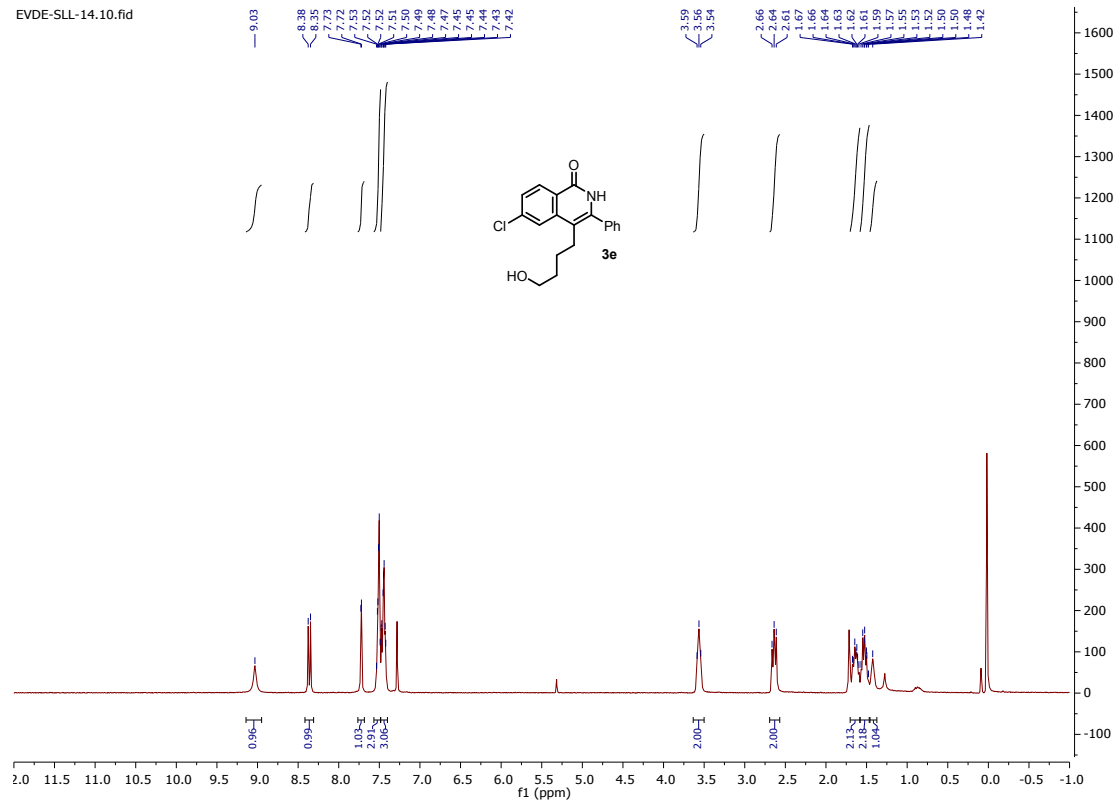

EVDE-SLL-24-c

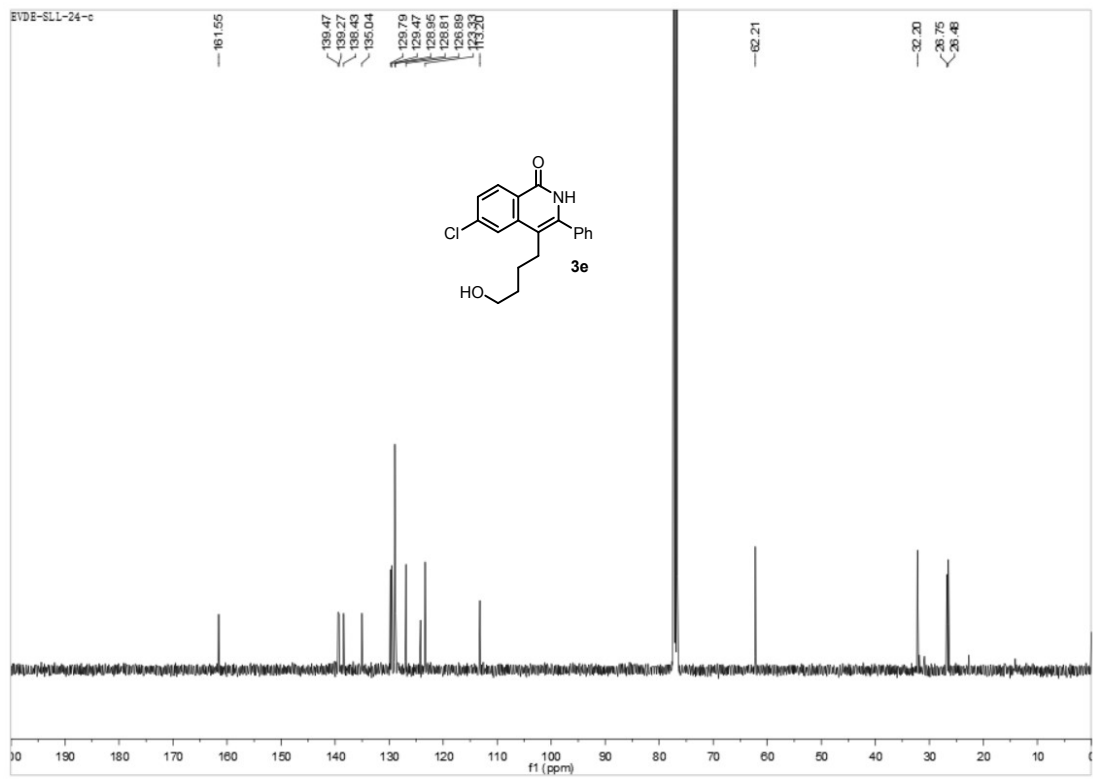

EVDE-SLL-15.10.fid

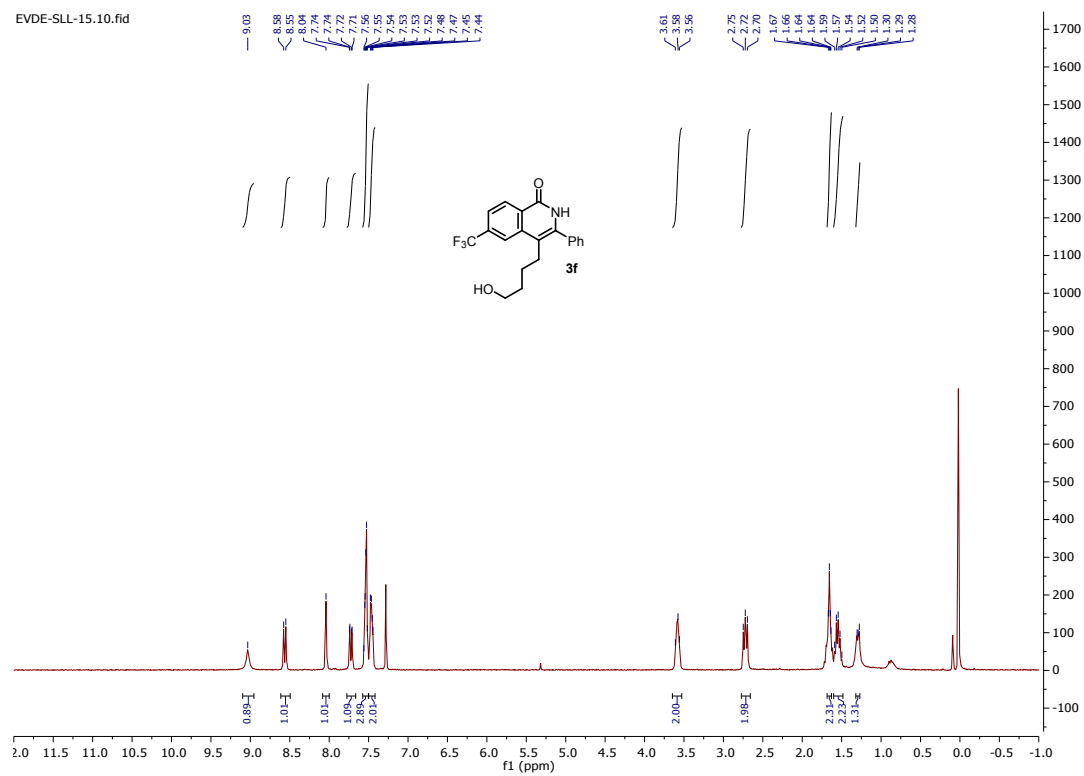

EVDE-SLL-33C

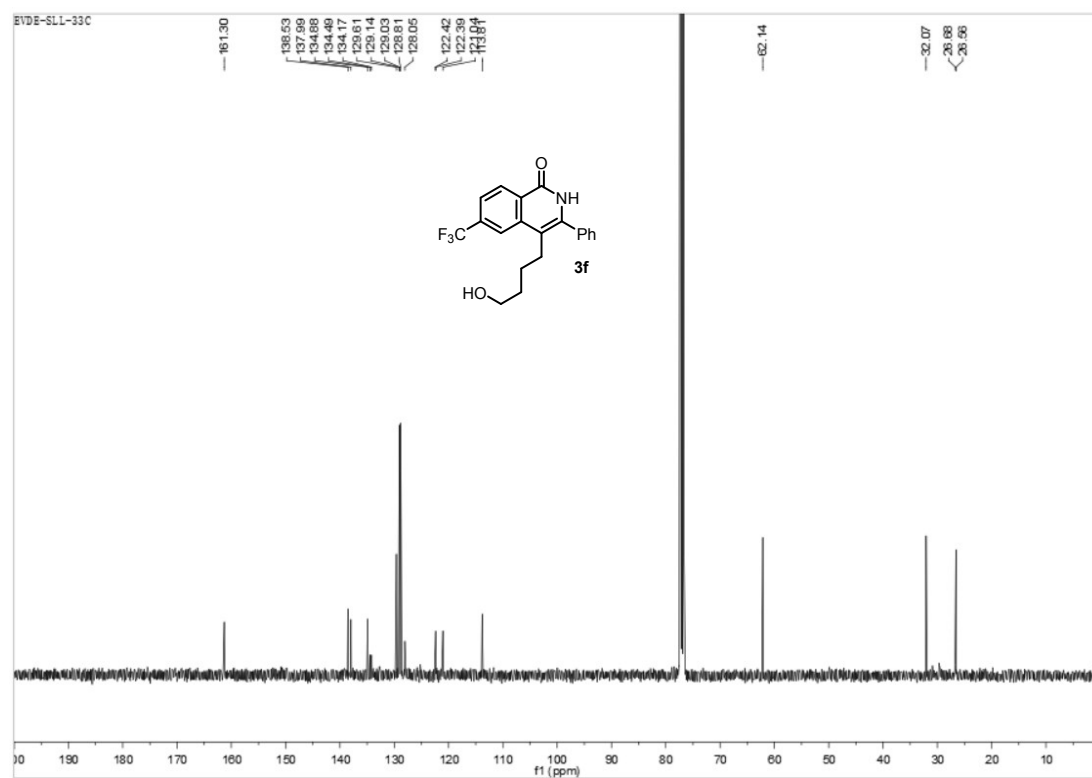

evde-sll-3-f.20.fid

62.95

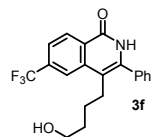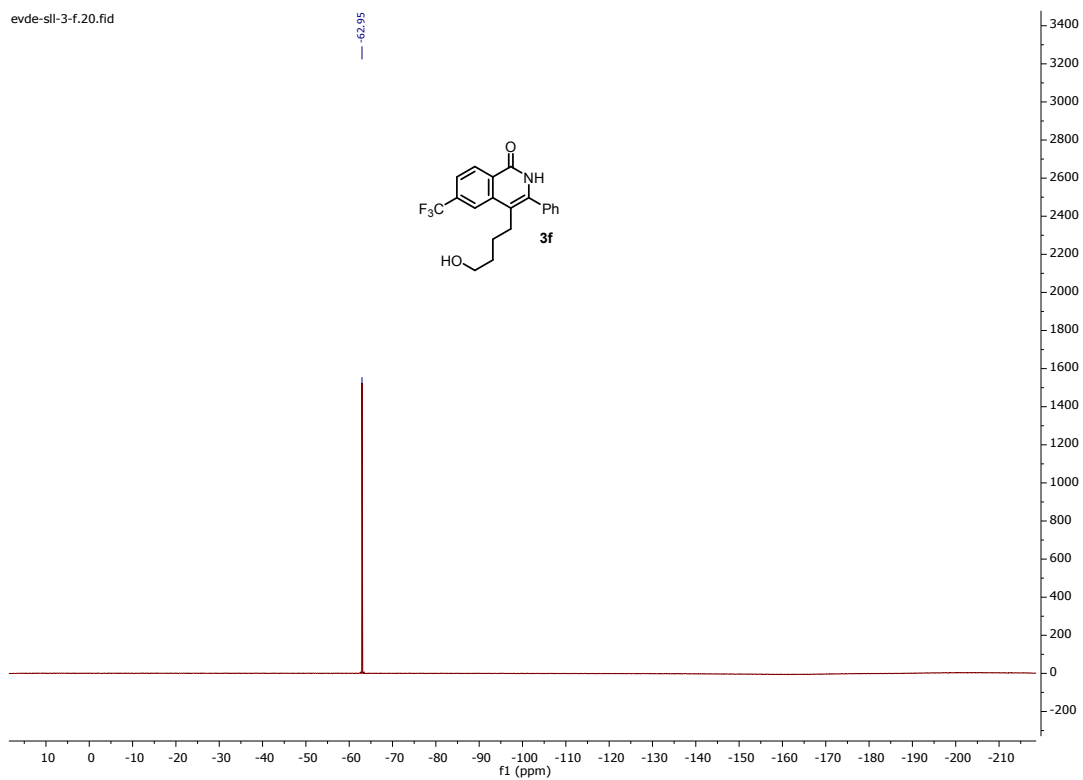

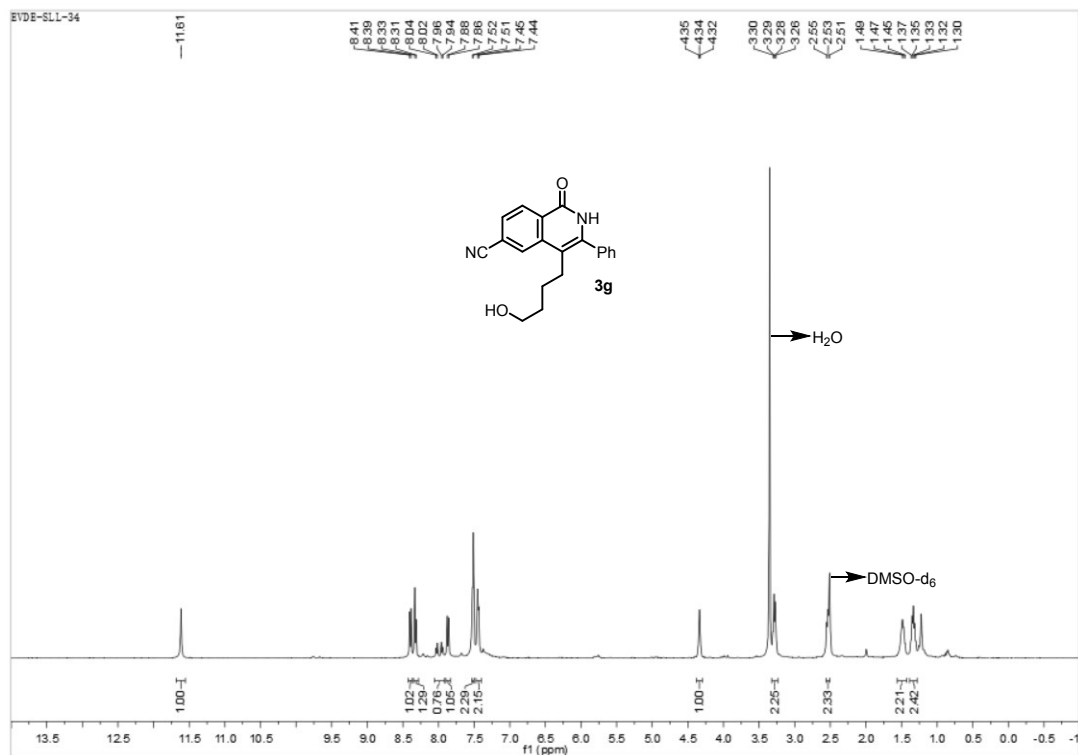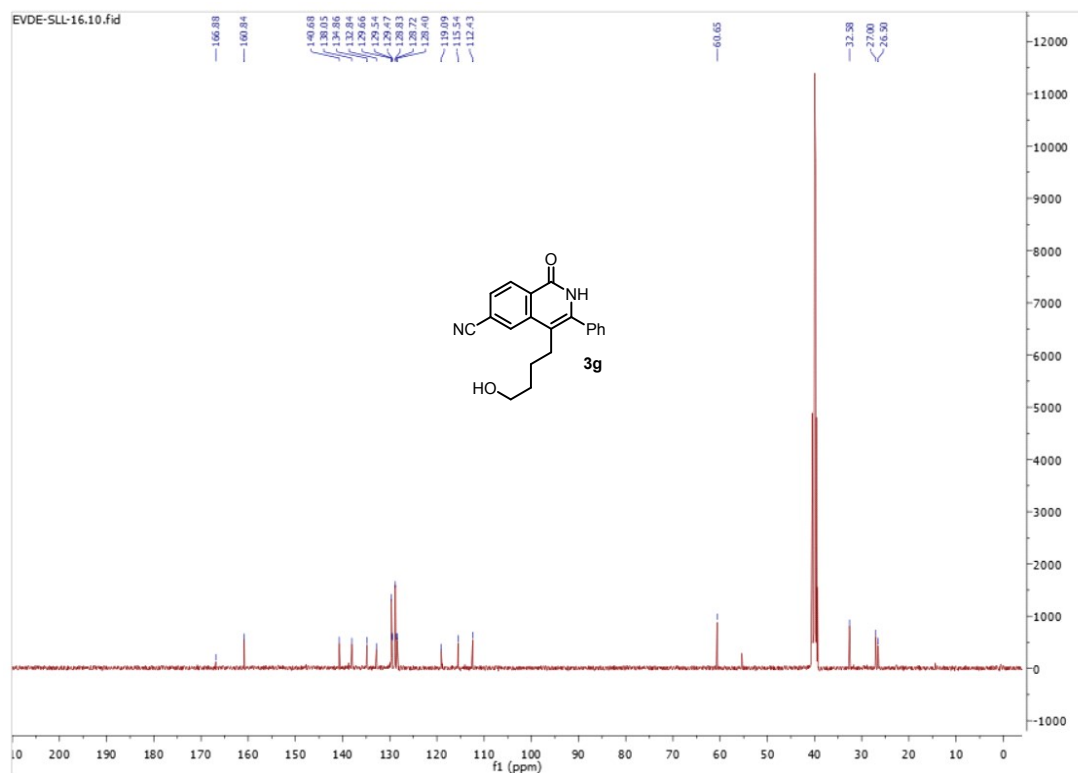

EVDE-SLL-17.10.fid

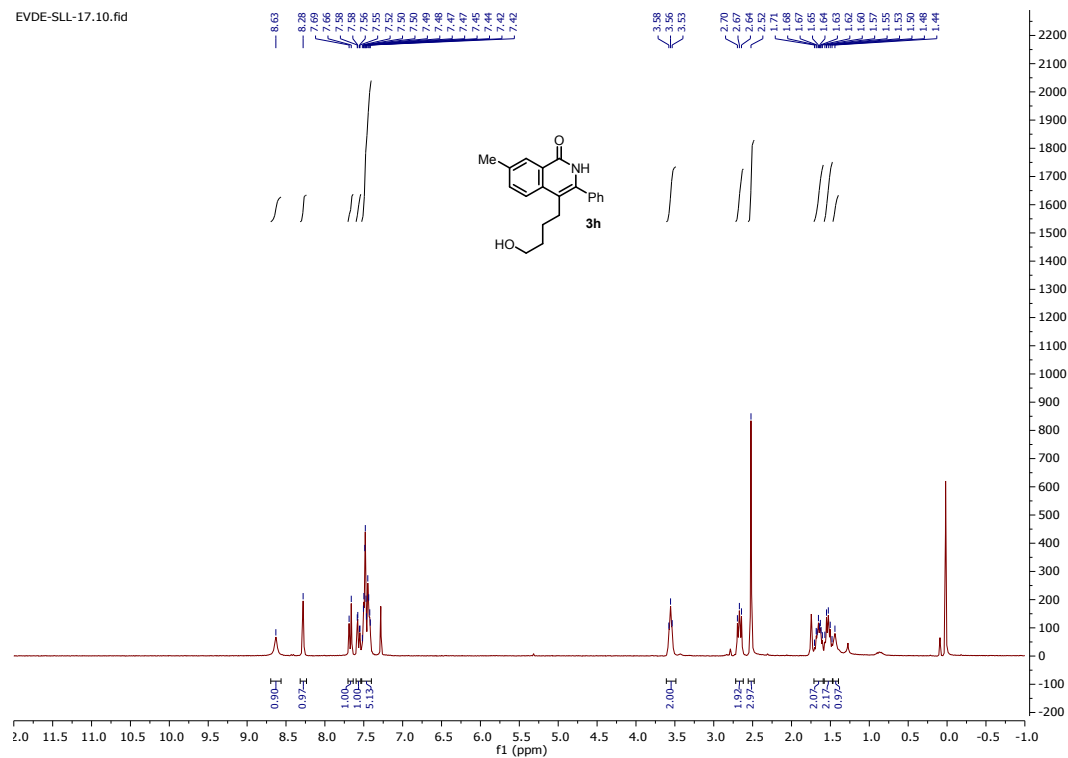

EVDE-SLL-23-C

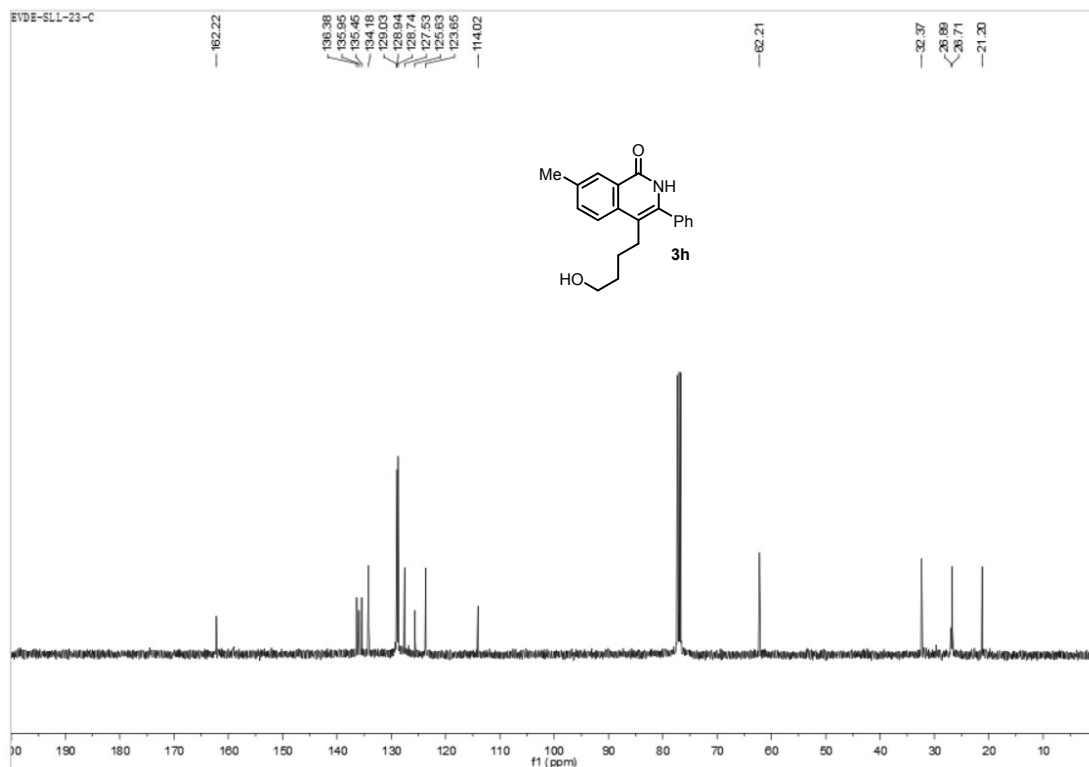



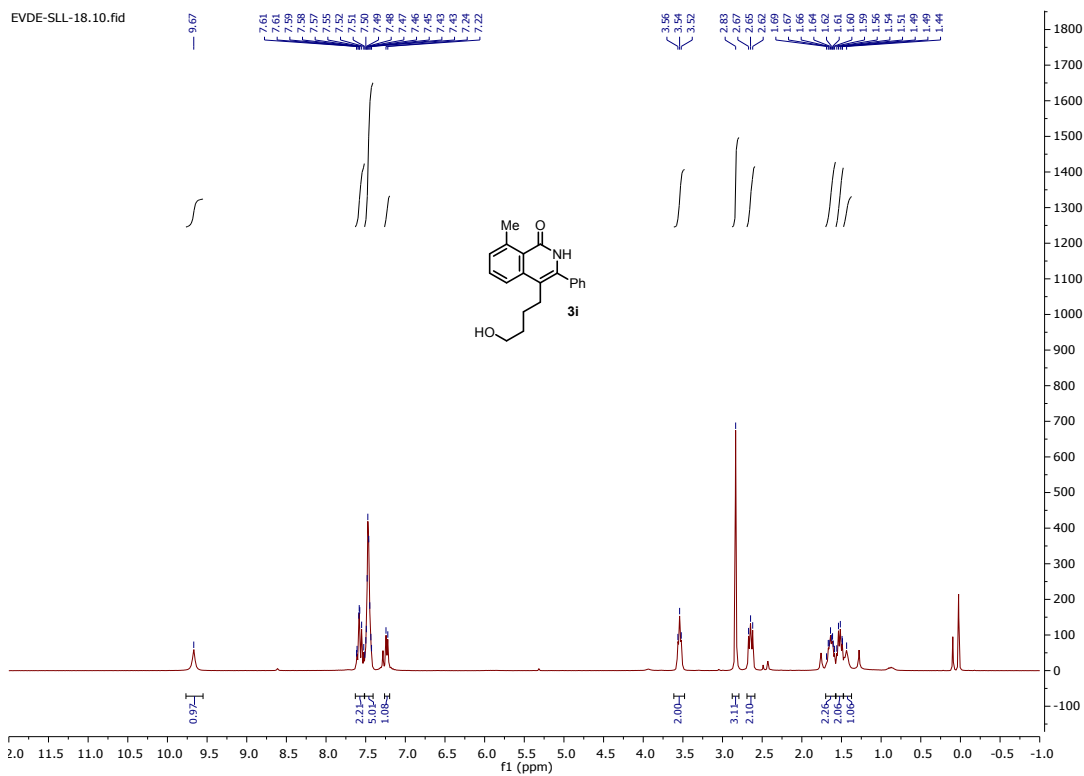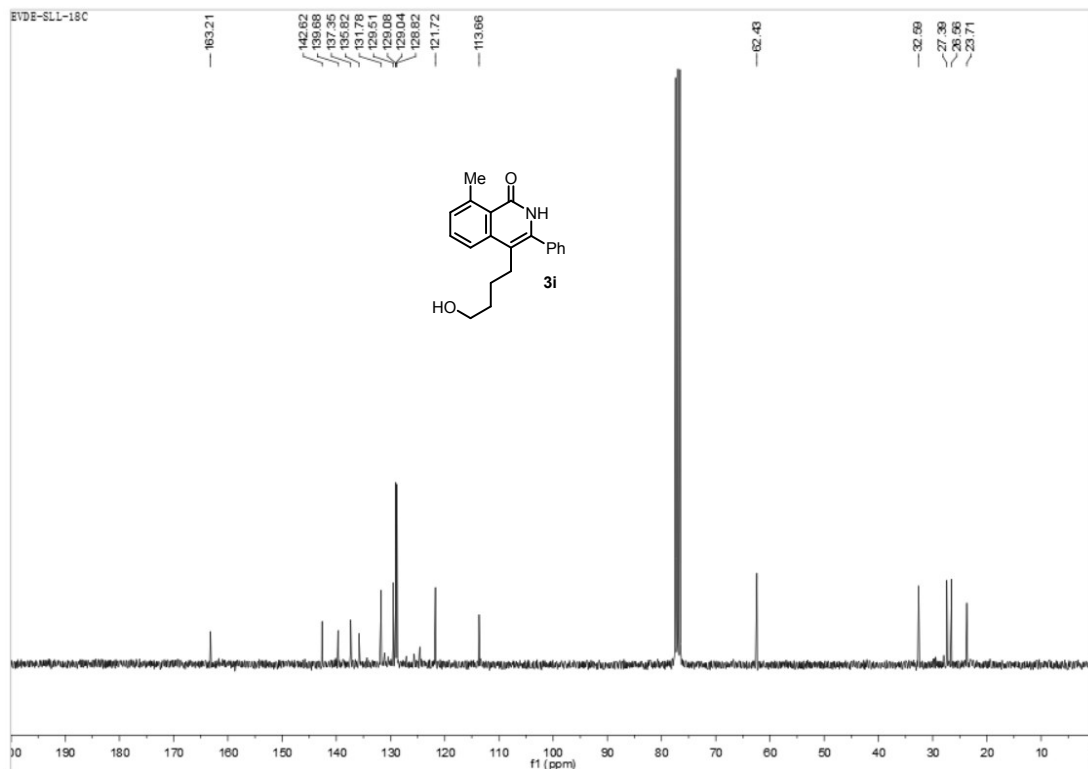

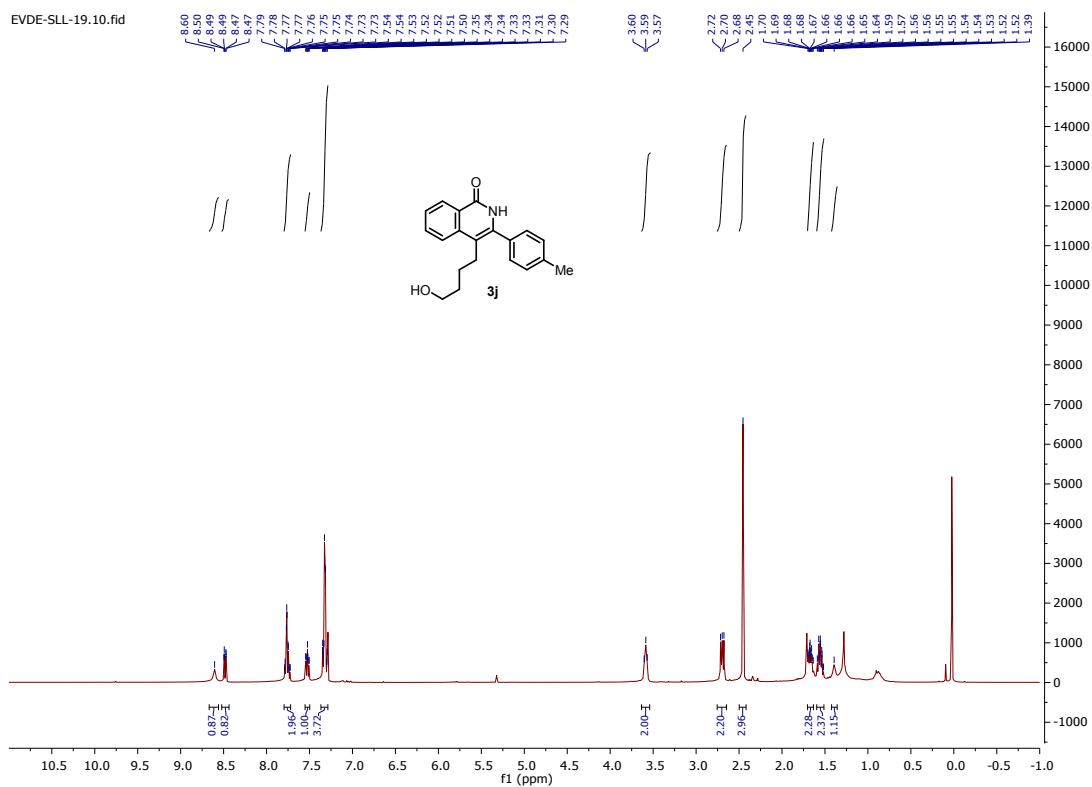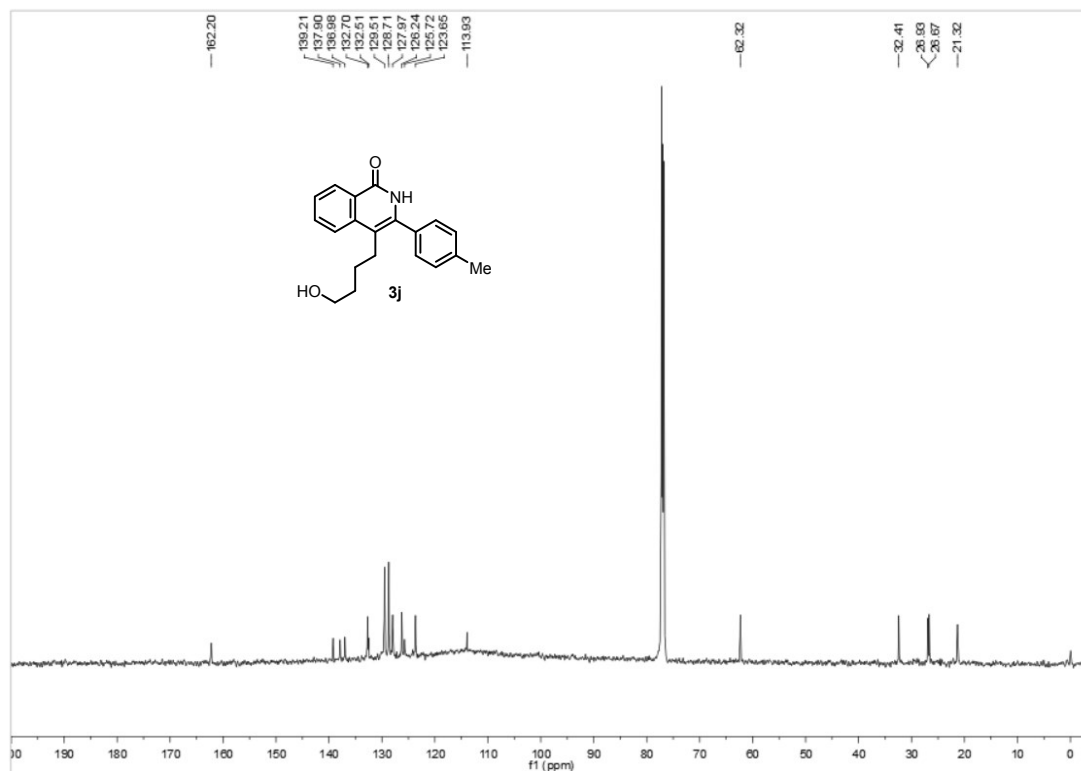

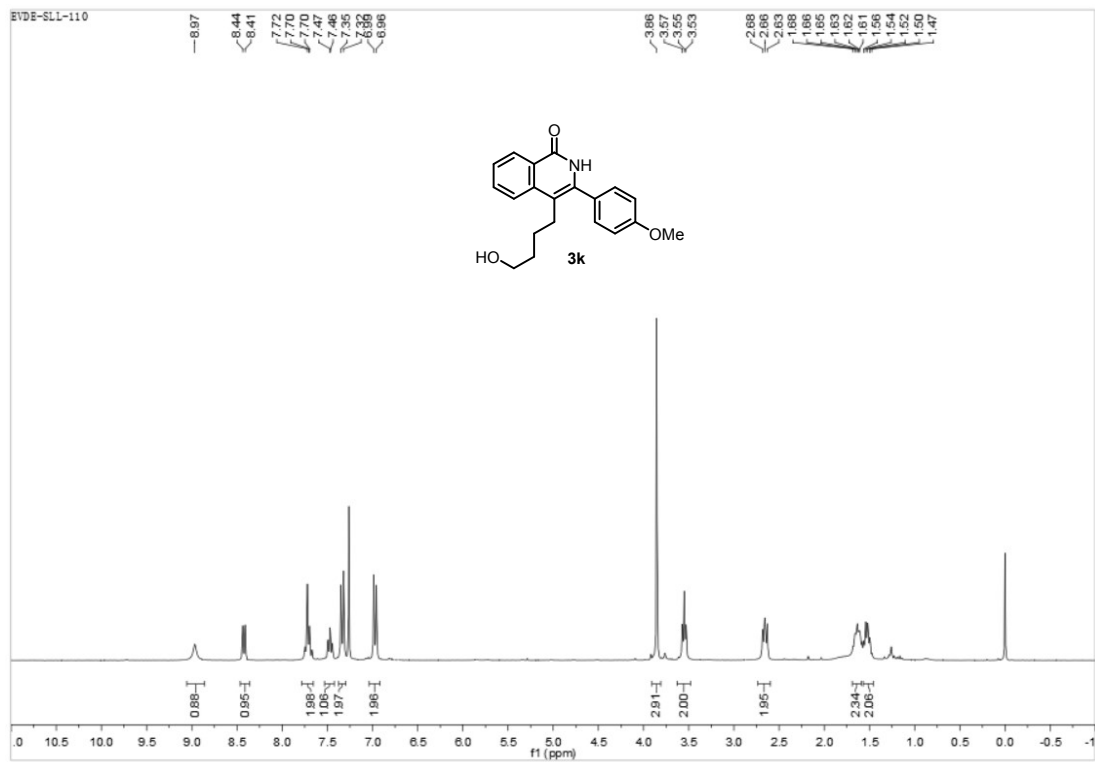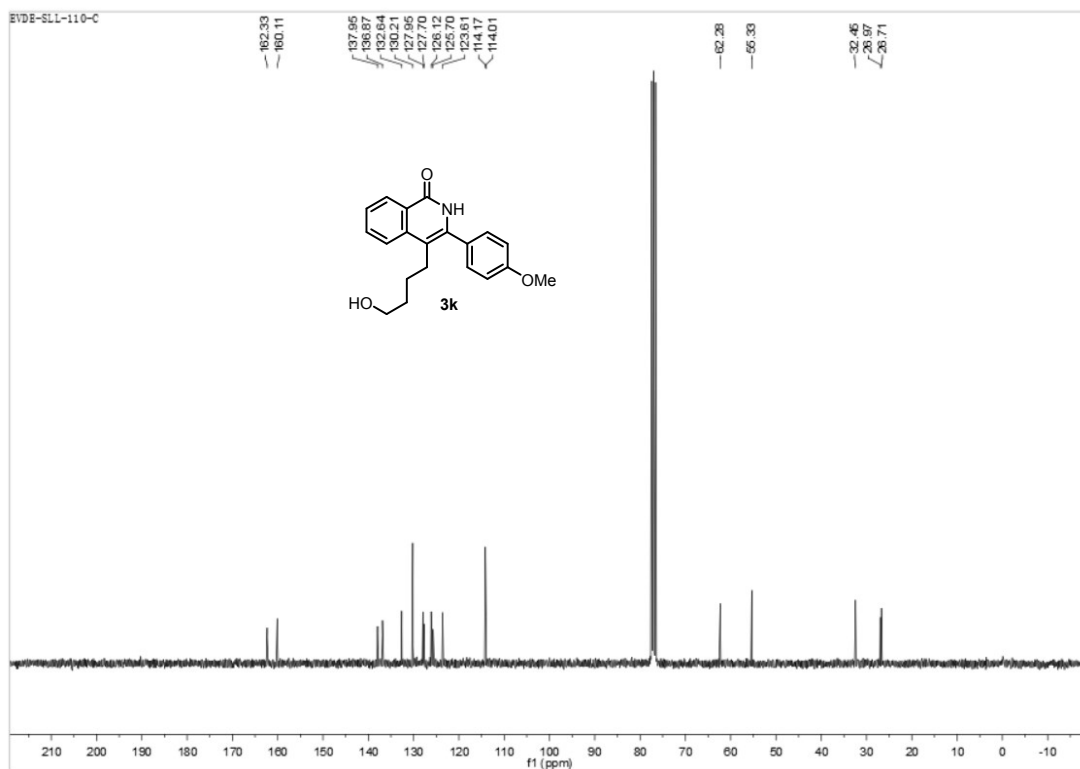

EVDE-SLL-20.10.fid

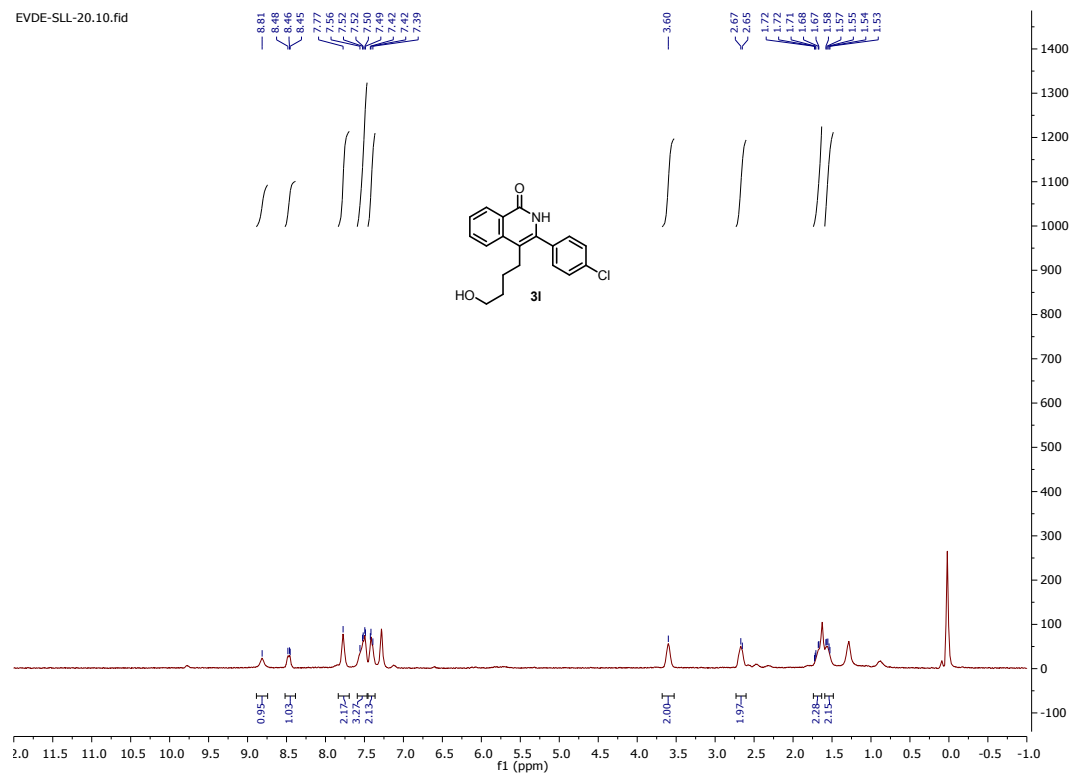

EVDE-SLL-20.20.fid

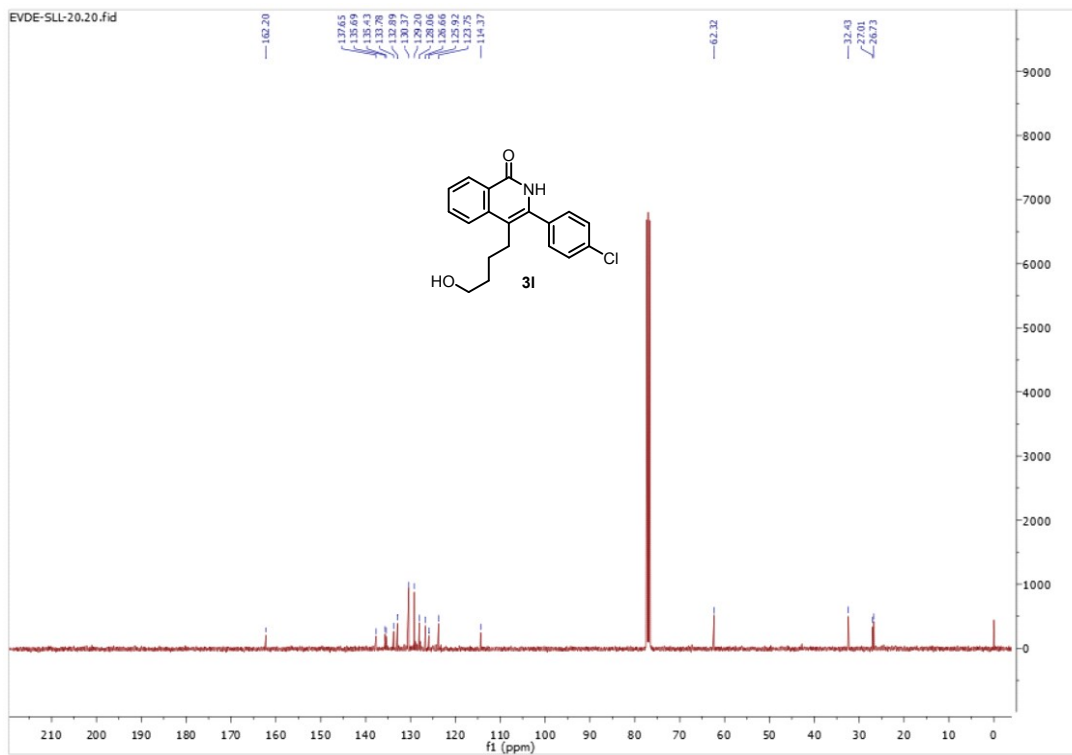

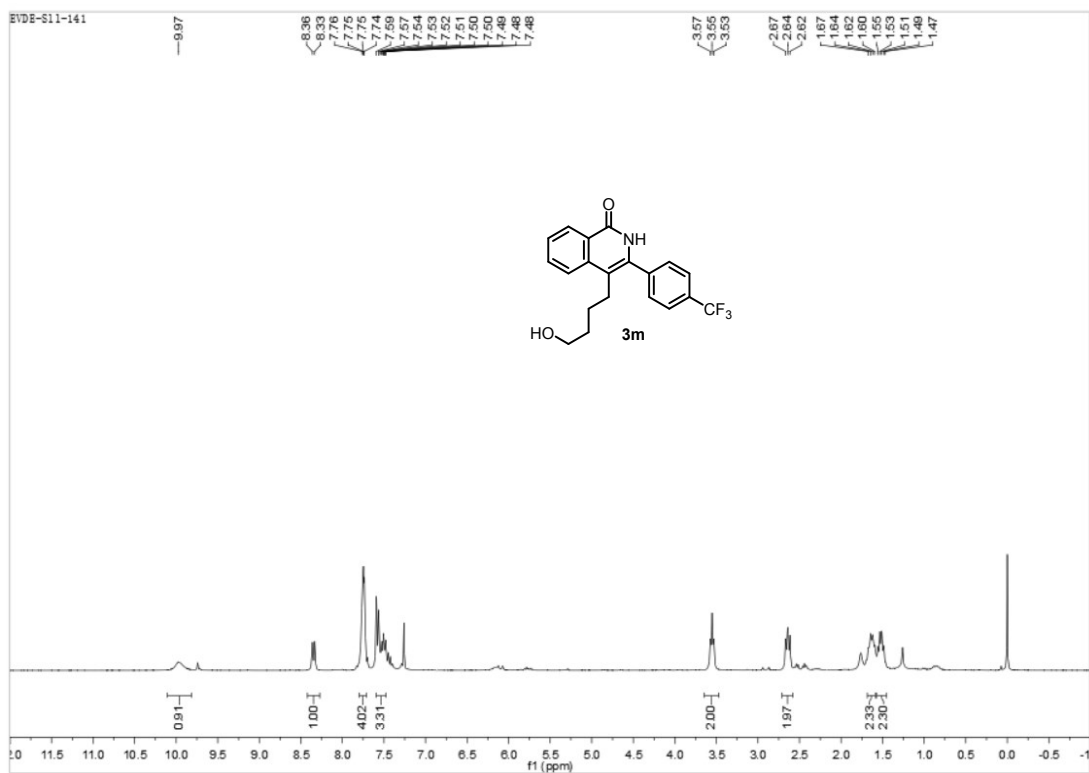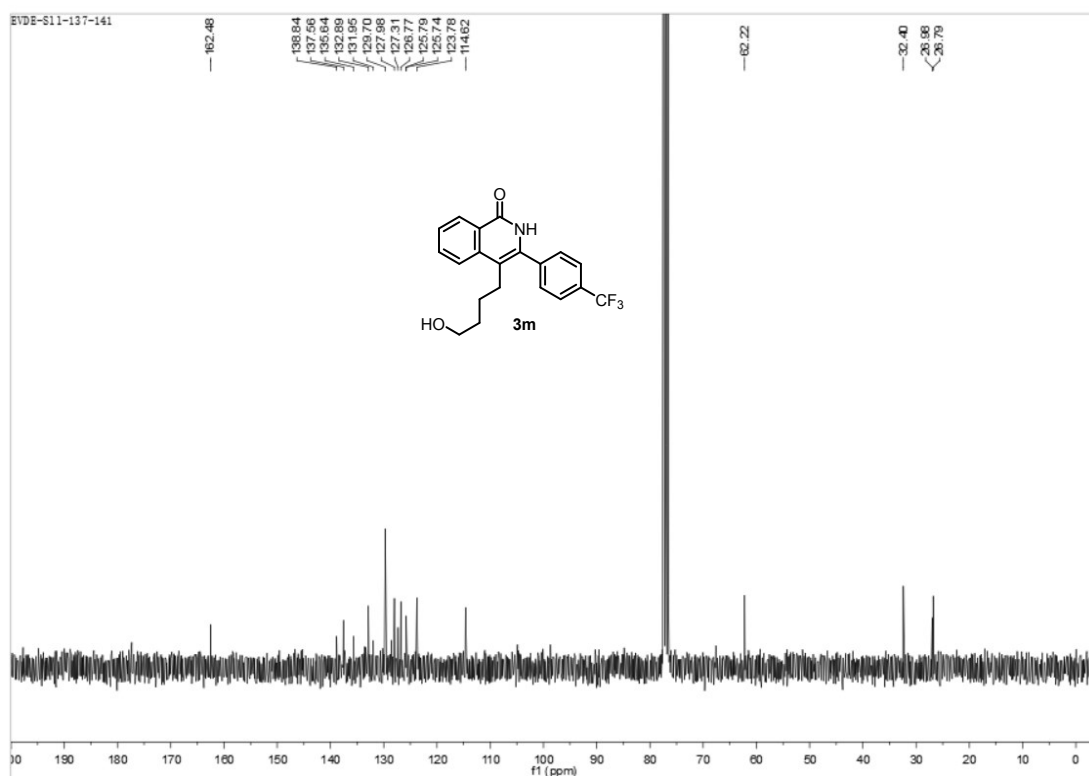

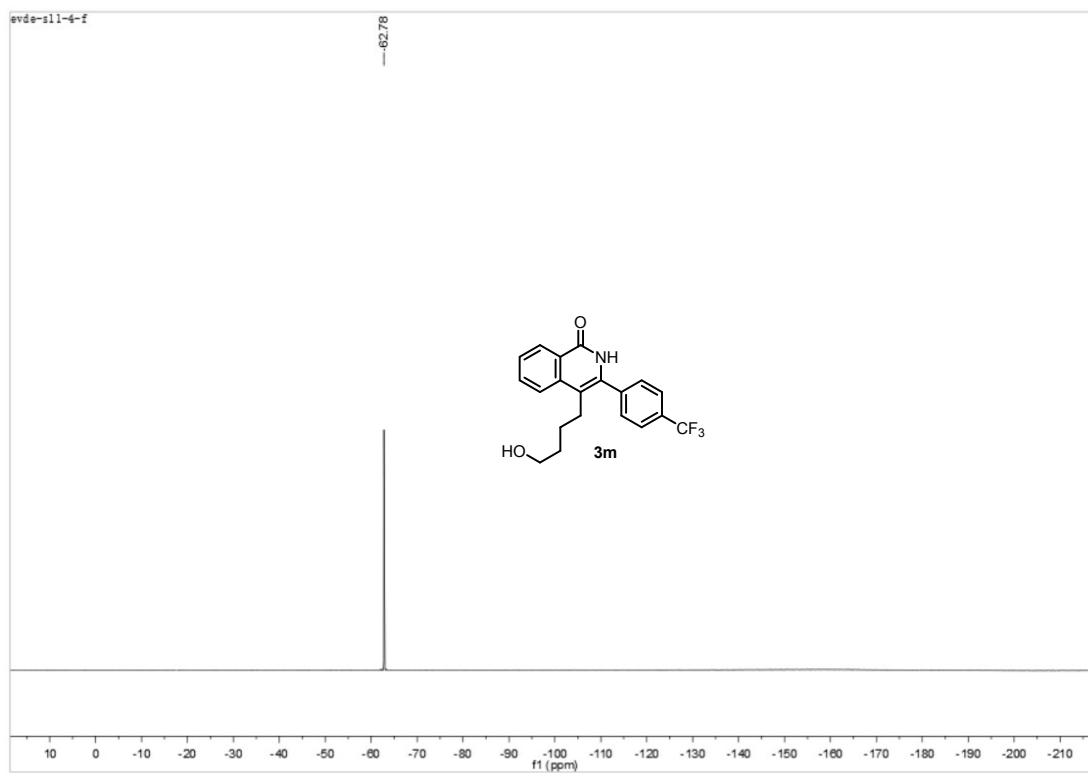

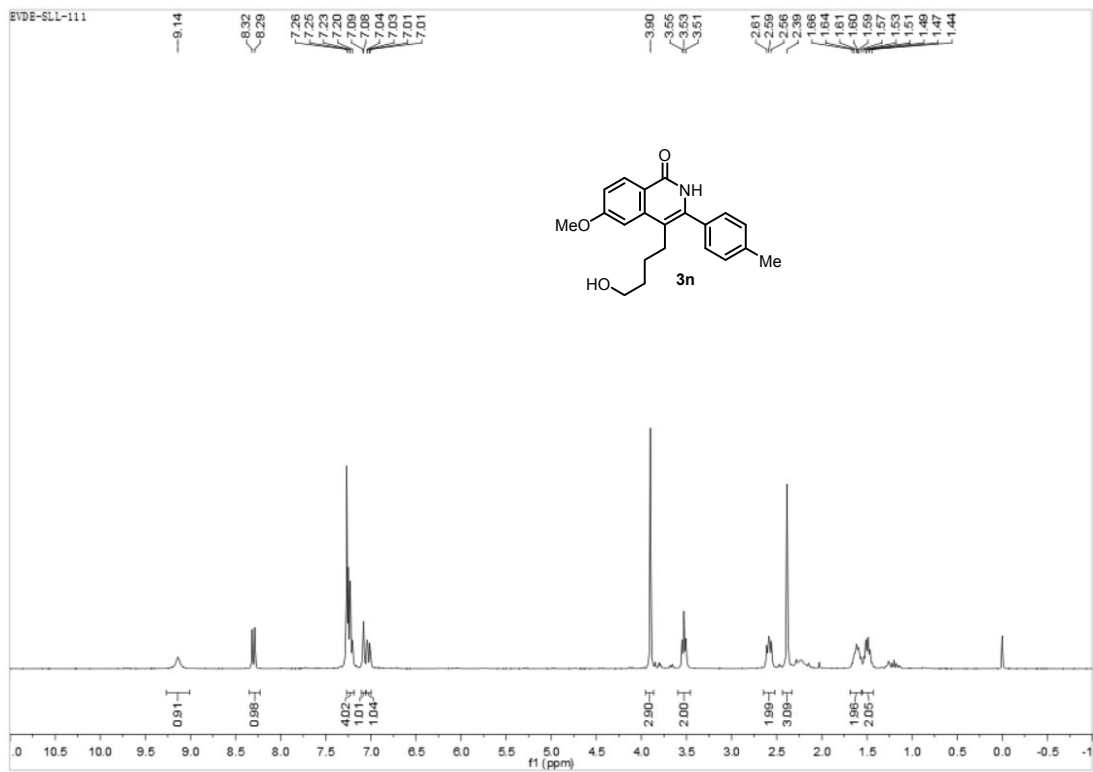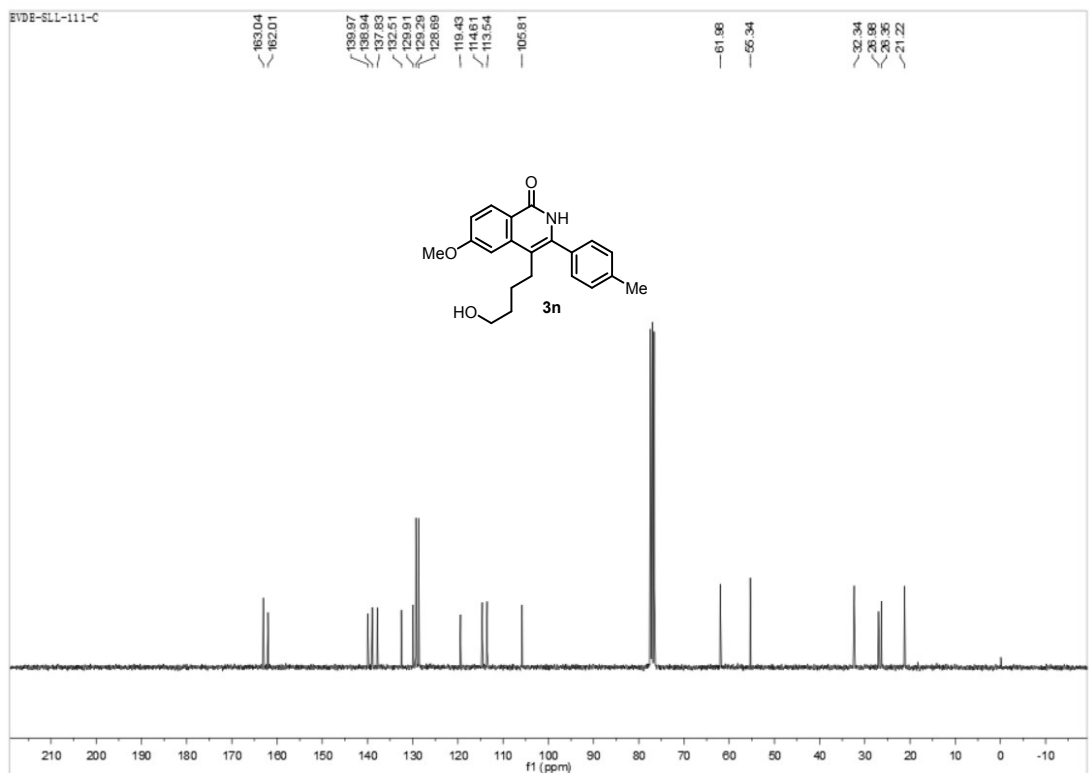

EVDE-SLL-22.10.fid

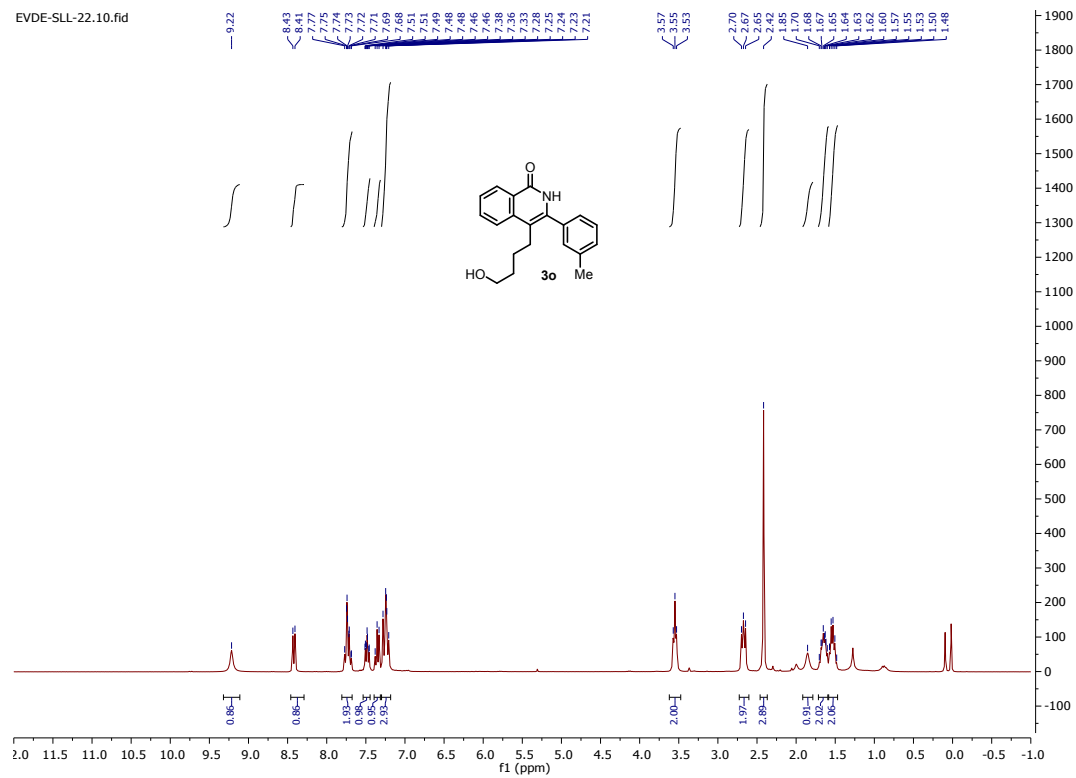

EVDE-SLL-57-C

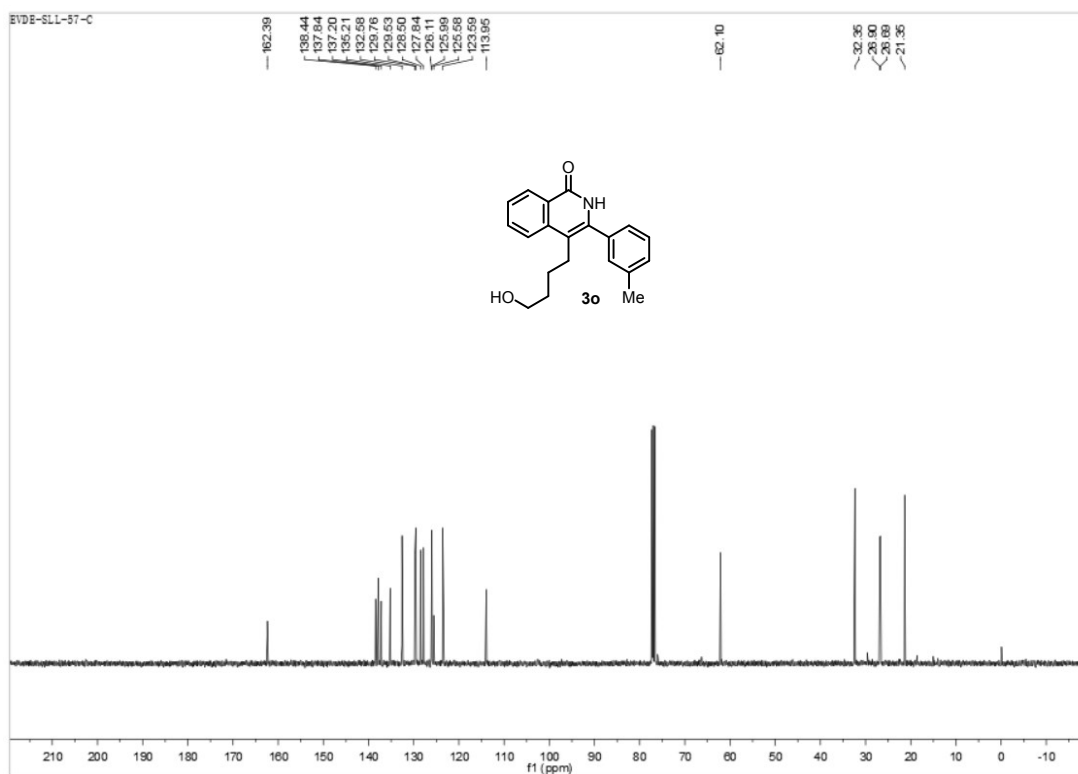



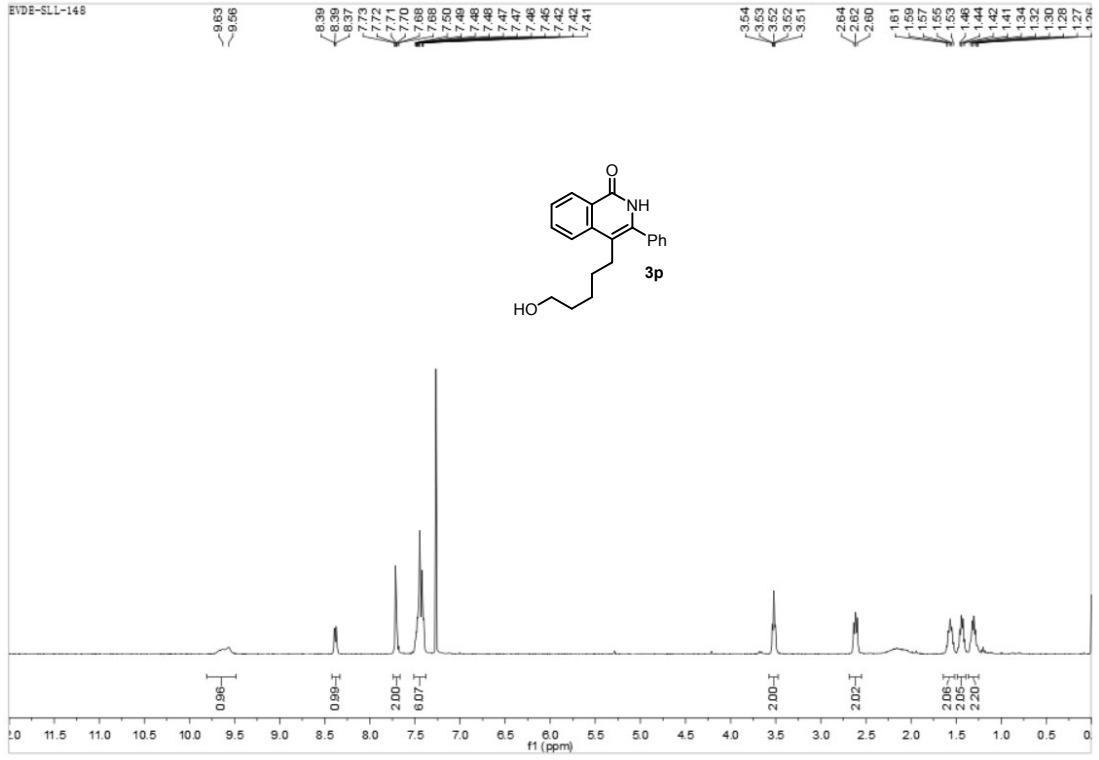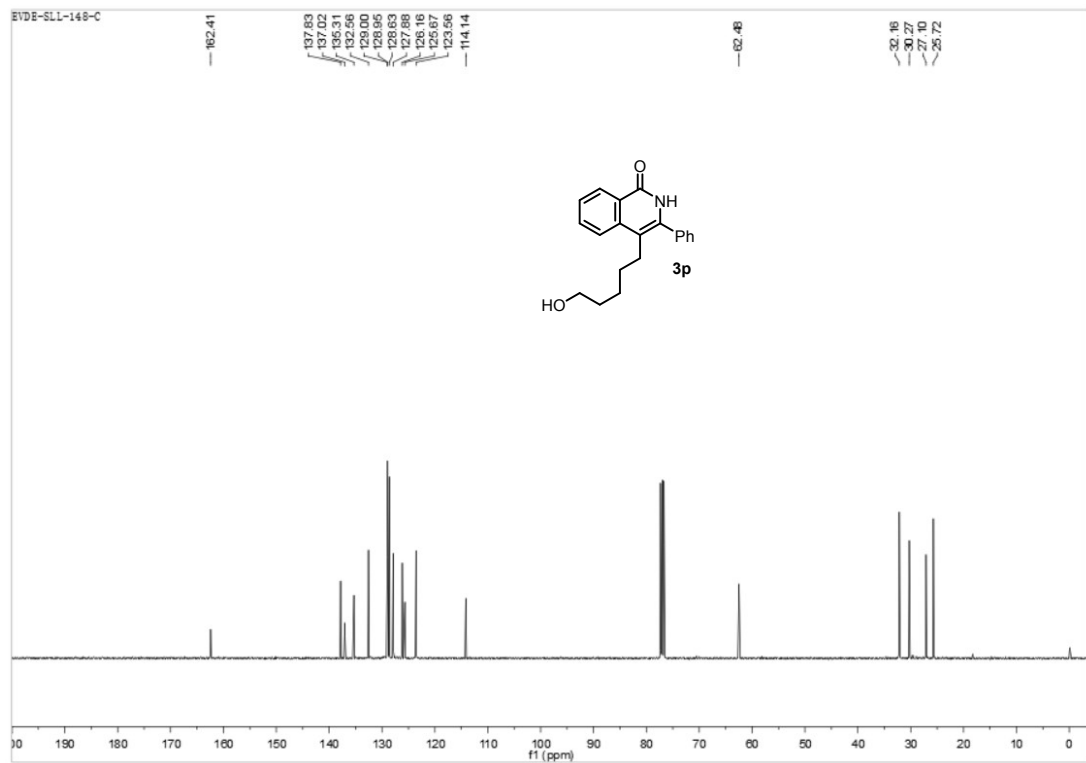

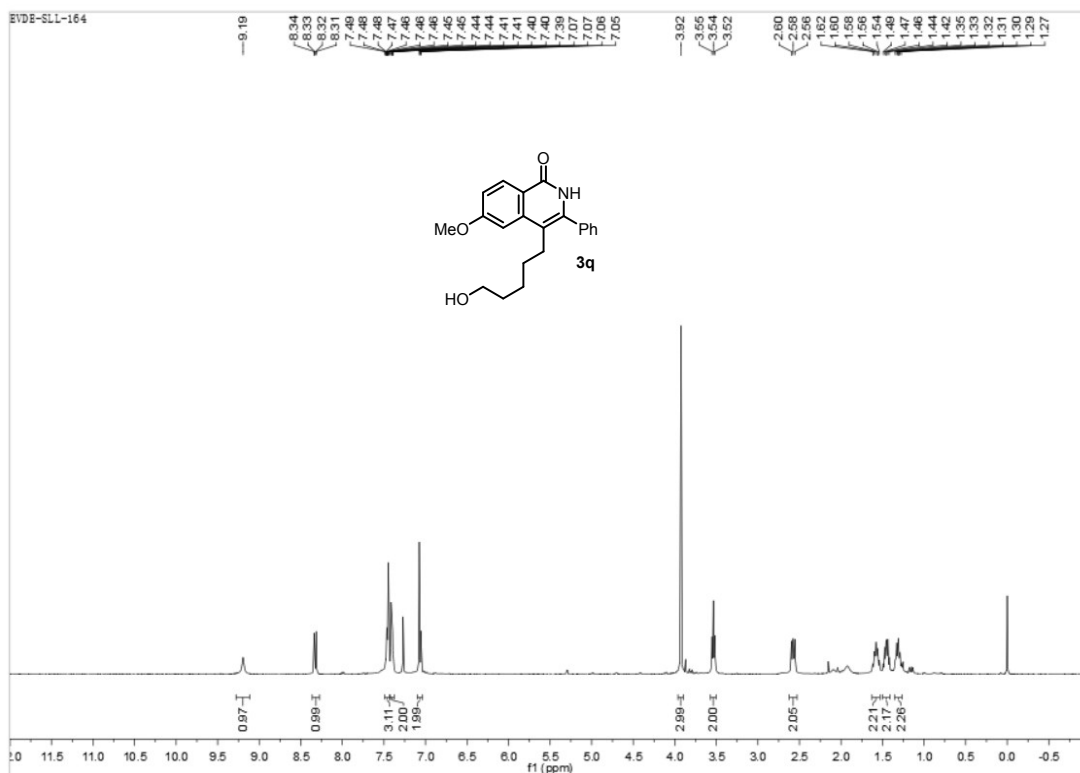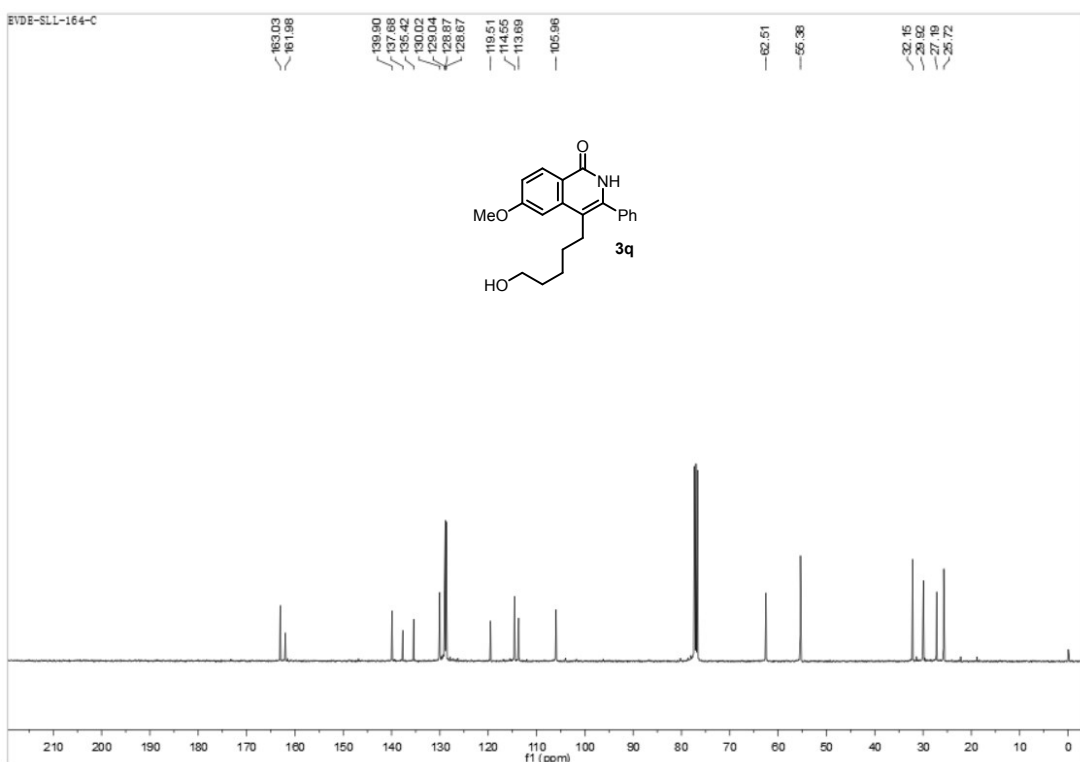

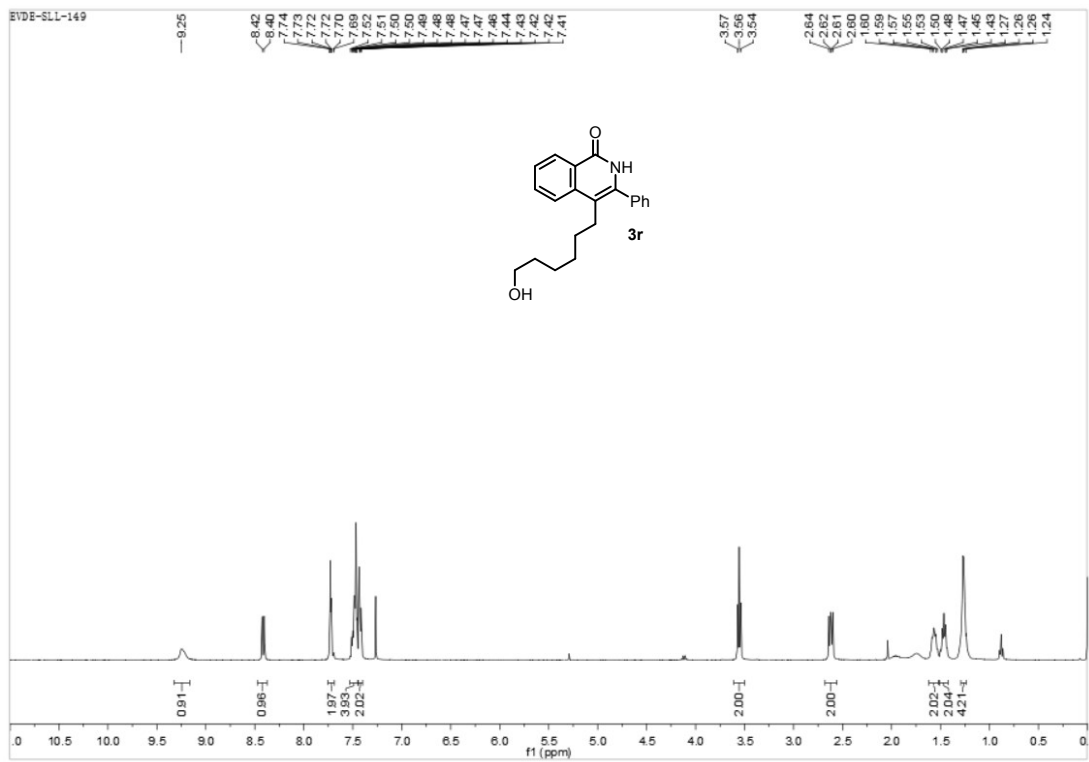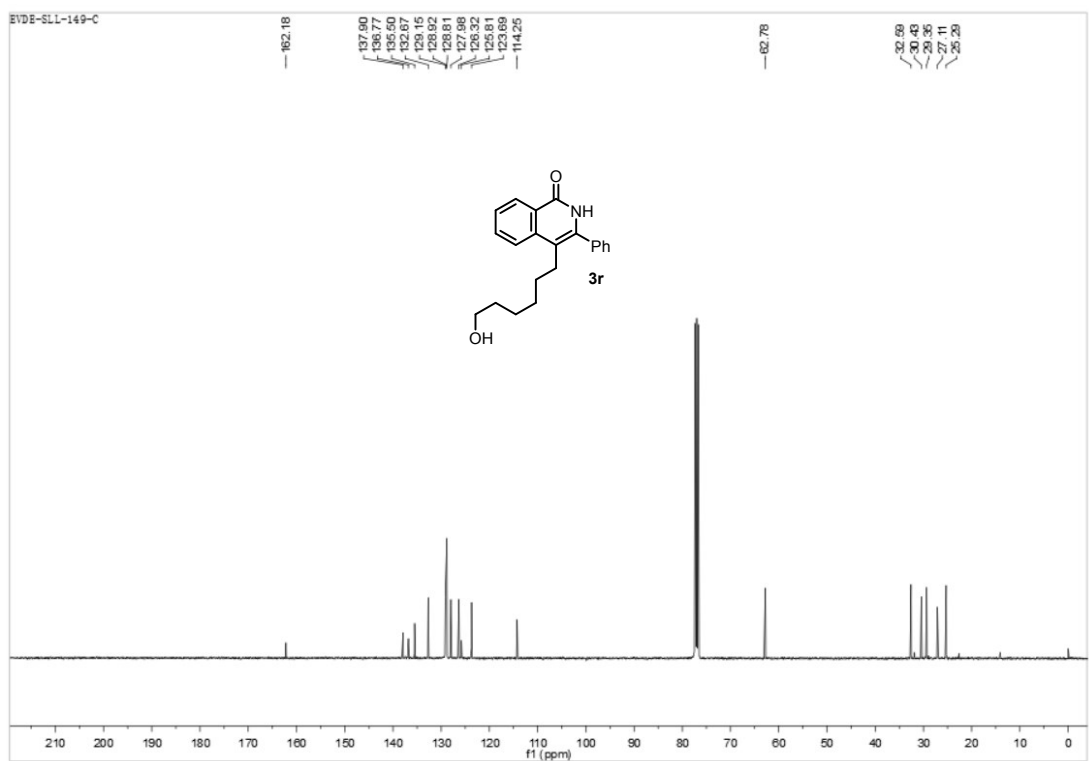

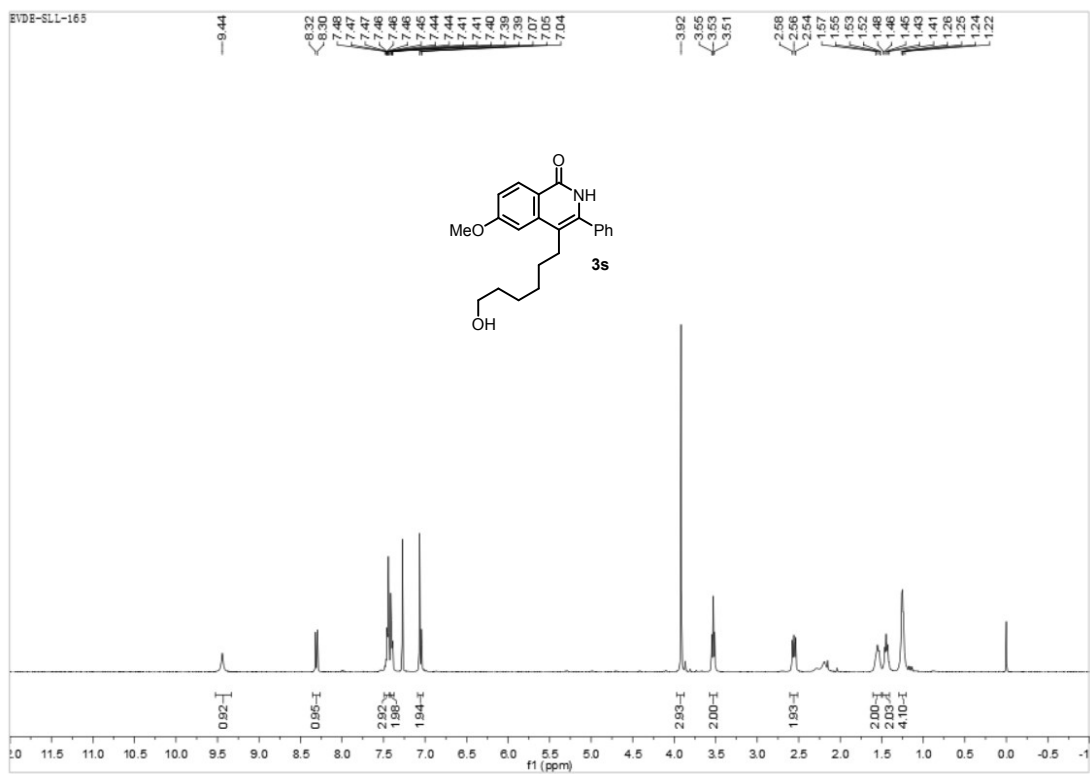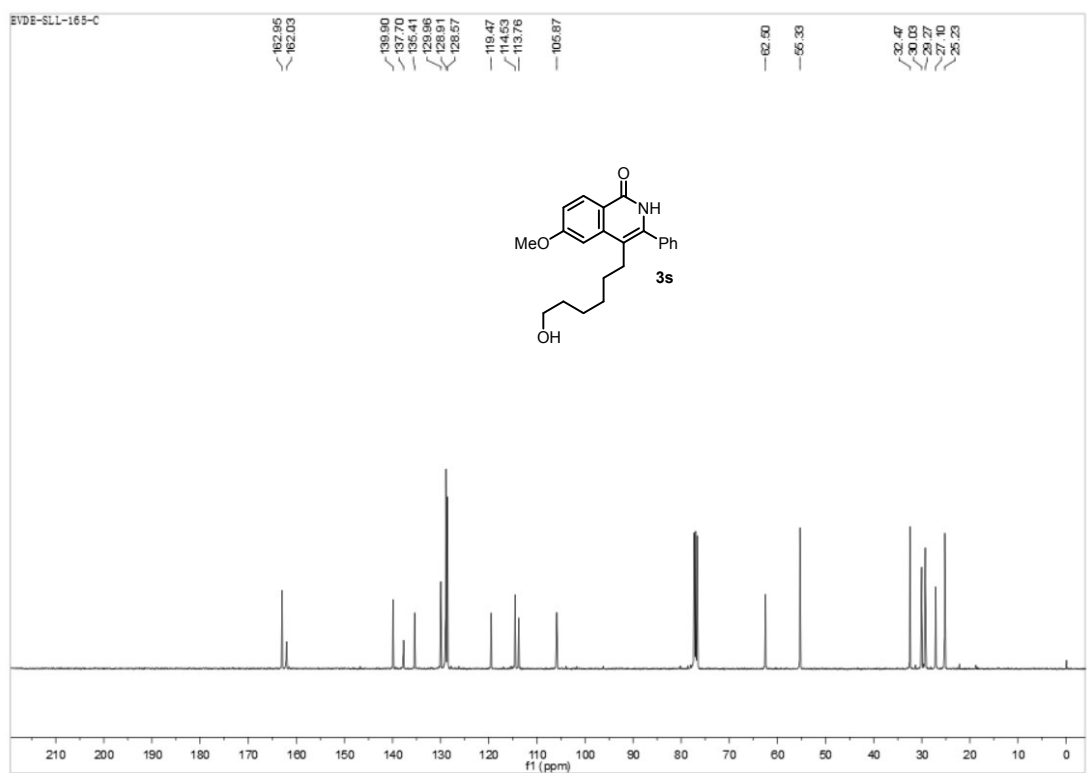

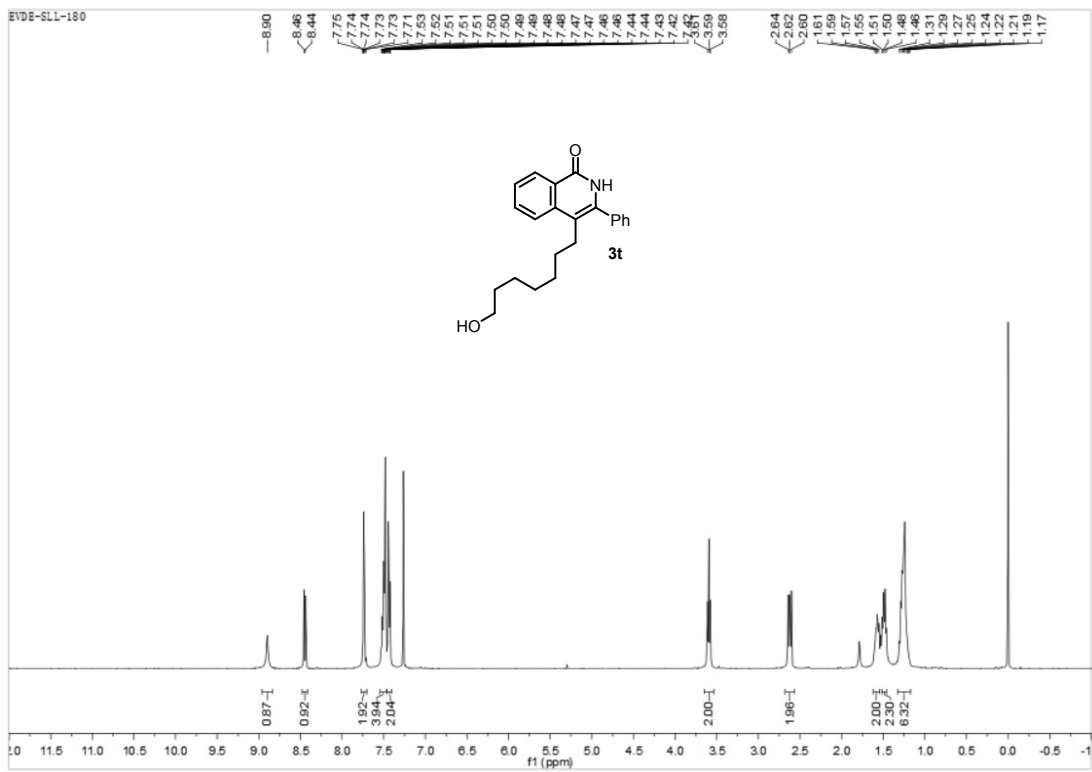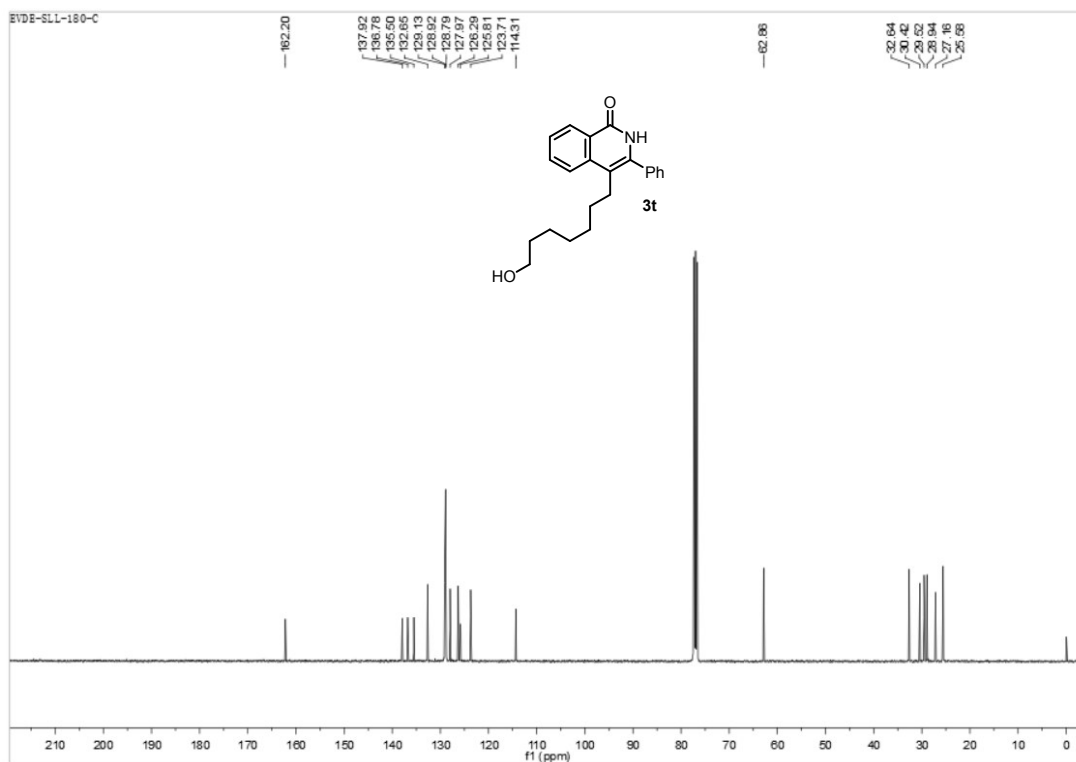

EVDE-SLL-23.10.fid

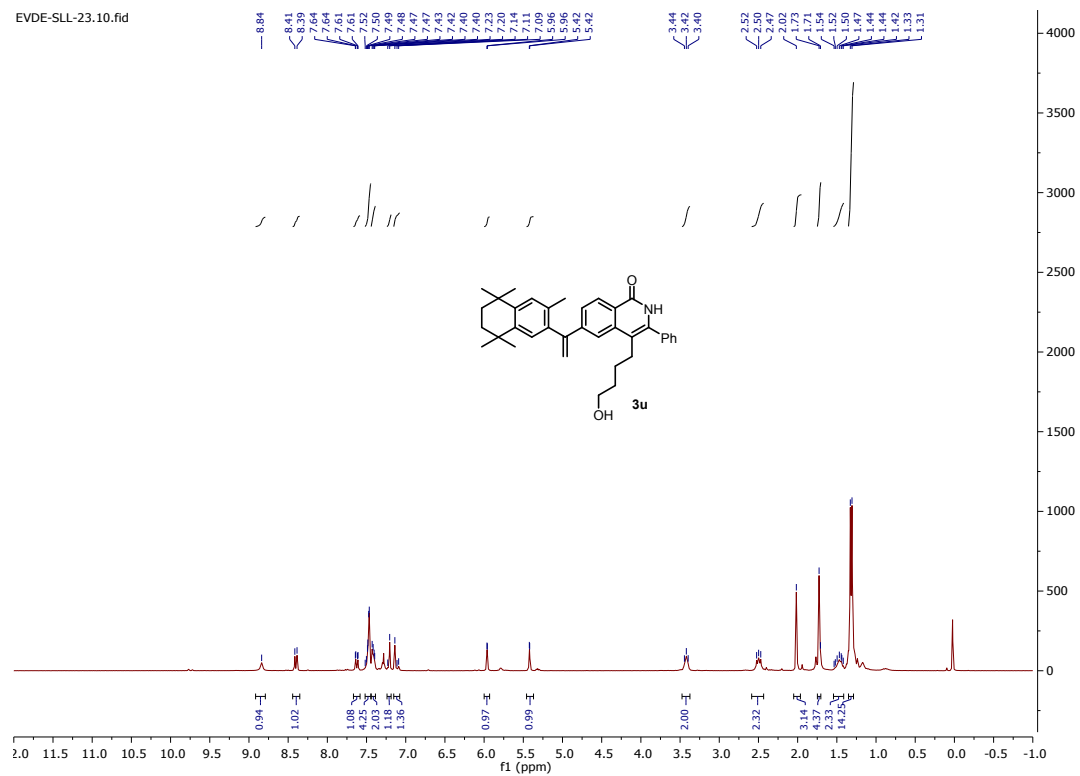

EVDE-SLL-23.10.fid

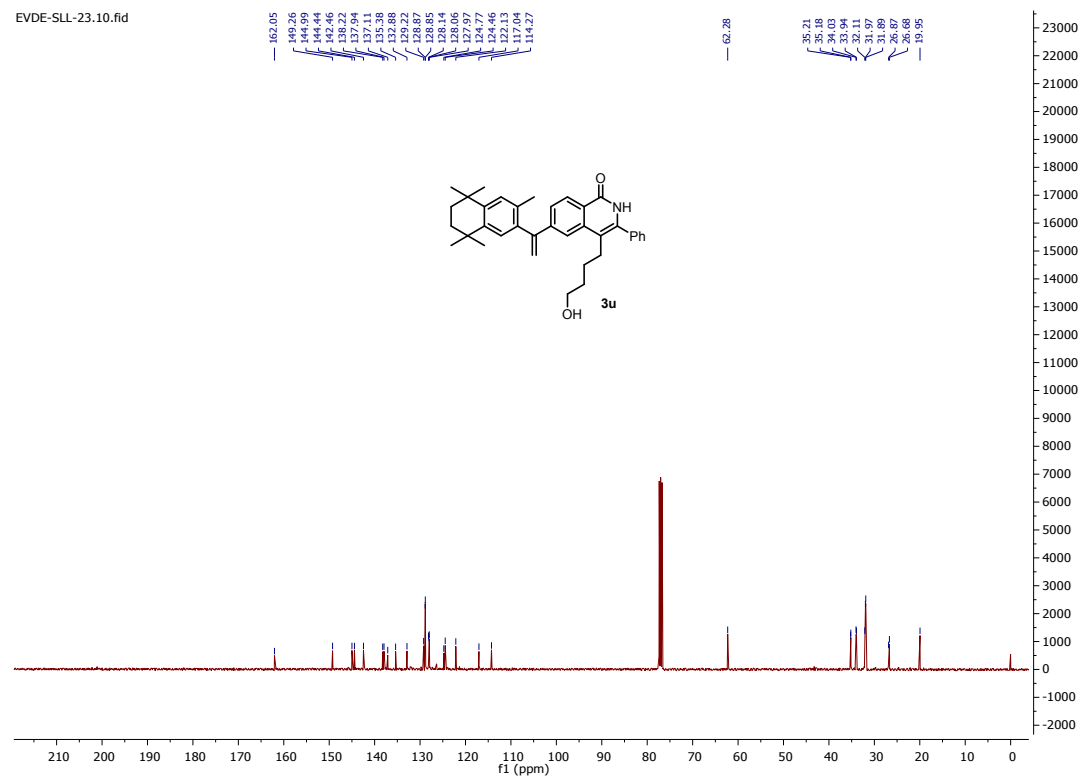

EVDE-SLL-24.10.fid

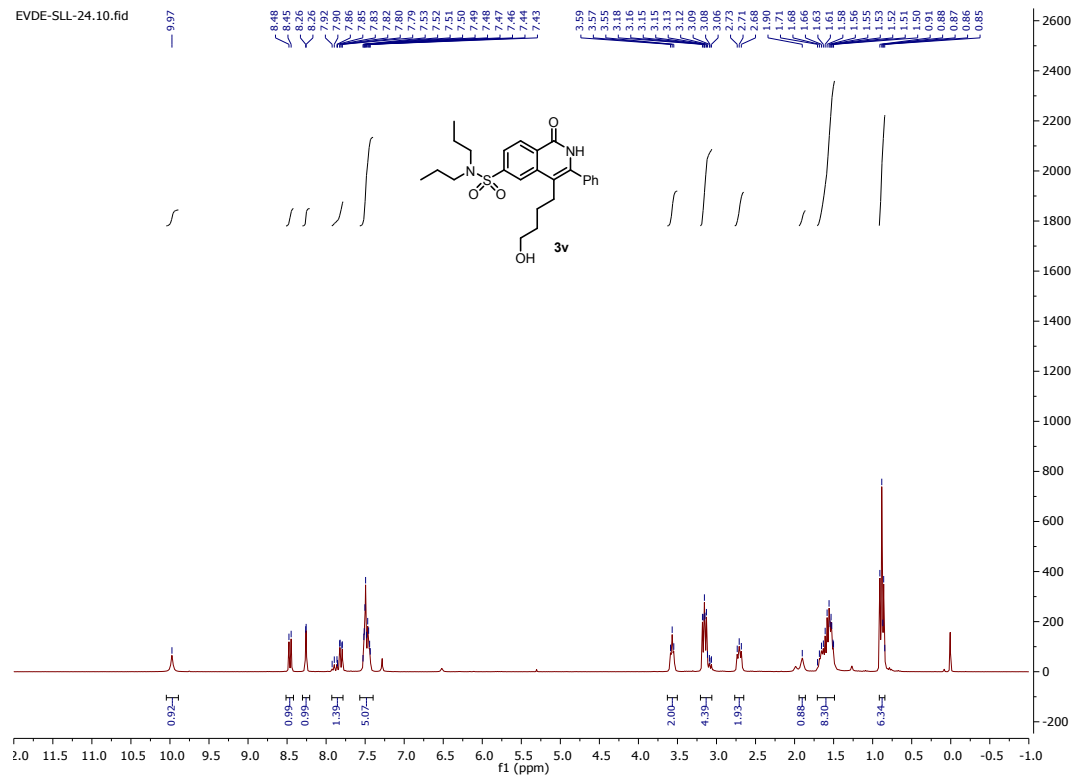

EVDE-SLL-24.10.fid

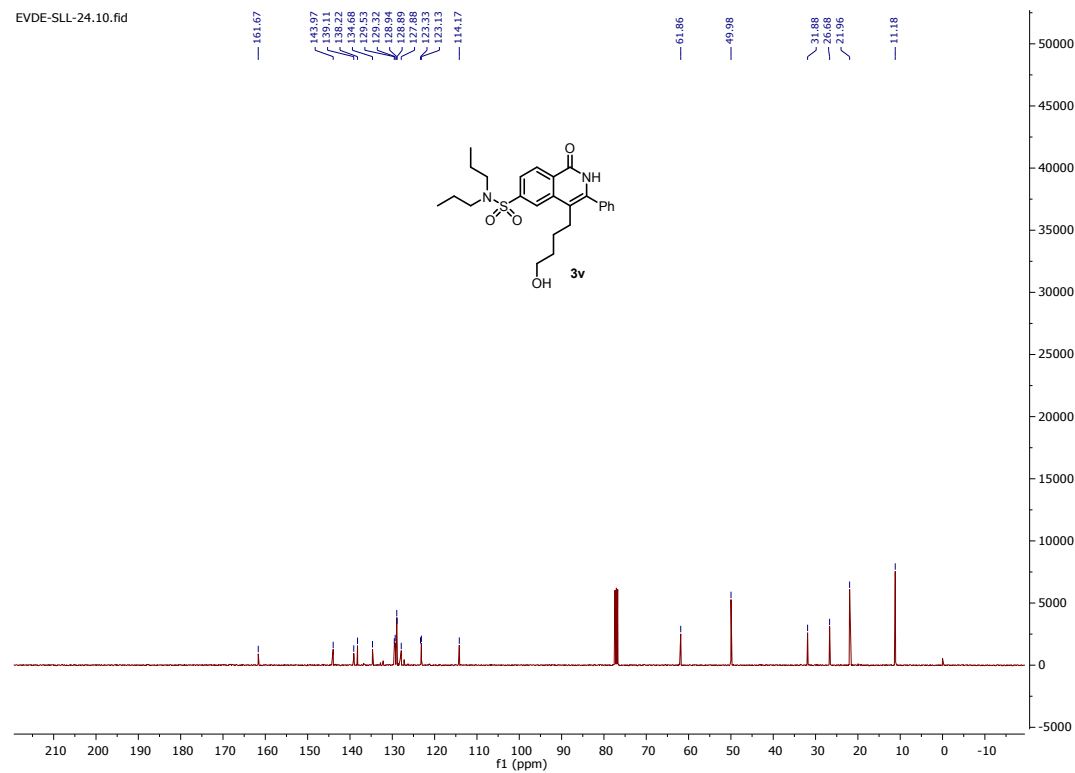

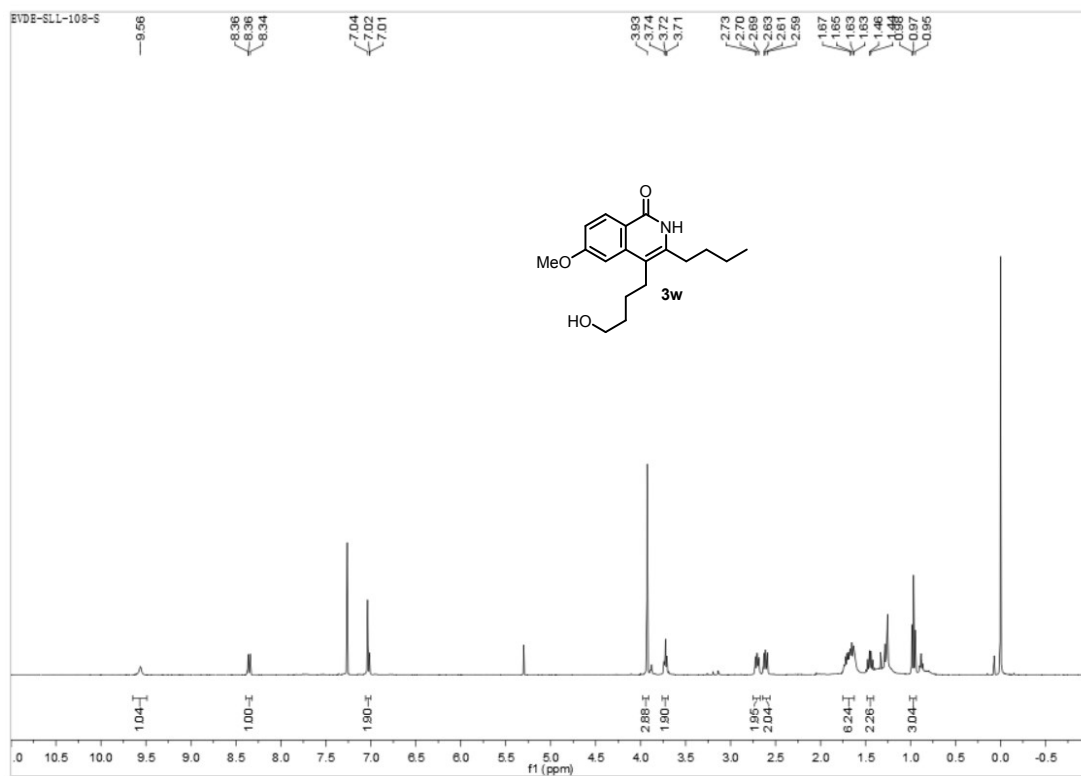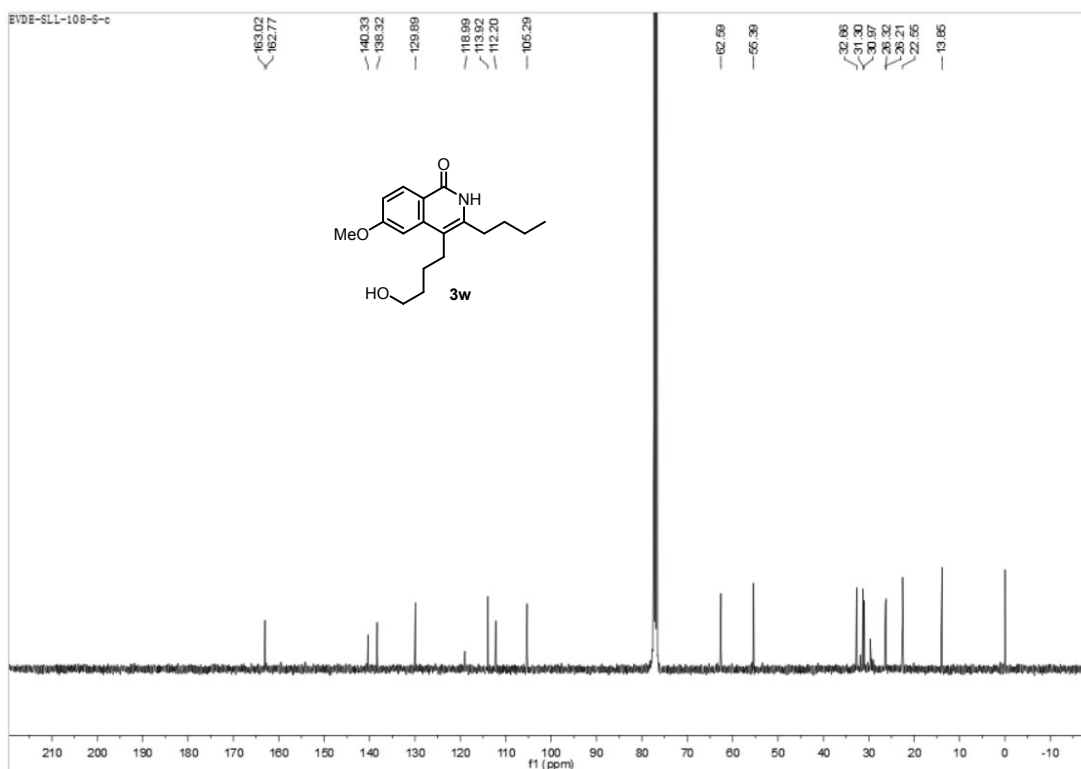



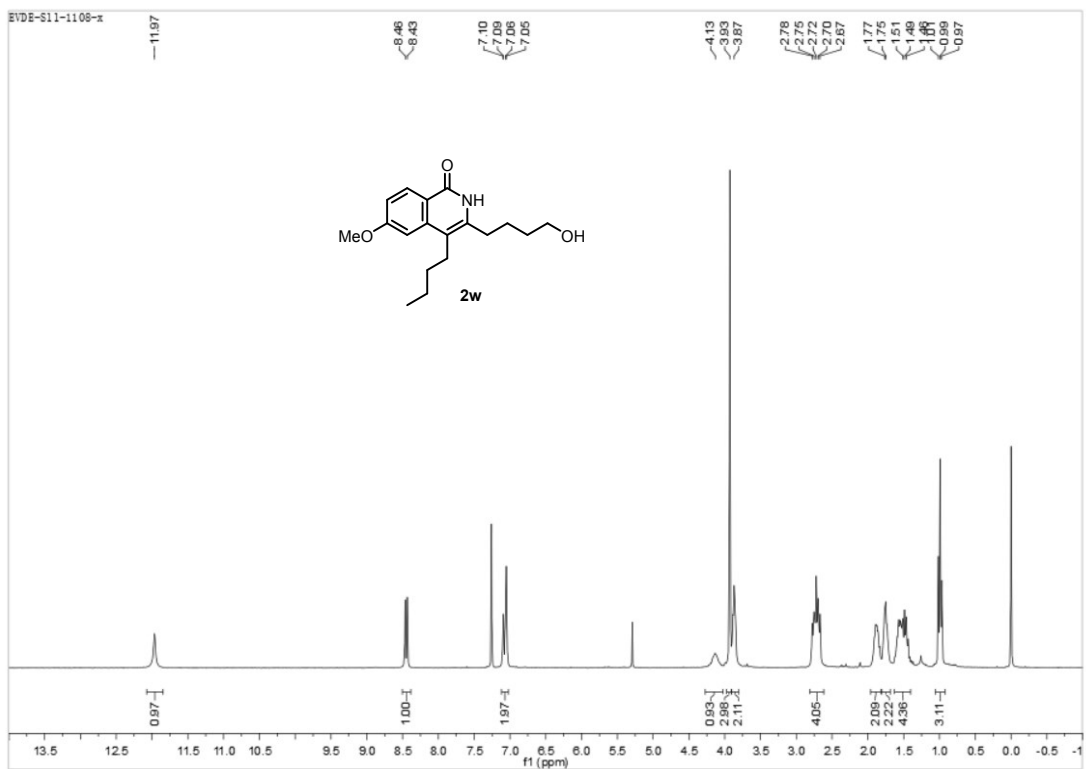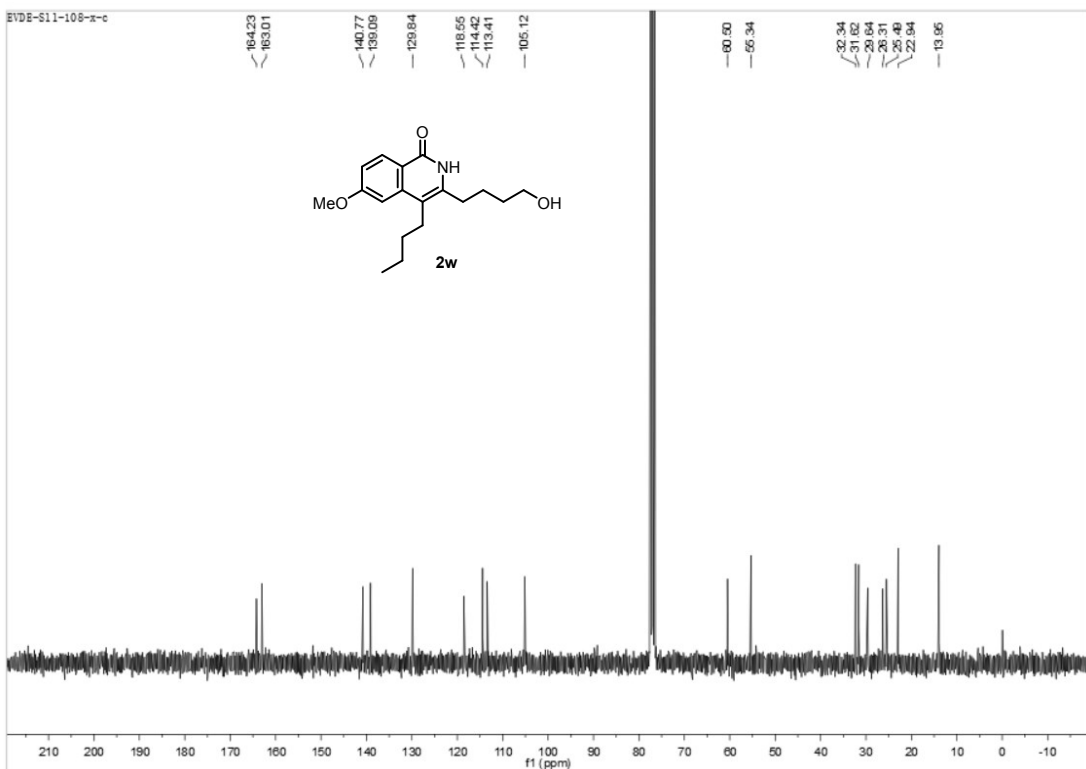

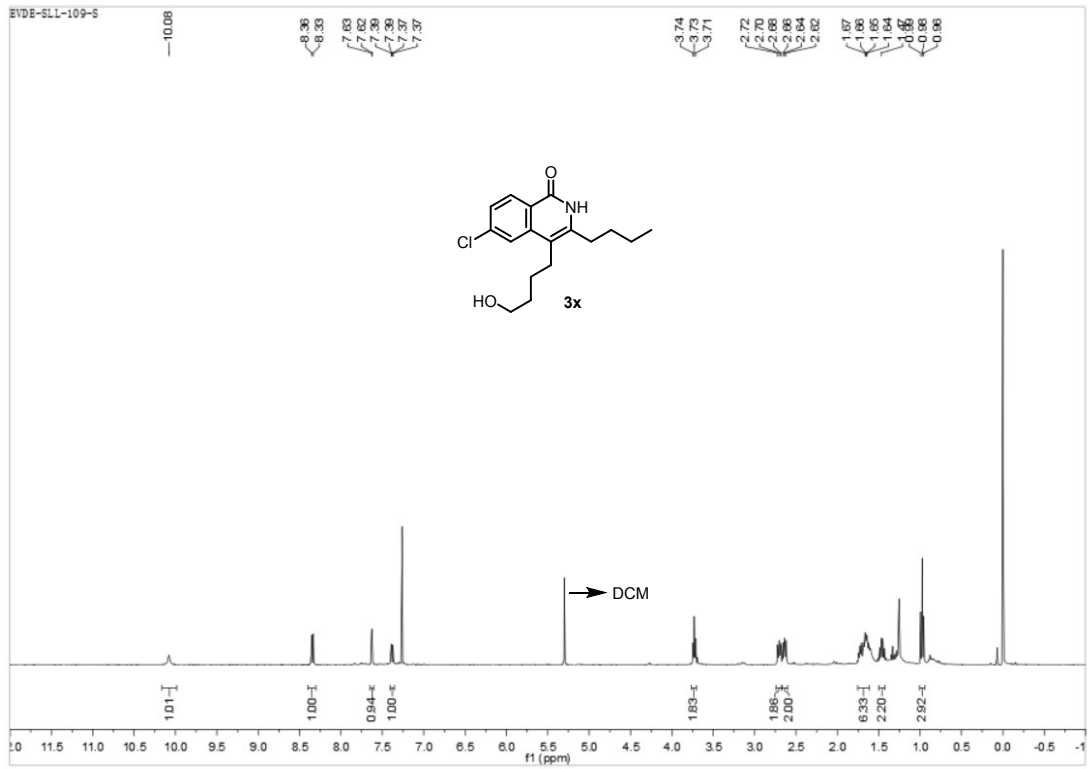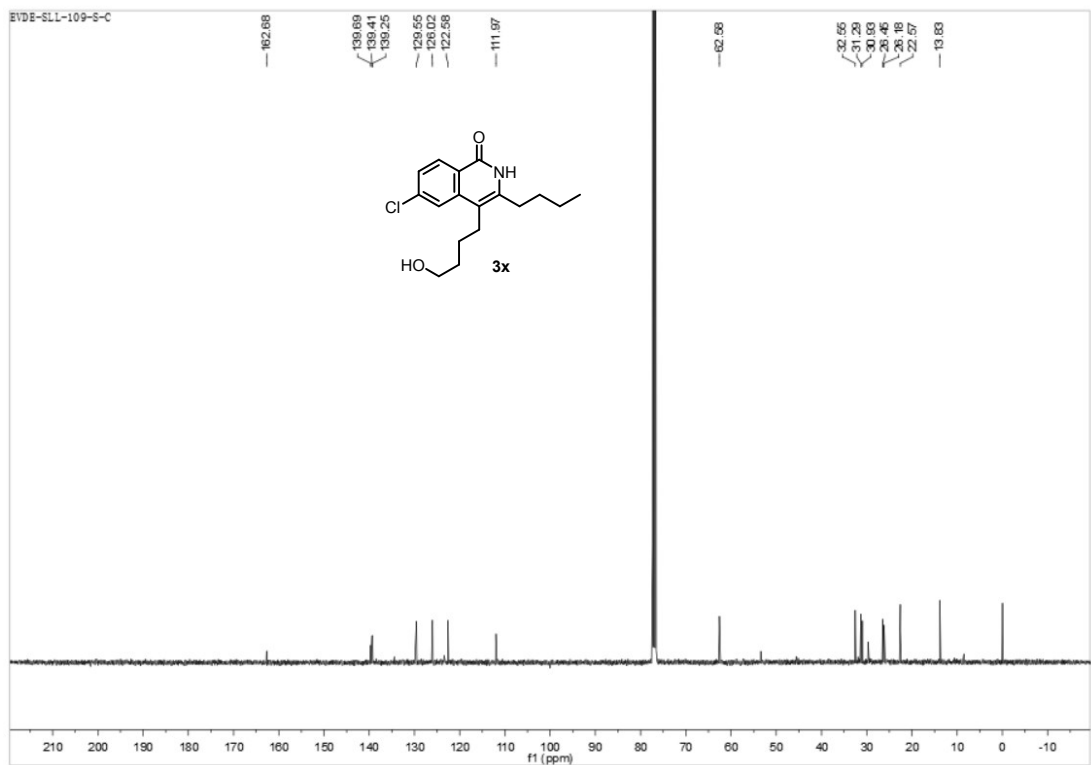

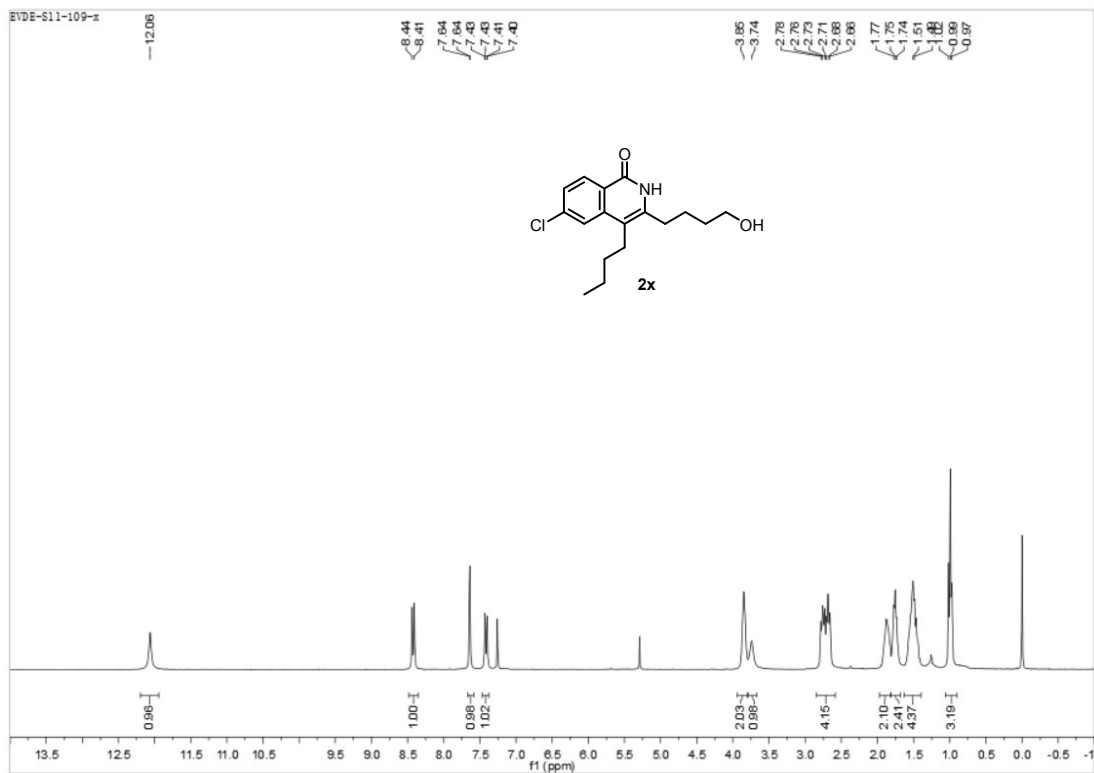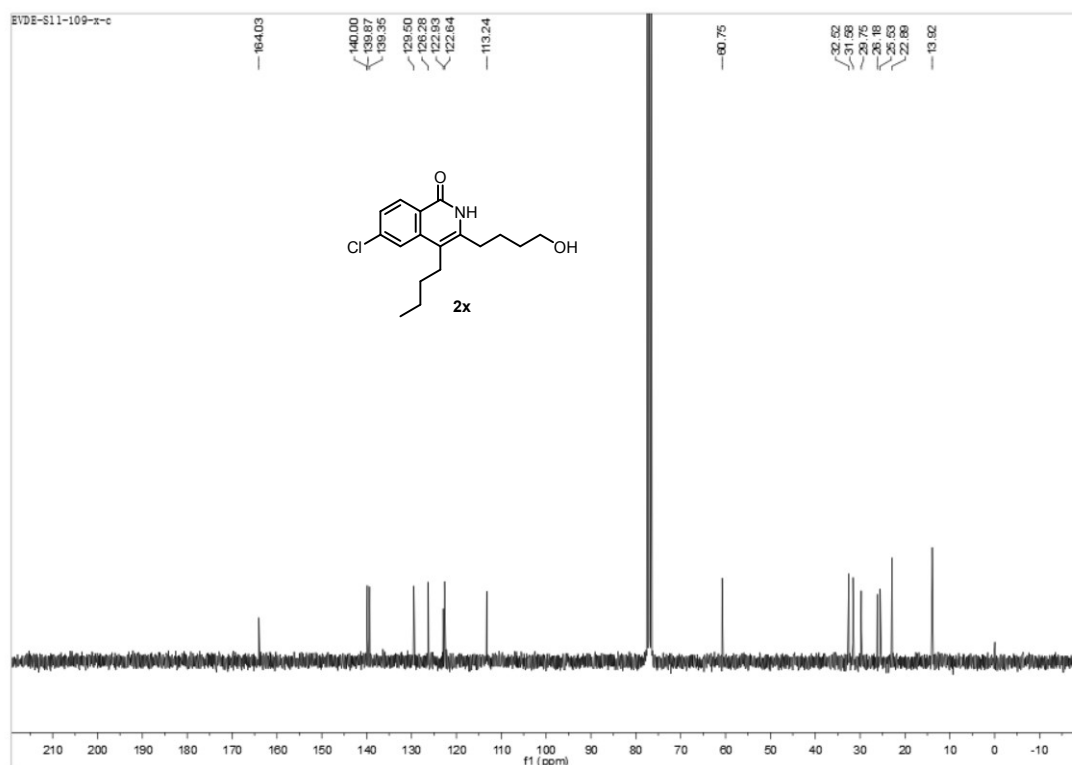

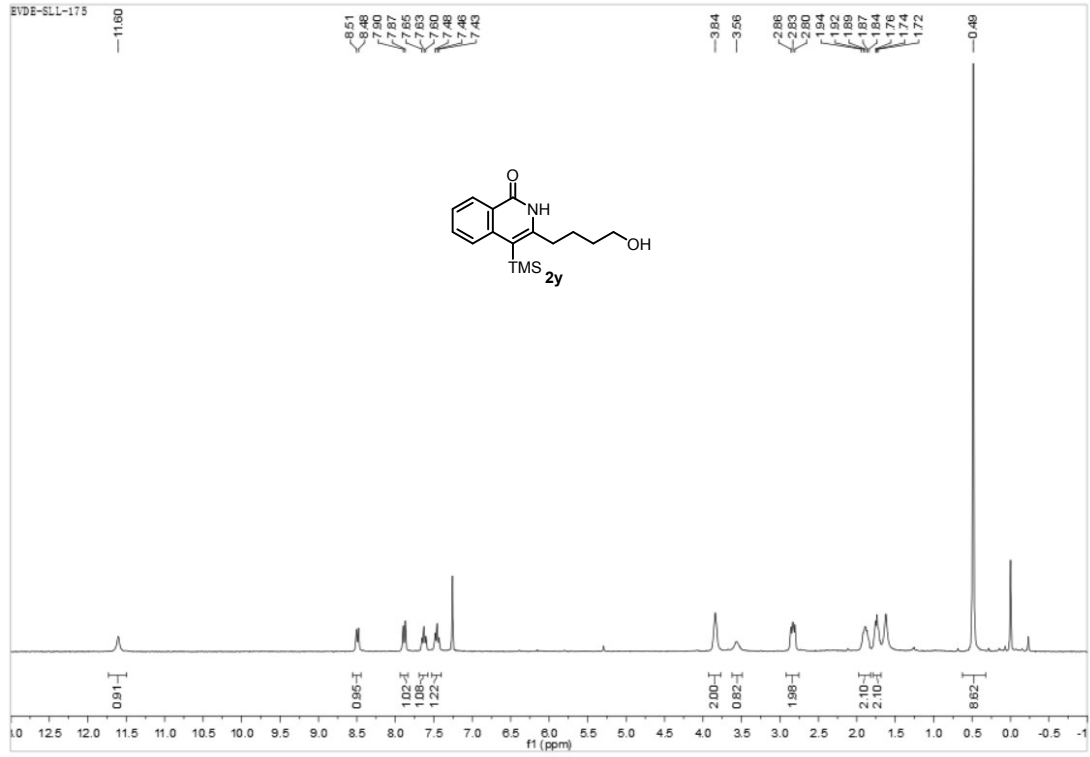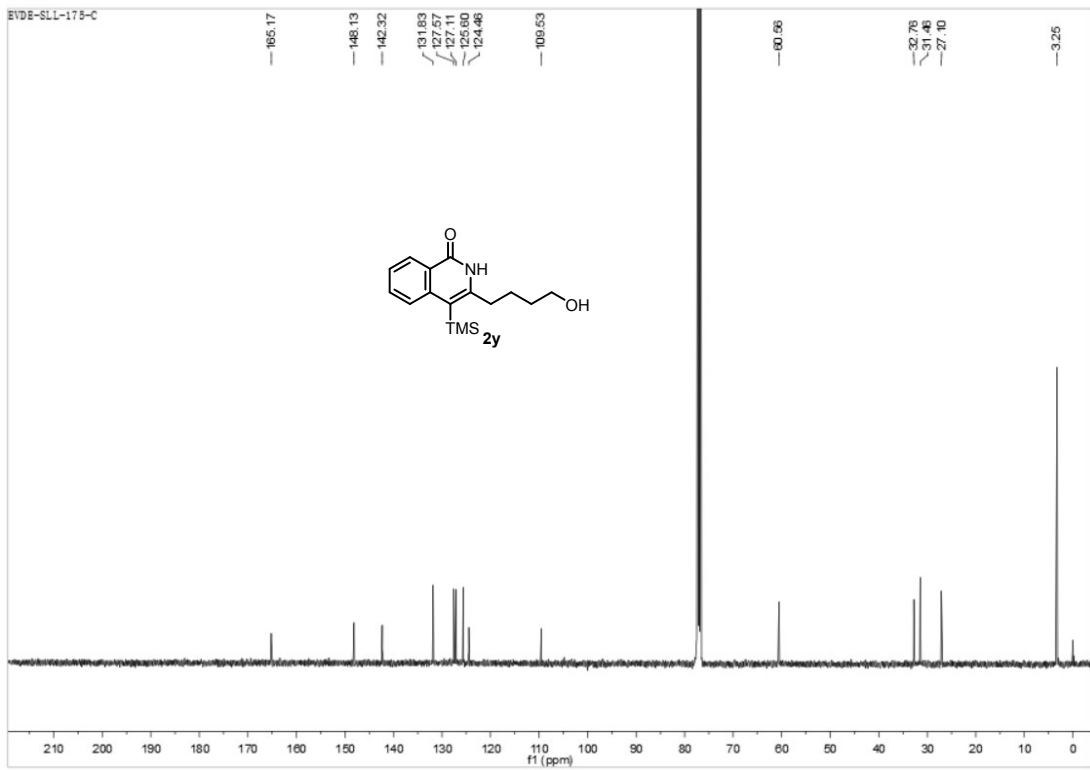

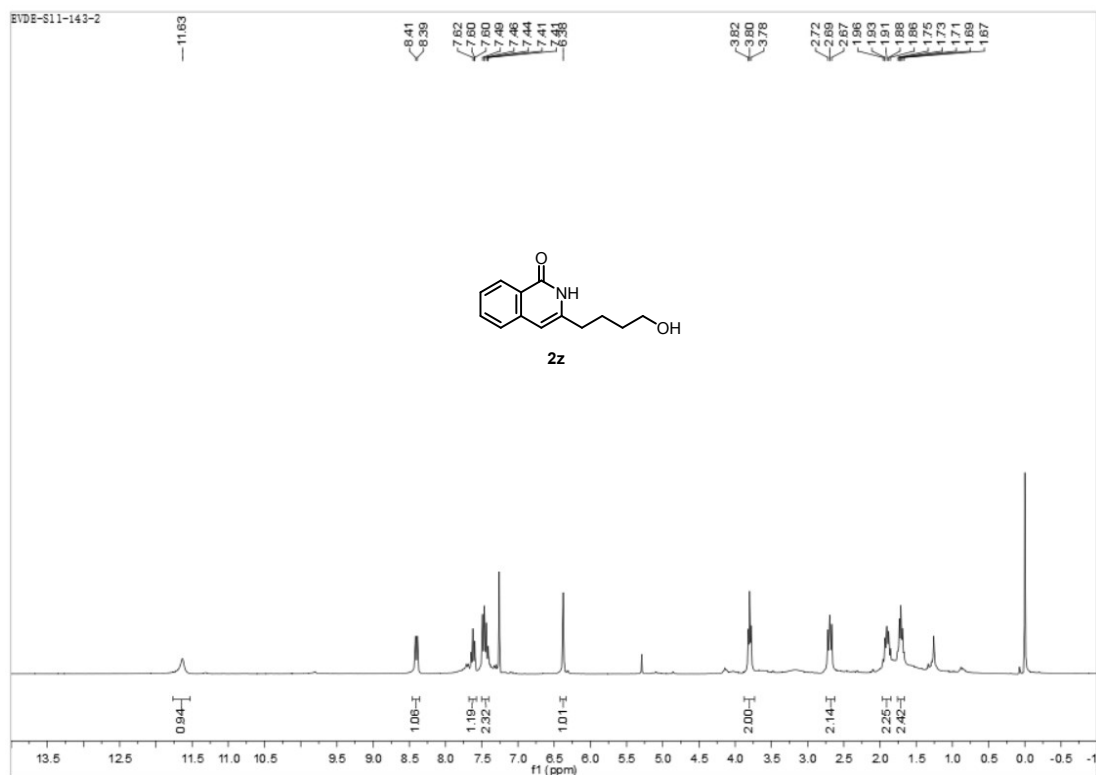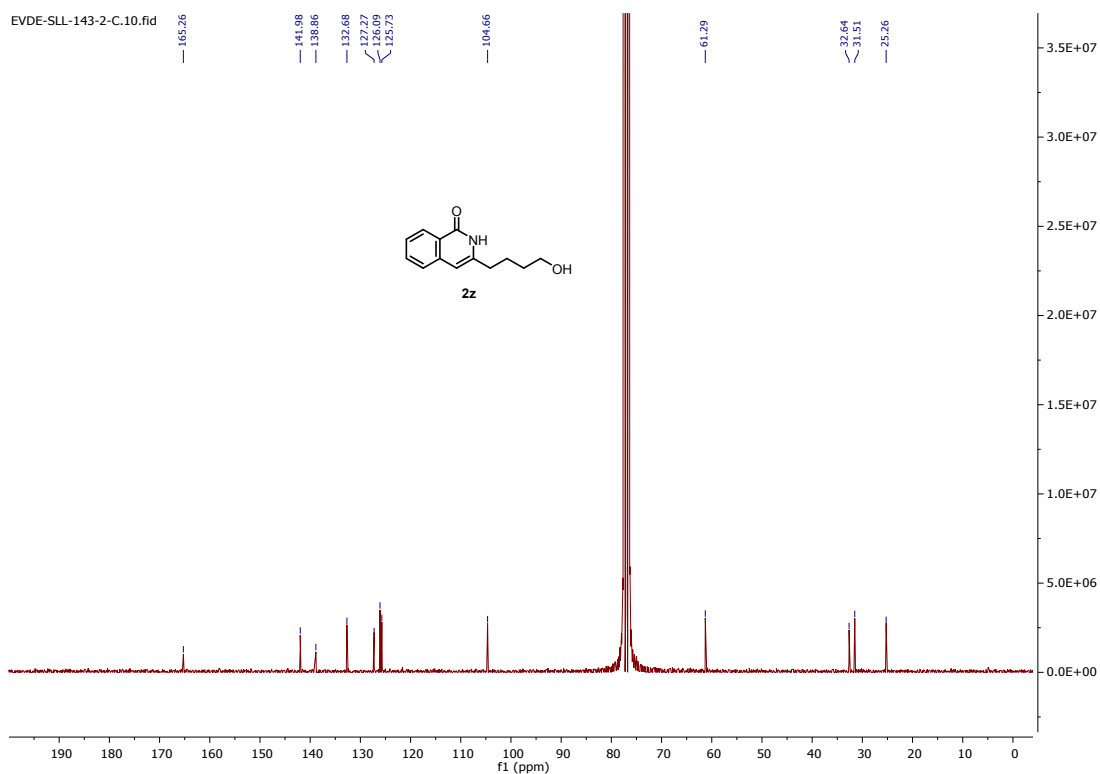

EVDE-SLL-27.10.fid

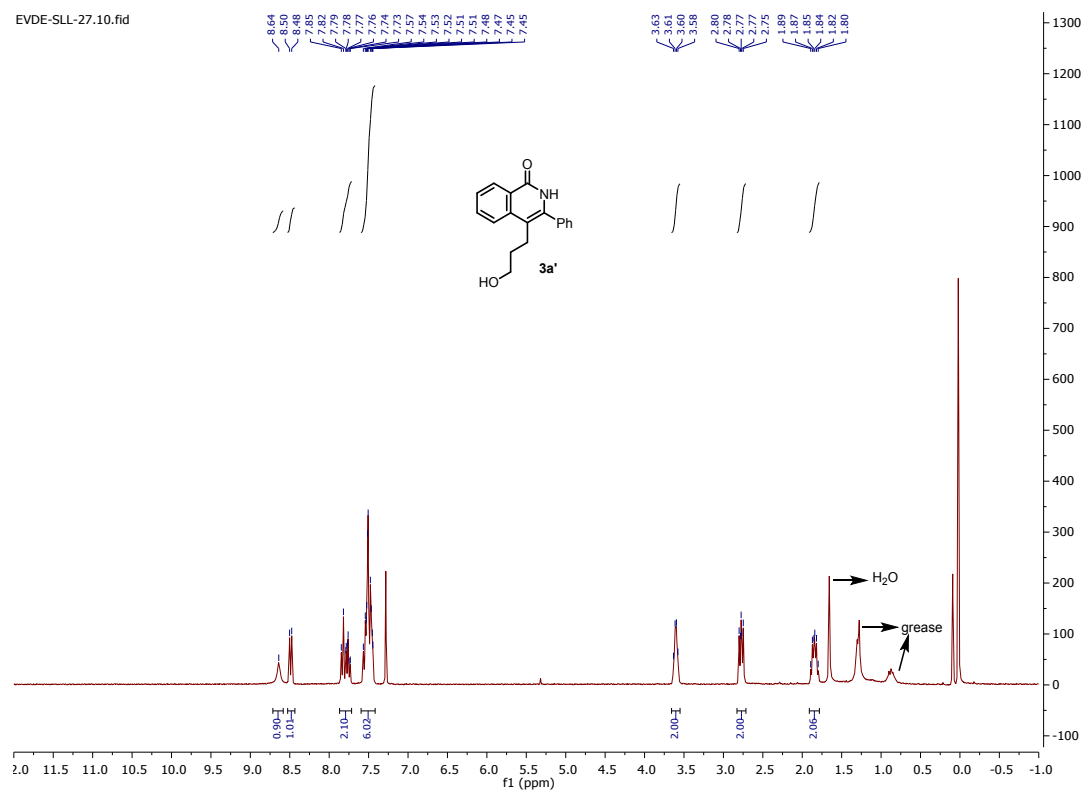

EVDE-SLL-5-1

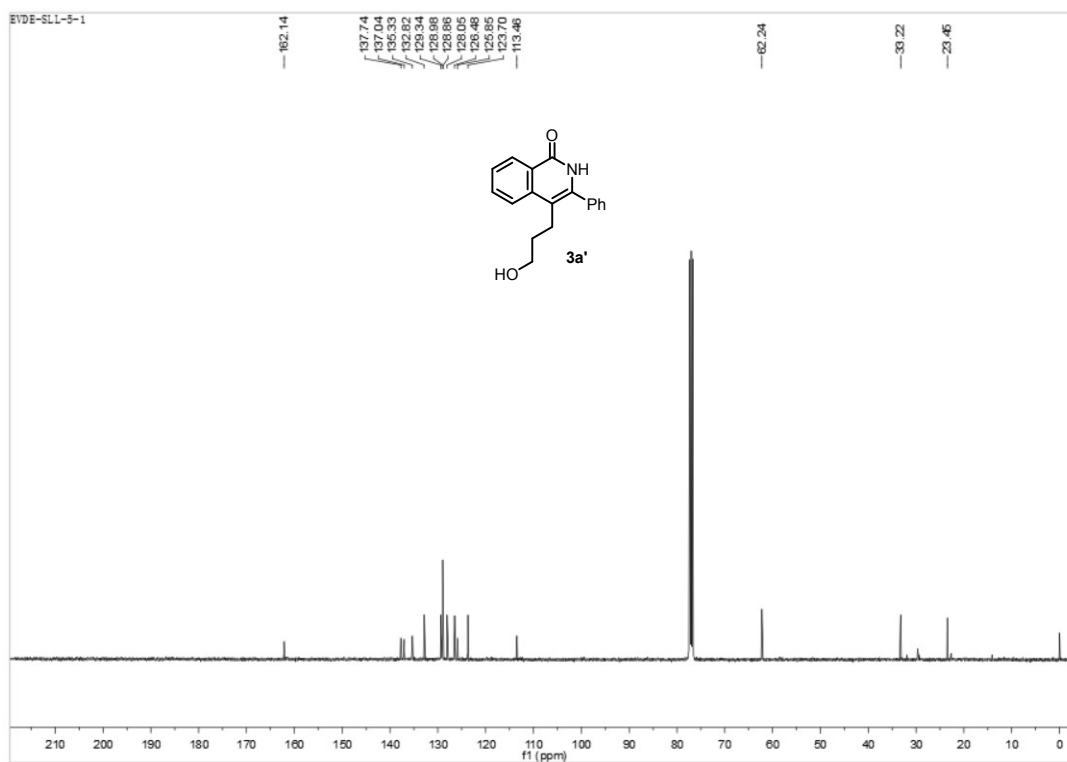

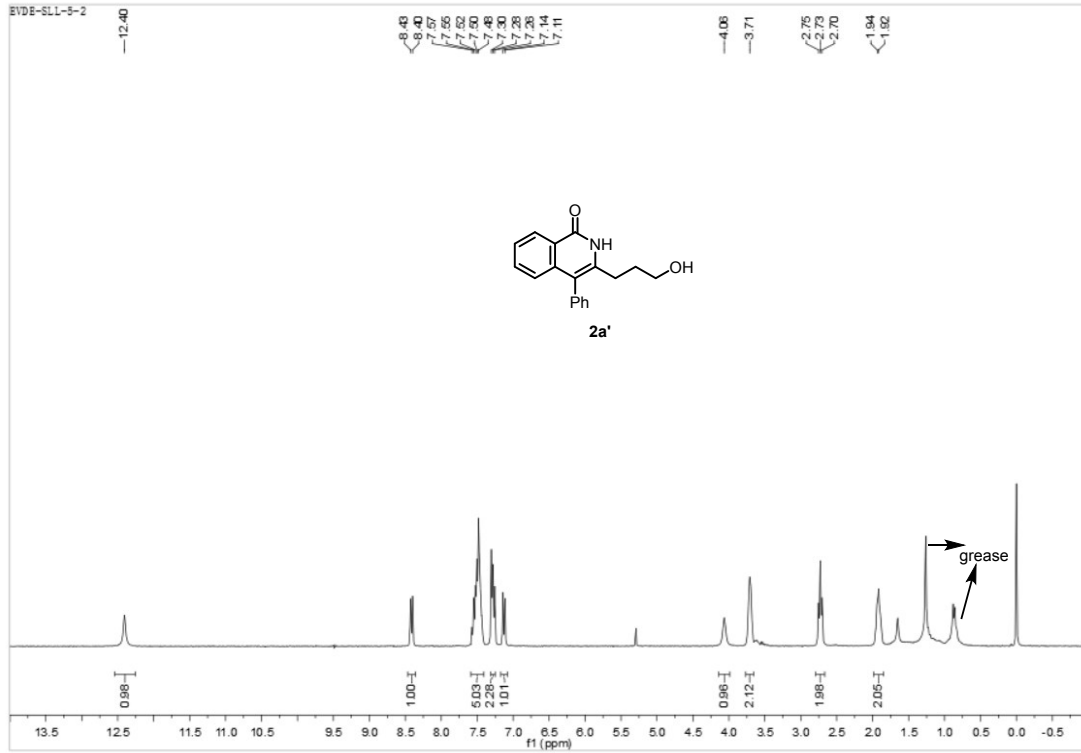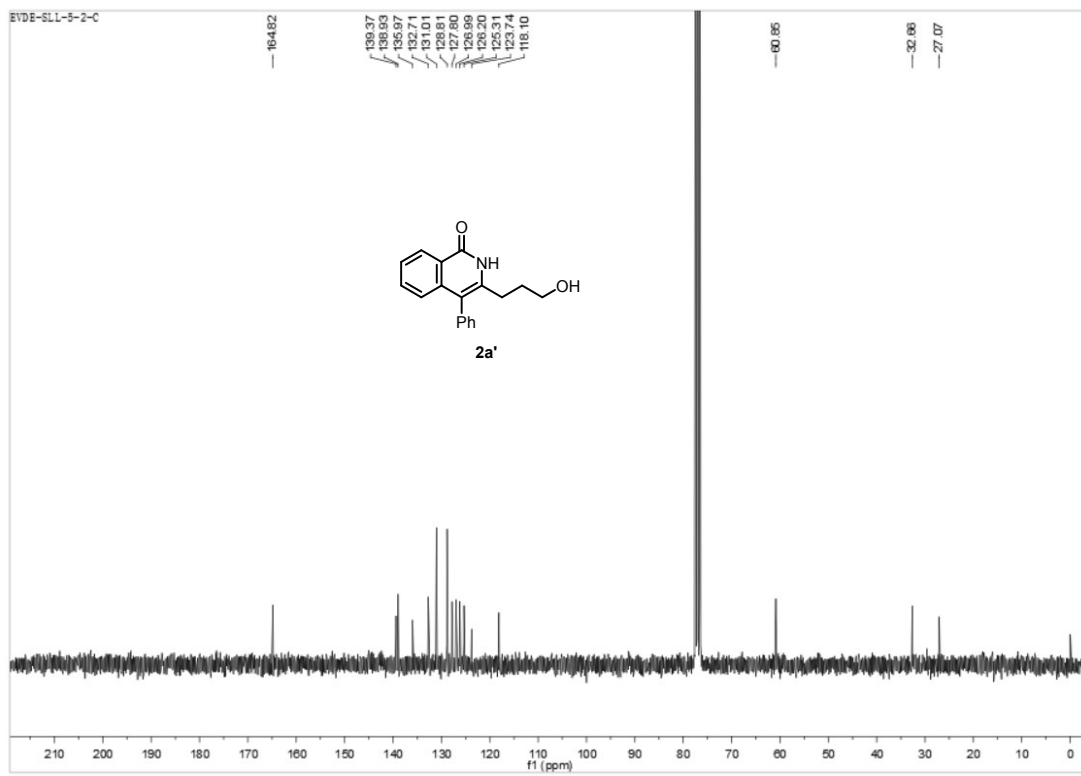

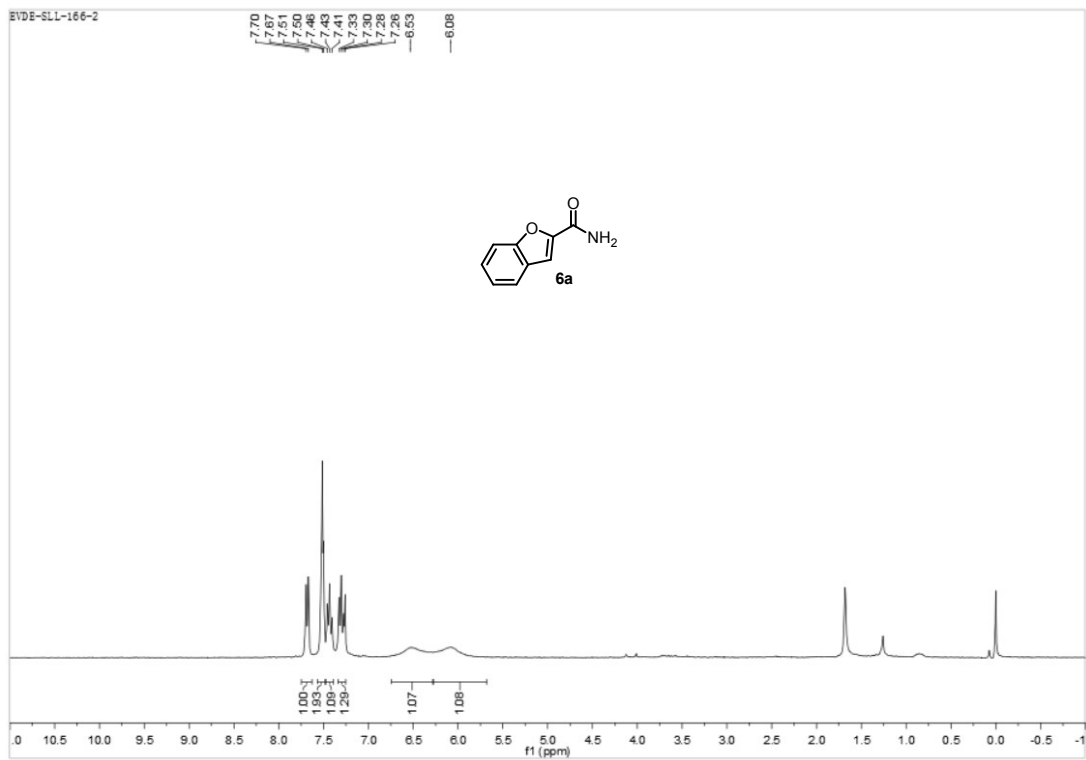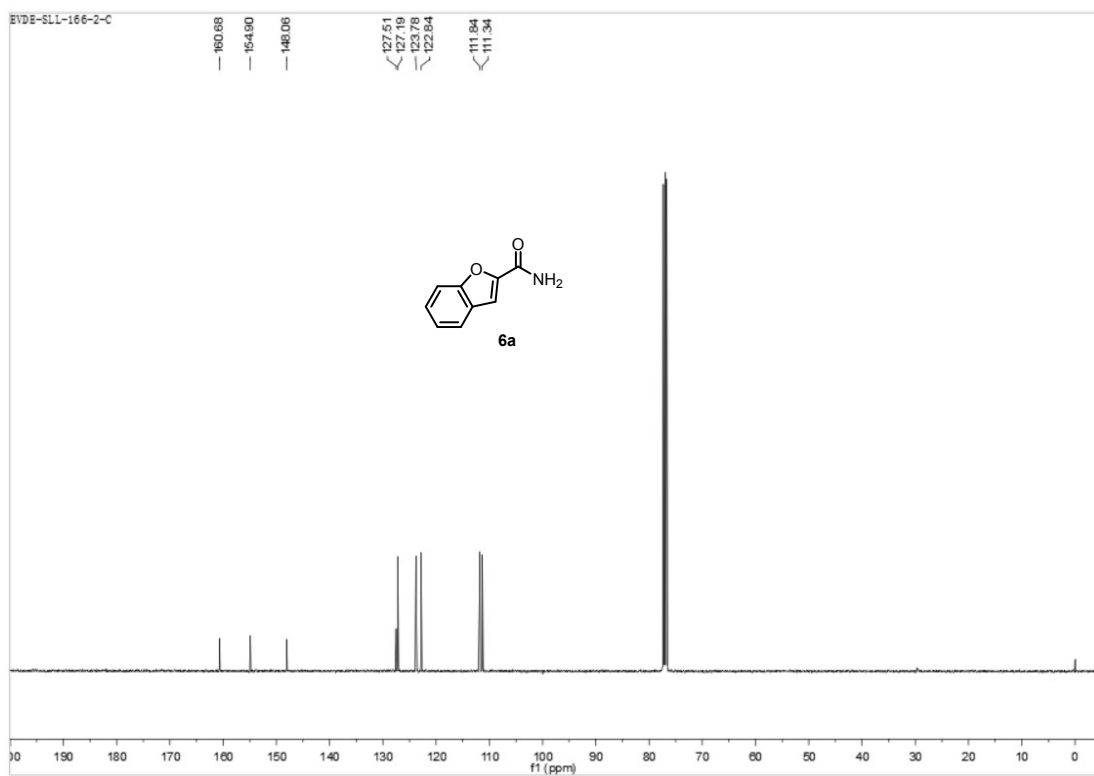



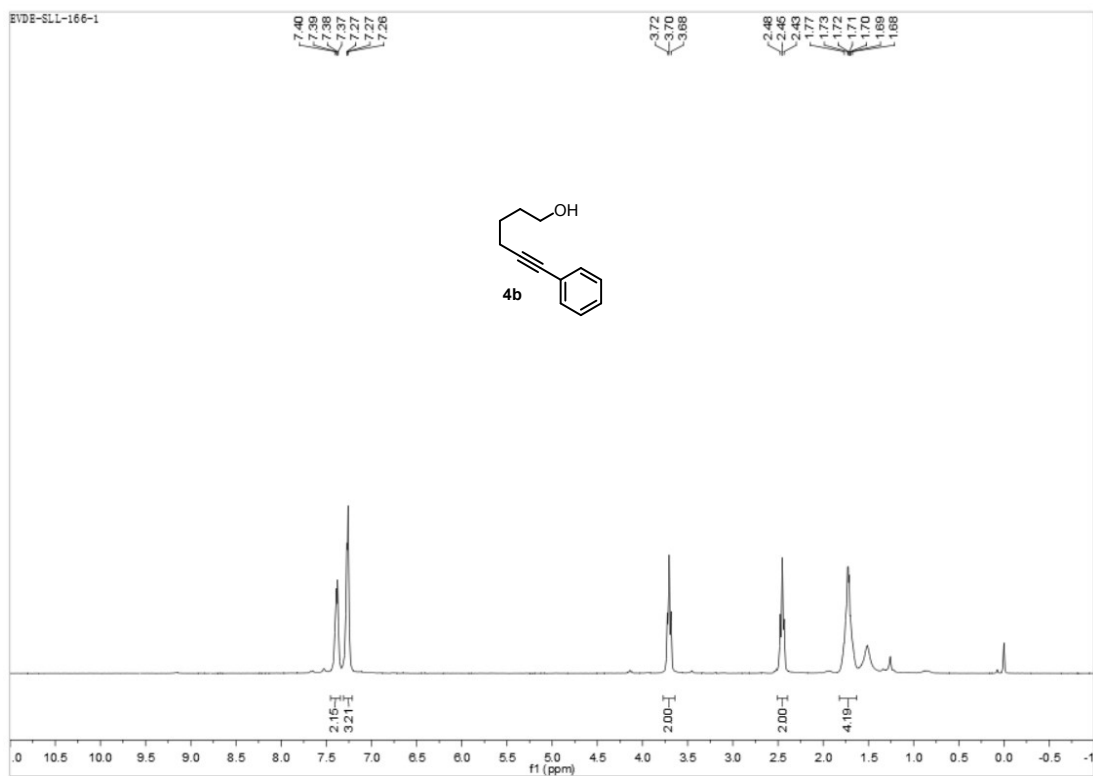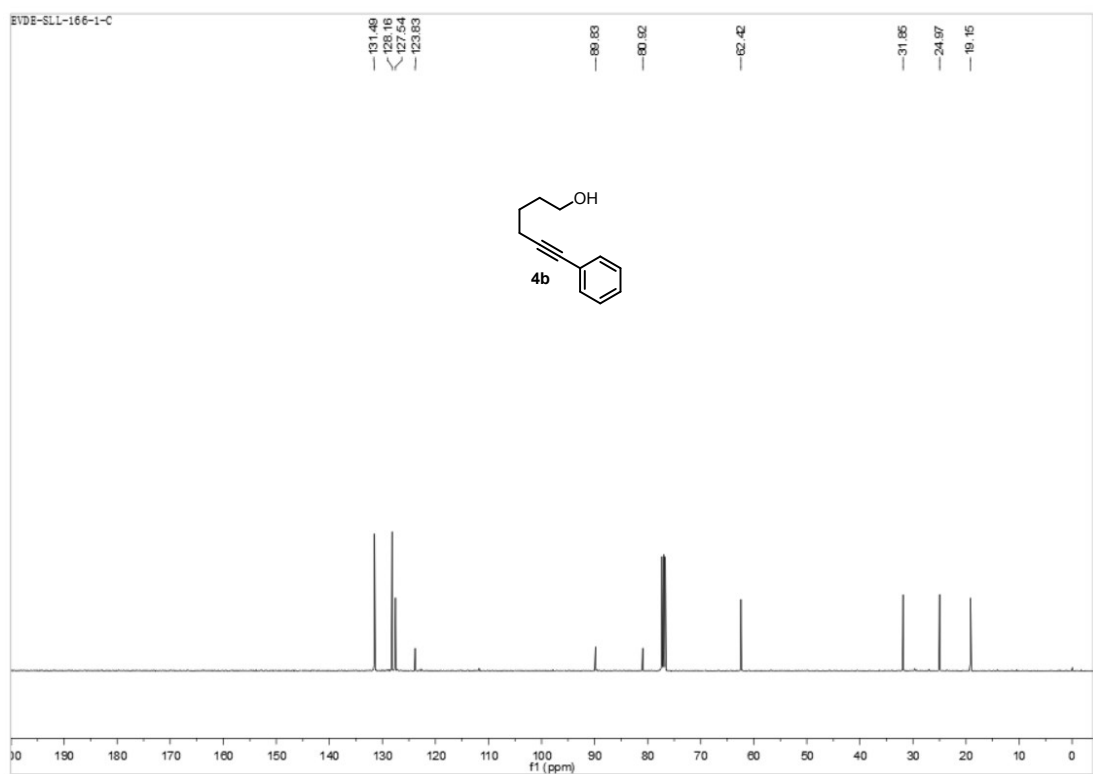

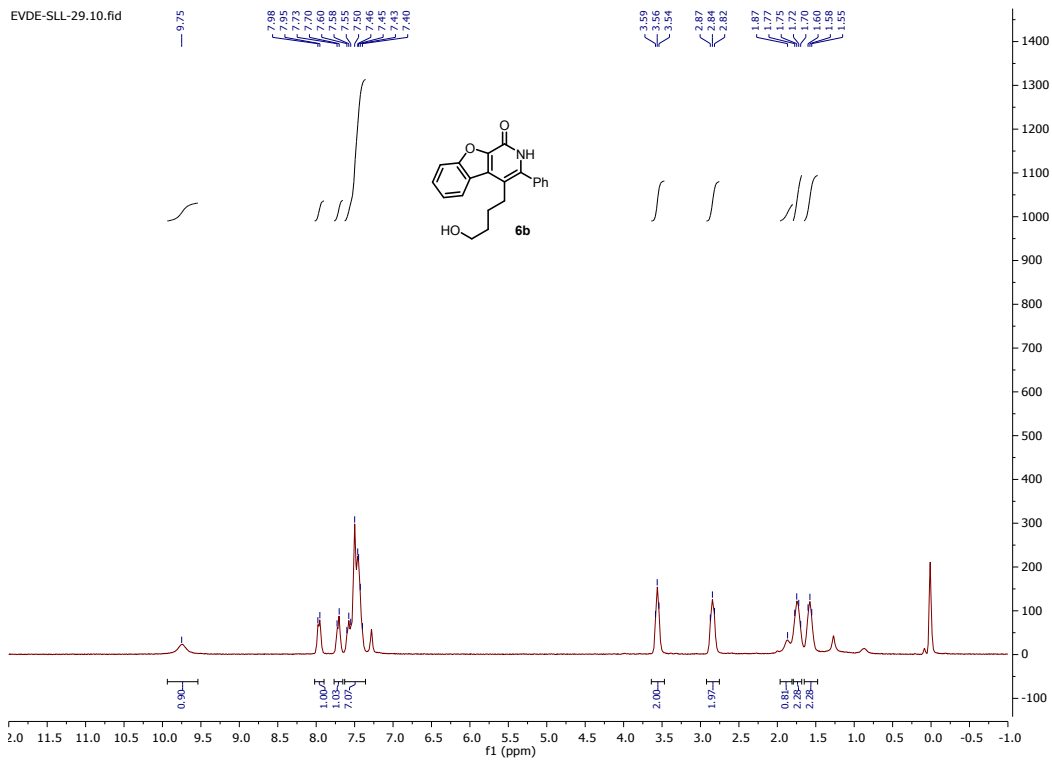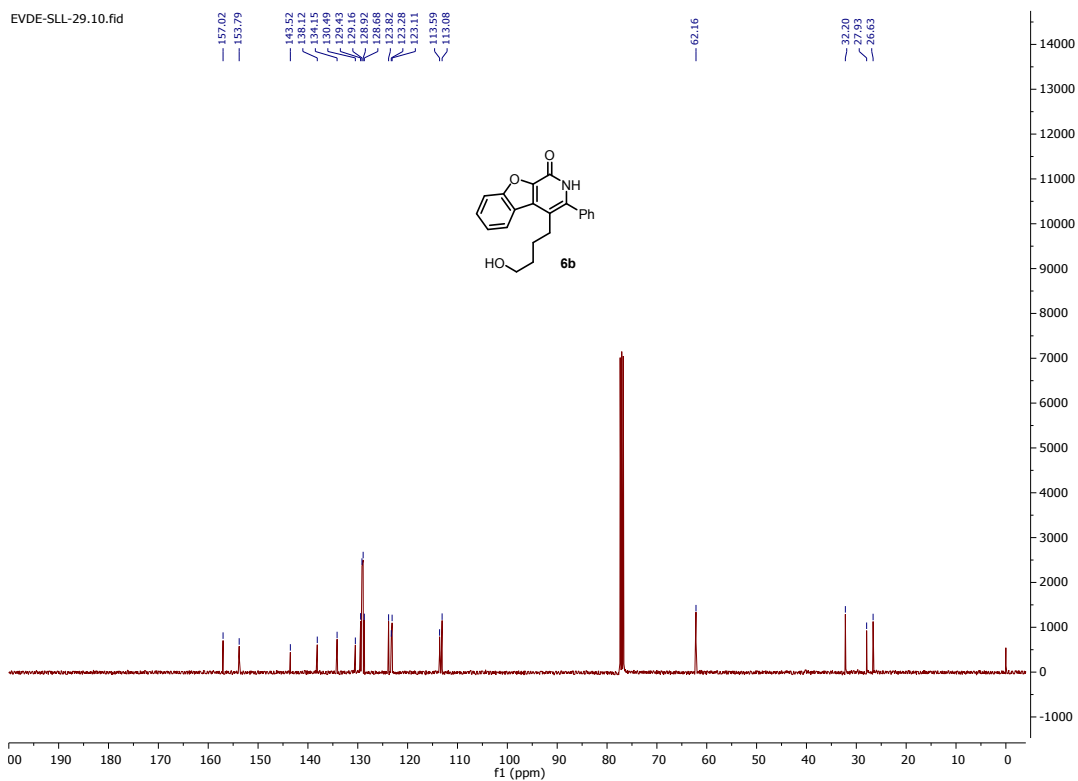

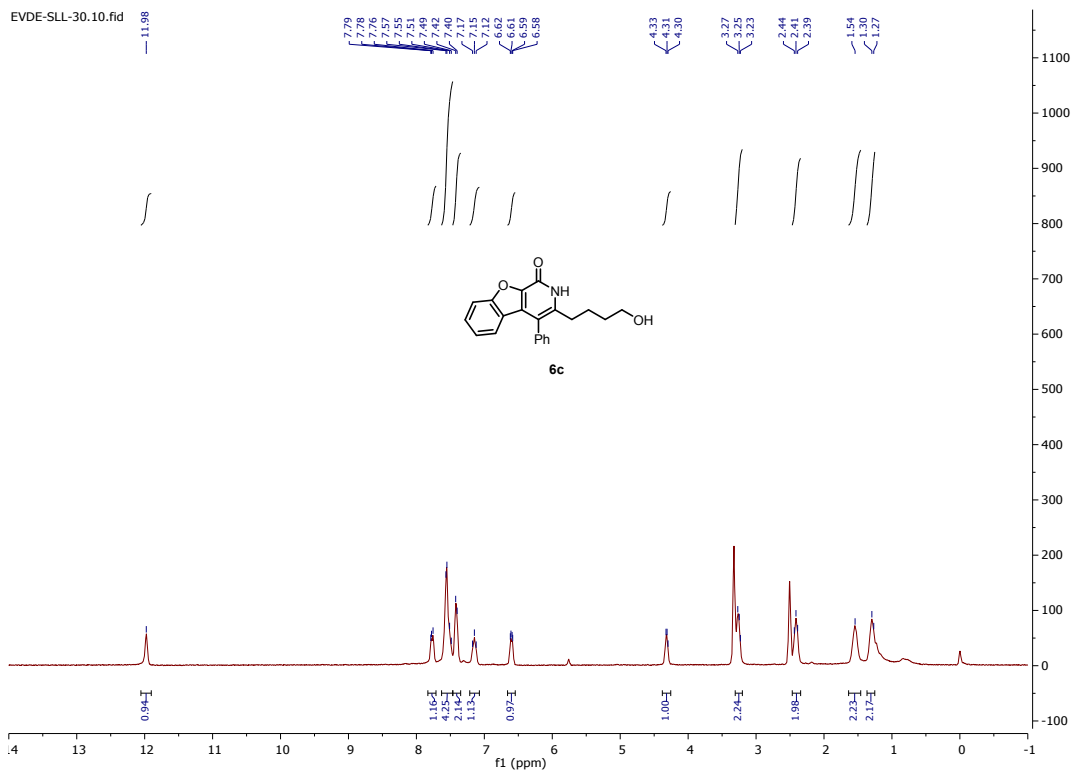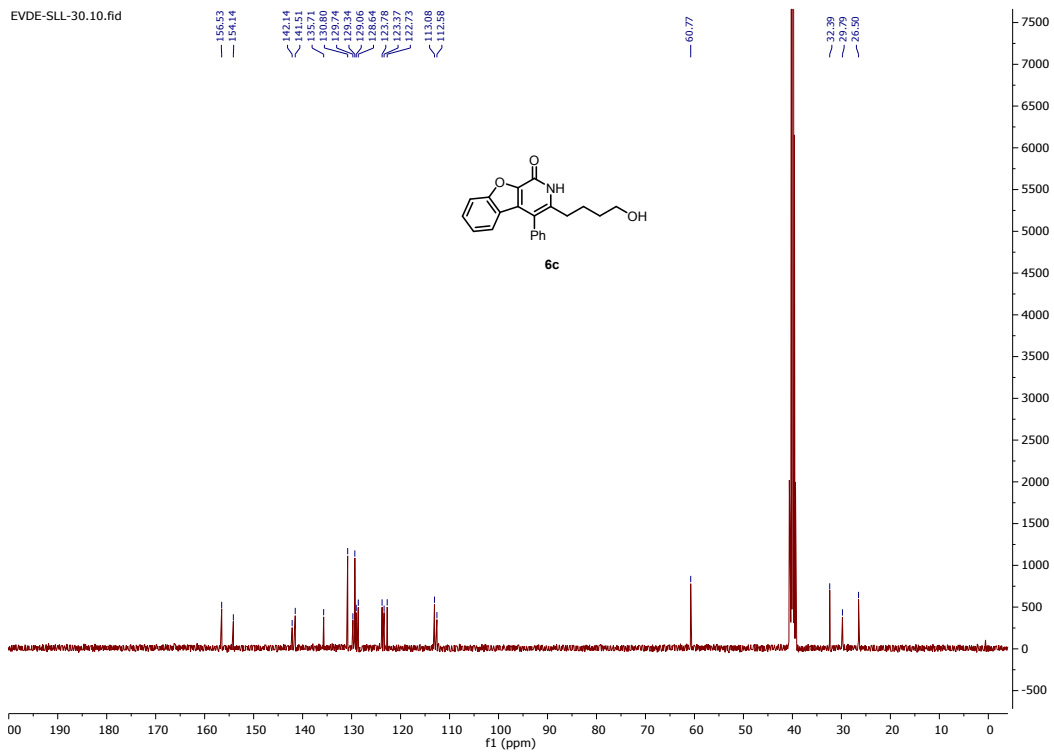

---

## 9. Cartesian Coordinates of DFT Optimized Structures

| Coordinates                     |                                               |
|---------------------------------|-----------------------------------------------|
| Three-Carbon Tethered Substrate | C,0,4.2074355568,-0.7526022737,1.1014202358   |
| <b>1a'</b>                      | H,0,5.2492032075,-1.074483647,1.1951148121    |
|                                 | H,0,4.2339214258,0.3321387815,0.9490101817    |
|                                 | C,0,3.4939383845,-1.0356593938,2.3380597652   |
|                                 | C,0,2.8433225154,-1.2528262212,3.3266895962   |
|                                 | C,0,1.9744293525,-1.4684419661,4.4342999274   |
|                                 | C,0,0.7302031696,-0.81859031,4.4691539112     |
|                                 | C,0,2.3229278379,-2.3250735596,5.4874530786   |
|                                 | C,0,-0.1372280446,-1.0286739973,5.5312486545  |
|                                 | H,0,0.4655405018,-0.1583844289,3.6538249614   |
|                                 | C,0,1.448441032,-2.527967645,6.5461950291     |
|                                 | H,0,3.2810157848,-2.8278440878,5.4646556693   |
|                                 | C,0,0.216008303,-1.8825734318,6.5725072871    |
|                                 | H,0,-1.0949385203,-0.522881187,5.5472454968   |
|                                 | H,0,1.7295181911,-3.1927439775,7.3535908089   |
|                                 | H,0,-0.4639861055,-2.0433074368,7.3996812251  |
|                                 | <sup>1</sup> A                                |
|                                 | C,0,0.0785665153,2.3943149351,-0.5030238932   |
|                                 | C,0,-1.3204529844,2.2943034096,-0.4327293118  |
|                                 | C,0,-1.9886052173,1.028034894,-0.5182682413   |
|                                 | C,0,-1.1905168478,-0.1169115846,-0.7073571937 |
|                                 | C,0,0.2300184756,-0.0294861771,-0.7594832693  |
|                                 | C,0,0.8808485202,1.216756706,-0.6309969548    |
|                                 | H,0,0.5567590995,3.3512626716,-0.3416529277   |
|                                 | H,0,-1.9018995819,3.1794458555,-0.208143472   |

---

|                                               |                                               |
|-----------------------------------------------|-----------------------------------------------|
| H,0,-1.6281407428,-1.101538011,-0.6755897582  | O,0,-0.3632723962,-2.3690661323,0.9669056204  |
| H,0,0.8009776962,-0.945276976,-0.7701647705   | O,0,-0.5703297763,-0.6098387436,2.3636657799  |
| C,0,2.3760763128,1.3133314116,-0.5652188588   | O,0,0.7751295351,1.7482533627,2.6207994083    |
| H,0,2.7730923322,1.6204653552,-1.5366530455   | O,0,-1.3816509831,1.9383970007,2.7444975373   |
| H,0,2.6833404939,2.0497290157,0.1776364843    |                                               |
| H,0,2.8180192469,0.3536615905,-0.3014866362   | <sup>3</sup> A                                |
| C,0,-3.4934579495,0.95819374,-0.366568793     | C,0,-1.1037382856,2.8100286392,0.013903917    |
| H,0,-3.7905993134,1.8532827277,0.1882553317   | C,0,-2.128993543,1.8549545129,-0.0711983092   |
| C,0,-4.1535968223,1.0140515713,-1.7525796513  | C,0,-1.8773798875,0.5197244825,-0.5228476052  |
| H,0,-5.2406973604,1.0372324397,-1.6564661216  | C,0,-0.5551532178,0.1720295087,-0.8488019264  |
| H,0,-3.8426029179,1.8999244818,-2.3100000871  | C,0,0.4885702762,1.0623967464,-0.5578005322   |
| H,0,-3.8845206782,0.1338107706,-2.3410824013  | C,0,0.2318231785,2.4089691983,-0.1424506635   |
| C,0,-3.9671266008,-0.2572577174,0.4345059528  | H,0,-1.3348817406,3.825349486,0.3071885922    |
| H,0,-3.4650504466,-0.3085419113,1.4010132786  | H,0,-3.139010497,2.1241467573,0.1982970622    |
| H,0,-5.0429318256,-0.1908485678,0.6050200207  | H,0,-0.3236962988,-0.8168405852,-1.2183157307 |
| H,0,-3.7780108286,-1.1914843099,-0.0973589633 | H,0,1.5147912728,0.7425613972,-0.6571825021   |
| Ru,0,-0.4730976405,0.9568816322,1.0583656411  | C,0,1.3727142361,3.3644124076,0.0517617962    |
| C,0,-0.4964024405,-1.8787935643,2.0812776137  | H,0,1.6757165905,3.7757404243,-0.9154779311   |
| C,0,-0.2481091832,2.0736442578,3.2953519621   | H,0,1.0880045412,4.1934890487,0.6989061066    |
| C,0,-0.5923910822,-2.748763637,3.3241341047   | H,0,2.2276671462,2.8489522964,0.4849531192    |
| H,0,-0.5578845021,-3.8005035116,3.0500367092  | C,0,-3.0355201981,-0.4375996639,-0.7177541936 |
| H,0,0.2327976285,-2.5127674102,3.9979938451   | H,0,-3.8708415975,-0.0289154579,-0.1488371662 |
| H,0,-1.5189952869,-2.5297279967,3.8567743949  | C,0,-3.4220638584,-0.4730127043,-2.2048209003 |
| C,0,-0.1245038539,2.5622362637,4.703944585    | H,0,-4.2989132765,-1.1062817204,-2.3508932682 |
| H,0,0.8331257672,3.0578411336,4.8524425395    | H,0,-3.6583443717,0.5245217304,-2.5800439863  |
| H,0,-0.9487768766,3.229750065,4.9486449674    | H,0,-2.6085447379,-0.8784702606,-2.8118300048 |
| H,0,-0.1727232247,1.6964033693,5.3680407841   | C,0,-2.7539023009,-1.8423930818,-0.1777659438 |

---

|                                               |                                                |
|-----------------------------------------------|------------------------------------------------|
| H,0,-2.4580649448,-1.8050792756,0.8707377311  | H,0,-3.9316927723,0.9914577087,-1.9727058973   |
| H,0,-3.6518749055,-2.4567225042,-0.2607784081 | H,0,-2.1878846117,0.2727634655,1.8947904346    |
| H,0,-1.9625108894,-2.3444133798,-0.7392177246 | H,0,-2.6221187165,-2.1396624165,1.6552163689   |
| Ru,0,-0.667032474,0.9192868369,1.4241570954   | C,0,-3.7798872067,-3.4424133141,-0.4884119439  |
| C,0,-3.2129137544,0.2808795179,2.8877389386   | H,0,-3.5019329392,-3.7126088622,-1.5070977783  |
| C,0,2.1052899896,0.7015573664,2.5572410124    | H,0,-3.1606437383,-4.0196881798,0.1965557929   |
| C,0,-3.7392661978,-0.3785856104,4.146642529   | H,0,-4.8246967448,-3.7225974117,-0.330048856   |
| H,0,-4.8101929883,-0.2134352167,4.2344566769  | C,0,-2.8707793516,2.3395156483,0.2320256723    |
| H,0,-3.5273718675,-1.4485121045,4.1144627106  | H,0,-2.0980929974,2.4335425218,0.9945473462    |
| H,0,-3.222569667,0.02700572,5.0173785792      | C,0,-2.3865317723,3.0681319189,-1.0231622872   |
| C,0,2.8563024844,0.5036264675,3.8585773281    | H,0,-2.1020378417,4.0887702267,-0.7633752036   |
| H,0,2.6949907571,1.3643365418,4.509325797     | H,0,-1.5254123732,2.5676975941,-1.4604224811   |
| H,0,2.4639438921,-0.3719344139,4.3776624078   | H,0,-3.1675554416,3.1287931579,-1.7851870324   |
| H,0,3.9180015323,0.3776804461,3.6614632765    | C,0,-4.1491826836,2.9806640495,0.7952562902    |
| O,0,-3.9409031949,0.8759024024,2.1091339591   | H,0,-4.4573253235,2.5022697371,1.7265662294    |
| O,0,-1.9197930151,0.120055641,2.7476001101    | H,0,-3.9790077903,4.0394986961,0.9985789704    |
| O,0,2.6687029519,0.7106154121,1.4734165345    | H,0,-4.9734737489,2.901879448,0.0812298987     |
| O,0,0.8193631215,0.8643754012,2.7454937266    | Ru,0,-1.8816320395,-0.7801150675,-0.8601495776 |
|                                               | C,0,0.7290761788,3.713999127,1.3960400506      |
| <sup>1</sup> A1                               | C,0,1.2156979652,4.5936403927,0.440839257      |
| C,0,-3.9911688428,-1.0391710445,-1.2878800576 | C,0,1.6480368749,4.1134837087,-0.7934666987    |
| C,0,-3.7437466177,0.3360154024,-1.1342565987  | C,0,1.5834350143,2.7535149514,-1.0693377093    |
| C,0,-3.1120504627,0.8585703402,0.0320039749   | C,0,0.6783215354,2.3439882732,1.1289194071     |
| C,0,-2.7377861965,-0.0719610017,1.0295562842  | H,0,0.3757342389,4.0692392121,2.3547439265     |
| C,0,-2.9994145494,-1.4628065493,0.9013309262  | H,0,1.2590769647,5.6538243665,0.6565447193     |
| C,0,-3.6051215608,-1.9705563563,-0.2667880392 | H,0,2.0281464468,4.8007418212,-1.5391015336    |
| H,0,-4.3946428516,-1.4099587671,-2.2207590482 | H,0,1.9023681213,2.3655736853,-2.0271329192    |

---

|                                              |                                              |
|----------------------------------------------|----------------------------------------------|
| C,0,0.102127508,1.4551420035,2.1863172362    | H,0,1.0102067039,-4.1720386965,-1.5409593135 |
| O,0,-0.7063197018,1.859667985,3.0138625562   | H,0,1.8922952214,-2.7278710153,-2.070950509  |
| O,0,-0.138329011,-0.7853030589,2.9077036914  | H,0,1.9248326819,-3.1787029558,-0.3578630548 |
| C,0,0.2639633836,-0.8377714213,4.2874234682  | O,0,-0.938046228,-2.4716938293,-1.7541248998 |
| H,0,-0.348175132,-1.6522924678,4.6806807099  | O,0,0.0786577514,-1.3746986692,-0.1979231636 |
| H,0,-0.0278589411,0.0918821073,4.7806268843  | C,0,1.0972852199,1.8699560242,-0.1143345981  |
| C,0,1.7426495765,-1.125196317,4.502083495    | H,0,1.0113360491,0.8264122549,-0.3766148913  |
| H,0,1.8718098737,-1.3114397377,5.5717998877  | C,0,0.0444782454,1.3023719747,-4.2125665414  |
| H,0,2.3329270222,-0.240345898,4.2639050523   | H,0,1.0150508175,1.2931034139,-4.7037142195  |
| C,0,2.2799859737,-2.3359544194,3.6969143081  | H,0,-0.1917775125,2.3134688652,-3.8759119706 |
| H,0,2.9921312387,-2.8923894371,4.3124212141  | H,0,-0.7319235103,1.0040835971,-4.918255193  |
| H,0,1.4588655887,-3.0252526478,3.4768124244  | C,0,0.0467002511,0.3596519423,-3.0178894237  |
| C,0,2.9519119738,-1.957635146,2.4590224345   | O,0,-1.1014538166,0.3339102657,-2.4167934439 |
| C,0,3.5509365284,-1.5812166099,1.4829068598  | O,0,1.0606656838,-0.2533588511,-2.7013083563 |
| C,0,4.2671726279,-1.1226795202,0.3366854439  | N,0,0.5686196605,0.17652704,2.1921234586     |
| C,0,3.5812246555,-0.6704169922,-0.797495834  | H,0,1.0164223583,-0.247428357,1.3912942194   |
| C,0,5.6703362975,-1.1123242952,0.328131597   |                                              |
| C,0,4.2756689334,-0.2247200998,-1.9120815822 | <sup>3</sup> A1                              |
| H,0,2.503696182,-0.6760603908,-0.8188465968  | C,0,3.9830189919,0.2369173561,-1.4679288204  |
| C,0,6.3598301671,-0.6609014478,-0.7879394473 | C,0,3.7215195756,-0.6556621311,-0.387623727  |
| H,0,6.2079977122,-1.4591302046,1.200991564   | C,0,3.1442904356,-0.2028473501,0.8217395676  |
| C,0,5.6665871939,-0.2169030771,-1.911423211  | C,0,2.610646739,1.0993352241,0.812221334     |
| H,0,3.7095220809,0.1034268839,-2.7739475258  | C,0,2.8101262917,1.9610839205,-0.301389278   |
| H,0,7.4427774052,-0.6568821768,-0.7820674401 | C,0,3.6315107793,1.5938712288,-1.389889924   |
| H,0,6.2102580577,0.1309664497,-2.7809690965  | H,0,4.4955510842,-0.1383684919,-2.3438165228 |
| C,0,0.1107335257,-2.3080722337,-1.0607790264 | H,0,4.0336051876,-1.6855256083,-0.4856541284 |
| C,0,1.3121486257,-3.1652554841,-1.2569331171 | H,0,2.0608898264,1.4693951208,1.6664641184   |

---

|                                              |                                               |
|----------------------------------------------|-----------------------------------------------|
| H,0,2.3771186702,2.9519575984,-0.2655271905  | O,0,-0.1955027106,2.6765496486,1.492121087    |
| C,0,3.9053566267,2.5517991223,-2.5075428562  | C,0,-0.8474787675,3.5691249512,2.4148184623   |
| H,0,4.6464194619,2.1526576784,-3.1991780714  | H,0,-0.4568960484,4.5445093677,2.1175718026   |
| H,0,2.9830446748,2.736491811,-3.0619717957   | H,0,-0.5068462412,3.3433228141,3.427927282    |
| H,0,4.2688578802,3.5048721146,-2.1189355269  | C,0,-2.3692271631,3.5530567842,2.3526164995   |
| C,0,3.0078252379,-1.097715617,2.0330216591   | H,0,-2.7096010402,4.3926173823,2.9646968367   |
| H,0,2.2553655232,-0.6457558333,2.6805788878  | H,0,-2.7499892817,2.6479084885,2.8248783434   |
| C,0,2.5501022077,-2.5194614031,1.6890947776  | C,0,-2.9651847992,3.678732138,0.9253932786    |
| H,0,2.3487624921,-3.0698244398,2.6084364605  | H,0,-3.8289315221,4.3487427012,0.9527148957   |
| H,0,1.6380141425,-2.515121718,1.0928012888   | H,0,-2.2339950986,4.1482015388,0.2597433942   |
| H,0,3.3150127581,-3.0692394426,1.1365652489  | C,0,-3.3913924142,2.4044818695,0.3573348666   |
| C,0,4.3394360809,-1.1117486653,2.8023127424  | C,0,-3.7433582394,1.32663622,-0.0515699792    |
| H,0,4.6419207044,-0.1045248796,3.0935692089  | C,0,-4.1428985596,0.036513441,-0.5137114606   |
| H,0,4.2400945735,-1.7118241889,3.7086846143  | C,0,-3.3771197653,-0.6537316062,-1.4634331104 |
| H,0,5.1374485426,-1.5457942135,2.1945775418  | C,0,-5.2986176285,-0.5733958094,-0.0034492233 |
| Ru,0,1.7018680586,0.0795208043,-1.0649083341 | C,0,-3.7598739667,-1.9160074475,-1.8927491476 |
| C,0,-0.5136031827,-1.7355179678,3.4418979234 | H,0,-2.4669286528,-0.2217143267,-1.8476893957 |
| C,0,-0.8719523097,-3.0731203097,3.3630585484 | C,0,-5.6726854023,-1.8381434236,-0.4341399181 |
| C,0,-1.3855368748,-3.5884880207,2.1761847268 | H,0,-5.8922681246,-0.0487192073,0.7336738344  |
| C,0,-1.5332480168,-2.7606116348,1.0696209317 | C,0,-4.9073980021,-2.5132868286,-1.3813054715 |
| C,0,-0.662805652,-0.8974195926,2.335145437   | H,0,-3.1443962469,-2.4194374327,-2.6267461905 |
| H,0,-0.1113669489,-1.3173985252,4.354686818  | H,0,-6.565450486,-2.2985974308,-0.0295749071  |
| H,0,-0.7549947791,-3.7141453973,4.2278332349 | H,0,-5.2051026927,-3.49912726,-1.7163655889   |
| H,0,-1.6707071721,-4.6313722239,2.1152519826 | C,0,-0.1665739127,1.4379511289,-2.32928657    |
| H,0,-1.9418718722,-3.1445331089,0.1447186176 | C,0,-1.3859588313,2.0667598664,-2.9303343318  |
| C,0,-0.239577224,0.5324538028,2.5000018142   | H,0,-1.1049527771,2.9385462634,-3.5186065199  |
| O,0,0.4459714784,0.908618251,3.4450121369    | H,0,-1.8324302125,1.3303489715,-3.6020502357  |



---

|                                               |                                               |
|-----------------------------------------------|-----------------------------------------------|
| H,0,-2.1146803719,2.3263164069,-2.1652525556  | H,0,4.1054640418,3.0337004957,-0.2290258889   |
| O,0,0.9326585122,1.4460106306,-2.919165322    | H,0,4.1196300942,2.4603132515,1.4404944462    |
| O,0,-0.2600873111,0.8591096896,-1.1860823567  | H,0,5.5358390298,2.2035737399,0.4020865725    |
| C,0,-1.1694125007,-1.4230536434,1.144485383   | C,0,1.7863429443,-2.7397114916,-1.259713979   |
| H,0,-1.2771438986,-0.8145627988,0.2597098466  | H,0,1.1632205625,-3.002525442,-0.402436861    |
| C,0,-0.083686742,-3.6073380264,-2.4195892334  | C,0,0.8594414906,-2.5383253267,-2.4602660679  |
| H,0,-0.9932688627,-3.8772367313,-2.9511748031 | H,0,0.2300042678,-3.4206337671,-2.5826631871  |
| H,0,-0.1217279674,-3.9742686977,-1.3933588825 | H,0,0.2121699852,-1.6734966449,-2.3213079472  |
| H,0,0.7743588233,-4.0785554661,-2.9020149378  | H,0,1.4216350936,-2.4091304709,-3.3887646229  |
| C,0,0.1015754456,-2.0991829285,-2.4238328255  | C,0,2.7734181475,-3.8922589614,-1.5014997926  |
| O,0,1.1444786016,-1.738114189,-1.7124076826   | H,0,3.3945848522,-4.0768669466,-0.6232611164  |
| O,0,-0.6431393156,-1.3582845896,-3.0393624371 | H,0,2.2296706023,-4.8100869018,-1.7322471555  |
| N,0,-0.7113957184,1.3876326695,1.5583949097   | H,0,3.4342856632,-3.6709136888,-2.3436372486  |
| H,0,-1.0049810999,1.0938946021,0.6346269178   | Ru,0,1.7734012676,0.4602762014,-0.2469314995  |
|                                               | C,0,0.1020167119,-2.8602120785,2.2482871327   |
| <sup>1</sup> A2                               | C,0,-0.519722045,-3.9816356826,1.7161556519   |
| C,0,3.6430735489,0.6459529928,-1.4082752358   | C,0,-1.4526994506,-3.839705403,0.6913157271   |
| C,0,2.9980406449,-0.5231512827,-1.8236022276  | C,0,-1.7622554117,-2.572307739,0.2103425686   |
| C,0,2.5554511122,-1.4959543625,-0.8648771425  | C,0,-0.1812719039,-1.5876431997,1.7471141496  |
| C,0,2.8826848222,-1.278372785,0.4906282197    | H,0,0.808518373,-2.9483979137,3.0636754627    |
| C,0,3.5276675566,-0.0838998199,0.9165459181   | H,0,-0.2853116346,-4.9648978251,2.1051324352  |
| C,0,3.8812541584,0.9130079005,-0.0163444911   | H,0,-1.9460126633,-4.7124835494,0.2813910268  |
| H,0,3.8628588008,1.4175342168,-2.135115902    | H,0,-2.5064909674,-2.4491189908,-0.5657540876 |
| H,0,2.7367022873,-0.6374203852,-2.8657283162  | C,0,0.5309537293,-0.4134394112,2.36336519     |
| H,0,2.5276956349,-1.9779682589,1.2334022594   | O,0,0.893389877,-0.4595843325,3.5384930227    |
| H,0,3.6174484293,0.1174201161,1.9753567765    | N,0,0.6684300901,0.6647202233,1.5340506339    |
| C,0,4.4429144384,2.2306184196,0.4261063794    | O,0,1.2635802108,1.7935482123,2.191654143     |

---

|                                               |                                               |
|-----------------------------------------------|-----------------------------------------------|
| C,0,0.4773091316,2.3558182981,3.2577543373    | O,0,1.0423412845,2.4007795564,-0.7851262485   |
| H,0,0.8441727387,3.3842690217,3.3207545852    | O,0,-0.04050486,0.6371743469,-1.4166622196    |
| H,0,0.7047852963,1.830996578,4.1874629822     | C,0,-1.1286654294,-1.4506039122,0.7326486062  |
| C,0,-1.0248179807,2.3317685571,3.0222328324   | H,0,-1.3719264804,-0.4663818359,0.3649411235  |
| H,0,-1.5040843073,2.8191031856,3.8746819652   |                                               |
| H,0,-1.3719660764,1.3005513429,3.0242793733   | <sup>3</sup> A <sub>2</sub>                   |
| C,0,-1.4442222566,3.0225189375,1.7017609554   | C,0,-3.1619910115,-0.0919619019,-1.9403304011 |
| H,0,-1.7867511917,4.0427570074,1.8974245973   | C,0,-2.2340296026,0.9815054405,-1.8483849803  |
| H,0,-0.5653382655,3.104753209,1.0575588072    | C,0,-2.0300447598,1.6745665134,-0.6439735807  |
| C,0,-2.4670468075,2.28258119,0.9782052874     | C,0,-2.674109459,1.1304249719,0.4927413052    |
| C,0,-3.2491364277,1.5996360217,0.3660313156   | C,0,-3.6199884685,0.0703397828,0.3998293726   |
| C,0,-4.0917046609,0.7558193835,-0.4140829474  | C,0,-3.9376754206,-0.5125756971,-0.8425402808 |
| C,0,-3.558128262,0.0614648285,-1.5118881445   | H,0,-3.2691314226,-0.6024406363,-2.888676158  |
| C,0,-5.4483563056,0.5888035736,-0.1034815349  | H,0,-1.6490679657,1.2290623061,-2.7201678153  |
| C,0,-4.3645705479,-0.7730268876,-2.2723546879 | H,0,-2.4609081236,1.5532125156,1.4654285107   |
| H,0,-2.507290268,0.1718844945,-1.7458523359   | H,0,-4.0997402695,-0.2893272521,1.3007880902  |
| C,0,-6.2469770659,-0.2493612679,-0.8687204862 | C,0,-4.9830234429,-1.5788450645,-0.9697647648 |
| H,0,-5.864031364,1.1183424722,0.7436453766    | H,0,-4.7525480858,-2.2611716123,-1.7876473992 |
| C,0,-5.7102285903,-0.9330550443,-1.9553155254 | H,0,-5.0677038835,-2.1568069719,-0.04977731   |
| H,0,-3.9389238464,-1.3046120158,-3.114658861  | H,0,-5.9577749166,-1.1269906254,-1.1748206394 |
| H,0,-7.2925796838,-0.3710751458,-0.6148362744 | C,0,-1.1467616517,2.8916727076,-0.5150140918  |
| H,0,-6.3361262413,-1.5867912448,-2.5494730699 | H,0,-0.6916534485,2.8414193213,0.4756544401   |
| C,0,0.0613188749,1.9023321978,-1.4149207635   | C,0,-0.0219567328,2.94469106,-1.5494597876    |
| C,0,-0.925024902,2.7682664881,-2.1302023131   | H,0,0.6737953069,3.7438589238,-1.2905747503   |
| H,0,-0.4883751702,3.7431943881,-2.3361532255  | H,0,0.5262099481,2.0049462701,-1.593901756    |
| H,0,-1.2428341152,2.2867671071,-3.0539556517  | H,0,-0.4069965995,3.1545265917,-2.5502659473  |
| H,0,-1.8036254291,2.8956618117,-1.4962084989  | C,0,-2.0140140662,4.1612986406,-0.5640845669  |

---

|                                                |                                              |
|------------------------------------------------|----------------------------------------------|
| H,0,-2.7872931316,4.1490920115,0.2065225753    | C,0,3.1569447862,-1.522600563,-0.1809662491  |
| H,0,-1.3928267077,5.0450851427,-0.4072889545   | C,0,3.9219342764,-0.3784552621,-0.5534626193 |
| H,0,-2.5044037998,4.2593509358,-1.5357192909   | C,0,3.4736320153,0.4662782919,-1.5813909244  |
| Ru,0,-1.5953831054,-0.6790680728,-0.3322718607 | C,0,5.094798085,-0.0418229937,0.137722006    |
| C,0,-0.1727623101,1.8323970861,3.2181097766    | C,0,4.180800275,1.6184190105,-1.8959281531   |
| C,0,0.5404474763,3.0179415002,3.1096097881     | H,0,2.5638937199,0.2272893059,-2.1158298561  |
| C,0,1.5519280515,3.139270838,2.1585744733      | C,0,5.794677803,1.1120873543,-0.1845706471   |
| C,0,1.8376191986,2.0759964898,1.310215231      | H,0,5.4403829644,-0.6870016646,0.9346294041  |
| C,0,0.0929848296,0.7690102424,2.3525090167     | C,0,5.3400950288,1.9482589035,-1.2002965187  |
| H,0,-0.9315994108,1.7069894589,3.9796205423    | H,0,3.8182067557,2.2636849849,-2.6863756069  |
| H,0,0.3204193309,3.8428791817,3.7757193417     | H,0,6.6952607246,1.3625227986,0.3620020205   |
| H,0,2.1195958307,4.0586110888,2.0855466739     | H,0,5.8861828168,2.8499096837,-1.4475679693  |
| H,0,2.6309624231,2.1541563986,0.5787667537     | C,0,0.3078192671,-1.3756300165,-2.5224483143 |
| C,0,-0.6513984836,-0.5168709323,2.5621786155   | C,0,1.1036526071,-2.4808906309,-3.183370553  |
| O,0,-0.9743378864,-0.8821764821,3.6842726014   | H,0,0.5253151168,-3.402523775,-3.2350477388  |
| N,0,-0.8555299022,-1.2654721298,1.418451579    | H,0,1.4202332146,-2.1677522434,-4.175678053  |
| O,0,-1.3019657236,-2.5888032183,1.6532538104   | H,0,1.9879827582,-2.672240912,-2.572244646   |
| C,0,-0.3907552646,-3.4189595503,2.4131089813   | O,0,-0.426392305,-1.7941132259,-1.5250712704 |
| H,0,-0.7050797514,-4.4290152085,2.1415323455   | O,0,0.3833645837,-0.2130080589,-2.8968712309 |
| H,0,-0.5724139234,-3.2552744815,3.4763827417   | C,0,1.1019299168,0.8993750045,1.3964153172   |
| C,0,1.0818692464,-3.1993631384,2.1052480401    | H,0,1.328409229,0.0725043987,0.7411322626    |
| H,0,1.6531075227,-3.8889066429,2.7315879191    |                                              |
| H,0,1.3709917854,-2.1988075081,2.4227262628    | <sup>1</sup> A <sub>3</sub>                  |
| C,0,1.4497928179,-3.3966367111,0.6144469051    | C,0,0.9909073999,-0.015569736,2.8592977768   |
| H,0,1.8099416083,-4.4154120867,0.4447604501    | C,0,2.1872521817,-0.5514978754,2.3010178188  |
| H,0,0.5577176507,-3.2691532978,-0.0024630429   | C,0,2.1606323032,-1.6674493223,1.4268217927  |
| C,0,2.4318910645,-2.424414588,0.1567395752     | C,0,0.8840949071,-2.2773319477,1.1762677672  |

---

|                                              |                                               |
|----------------------------------------------|-----------------------------------------------|
| C,0,-0.2925124681,-1.7456360793,1.6943157734 | H,0,4.2674383437,4.541709403,-1.0540677686    |
| C,0,-0.2567409433,-0.5544940956,2.4953683514 | H,0,3.1795631811,4.6377077246,1.1672978899    |
| H,0,1.0360652743,0.8676157776,3.4816358853   | H,0,1.7653015341,2.7888331341,1.950725451     |
| H,0,3.1234006721,-0.0505843588,2.4992159751  | C,0,2.424723855,0.3421443774,-1.9189466288    |
| H,0,0.8386502284,-3.1048645213,0.4809535667  | O,0,3.0173261798,0.0990464942,-2.9648765733   |
| H,0,-1.2503363414,-2.1569792537,1.4046953743 | N,0,1.4458609911,-0.4038821709,-1.3367977267  |
| C,0,-1.5456052222,0.0719465224,2.938615848   | O,0,1.3020112607,-1.7033921352,-1.8846729743  |
| H,0,-1.3844579275,1.0759192995,3.3296921482  | C,0,0.5074714768,-1.6962053716,-3.0758349811  |
| H,0,-2.2410334585,0.137258171,2.1019704354   | H,0,0.5707360398,-2.725845282,-3.4386345309   |
| H,0,-2.0115351651,-0.5320627084,3.7221293928 | H,0,0.9673876748,-1.0396063967,-3.8165903089  |
| C,0,3.3980100644,-2.2668397661,0.7913410889  | C,0,-0.9366866887,-1.2960927458,-2.8086973004 |
| H,0,3.1018677043,-2.561703659,-0.2191687186  | H,0,-1.4868515041,-1.2629759738,-3.7524532335 |
| C,0,4.5649753882,-1.288238814,0.6634971584   | H,0,-0.9390200955,-0.2882399468,-2.398507771  |
| H,0,5.3656459015,-1.7448833545,0.0805301909  | C,0,-1.6298833666,-2.2516584957,-1.8207201025 |
| H,0,4.2642674811,-0.3712404738,0.1589691759  | H,0,-1.8651835127,-3.1967230158,-2.3210474748 |
| H,0,4.9809776917,-1.0262691949,1.6398172684  | H,0,-0.9204613574,-2.4875639368,-1.025548434  |
| C,0,3.8160287789,-3.5285061372,1.5623152184  | C,0,-2.8305178242,-1.6902264654,-1.2212919709 |
| H,0,3.0001182302,-4.251403822,1.6241432127   | C,0,-3.7878578787,-1.1669992598,-0.7090788884 |
| H,0,4.6602140049,-4.0137169687,1.0689073514  | C,0,-4.8928308698,-0.501749477,-0.1048672107  |
| H,0,4.1196178795,-3.2758004129,2.5816316836  | C,0,-5.0961008212,-0.5572680255,1.2822119054  |
| Ru,0,0.9079356228,-0.0851218895,0.6304459289 | C,0,-5.7848719866,0.2498794298,-0.8846671363  |
| C,0,3.4559227056,2.6092407047,-1.5292960267  | C,0,-6.1538658099,0.1240259676,1.8676518138   |
| C,0,3.6484384736,3.7194811035,-0.7178675014  | H,0,-4.4175827014,-1.1391742359,1.8914851995  |
| C,0,3.0353477708,3.7703574135,0.5331127559   | C,0,-6.8400565058,0.928723803,-0.2930103911   |
| C,0,2.2363606431,2.71797384,0.9765423195     | H,0,-5.6380217176,0.2945841543,-1.9558073504  |
| C,0,2.6542237182,1.5622745527,-1.0807027471  | C,0,-7.0284414444,0.8709882642,1.084579271    |
| H,0,3.9152815143,2.5269041344,-2.5069735254  | H,0,-6.2965008179,0.0713435671,2.9397249084   |

---

|                                              |                                               |
|----------------------------------------------|-----------------------------------------------|
| H,0,-7.5193199551,1.5041598047,-0.909336592  | C,0,3.8806883702,0.9758082101,1.1554164537    |
| H,0,-7.852418433,1.401657131,1.544047727     | H,0,3.2176295624,1.8351789636,1.2936205252    |
| C,0,-1.1694392859,1.8464489433,-0.8631895623 | C,0,3.7901120738,0.1240786611,2.4222378298    |
| C,0,-2.5901833518,2.2010864146,-1.1676656193 | H,0,4.0367222786,0.7313864745,3.294693008     |
| H,0,-3.2351007335,1.898695629,-0.3481181555  | H,0,2.7880686584,-0.2820471991,2.5539443347   |
| H,0,-2.6871540002,3.2640345639,-1.37973041   | H,0,4.4969278819,-0.7084943188,2.3989999453   |
| H,0,-2.8916371124,1.6432020659,-2.0571835833 | C,0,5.3062146156,1.5044377614,0.9359074353    |
| O,0,-0.8868399807,0.9599365804,-0.0641569052 | H,0,5.3655247068,2.1467469576,0.0548563066    |
| O,0,-0.2873302059,2.543252202,-1.5481716329  | H,0,5.6389409802,2.0817947736,1.800770483     |
| C,0,2.0360674407,1.5852444748,0.1813412621   | H,0,6.0044722977,0.6756959702,0.7946878023    |
| H,0,0.6286009697,2.2739736776,-1.3089209507  | Ru,0,1.4435993725,-0.6108846789,-0.4896279634 |
|                                              | C,0,-0.3399440729,-2.0016394607,3.1534997927  |
| <sup>1</sup> B                               | C,0,0.1023999954,-3.3035277596,3.345510502    |
| C,0,3.0854289595,-1.7579595008,-1.4896662938 | C,0,0.9581215659,-3.881293115,2.4091148173    |
| C,0,3.5312760795,-1.1286885685,-0.2952614917 | C,0,1.3747013582,-3.1634750659,1.2897281342   |
| C,0,3.3982811425,0.2691888838,-0.0934745833  | C,0,0.0874228561,-1.2904437474,2.0359906609   |
| C,0,2.8179800518,1.0303254547,-1.1595124181  | H,0,-1.0202729683,-1.5226082779,3.8473617829  |
| C,0,2.3607634367,0.4272312117,-2.3336897709  | H,0,-0.2197987154,-3.8693921444,4.2107437499  |
| C,0,2.4273274404,-0.995908193,-2.4754191889  | H,0,1.3002336861,-4.9005251236,2.54990788     |
| H,0,3.155866958,-2.8315251602,-1.5949021422  | H,0,2.0282225002,-3.6461605185,0.5715216003   |
| H,0,3.925489044,-1.745558289,0.4991131237    | C,0,-0.4005798714,0.08941098,1.7658631014     |
| H,0,2.6644217964,2.0927872431,-1.0159123713  | O,0,-1.3054074823,0.6478009814,2.3806079429   |
| H,0,1.8597655586,1.0181547196,-3.0882577417  | N,0,0.3232550173,0.6094739881,0.7321522382    |
| C,0,1.8234351284,-1.6558554683,-3.6806785982 | O,0,-0.2527294646,1.7568839965,0.1213462571   |
| H,0,1.5846756631,-2.6990735312,-3.4785970713 | C,0,0.1661669251,3.0228266893,0.6510426957    |
| H,0,0.906876976,-1.1492401405,-3.9836471198  | H,0,0.4234569104,3.6452024303,-0.2140734308   |
| H,0,2.5216995215,-1.617077015,-4.5211057872  | H,0,1.0685984307,2.8551671684,1.2411754368    |

---

|                                               |                                              |
|-----------------------------------------------|----------------------------------------------|
| C,0,-0.9078818629,3.6943885499,1.4928665058   | H,0,-1.882882891,4.6748079473,-0.1850004688  |
| H,0,-0.4626097509,4.5983588803,1.9220751527   |                                              |
| H,0,-1.1838708534,3.0241613103,2.3061207514   | <sup>13</sup> C                              |
| C,0,-3.0123871808,2.9786448883,0.3286571818   | C,0,0.3572092113,1.7946017377,-1.9847827526  |
| C,0,-3.6693789929,2.0019931105,0.0791693016   | C,0,1.5432733815,1.0076371884,-2.011074495   |
| C,0,-4.3402341071,0.7670841023,-0.1484890389  | C,0,2.4708024869,1.0622744518,-0.9641467083  |
| C,0,-3.9891169186,-0.3539674778,0.6220320833  | C,0,2.2046384878,1.9752558812,0.1078878214   |
| C,0,-5.3294380146,0.6330226532,-1.1322877017  | C,0,1.0881019234,2.8199509048,0.0831399667   |
| C,0,-4.6157253989,-1.5730056807,0.4044773666  | C,0,0.1247641327,2.7305009791,-0.9550117822  |
| H,0,-3.2245188639,-0.2454982654,1.3805734879  | H,0,-0.36695831,1.6888635007,-2.7808580256   |
| C,0,-5.9533729449,-0.5902026569,-1.3391163619 | H,0,1.6728842253,0.2918060003,-2.808932265   |
| H,0,-5.6005083649,1.4935844717,-1.7298464692  | H,0,2.8765328698,1.9954355733,0.9546105848   |
| C,0,-5.5998562871,-1.6978471295,-0.5732271232 | H,0,0.9109326512,3.4941739992,0.9114900668   |
| H,0,-4.3318255632,-2.4302965983,1.0020320432  | C,0,-1.0819147654,3.6200324035,-0.9666925027 |
| H,0,-6.7174475903,-0.6798696632,-2.1014470977 | H,0,-1.9156430922,3.1434800325,-1.4805389189 |
| H,0,-6.0873513721,-2.6506231726,-0.73752794   | H,0,-1.3971099138,3.8620193813,0.0480033397  |
| C,0,-1.3566665229,-0.6290222294,-1.907007947  | H,0,-0.8540752018,4.5581499884,-1.4799919308 |
| C,0,-2.4072016148,-1.3440650726,-2.6963382885 | C,0,3.7005453581,0.1841096389,-0.8905438137  |
| H,0,-2.1007438613,-2.3675869622,-2.8918083661 | H,0,3.7951007624,-0.1042135455,0.1594339439  |
| H,0,-3.3306570792,-1.3433615107,-2.1145273937 | C,0,3.5933145736,-1.0991380713,-1.71405703   |
| H,0,-2.6060785017,-0.8092157036,-3.6246466095 | H,0,4.4459463526,-1.7442900898,-1.4995409074 |
| O,0,-0.4453135454,-1.2508266618,-1.3575433115 | H,0,2.6855344494,-1.6513261408,-1.4726395934 |
| O,0,-1.5154040523,0.6691761086,-1.8789533013  | H,0,3.6030342179,-0.8931140354,-2.7875507515 |
| C,0,0.9523005834,-1.8488599396,1.0858307675   | C,0,4.942426926,1.0004628413,-1.2830569749   |
| H,0,-0.9776457638,1.137537468,-1.1731149108   | H,0,5.0464067509,1.8967889533,-0.6685100415  |
| C,0,-2.1700206713,4.1054067281,0.7072079121   | H,0,5.8434080766,0.3977867956,-1.156549386   |
| H,0,-2.7578466285,4.791480283,1.3256655484    | H,0,4.8876668866,1.31193913,-2.3291781604    |

---

|                                               |                                               |
|-----------------------------------------------|-----------------------------------------------|
| Ru,0,0.4039485318,0.5980342097,-0.0752872263  | C,0,-3.7717152016,1.5550238273,0.2881384451   |
| C,0,-0.3745797957,-3.5577397139,-0.8095183567 | C,0,-3.4470272512,-0.8340123004,0.200512799   |
| C,0,-1.2284505563,-3.6151715945,-1.9042523532 | C,0,-5.0792053359,1.3931250002,-0.1491258728  |
| C,0,-1.6525731804,-2.4324251458,-2.5049255905 | H,0,-3.3918368451,2.5433992744,0.5063314258   |
| C,0,-1.237127406,-1.1978354107,-2.0096350295  | C,0,-4.7549621424,-0.9882243589,-0.2356812104 |
| C,0,-0.3759979327,-1.1236413116,-0.9151488986 | H,0,-2.8105227912,-1.6969846073,0.3311320751  |
| C,0,0.0496398218,-2.3222714292,-0.3311268629  | C,0,-5.574639782,0.1211370136,-0.4170716836   |
| H,0,-0.0201946956,-4.4524554176,-0.3117969577 | H,0,-5.7130601753,2.2618024966,-0.2775281484  |
| H,0,-1.5626409759,-4.5711163649,-2.2878805519 | H,0,-5.1326678737,-1.9821763352,-0.4391520018 |
| H,0,-2.3233098477,-2.4679406692,-3.3557649531 | H,0,-6.5936490477,-0.0044733644,-0.7605593902 |
| H,0,-1.6241627976,-0.2948750505,-2.466005485  |                                               |
| C,0,0.9915108754,-2.2171869376,0.8196167025   | <sup>3</sup> C                                |
| O,0,1.4493677214,-3.1653099464,1.4561805211   | C,0,0.1064897918,0.9457122407,-2.1703418703   |
| N,0,1.2458033649,-0.9058435545,1.0280181313   | C,0,1.4165196059,0.6461656504,-1.7527391152   |
| O,0,2.1564391569,-0.5530145526,2.0320374418   | C,0,2.1282939249,1.5255812262,-0.9180213485   |
| C,0,1.7305067783,-0.8910473749,3.3645487421   | C,0,1.4696221789,2.6922570835,-0.5175906653   |
| H,0,2.3944013653,-0.2911247385,3.9925943831   | C,0,0.1862800571,3.0023655179,-0.9561482777   |
| H,0,1.9184251552,-1.9509165766,3.544003249    | C,0,-0.5182976968,2.143279928,-1.7973626706   |
| C,0,0.2741294774,-0.5648023173,3.6665843265   | H,0,-0.3930207669,0.2717469802,-2.8548192294  |
| H,0,0.1578280142,-0.6151970026,4.752929586    | H,0,1.89539269,-0.2424904389,-2.1400822043    |
| H,0,-0.3767126878,-1.3306413915,3.2442192579  | H,0,1.9767425543,3.3801709775,0.1484096201    |
| C,0,-0.1899821335,0.8220062408,3.1717913615   | H,0,-0.2843467543,3.9191422572,-0.622407733   |
| H,0,-1.0161533739,1.1761062746,3.7963841869   | C,0,-1.890940685,2.4921397718,-2.2957386969   |
| H,0,0.6247015776,1.543272733,3.2770509252     | H,0,-2.4377180689,1.6029097936,-2.6080733201  |
| C,0,-0.6837695725,0.7863549609,1.7804278004   | H,0,-2.4763769131,2.9932538001,-1.5251226013  |
| C,0,-1.5870560442,0.6174390654,0.9376763668   | H,0,-1.8261543452,3.1638580894,-3.1565666545  |
| C,0,-2.9362930713,0.4436498653,0.4670152264   | C,0,3.558097034,1.2682549293,-0.468425981     |

---

|                                               |                                               |
|-----------------------------------------------|-----------------------------------------------|
| H,0,3.556176936,1.3370151689,0.6249617823     | C,0,0.2531374495,-2.192320116,3.3012985723    |
| C,0,4.0969630396,-0.1136027473,-0.8383523527  | H,0,0.106827218,-2.6482416658,4.2850522256    |
| H,0,5.0931922456,-0.2442695421,-0.4138272962  | H,0,-0.0915148722,-2.9273066891,2.5728003187  |
| H,0,3.4642730576,-0.9106886767,-0.4530248805  | C,0,-0.627157979,-0.9369826104,3.2135608091   |
| H,0,4.1872820022,-0.2258516793,-1.9224004468  | H,0,-1.6074055949,-1.146326717,3.654656693    |
| C,0,4.4939508402,2.3637198792,-1.0099342063   | H,0,-0.1874113667,-0.134366526,3.8168343194   |
| H,0,4.1760351285,3.3634802891,-0.7117696793   | C,0,-0.838865927,-0.4040331889,1.845705986    |
| H,0,5.5096215018,2.2089764964,-0.6406303381   | C,0,-1.5361220357,0.355744089,1.0547633045    |
| H,0,4.5224004366,2.3331701917,-2.1019204565   | C,0,-2.6310968037,1.2853214349,0.9042145507   |
| Ru,0,0.0563232744,-0.4559114108,0.099318766   | C,0,-2.5386043225,2.5944426635,1.3951140962   |
| C,0,0.305798573,-4.4564425825,-1.223833598    | C,0,-3.788866029,0.9054519084,0.212543968     |
| C,0,-0.7227411387,-4.608496572,-2.1479628612  | C,0,-3.5769717623,3.4949730856,1.1970750813   |
| C,0,-1.583960008,-3.5456124834,-2.4181603819  | H,0,-1.6438281411,2.8996310209,1.9218714642   |
| C,0,-1.4174997845,-2.3212189966,-1.7751755998 | C,0,-4.8300593697,1.8045948855,0.033673663    |
| C,0,-0.3776002814,-2.1555592602,-0.8596022497 | H,0,-3.8584299382,-0.0998876822,-0.1829890454 |
| C,0,0.4726621723,-3.2366557235,-0.5822041118  | C,0,-4.7275898046,3.1054929347,0.5181722661   |
| H,0,0.9770659298,-5.2701326551,-0.9777707309  | H,0,-3.4884964102,4.5051216957,1.5775352371   |
| H,0,-0.8618369667,-5.5562649381,-2.6527971106 | H,0,-5.7217922485,1.4922236217,-0.4953756632  |
| H,0,-2.3900805209,-3.6726264868,-3.1310005436 | H,0,-5.5361208648,3.8090438499,0.3675171914   |
| H,0,-2.098829691,-1.504585291,-1.9840149475   |                                               |
| C,0,1.5108892057,-3.0276061329,0.4734700048   | <sup>1</sup> D                                |
| O,0,2.2000587335,-3.91420796,0.9626306163     | C,0,-2.0656098735,1.9138508862,-1.2541757458  |
| N,0,1.506835087,-1.7037025699,0.813794373     | C,0,-2.9999065641,1.2451041563,-0.4299668912  |
| O,0,2.2039048584,-1.3205765182,1.9603357459   | C,0,-3.1210986521,-0.1539676835,-0.5254976702 |
| C,0,1.7591024856,-1.9859555713,3.1647718572   | C,0,-2.3897555666,-0.829822495,-1.5561958055  |
| H,0,2.1288037986,-1.3326175032,3.9584278619   | C,0,-1.5737183406,-0.1091011882,-2.4696386404 |
| H,0,2.2565412808,-2.9551935259,3.2329864938   | C,0,-1.3932311849,1.2820302846,-2.340345674   |



---

|                                               |                                              |
|-----------------------------------------------|----------------------------------------------|
| H,0,-1.8589027696,2.960008901,-1.061454729    | H,0,1.199574848,4.6919706106,-0.0021033818   |
| H,0,-3.4958485268,1.7892842657,0.3585583553   | H,0,2.1260285421,2.6774270794,-1.0840063879  |
| H,0,-2.464864922,-1.9057110506,-1.6370756843  | C,0,0.1907525098,-0.1834444847,2.1326949665  |
| H,0,-1.0274649385,-0.6495693348,-3.2325039483 | O,0,0.7871587466,-0.5326570955,3.1413036677  |
| C,0,-0.4973386537,2.0581872661,-3.2605762765  | N,0,-0.7205495393,-0.8082733473,1.379605811  |
| H,0,-0.0152718183,2.8791787441,-2.7292760892  | O,0,-1.0506222921,-2.1534831948,1.5466421606 |
| H,0,0.282270719,1.4206138638,-3.6779513995    | C,0,0.0406875498,-3.1022138606,1.5868811173  |
| H,0,-1.0685508115,2.484345067,-4.0899861639   | H,0,-0.4704229702,-4.0360026656,1.341965072  |
| C,0,-3.9743850182,-0.9793605295,0.4129760092  | H,0,0.4132429086,-3.1594935645,2.6124192903  |
| H,0,-3.4443423754,-1.926482833,0.5431319803   | C,0,1.2357665893,-2.8893444004,0.6520815493  |
| C,0,-4.1399673183,-0.3609684949,1.8006940628  | H,0,1.7023711077,-3.8743908843,0.5497948662  |
| H,0,-4.6533254453,-1.0646529513,2.4575857301  | H,0,1.9701916121,-2.253347483,1.1452640249   |
| H,0,-3.1689011786,-0.1330673273,2.2393745551  | C,0,0.9703066335,-2.3069533018,-0.7598111509 |
| H,0,-4.7403462758,0.5517019802,1.7694842055   | H,0,1.8071154232,-2.5886589738,-1.4034102464 |
| C,0,-5.3340762747,-1.2645684806,-0.2440499421 | H,0,0.0715054351,-2.7526091934,-1.1915470995 |
| H,0,-5.2174166152,-1.7490454333,-1.2153840948 | C,0,0.8439956394,-0.8149185828,-0.6471663065 |
| H,0,-5.9311932007,-1.9200909177,0.3925671608  | C,0,1.809977549,0.0560734062,-0.3189448757   |
| H,0,-5.8936360013,-0.3381201841,-0.3947064272 | C,0,3.2741283288,-0.1155318391,-0.295679904  |
| Ru,0,-0.9014010596,0.2127810619,-0.3861019685 | C,0,3.9541439225,-0.7443220262,-1.3455163244 |
| C,0,-0.1153293533,2.3437232982,2.0534303446   | C,0,4.024230999,0.35738553,0.7890933737      |
| C,0,0.1583621865,3.5861275721,1.5333077203    | C,0,5.3315418714,-0.9159075563,-1.3033471957 |
| C,0,0.9652019565,3.7087589947,0.3871752677    | H,0,3.393930953,-1.0808040762,-2.2085729215  |
| C,0,1.4753044997,2.5884176854,-0.2232963211   | C,0,5.4015489646,0.187967266,0.8299861351    |
| C,0,1.191624531,1.2902971964,0.2664696548     | H,0,3.5153338329,0.8378617084,1.6155013821   |
| C,0,0.383636805,1.173285259,1.4391382398      | C,0,6.0623619433,-0.4517727062,-0.2141925812 |
| H,0,-0.6981620548,2.2410354012,2.9598758346   | H,0,5.8378681674,-1.4031371724,-2.1278072667 |
| H,0,-0.2280703703,4.4740278269,2.0178069797   | H,0,5.9605084758,0.550996233,1.6836997865    |

---

|                                               |                                               |
|-----------------------------------------------|-----------------------------------------------|
| H,0,7.1367011234,-0.58201632,-0.1821820247    | Ru,0,0.9857351077,-0.0566140708,-0.1128171522 |
|                                               | C,0,-0.458577019,-1.8906953271,2.9418088144   |
| <sup>3</sup> D                                | C,0,-0.8368203416,-3.2112409433,2.7529893712  |
| C,0,2.3765121468,-1.9182907167,-0.5282158168  | C,0,-1.5812391262,-3.5641410207,1.6289768556  |
| C,0,3.2710570625,-0.902992373,-0.1641396163   | C,0,-1.9318624603,-2.5968758139,0.6992136078  |
| C,0,3.3062152314,0.3471461057,-0.8356837181   | C,0,-1.5153769524,-1.2700878779,0.8421583262  |
| C,0,2.4515460128,0.5186643013,-1.9376641871   | C,0,-0.7726685243,-0.9161716603,1.9927088269  |
| C,0,1.5494247197,-0.5075307655,-2.3024920477  | H,0,0.0786171281,-1.5977262083,3.8350388304   |
| C,0,1.4835853963,-1.7407899123,-1.619065976   | H,0,-0.5726439332,-3.9604593604,3.4887229683  |
| H,0,2.3591011718,-2.8456817103,0.0282036229   | H,0,-1.8978508143,-4.590143384,1.4873944496   |
| H,0,3.898775682,-1.054121125,0.7032839789     | H,0,-2.5327959462,-2.8618225765,-0.1619495639 |
| H,0,2.4691822075,1.4430219388,-2.4984802927   | C,0,-0.4449620959,0.5323366086,2.3097795757   |
| H,0,0.8553477866,-0.327131197,-3.1138250109   | O,0,-1.0295724525,1.1318775064,3.1923199734   |
| C,0,0.5447008716,-2.8311604946,-2.0476648364  | N,0,0.5422875201,1.0230965467,1.4894375223    |
| H,0,0.2248458514,-3.4260948649,-1.1924414955  | O,0,0.7541658615,2.4060932462,1.6435454928    |
| H,0,-0.3465117623,-2.4121933769,-2.5153335389 | C,0,0.5394674172,3.1271570786,0.421587768     |
| H,0,1.0272010246,-3.4969454523,-2.7687216323  | H,0,1.3144160868,2.861141507,-0.3071780449    |
| C,0,4.2695434507,1.4402941678,-0.4226984159   | H,0,0.7067550783,4.1580038841,0.7361983422    |
| H,0,3.9552598037,2.3480965416,-0.9463816855   | C,0,-0.8559422146,2.9896031838,-0.2057448891  |
| C,0,4.2322650903,1.7358798566,1.0810986633    | H,0,-1.0901034441,3.9482479038,-0.6788284731  |
| H,0,4.8762224906,2.5877192509,1.3077184758    | H,0,-1.5818228025,2.8502527537,0.5985702447   |
| H,0,3.2218292063,1.9660800324,1.4186276772    | C,0,-1.0553760173,1.8858233152,-1.2797387697  |
| H,0,4.6005679437,0.8883784248,1.6632322129    | H,0,-2.0527886859,2.0222544082,-1.7061073632  |
| C,0,5.6928436465,1.0952385964,-0.8884478736   | H,0,-0.3363211141,2.0476153057,-2.0887056399  |
| H,0,5.7313614279,0.9301368781,-1.9667091912   | C,0,-0.8905284817,0.5192333957,-0.6776463483  |
| H,0,6.3819426651,1.9050124974,-0.6407547546   | C,0,-1.8861060225,-0.2287855324,-0.1631601381 |
| H,0,6.0504372943,0.1877994346,-0.3960235895   | C,0,-3.3355870227,-0.011773893,-0.3947839774  |

---

|                                               |                                               |
|-----------------------------------------------|-----------------------------------------------|
| C,0,-3.8590685794,0.0828734135,-1.6885350731  | H,0,-3.9838706374,0.7133515144,-1.3484441792  |
| C,0,-4.2185292338,0.0888108562,0.6876457243   | C,0,-4.3192708855,-0.8177159228,0.0954062994  |
| C,0,-5.2174896823,0.2882688254,-1.8966577778  | H,0,-5.176492127,-1.2079253113,-0.4565977102  |
| H,0,-3.1896984686,-0.0212642553,-2.5334683004 | H,0,-3.4513091846,-1.4231559028,-0.1601578729 |
| C,0,-5.575204194,0.2977102535,0.4804138838    | H,0,-4.5375205608,-0.9465309469,1.1579322193  |
| H,0,-3.8296462104,0.0200811902,1.6961496369   | C,0,-5.3225724513,1.5015642369,0.1324271746   |
| C,0,-6.081080073,0.3992142412,-0.8122848201   | H,0,-5.1991885103,2.5433851628,-0.1690212136  |
| H,0,-5.6032066262,0.3537352394,-2.9067419758  | H,0,-6.2284383531,1.1135118766,-0.3385818101  |
| H,0,-6.2398666445,0.3845094316,1.3310822874   | H,0,-5.4707270448,1.4810218448,1.2150741987   |
| H,0,-7.1400964378,0.5577907913,-0.972470147   | Ru,0,-0.6817287139,0.6004182333,0.182853791   |
|                                               | C,0,0.8760990922,-3.3885665599,1.887405746    |
| <sup>1</sup> E                                | C,0,1.770237,-3.2151341276,2.9292358015       |
| C,0,-1.2584946053,1.4873882214,2.2240982859   | C,0,2.5113568327,-2.0328263915,2.9846236944   |
| C,0,-2.394228111,0.9048944143,1.6469765365    | C,0,2.3860046852,-1.0613024944,2.0068968067   |
| C,0,-2.8481994292,1.2608494613,0.3394492506   | C,0,1.5043808371,-1.2217233212,0.921693076    |
| C,0,-2.1162710624,2.2275057431,-0.3823839438  | C,0,0.7336157353,-2.408337157,0.9052973845    |
| C,0,-0.9303341069,2.7807675662,0.1676378804   | H,0,0.2556896324,-4.2726120282,1.819736102    |
| C,0,-0.4710193827,2.3912166263,1.4572230132   | H,0,1.8811896886,-3.9729446706,3.69298351     |
| H,0,-0.9305175821,1.1839102547,3.2084608175   | H,0,3.1989019276,-1.8682368457,3.8059155904   |
| H,0,-2.920098218,0.1378440168,2.1972515288    | H,0,2.9723975402,-0.1560189877,2.0791528739   |
| H,0,-2.4483014383,2.527549686,-1.3680690356   | C,0,-0.3265167753,-2.5780678852,-0.0918819078 |
| H,0,-0.3612890882,3.5054726366,-0.3997715189  | O,0,-0.9647312984,-3.5795080476,-0.3020952044 |
| C,0,0.7914671347,2.9676084952,2.0336859592    | N,0,-0.6387402199,-1.3523378921,-0.8024002332 |
| H,0,1.2913809346,2.2393432648,2.6729544774    | O,0,-1.6039671233,-1.5255736723,-1.8106893881 |
| H,0,1.4893625558,3.2625795403,1.2518843432    | C,0,-1.0567917858,-2.1961305077,-2.9783093989 |
| H,0,0.5625835863,3.8497622063,2.6384706245    | H,0,-1.7201646562,-1.8638037329,-3.7775958404 |
| C,0,-4.1015219952,0.654788546,-0.2622412255   | H,0,-1.1538914808,-3.2744217504,-2.8477056834 |

---

|                                               |                                                |
|-----------------------------------------------|------------------------------------------------|
| C,0,0.3878312037,-1.7707628427,-3.2419745809  | H,0,-1.0486576717,-2.9465336364,-2.8435456823  |
| H,0,0.5898065259,-1.8203009395,-4.3132947201  | H,0,-2.3692503794,-0.866631684,-2.7303269908   |
| H,0,1.0814901804,-2.4614908148,-2.7555261126  | H,0,-2.5268181268,-1.2050867901,1.5576124856   |
| C,0,0.6228160273,-0.3561870998,-2.6953231505  | H,0,-1.2144430105,-3.3108471351,1.4492553167   |
| H,0,1.6394793925,-0.0222873304,-2.8951856979  | C,0,-0.2458718364,-4.582917031,-0.7883607791   |
| H,0,-0.0577786922,0.3467797321,-3.179628483   | H,0,0.4088926858,-4.5926869006,-1.6603583205   |
| C,0,0.3799334175,-0.3854521993,-1.2001360055  | H,0,0.3687265964,-4.7231858138,0.10166332      |
| C,0,1.3538255432,-0.20297187,-0.1256435566    | H,0,-0.9204316765,-5.4407099111,-0.8678913625  |
| C,0,2.5428398646,0.6305382578,-0.4957917335   | C,0,-3.4424529676,0.372600184,-0.4485341583    |
| C,0,2.4039863933,1.9245263542,-1.0088485141   | H,0,-3.1311762555,0.8745890777,0.4710229139    |
| C,0,3.837654598,0.0933102332,-0.4604573016    | C,0,-3.2542249755,1.3604515941,-1.6004713642   |
| C,0,3.5011383902,2.65984438,-1.4400711874     | H,0,-3.7334135537,2.3086909952,-1.35639313     |
| H,0,1.4134268238,2.3473599242,-1.0798868136   | H,0,-2.1991867366,1.5595700036,-1.78652435     |
| C,0,4.9386803898,0.8267728726,-0.8833682277   | H,0,-3.7022011066,0.9886457547,-2.5257320088   |
| H,0,3.9852802851,-0.9174507929,-0.1048778502  | C,0,-4.9230052703,-0.0094965369,-0.2915195893  |
| C,0,4.7795264812,2.1194222421,-1.3710002073   | H,0,-5.0746928296,-0.669719573,0.5643130935    |
| H,0,3.3546913015,3.6605089158,-1.8286079477   | H,0,-5.5332063405,0.8841512513,-0.1447981773   |
| H,0,5.9247939014,0.3804788454,-0.8406035679   | H,0,-5.2851133294,-0.5261851732,-1.1842100222  |
| H,0,5.6375876183,2.6922757397,-1.6990801617   | Ru,0,-0.2925775227,-1.1287125148,-0.4911440672 |
|                                               | C,0,0.0541692089,3.4643685521,-1.5284497712    |
| <sup>3</sup> E                                | C,0,0.8454810009,3.5310571181,-2.6601430063    |
| C,0,-1.3958305206,-2.5932779562,-1.8810255882 | C,0,1.7969954243,2.5330916867,-2.8923336792    |
| C,0,-2.1450873586,-1.3936527904,-1.8145211853 | C,0,1.945417311,1.4846453634,-2.0059830425     |
| C,0,-2.5931824944,-0.8765275903,-0.5722150487 | C,0,1.1399316492,1.3876955939,-0.855209534     |
| C,0,-2.2442448382,-1.6065637349,0.5931247079  | C,0,0.1926569335,2.4091788286,-0.6242328302    |
| C,0,-1.4745853521,-2.792284747,0.5358670718   | H,0,-0.6889540683,4.2200194475,-1.312317908    |
| C,0,-1.0262774477,-3.3012849709,-0.7099373169 | H,0,0.7320484314,4.3503580317,-3.3580562288    |

---

|                                              |                                              |
|----------------------------------------------|----------------------------------------------|
| H,0,2.4230275651,2.5783806727,-3.7750886755  | H,0,6.2788642739,-1.6392452492,0.8628617021  |
| H,0,2.683617332,0.7167279655,-2.1940243964   |                                              |
| C,0,-0.6931006193,2.3988813007,0.5631278508  | <sup>1</sup> F                               |
| O,0,-1.5114136935,3.2684705838,0.8189970695  | C,0,3.3337341629,1.4036133342,1.0386044767   |
| N,0,-0.5199404907,1.2908566982,1.3557812102  | C,0,2.9968169904,1.1858222908,-0.3179431811  |
| O,0,-1.3898433953,1.1270944556,2.4240000012  | C,0,3.0634086272,-0.1042452868,-0.8741460334 |
| C,0,-0.6612623454,1.3077953326,3.6594287368  | C,0,3.556131949,-1.1522676178,-0.0362712827  |
| H,0,-1.313180053,0.8547905469,4.4069740226   | C,0,4.0419938365,-0.9111832259,1.2766422574  |
| H,0,-0.5659087507,2.3762602202,3.8667264041  | C,0,3.8973961701,0.3657978806,1.8510748323   |
| C,0,0.6999236331,0.6009843163,3.5821992745   | H,0,3.1032276839,2.3637708842,1.4762497675   |
| H,0,0.9509138672,0.1649852128,4.5505876302   | H,0,2.5096261308,1.9877399494,-0.8483359089  |
| H,0,1.4882143331,1.3149141031,3.3352617177   | H,0,3.5468469794,-2.1677476442,-0.4135242289 |
| C,0,0.6414579454,-0.4807576561,2.4939251409  | H,0,4.364314688,-1.7431781634,1.8881486462   |
| H,0,1.5753691363,-1.034260865,2.431116429    | C,0,4.2393463531,0.6234699583,3.2870840566   |
| H,0,-0.1455298288,-1.1948489814,2.7399742263 | H,0,3.5722257856,1.3728341983,3.7125295377   |
| C,0,0.3480490246,0.1797595791,1.1550771286   | H,0,4.1562503053,-0.2868691494,3.8791109449  |
| C,0,1.2945514574,0.2701132596,0.0877782989   | H,0,5.2637505217,0.9979804218,3.3655279629   |
| C,0,2.6733926155,-0.3031247333,0.2625024827  | C,0,2.6074229154,-0.4249008797,-2.2824517095 |
| C,0,2.975460842,-1.6534909902,0.0858888992   | H,0,2.2848416848,-1.471296627,-2.2738652967  |
| C,0,3.704424385,0.55863489,0.6540561916      | C,0,1.4253082223,0.4194445688,-2.7631322728  |
| C,0,4.2634226092,-2.133899289,0.3037135297   | H,0,1.0957724181,0.0678085468,-3.7422010914  |
| H,0,2.1868385424,-2.3297163316,-0.2245619419 | H,0,0.5846973419,0.3576800638,-2.0734960146  |
| C,0,4.9910334165,0.0840937489,0.8691315203   | H,0,1.6982511243,1.470747717,-2.8716714661   |
| H,0,3.4897063113,1.6120592807,0.785593048    | C,0,3.8030639408,-0.307601392,-3.2414178277  |
| C,0,5.2756739536,-1.2675656699,0.6963365874  | H,0,4.6343658119,-0.9412293374,-2.9262370034 |
| H,0,4.4740786703,-3.1864443349,0.1600878648  | H,0,3.5126265058,-0.6036538629,-4.2511839556 |
| H,0,5.7727266907,0.7691199415,1.1734442795   | H,0,4.1614813947,0.7235991672,-3.2809401406  |

---

|                                               |                                               |
|-----------------------------------------------|-----------------------------------------------|
| Ru,0,1.9490049112,-0.2385966935,1.0505323811  | C,0,-4.1183088071,-1.624603587,0.3163862215   |
| C,0,-1.7720988848,3.5802236648,-0.2810641057  | C,0,-3.3240566907,-1.6613249605,-1.9468442491 |
| C,0,-2.9831823198,4.0155963193,-0.7784116934  | C,0,-5.0779671239,-2.5791971441,-0.002485469  |
| C,0,-3.9648654972,3.0785205711,-1.1286937123  | H,0,-4.0587526154,-1.2297273798,1.3230482704  |
| C,0,-3.729925967,1.7278184422,-0.982127122    | C,0,-4.2813336972,-2.6163319413,-2.2700921426 |
| C,0,-2.4965592508,1.2620653754,-0.4785836308  | H,0,-2.6409833549,-1.2978320464,-2.704945429  |
| C,0,-1.5148808855,2.2116362344,-0.1259242238  | C,0,-5.1605537751,-3.0800085014,-1.2970896266 |
| H,0,-0.9942639643,4.2760029873,0.0024801616   | H,0,-5.7616554375,-2.931229,0.7601841098      |
| H,0,-3.1770076225,5.0743602416,-0.894976485   | H,0,-4.3416367222,-2.9979401604,-3.2819629122 |
| H,0,-4.9182170111,3.4168542487,-1.5165467667  | H,0,-5.9066205698,-3.8239001409,-1.5469386193 |
| H,0,-4.4950069722,1.012638493,-1.25250656     |                                               |
| C,0,-0.2095498759,1.7835543371,0.3978014946   | <sup>3</sup> F                                |
| O,0,0.6591684975,2.6064995134,0.7149607201    | C,0,-3.8085308839,1.0075101317,-0.6834317922  |
| N,0,0.0105385025,0.4244119516,0.5054069068    | C,0,-3.0282174001,1.4215037959,0.4121682979   |
| O,0,1.2617699147,-1.1949676112,2.5861060518   | C,0,-2.797089929,0.5727472793,1.5250496632    |
| C,0,-0.1039830774,-1.3866517544,2.8744524237  | C,0,-3.2983556039,-0.7340791531,1.4477939303  |
| H,0,-0.642504489,-0.431672802,2.8728497091    | C,0,-3.9667621185,-1.188067926,0.2810035228   |
| H,0,-0.1734087046,-1.7985627045,3.8881762918  | C,0,-4.2894262348,-0.3118850923,-0.7832684759 |
| C,0,-0.7721667839,-2.3518347908,1.8932262777  | H,0,-3.946832261,1.6889224328,-1.5118970586   |
| H,0,-1.8370218419,-2.411513093,2.1346719062   | H,0,-2.6026383696,2.4133272813,0.3950955367   |
| H,0,-0.3508761334,-3.3529063102,2.0224910891  | H,0,-3.1125144329,-1.4276648498,2.257826637   |
| C,0,-0.6047663534,-1.931066058,0.4248380644   | H,0,-4.2622651849,-2.2269643276,0.2128006447  |
| H,0,0.438809415,-2.085649358,0.1245810894     | C,0,-5.1078069238,-0.776368671,-1.9518050616  |
| H,0,-1.2028223442,-2.5860873215,-0.206670931  | H,0,-4.8910612166,-0.1841179175,-2.8403794293 |
| C,0,-0.9689789048,-0.4896932492,0.1790833413  | H,0,-4.9003999426,-1.822347294,-2.1768017005  |
| C,0,-2.1970472511,-0.1331724027,-0.3057136187 | H,0,-6.1752089704,-0.6824318415,-1.7326363575 |
| C,0,-3.2225188798,-1.1580657021,-0.6477193539 | C,0,-2.064234418,1.0597195933,2.7567883724    |

---

|                                                |                                              |
|------------------------------------------------|----------------------------------------------|
| H,0,-1.8188879776,0.1729311852,3.3488114635    | C,0,0.6821573978,-2.985539001,-0.1671109821  |
| C,0,-0.7521399808,1.7825996935,2.4339939086    | H,0,1.6537388544,-3.3335272997,-0.5321725295 |
| H,0,-0.2393419175,2.0478147853,3.3602321289    | H,0,0.2526995872,-3.7984341596,0.4252914879  |
| H,0,-0.0902770555,1.1579761664,1.8367863406    | C,0,0.8976340391,-1.7687021323,0.7565747332  |
| H,0,-0.9265104685,2.7069686032,1.8805822875    | H,0,-0.0009850544,-1.61915303,1.3597463323   |
| C,0,-2.9951316668,1.947734678,3.5982928275     | H,0,1.715801294,-1.9840619351,1.4423361186   |
| H,0,-3.91421154,1.4229227822,3.8650975753      | C,0,1.1668602152,-0.4935274589,0.0068753537  |
| H,0,-2.4965478511,2.2551219591,4.5195222646    | C,0,2.4111142152,0.0669216638,-0.1397911717  |
| H,0,-3.26947225,2.8496813555,3.0464864195      | C,0,3.614736781,-0.5665235816,0.4656107794   |
| Ru,0,-1.9502955664,-0.4828076075,-0.5094248858 | C,0,4.2446245503,-1.6461026053,-0.1573383914 |
| C,0,1.476247093,3.0147275647,-2.2708302619     | C,0,4.1468505579,-0.0909112478,1.6666477009  |
| C,0,2.6913580364,3.6404003579,-2.4425077542    | C,0,5.3651219083,-2.243880763,0.4093135467   |
| C,0,3.8422117485,3.089865276,-1.8557914345     | H,0,3.8494720291,-2.0142366447,-1.0959656189 |
| C,0,3.7709366928,1.9356739881,-1.107352184     | C,0,5.268065659,-0.6840729224,2.2354255602   |
| C,0,2.5365280552,1.2772853716,-0.9061392426    | H,0,3.6702300276,0.7499331398,2.1556391573   |
| C,0,1.3836622654,1.8403206364,-1.5093452897    | C,0,5.8799284978,-1.764838785,1.6087668625   |
| H,0,0.5700867574,3.40431222,-2.7155304569      | H,0,5.8373402231,-3.0822619212,-0.0878702213 |
| H,0,2.7628047384,4.5470421449,-3.0297201649    | H,0,5.6630867098,-0.3039851095,3.1695603314  |
| H,0,4.8000557912,3.5762823121,-1.9960160128    | H,0,6.752476137,-2.2288789927,2.0512136452   |
| H,0,4.6683950247,1.5216168348,-0.6682105404    |                                              |
| C,0,0.1055584977,1.1777864502,-1.335275544     | <sup>1</sup> G                               |
| O,0,-0.979594401,1.5619866706,-1.8474469843    | C,0,-2.5915773932,-1.1598683285,1.6442352334 |
| N,0,0.0614616207,0.0727191156,-0.5589943467    | C,0,-2.9565564496,-1.0162355788,0.2731045131 |
| O,0,-1.5000102944,-2.2776352436,-1.0873475049  | C,0,-3.2606540229,0.2558305534,-0.2718519858 |
| C,0,-0.2025800281,-2.7330359633,-1.3919247476  | C,0,-3.0855027924,1.3844493211,0.5559707551  |
| H,0,0.3033521489,-2.0338158935,-2.0689646181   | C,0,-2.6217251496,1.2446002576,1.8593065431  |
| H,0,-0.3119532119,-3.6803550985,-1.9350806668  | C,0,-2.4127635815,-0.0316005479,2.4433823309 |

---

|                                               |                                              |
|-----------------------------------------------|----------------------------------------------|
| H,0,-2.4301675304,-2.1500210415,2.0461895839  | H,0,-0.1260102662,-2.9809771537,1.5725754154 |
| H,0,-3.0729948182,-1.908434575,-0.3232701006  | C,0,0.2517136997,-0.4554559308,-2.1667037627 |
| H,0,-3.2102750049,2.3796467515,0.1548009938   | O,0,0.7315255701,-0.0586522395,-3.2112546839 |
| H,0,-2.4053634749,2.1309578217,2.437344302    | N,0,-0.5372336644,0.3915820053,-1.3495572428 |
| C,0,-1.9443675353,-0.133929824,3.8633123927   | O,0,-1.3057837679,3.8962202927,0.592661658   |
| H,0,-1.5637856042,-1.1285182085,4.0900645798  | C,0,-0.604246575,4.5923178446,-0.4354574643  |
| H,0,-1.1584980082,0.5970351464,4.0544655405   | H,0,-0.2555516305,5.5660019521,-0.0615425436 |
| H,0,-2.769828921,0.0835339523,4.5462575414    | H,0,-1.3376780815,4.7908123882,-1.2205047536 |
| C,0,-3.7143406776,0.454046359,-1.7028438249   | C,0,0.5627633164,3.7961480746,-1.0057113358  |
| H,0,-3.0776671147,1.2475291855,-2.1049287876  | H,0,0.8563447159,4.210006542,-1.9733952808   |
| C,0,-3.5444664125,-0.7749471144,-2.5939257944 | H,0,0.2271489917,2.7750135077,-1.1902573999  |
| H,0,-3.7893390445,-0.5156053045,-3.6242318499 | C,0,2.6474590279,2.6337410806,-0.2388535896  |
| H,0,-2.5196205279,-1.1445824389,-2.5798860814 | C,0,3.2975215031,1.6270096346,-0.363226053   |
| H,0,-4.2127980845,-1.5863390783,-2.2942344894 | C,0,4.0409469077,0.4181827763,-0.4874339924  |
| C,0,-5.1724802093,0.9447374377,-1.7165795057  | C,0,3.7796094044,-0.4739400946,-1.5374279351 |
| H,0,-5.3016091723,1.853918916,-1.1280443959   | C,0,5.0306247318,0.0882263989,0.4510005264   |
| H,0,-5.4833795586,1.1588440235,-2.7402773798  | C,0,4.4829188674,-1.6655790709,-1.6321798443 |
| H,0,-5.8423842932,0.1818503269,-1.3125008937  | H,0,3.0228850341,-0.2255598176,-2.2687582605 |
| Ru,0,-0.925984648,-0.0777369156,0.3443033314  | C,0,5.7312581636,-1.1046735864,0.3459793163  |
| C,0,1.0705083843,-2.8678307309,-2.1249601119  | H,0,5.2438056099,0.7783184942,1.2571571921   |
| C,0,1.2486809947,-4.0150059238,-1.3670597775  | C,0,5.4580799627,-1.988061777,-0.693923452   |
| C,0,0.8064264317,-4.0441750886,-0.0428781329  | H,0,4.2626730762,-2.3492055928,-2.4420152288 |
| C,0,0.1704380315,-2.9449641036,0.5318280328   | H,0,6.4921952037,-1.3458057813,1.0779173182  |
| C,0,0.4253406155,-1.7779561299,-1.5486997346  | H,0,6.0026541267,-2.9205956663,-0.7725688719 |
| H,0,1.4321556255,-2.7940176524,-3.1434023714  | C,0,0.9299609038,1.1138662077,2.2486773214   |
| H,0,1.7440758898,-4.8796730095,-1.7898058552  | C,0,2.2119229823,0.9885016469,3.0355406071   |
| H,0,0.9694653598,-4.9342983889,0.5537374936   | H,0,2.9722568608,0.5050504631,2.4251835811   |



---

|                                               |                                               |
|-----------------------------------------------|-----------------------------------------------|
| H,0,2.5468652654,1.9695267906,3.3624813995    | C,0,-3.2697655094,3.3430528022,-2.2075484412  |
| H,0,2.0321981718,0.3551179954,3.9073221135    | H,0,-2.8125230283,4.2784057384,-2.5401731943  |
| O,0,0.6111915153,0.0078189809,1.628327104     | H,0,-3.2400550226,2.6375197106,-3.038546259   |
| O,0,0.2612014625,2.1438373004,2.2497760929    | H,0,-4.3188779778,3.5418801023,-1.97351544    |
| C,0,-0.0434182397,-1.8046609173,-0.2354582402 | C,0,-2.5251197259,3.8286588582,0.1482940551   |
| H,0,-0.6852701724,3.3790799952,1.1321709085   | H,0,-2.0345428184,3.4510921825,1.0457797748   |
| C,0,1.7864484591,3.7929460796,-0.0615034321   | H,0,-1.9957716678,4.7257449276,-0.1807025109  |
| H,0,2.3604846989,4.714536998,-0.2014914076    | H,0,-3.5386435271,4.1342089617,0.4217221487   |
| H,0,1.4532591411,3.7986524695,0.9800898056    | Ru,0,0.7142630983,-0.2442695666,0.2378812545  |
|                                               | C,0,-0.6905540359,-3.6835838658,-1.7409226319 |
| <sup>1</sup> H                                | C,0,-0.8211879144,-4.694085867,-0.7974628752  |
| C,0,-3.3514557333,-0.9239245733,-1.0571430908 | C,0,-0.4638269813,-4.4549751664,0.5301084925  |
| C,0,-2.8860893766,0.3356254996,-1.3921560213  | C,0,0.042750014,-3.2183205285,0.9258167104    |
| C,0,-3.1137850965,1.4425387782,-0.5672694705  | C,0,0.1867056969,-2.2147810259,-0.0190714732  |
| C,0,-3.8594821641,1.2363928132,0.5893205689   | C,0,-0.1907939352,-2.4490805891,-1.3363935966 |
| C,0,-4.3389045638,-0.0310499893,0.9197329341  | H,0,-0.9845958633,-3.8238597916,-2.773913191  |
| C,0,-4.0786707417,-1.1356589398,0.1167221414  | H,0,-1.2101708841,-5.6624134826,-1.0857229636 |
| H,0,-3.1274196091,-1.7623775901,-1.7059214324 | H,0,-0.5775626143,-5.2433005081,1.2648512725  |
| H,0,-2.307757398,0.4605247187,-2.2985900321   | H,0,0.3194542982,-3.049860729,1.9585180021    |
| H,0,-4.0640540005,2.0598552415,1.2605754753   | C,0,-0.0984821597,-1.2523979641,-2.1974161269 |
| H,0,-4.9120641778,-0.1579113868,1.8316112721  | O,0,-0.3464206804,-1.2045995379,-3.3854718476 |
| C,0,-4.5277041231,-2.5214988473,0.4966780889  | N,0,0.2588778349,-0.0728511747,-1.4944784288  |
| H,0,-5.144582988,-2.9687688029,-0.2867002649  | O,0,0.5448280955,2.0021829468,0.3760626603    |
| H,0,-3.6665698515,-3.1792541023,0.6430238915  | C,0,1.4946679835,3.0344918681,0.125058896     |
| H,0,-5.10951084,-2.5153249295,1.4194813828    | H,0,1.7556485185,3.5248812173,1.069578437     |
| C,0,-2.5393525614,2.7892239527,-0.973296527   | H,0,1.0342365242,3.7792276387,-0.5306623972   |
| H,0,-1.4998177122,2.5958674375,-1.2587500234  | C,0,2.738682766,2.4624566636,-0.5303373437    |

---

|                                              |                                              |
|----------------------------------------------|----------------------------------------------|
| H,0,3.440121543,3.2781172443,-0.7189116897   | <sup>111</sup>                               |
| H,0,2.4690966913,2.0265186025,-1.4944384525  | C,0,2.5962615194,-2.0527426742,1.0596139663  |
| C,0,3.4242418922,1.3981559871,0.3403573485   | C,0,3.1424704456,-0.7782333256,1.0232627006  |
| H,0,4.400459827,1.1391667108,-0.0810134394   | C,0,4.1110299488,-0.4291965713,0.0795847103  |
| H,0,3.6076448808,1.7981663547,1.343245603    | C,0,4.5147206224,-1.4128437827,-0.820672696  |
| C,0,2.6463255031,0.1485594791,0.456054133    | C,0,3.965157544,-2.6912518049,-0.7837289997  |
| C,0,2.5319945948,-1.1243886135,0.5211526079  | C,0,2.9909158251,-3.0341389511,0.1505863312  |
| C,0,3.2094556545,-2.3922206276,0.6736746062  | H,0,1.838865836,-2.2753045866,1.801068801    |
| C,0,3.1004016223,-3.4081632895,-0.2813113567 | H,0,2.7829176126,-0.0360966353,1.724852941   |
| C,0,4.0166078813,-2.5930883718,1.8008678098  | H,0,5.2581594301,-1.1879522723,-1.5740827204 |
| C,0,3.7954008172,-4.5965783047,-0.1131772445 | H,0,4.2979933682,-3.4315858318,-1.5033780049 |
| H,0,2.4684262915,-3.264763004,-1.1453592145  | C,0,2.3457264828,-4.3940740713,0.1478217301  |
| C,0,4.6971254228,-3.7905912091,1.9683414105  | H,0,2.0953301343,-4.7191356971,1.1593965998  |
| H,0,4.0969408782,-1.8109254189,2.5449112051  | H,0,1.4161816184,-4.3765310099,-0.4287786384 |
| C,0,4.5899143317,-4.7947508949,1.0114115301  | H,0,2.9973654671,-5.1471659146,-0.2978620898 |
| H,0,3.7067668124,-5.3747309101,-0.8601634269 | C,0,4.6923223589,0.9731392558,0.0962998168   |
| H,0,5.3124682966,-3.9390386694,2.8465552784  | H,0,3.8715219413,1.6408065875,0.3787569142   |
| H,0,5.1222894414,-5.7280777997,1.1427309168  | C,0,5.7759126523,1.0892813761,1.180969569    |
| C,0,-2.071055132,0.0403552197,3.5496046316   | H,0,6.1535402848,2.112849894,1.2449689447    |
| H,0,-2.7114198721,-0.7181331117,3.1065220131 | H,0,5.3867983648,0.8055148136,2.1600262761   |
| H,0,-1.4862691867,-0.4271145219,4.3454712461 | H,0,6.6170808978,0.4303948067,0.9511733673   |
| H,0,-2.6610518499,0.8509028155,3.9698320183  | C,0,5.2265115919,1.4439693928,-1.2583857486  |
| C,0,-1.1156511799,0.5789590955,2.5156349987  | H,0,4.4733069032,1.3307315673,-2.0382787881  |
| O,0,-0.80520264,1.7727867079,2.5016720738    | H,0,5.5125324844,2.4965780684,-1.2028900392  |
| O,0,-0.6494920866,-0.3412885042,1.7203457718 | H,0,6.11789605,0.8844079146,-1.5524810205    |
| H,0,0.0447319482,2.1175778737,1.2386222359   | Ru,0,-0.1838056155,0.1599531105,0.0785191707 |
|                                              | C,0,-1.116075531,-2.8940298011,0.7793454386  |

---

|                                               |                                               |
|-----------------------------------------------|-----------------------------------------------|
| C,0,-1.5184921462,-3.6495105406,-0.2896711055 | C,0,-6.52676774,0.1218136283,0.4511366196     |
| C,0,-2.3451473651,-3.0814462089,-1.275075697  | H,0,-4.7941088812,-1.030510781,0.9605292984   |
| C,0,-2.7505593578,-1.7760631757,-1.170950237  | C,0,-6.1206620604,2.1577947193,-0.7642902539  |
| C,0,-2.3393027921,-0.9582112191,-0.0884547861 | H,0,-4.0768703524,2.5870261881,-1.2267010692  |
| C,0,-1.5055181701,-1.5375046202,0.9112877677  | C,0,-7.0104280775,1.2712459844,-0.1666201993  |
| H,0,-0.4978736658,-3.3273747386,1.5543509843  | H,0,-7.2126165431,-0.5713083533,0.9215157471  |
| H,0,-1.2087559503,-4.6832217503,-0.3722898059 | H,0,-6.490867895,3.048111382,-1.2568733528    |
| H,0,-2.6662592876,-3.6795980452,-2.1184978681 | H,0,-8.0739125123,1.4726495556,-0.1849705777  |
| H,0,-3.3975038295,-1.3435122155,-1.922901923  | C,0,1.8925894879,-1.2855072442,-3.4324996068  |
| C,0,-1.0793171915,-0.8081781617,2.193776336   | H,0,2.1999096099,-2.2296127023,-2.9848655343  |
| O,0,-1.6566876232,-0.9220224914,3.2530813318  | H,0,1.0247205746,-1.4816894098,-4.0642535139  |
| N,0,0.0035905169,-0.0105627395,1.8976972548   | H,0,2.7015532296,-0.8693804497,-4.0269502797  |
| O,0,1.1961826507,1.7444490346,-0.0626985594   | C,0,1.5007128299,-0.3301901105,-2.3353691334  |
| C,0,0.8146898433,3.1313572213,-0.0063908197   | O,0,2.0235686539,0.7898996502,-2.2522880539   |
| H,0,0.6829554574,3.5036334696,-1.0281535352   | O,0,0.5809875618,-0.7861129727,-1.5432099189  |
| H,0,1.6452581831,3.6725781156,0.4532218291    | H,0,1.639608179,1.5134145961,-0.9467500806    |
| C,0,-0.4541214242,3.3424529822,0.8032493103   |                                               |
| H,0,-0.5608877355,4.4187038333,0.9622969027   | <sup>3</sup> Il                               |
| H,0,-0.33247012,2.8793825702,1.7846694356     | C,0,-2.505963309,1.7203288107,0.8424593929    |
| C,0,-1.728799948,2.8139689454,0.1273084154    | C,0,-2.9965025894,0.4805643413,1.2436165061   |
| H,0,-2.6049560374,3.1537071756,0.6897555314   | C,0,-3.878503339,-0.2503531713,0.435849677    |
| H,0,-1.810319557,3.2657436503,-0.8689839073   | C,0,-4.2607842336,0.3205936837,-0.7724418356  |
| C,0,-1.778949306,1.3237524342,0.0111188978    | C,0,-3.7741940576,1.5645000936,-1.1686976353  |
| C,0,-2.8155709277,0.4643168127,-0.0550694661  | C,0,-2.8789712913,2.2796900779,-0.3828557882  |
| C,0,-4.2552995878,0.7517181353,-0.1164818244  | H,0,-1.8342310404,2.2642847617,1.4939487778   |
| C,0,-5.1650180958,-0.1394907784,0.4706006021  | H,0,-2.7085492881,0.0833568263,2.2095317794   |
| C,0,-4.7564981951,1.9030954471,-0.738163367   | H,0,-4.9336309699,-0.2089991348,-1.4330048031 |

---

|                                               |                                               |
|-----------------------------------------------|-----------------------------------------------|
| H,0,-4.0904086744,1.9746709339,-2.1213939348  | O,0,1.4137070086,0.2926474989,3.8332093707    |
| C,0,-2.2751126804,3.5705268534,-0.8597298118  | N,0,0.0433215653,-0.5842158641,2.1776626312   |
| H,0,-2.0740320088,4.2502653891,-0.0303847756  | O,0,-1.3272542629,-2.1431048303,-0.0011299892 |
| H,0,-1.3214903601,3.37392882,-1.3574768565    | C,0,-0.7320168334,-3.458208836,0.0465255955   |
| H,0,-2.9270713776,4.0793754559,-1.5711563917  | H,0,-0.8266339032,-3.8863698057,-0.9559120758 |
| C,0,-4.3862320638,-1.5943259555,0.9207196593  | H,0,-1.3374338402,-4.0510170673,0.7350861287  |
| H,0,-3.5541352778,-2.0565831821,1.4596843793  | C,0,0.7241936716,-3.4739178351,0.4856007922   |
| C,0,-5.5444281902,-1.4046737,1.9137274044     | H,0,1.0569367357,-4.5143403592,0.4348154792   |
| H,0,-5.869318222,-2.3666449168,2.3170766475   | H,0,0.7998456405,-3.1598716418,1.5278839277   |
| H,0,-5.2503156448,-0.7670975893,2.7490543137  | C,0,1.6432285728,-2.5999650923,-0.3824683438  |
| H,0,-6.3994705962,-0.9367712174,1.4193952957  | H,0,2.6865729092,-2.8699364718,-0.1949171951  |
| C,0,-4.7879242417,-2.5467404182,-0.2075124121 | H,0,1.4478002145,-2.8124638248,-1.4407741427  |
| H,0,-3.9981318175,-2.639328986,-0.9534419082  | C,0,1.4589180938,-1.1443349302,-0.1140814977  |
| H,0,-4.9997430387,-3.5379514365,0.1981348236  | C,0,2.3341143506,-0.1353072636,-0.0348051752  |
| H,0,-5.6929296841,-2.2067224532,-0.7168355426 | C,0,3.7779283829,-0.1572021429,-0.3316015689  |
| Ru,0,-0.303357733,-0.3887089115,0.3837854485  | C,0,4.6610891254,0.6254358424,0.4242974111    |
| C,0,0.808360718,2.6988150111,2.0822459917     | C,0,4.3046744116,-0.9455207528,-1.362422654   |
| C,0,0.9086622374,3.7503746771,1.2004306442    | C,0,6.0251314153,0.6025257055,0.1718604993    |
| C,0,1.3983593664,3.5322850794,-0.0949885577   | H,0,4.2729186375,1.2420195595,1.2251882573    |
| C,0,1.805156279,2.2752034493,-0.4738792787    | C,0,5.6698662187,-0.9648960463,-1.6159728824  |
| C,0,1.7170778424,1.1704279573,0.4060452979    | H,0,3.6353063779,-1.5241341236,-1.9845129635  |
| C,0,1.1861445945,1.3975725153,1.7032596303    | C,0,6.5363623744,-0.1942950281,-0.8480481431  |
| H,0,0.4439531438,2.8495118975,3.0902399638    | H,0,6.6919721482,1.2054754884,0.775343845     |
| H,0,0.6089275591,4.7449554807,1.5056439329    | H,0,6.0568990453,-1.5761941589,-2.4217462387  |
| H,0,1.4678896598,4.356889994,-0.7927707562    | H,0,7.6004586078,-0.2093867923,-1.0465087203  |
| H,0,2.2182401438,2.1082881899,-1.4598316581   | C,0,-1.5351141781,0.2926182687,-3.8274953582  |
| C,0,0.9328003165,0.2869625768,2.7126458596    | H,0,-2.0931547771,1.2164914249,-3.6705928118  |

---

|                                               |                                               |
|-----------------------------------------------|-----------------------------------------------|
| H,0,-0.5566632032,0.5653398253,-4.2247031365  | H,0,6.207823314,-1.6925410109,-0.4457890396   |
| H,0,-2.0633583832,-0.3448360999,-4.5317145857 | C,0,4.123864049,-2.8443771039,1.0362215069    |
| C,0,-1.3620971941,-0.3988111194,-2.4989074032 | H,0,3.2073494833,-2.6868766289,1.6029934695   |
| O,0,-1.8502540683,-1.5441164224,-2.3346325288 | H,0,4.262751859,-3.9170323505,0.8948417942    |
| O,0,-0.7196908741,0.2465641067,-1.6091705892  | H,0,4.9624998284,-2.4871222439,1.6383862554   |
| H,0,-1.6307161213,-1.9481820147,-1.0012424137 | Ru,0,1.6835950048,0.2783092272,0.1137496504   |
|                                               | C,0,-2.211090359,3.4152030801,-0.7872085385   |
| !J1                                           | C,0,-3.4413119341,3.8019065409,-0.2892999692  |
| C,0,2.8580939263,1.3505365313,-1.3964225637   | C,0,-4.3578569052,2.826828321,0.1215649652    |
| C,0,3.2145067282,-0.0278882499,-1.4275191436  | C,0,-4.0423135527,1.485076266,0.0334033819    |
| C,0,3.6551739281,-0.6886760442,-0.2582072666  | C,0,-2.7901217907,1.0745314641,-0.4637687201  |
| C,0,3.7285517352,0.0596312391,0.9549499336    | C,0,-1.8739726822,2.0610496985,-0.8724189781  |
| C,0,3.3399954167,1.4044352348,0.9800049803    | H,0,-1.4777220305,4.14211301,-1.1084739377    |
| C,0,2.9156586233,2.0923270284,-0.2003133871   | H,0,-3.6951366474,4.8518427538,-0.2159046762  |
| H,0,2.4223263679,1.81149312,-2.2688218595     | H,0,-5.322508576,3.1250699644,0.5141176515    |
| H,0,3.1041098982,-0.5859025589,-2.3475312573  | H,0,-4.7570223398,0.7388828174,0.3524694438   |
| H,0,3.9840633038,-0.4311678527,1.8812317169   | C,0,-0.5136914267,1.6794553507,-1.2977531711  |
| H,0,3.2872416052,1.9210394511,1.9297673062    | O,0,0.2590174955,2.5255383452,-1.752859436    |
| C,0,2.4984015514,3.5280263856,-0.1010939489   | N,0,-0.1298856803,0.3624003477,-1.0934399089  |
| H,0,2.042938102,3.8730176045,-1.0229867078    | O,0,0.9083526938,-1.4763520036,1.1101627382   |
| H,0,1.7665360541,3.6446396159,0.6999778495    | C,0,0.5736988518,-2.7518698673,0.5502137694   |
| H,0,3.3699450857,4.1449291302,0.1359445995    | H,0,-0.3763386362,-3.0752654674,0.9851559627  |
| C,0,4.0801824691,-2.143250098,-0.3231757511   | H,0,1.3422106105,-3.4650131091,0.8572701243   |
| H,0,3.3544331221,-2.6628601348,-0.9526551075  | C,0,0.4731892797,-2.6944866182,-0.9581786949  |
| C,0,5.4494901078,-2.2306747598,-1.0193273662  | H,0,0.4838421635,-3.7159662225,-1.3505676271  |
| H,0,5.7651739185,-3.2724180599,-1.1015264205  | H,0,1.3606543524,-2.1995185966,-1.3508614687  |
| H,0,5.4185121447,-1.8029995872,-2.022118144   | C,0,-0.7883264642,-1.9974135783,-1.4526990204 |

|                                               |                                               |
|-----------------------------------------------|-----------------------------------------------|
| H,0,-0.7233992851,-1.9128005769,-2.5439060387 | C,0,-3.0042874858,1.7875705064,-0.6900390672  |
| H,0,-1.6380070078,-2.6461122575,-1.2484329245 | C,0,-3.7647254416,1.7021353914,0.4747376521   |
| C,0,-1.1186440448,-0.6034057463,-0.9559176783 | C,0,-4.1884041272,0.4720003475,0.9671790579   |
| C,0,-2.407059581,-0.3070030507,-0.610634625   | C,0,-3.8682564461,-0.7192396696,0.319207943   |
| C,0,-3.4313922798,-1.3619018257,-0.3767060029 | H,0,-2.8366359814,-1.5429270688,-1.3722647461 |
| C,0,-4.393360846,-1.6747453637,-1.3389412566  | H,0,-2.090088146,0.6203778962,-2.2417435673   |
| C,0,-3.4618615329,-2.0372848652,0.8464029191  | H,0,-4.0283963125,2.5991562765,1.0182642041   |
| C,0,-5.347969703,-2.6562811113,-1.0976544289  | H,0,-4.7788657508,0.4407690024,1.8769034579   |
| H,0,-4.3848650193,-1.1454233638,-2.2840573813 | C,0,-4.2984638425,-2.049031145,0.8794212738   |
| C,0,-4.4177861892,-3.0179899101,1.0902519397  | H,0,-4.1780730171,-2.8473319019,0.147242536   |
| H,0,-2.7355365003,-1.7718122199,1.6053887447  | H,0,-3.6988968818,-2.3211962732,1.7532862587  |
| C,0,-5.3609923218,-3.3332381416,0.1178602096  | H,0,-5.3429089266,-2.0287849846,1.1977185785  |
| H,0,-6.0821205694,-2.8926741123,-1.8581884618 | C,0,-2.5267665237,3.1020048589,-1.2865000654  |
| H,0,-4.4286611305,-3.5329758105,2.0432462855  | H,0,-1.4653989799,2.9649234875,-1.5250660564  |
| H,0,-6.1048776038,-4.0970905801,0.3073403012  | C,0,-3.2589376154,3.3940054494,-2.6075211346  |
| C,0,-1.3815778119,2.0167934882,2.7998883185   | H,0,-2.87072079,4.3042169139,-3.0707684558    |
| H,0,-0.760701212,2.8450145161,3.1387566209    | H,0,-3.1451724598,2.5763100628,-3.3199724118  |
| H,0,-2.0498111947,2.397539205,2.0250907254    | H,0,-4.3274452418,3.5339281599,-2.4254938673  |
| H,0,-1.9759295853,1.6184170042,3.6187099642   | C,0,-2.6401270987,4.3004893221,-0.3431103372  |
| C,0,-0.5264657949,0.93198712,2.192515502      | H,0,-2.1319529393,4.1155645007,0.6028047239   |
| O,0,-0.8029575539,-0.2676276573,2.4177928712  | H,0,-2.1912086989,5.1818432924,-0.8061942621  |
| O,0,0.4377856718,1.3399153796,1.4615507175    | H,0,-3.6852670999,4.5438615977,-0.1355029283  |
| H,0,0.139267708,-1.0800723253,1.6901726689    | Ru,0,0.4874612065,-0.1495673559,-0.0030616641 |
| <sup>1</sup> H2                               | C,0,-0.432003324,-3.9048035498,-1.891264317   |
| C,0,-3.112453581,-0.6358052483,-0.8488544809  | C,0,-1.0085976993,-4.7486446562,-0.9517490796 |
| C,0,-2.6892807517,0.59188792,-1.3403281317    | C,0,-1.169107818,-4.2981505658,0.3550042467   |
|                                               | C,0,-0.7450513875,-3.0243167754,0.7381357678  |

---

|                                               |                                               |
|-----------------------------------------------|-----------------------------------------------|
| C,0,-0.1664146393,-2.1604884133,-0.1859056238 | H,0,3.0058983389,0.8747820109,-1.5261872467   |
| C,0,-0.0314728156,-2.6358080265,-1.4925323784 | C,0,6.2509460338,0.5241389374,-0.5963700508   |
| H,0,-0.2978243651,-4.2034641733,-2.9237485534 | H,0,6.9227284383,-0.4815087481,1.1824430018   |
| H,0,-1.3365826816,-5.741356661,-1.2318601279  | H,0,5.2909548867,1.4479644784,-2.2815166058   |
| H,0,-1.6363282834,-4.9423586761,1.0908073359  | H,0,7.2506154274,0.7799227651,-0.9239997523   |
| H,0,-0.9087612003,-2.7295264994,1.7626118349  | C,0,1.1397306904,4.2962013643,0.3275511506    |
| C,0,0.4985890891,-1.6201484064,-2.4252303987  | H,0,0.5124157058,4.7198692087,-0.4603687477   |
| O,0,0.8598095962,-1.7557850742,-3.57147982    | H,0,1.0572033112,4.9327505646,1.2060665429    |
| N,0,0.4930907408,-0.3893362448,-1.7452122773  | H,0,2.1645163072,4.2589168849,-0.0357290935   |
| O,0,-0.8388749981,0.4178640527,1.5023409889   | C,0,0.6309670417,2.9087672144,0.6294161572    |
| C,0,-1.0888555945,-0.166452103,2.7767753009   | O,0,1.100662839,1.9574784041,-0.0608410736    |
| H,0,-1.6377630216,-1.0932377632,2.6160198328  | O,0,-0.2480215009,2.7802246414,1.5272191918   |
| H,0,-1.7513975375,0.513832042,3.3180470422    | H,0,-0.6557180458,1.4844181018,1.5747931456   |
| C,0,0.1865235448,-0.3929888617,3.5828583922   |                                               |
| H,0,-0.0875459818,-0.7686971444,4.5722603009  | <sup>3</sup> H2                               |
| H,0,0.6797224617,0.5713758683,3.7264165595    | C,0,-2.4122110318,-0.3434836963,-1.9555838676 |
| C,0,1.1829091711,-1.3762514762,2.9342604911   | C,0,-2.0463754772,0.8944572673,-1.4171380193  |
| H,0,2.0920680828,-1.4240018993,3.5416738278   | C,0,-2.7922104265,1.4808398112,-0.3775862462  |
| H,0,0.7668108124,-2.3847459756,2.9184216589   | C,0,-3.8663085256,0.7541435705,0.1257266173   |
| C,0,1.5609525324,-0.9649348462,1.5755366788   | C,0,-4.2084573701,-0.4867673721,-0.4040286906 |
| C,0,2.3607438228,-0.5033661317,0.7008136361   | C,0,-3.4969531635,-1.0582539374,-1.4559570653 |
| C,0,3.6747266304,-0.1366482294,0.2440066859   | H,0,-1.8281352323,-0.7523034901,-2.7695220643 |
| C,0,4.7894731876,-0.5147945177,1.0089782135   | H,0,-1.2567994162,1.4662453698,-1.8895739093  |
| C,0,3.866149306,0.5744287066,-0.9458250817    | H,0,-4.4622779148,1.1575120027,0.933307238    |
| C,0,6.0675471923,-0.1842680489,0.5888973287   | H,0,-5.0521162155,-1.023878851,0.0153466509   |
| H,0,4.6430010616,-1.0752915485,1.9234684359   | C,0,-3.8531801814,-2.417485971,-1.9892605865  |
| C,0,5.150074575,0.8995114325,-1.3591080307    | H,0,-3.4644426653,-3.1961037971,-1.3293830564 |

---

|                                               |                                              |
|-----------------------------------------------|----------------------------------------------|
| H,0,-4.934942396,-2.54777572,-2.0558367206    | C,0,-0.6185712065,0.5299433605,3.1070456548  |
| H,0,-3.4258280884,-2.5820671882,-2.9785622335 | H,0,-1.4520207456,-0.166860116,3.1837801013  |
| C,0,-2.4568793372,2.8864684195,0.0772085057   | H,0,-0.8641327008,1.4023322187,3.720188774   |
| H,0,-1.3693634186,2.9668027852,0.076236554    | C,0,0.6635338694,-0.1124557003,3.6298395915  |
| C,0,-2.9928522095,3.9078764914,-0.9416067217  | H,0,0.4878910038,-0.4311145269,4.6612831786  |
| H,0,-2.7033510723,4.9211998835,-0.6542909503  | H,0,1.456921073,0.63854819,3.6508493995      |
| H,0,-2.6029242645,3.7132766518,-1.9417537873  | C,0,1.1404400887,-1.322999564,2.8043974639   |
| H,0,-4.083658451,3.8662842023,-0.991945523    | H,0,2.0450518105,-1.7401472318,3.2559384106  |
| C,0,-2.9445112461,3.2242353941,1.4858603957   | H,0,0.3864433107,-2.1091230181,2.7947602654  |
| H,0,-2.6161149511,2.4733359963,2.2036531761   | C,0,1.4727415415,-0.896758923,1.4388182039   |
| H,0,-2.5430296467,4.1903051555,1.7959290022   | C,0,2.1856125335,-0.3753237836,0.5624463045  |
| H,0,-4.0341151246,3.2934345823,1.5309776311   | C,0,3.3478100399,0.1717588533,-0.0794223845  |
| Ru,0,0.1314398183,-0.1810428257,-0.0930197881 | C,0,4.2405302392,0.9247194285,0.6960277407   |
| C,0,-0.9499942293,-4.2953875937,-0.4759712568 | C,0,3.6012814116,-0.0143864216,-1.4426478102 |
| C,0,-1.8661443086,-4.591791682,0.5269466516   | C,0,5.3776819452,1.4680319633,0.116571796    |
| C,0,-2.2825760931,-3.5825863249,1.3914405979  | H,0,4.0237186957,1.0921868487,1.7424880721   |
| C,0,-1.7570543359,-2.2920397288,1.2985866379  | C,0,4.7416325529,0.5322773887,-2.0113907332  |
| C,0,-0.8036424202,-1.9903607919,0.3315686349  | H,0,2.8937782295,-0.5714749051,-2.0403984676 |
| C,0,-0.4458524376,-3.0048683675,-0.5640916067 | C,0,5.6310771718,1.2724806518,-1.2375536617  |
| H,0,-0.6370394647,-5.0361663321,-1.2015070249 | H,0,6.0610793417,2.0514216369,0.7202099818   |
| H,0,-2.2734362065,-5.5904606653,0.6199682897  | H,0,4.933506663,0.3848681392,-3.0663537459   |
| H,0,-3.0279788351,-3.798021488,2.1483828264   | H,0,6.5164340807,1.7009817059,-1.6899934262  |
| H,0,-2.1280831897,-1.5322256469,1.9713523059  | C,0,2.1221838092,3.7667565085,-0.6643003194  |
| C,0,0.415248498,-2.5236874368,-1.6819078337   | H,0,1.6902631954,4.0160944026,-1.6327121986  |
| O,0,0.8546880214,-3.1937809308,-2.5994904829  | H,0,2.2296894191,4.655834864,-0.0473646528   |
| N,0,0.5881391544,-1.1571974757,-1.5493729273  | H,0,3.1080918787,3.3320124073,-0.844517913   |
| O,0,-0.5449740763,0.9496079695,1.7450017093   | C,0,1.2776842303,2.72801948,0.0320884315     |



---

|                                               |                                              |
|-----------------------------------------------|----------------------------------------------|
| O,0,0.8332622516,1.7850019449,-0.7029030641   | H,0,-5.1983097408,1.2424888909,-2.6134088254 |
| O,0,1.0688066902,2.8232949051,1.2632492726    | H,0,-3.4442589385,1.1179002904,-2.6464746297 |
| H,0,0.0951125074,1.7540240533,1.6557126718    | Ru,0,0.4247628975,0.9248400864,-0.5696971247 |
|                                               | C,0,1.4798249493,5.0385396086,-1.2094372499  |
| <sup>1</sup> H3                               | C,0,2.8645281387,5.1414611342,-1.1495077036  |
| C,0,-1.2282961115,-1.7777619153,-0.5093378499 | C,0,3.620256863,3.9977496509,-0.9234133152   |
| C,0,-2.199594835,-0.9309985254,-1.0402781004  | C,0,3.0142200039,2.7512785412,-0.7367861112  |
| C,0,-3.3003160149,-0.5281651894,-0.2813282368 | C,0,1.6325855968,2.6377862028,-0.7802846579  |
| C,0,-3.3999927139,-1.0343264965,1.014503822   | C,0,0.8912649969,3.7958558993,-1.0318535611  |
| C,0,-2.4282486565,-1.8698854362,1.5500511213  | H,0,0.8472231691,5.8965390587,-1.4012019451  |
| C,0,-1.3150230454,-2.245013078,0.8034852181   | H,0,3.3505250205,6.0987537215,-1.2866228297  |
| H,0,-0.3912412131,-2.0714868819,-1.1293201037 | H,0,4.7012637417,4.0648248943,-0.8884457042  |
| H,0,-2.0891699129,-0.592903525,-2.0608994057  | H,0,3.6520423998,1.8979397009,-0.5770542945  |
| H,0,-4.2482783251,-0.7534047236,1.6283069612  | C,0,-0.5637905645,3.5401822882,-1.1492049167 |
| H,0,-2.5291543786,-2.216459076,2.5717472884   | O,0,-1.4626379398,4.344125356,-1.2672210111  |
| C,0,-0.2143944843,-3.0840204274,1.3920206482  | N,0,-0.736294635,2.1587008067,-1.0892476487  |
| H,0,0.152677294,-3.822793868,0.6772471455     | O,0,1.4038219313,-0.383084458,-1.6182007968  |
| H,0,0.6355036266,-2.4533846259,1.6722305478   | C,0,2.7855958851,-0.6397363237,-1.594079298  |
| H,0,-0.5437541467,-3.6089065083,2.2892082751  | H,0,3.3609619583,0.253065575,-1.8653012116   |
| C,0,-4.357107845,0.437638483,-0.7924585111    | H,0,2.9840241241,-1.392893285,-2.365663033   |
| H,0,-5.3282984331,0.0162275733,-0.5074717438  | C,0,3.2478498707,-1.1944217811,-0.2426765045 |
| C,0,-4.2244626098,1.8043934255,-0.0978164642  | H,0,4.2924825223,-1.508923708,-0.3139025134  |
| H,0,-5.0396426766,2.466476654,-0.3974910228   | H,0,2.6521266791,-2.0838712023,-0.0244673812 |
| H,0,-4.2534354448,1.701520872,0.9881488266    | C,0,3.1004626323,-0.1952903018,0.9249899448  |
| H,0,-3.2853737221,2.2864509317,-0.3743447134  | H,0,3.2641220974,-0.7106518986,1.8773308823  |
| C,0,-4.355619011,0.6183856604,-2.3111812133   | H,0,3.8685059076,0.5777166716,0.8636936512   |
| H,0,-4.4377280321,-0.3371725524,-2.8329780747 | C,0,1.7673980131,0.4202628561,0.9520660474   |

---

|                                              |                                               |
|----------------------------------------------|-----------------------------------------------|
| C,0,0.6150835244,0.6614131504,1.439002779    | H,0,3.4183461285,3.5234394956,-1.0605704189   |
| C,0,-0.319433467,0.6458708822,2.5389522709   | C,0,2.9298386633,-2.8081732593,-1.3224047811  |
| C,0,-1.5005819149,1.3903825216,2.4862312608  | H,0,3.9977424879,-3.0302400605,-1.4405673957  |
| C,0,-0.0438844546,-0.1259390947,3.6764654705 | C,0,2.4947330838,-3.3581238349,0.0471202993   |
| C,0,-2.3875154857,1.3677487321,3.5521571849  | H,0,2.6995919034,-4.4292850569,0.1066913807   |
| H,0,-1.7210524606,1.9670358204,1.5990622203  | H,0,3.0268913381,-2.8714987458,0.865915596    |
| C,0,-0.9395680403,-0.1539312557,4.7332590604 | H,0,1.4250935584,-3.2131361053,0.2033428038   |
| H,0,0.8680966468,-0.7071570784,3.7182685453  | C,0,2.1804292896,-3.538130257,-2.4375881142   |
| C,0,-2.1138798725,0.5935757662,4.6740552311  | H,0,2.4924246863,-3.2016262994,-3.4283719714  |
| H,0,-3.3000606207,1.9474642149,3.5003801798  | H,0,2.3704367462,-4.610802222,-2.373184084    |
| H,0,-0.7241175834,-0.7582044738,5.6053764164 | H,0,1.1022844884,-3.3896666556,-2.3445682306  |
| H,0,-2.8118035196,0.570419589,5.5013588779   | Ru,0,-0.9625428015,0.0832320318,-0.7109762785 |
|                                              | C,0,-3.6451842144,-2.005910471,1.842802409    |
| <sup>3</sup> H3                              | C,0,-4.8011294362,-1.2319609753,1.9017847214  |
| C,0,1.8762228447,0.769739106,-2.2723721349   | C,0,-4.8810838932,-0.0396941804,1.1867897233  |
| C,0,1.960792104,-0.6218505221,-2.2665549843  | C,0,-3.8076171597,0.4042362719,0.4120863932   |
| C,0,2.8033792623,-1.2925733137,-1.3793940537 | C,0,-2.6567921367,-0.3693992701,0.3501084671  |
| C,0,3.5674727436,-0.5073830715,-0.5133931795 | C,0,-2.5835231657,-1.5665698301,1.0684956196  |
| C,0,3.4761925688,0.8764804158,-0.5089371464  | H,0,-3.5528179069,-2.9406318463,2.3820026147  |
| C,0,2.6222598266,1.5438708223,-1.3850196257  | H,0,-5.6406243285,-1.5559116527,2.5038305394  |
| H,0,1.209549102,1.2517774616,-2.9775529039   | H,0,-5.7846166489,0.556189818,1.2337037738    |
| H,0,1.3550313784,-1.1777154484,-2.9683193188 | H,0,-3.8888235443,1.3350135865,-0.1342690283  |
| H,0,4.2437751295,-0.9893621098,0.1826298348  | C,0,-1.2897230708,-2.3077555872,0.8778075036  |
| H,0,4.0714018513,1.4465519073,0.195266135    | O,0,-0.9602684232,-3.3213331313,1.4661646587  |
| C,0,2.480159105,3.0404787048,-1.337726572    | N,0,-0.5822085741,-1.6542100589,-0.1054508687 |
| H,0,2.1617403025,3.4451509824,-2.2994057274  | O,0,-1.6247247756,0.9419389132,-2.329726312   |
| H,0,1.7335080412,3.3323660427,-0.5922224924  | C,0,-2.1551945643,2.2219956125,-2.5502361452  |

---

|                                               |                                               |
|-----------------------------------------------|-----------------------------------------------|
| H,0,-3.1996151433,2.2503077606,-2.2025523776  | C,0,-1.6909707773,-2.211908899,-2.0435549188  |
| H,0,-2.1700862093,2.4011347216,-3.6313366481  | C,0,-0.5050757456,-1.6809944617,-2.5340891381 |
| C,0,-1.3653803773,3.3455373421,-1.8738104019  | H,0,0.5049338103,0.1730502431,-2.9739741146   |
| H,0,-1.8102762177,4.3068976801,-2.1436000291  | H,0,-1.2816290741,1.6094846033,-2.1274729533  |
| H,0,-0.3430066888,3.3387118403,-2.2570807232  | H,0,-3.6153469348,-1.8466634474,-1.1801758893 |
| C,0,-1.32958432,3.2180582863,-0.337218479     | H,0,-1.8252386759,-3.2874568194,-2.0289040427 |
| H,0,-0.742106531,4.0316754929,0.0992475952    | C,0,0.6048453865,-2.5711112298,-3.0212017711  |
| H,0,-2.3473654834,3.3112032748,0.0599621835   | H,0,1.1995034898,-2.0836082905,-3.795601159   |
| C,0,-0.7928018465,1.9176426338,0.0794126974   | H,0,1.2832887784,-2.8301359111,-2.2035509163  |
| C,0,-0.0578466576,1.1055546993,0.7664120966   | H,0,0.2138795319,-3.5030914857,-3.4314047177  |
| C,0,0.8615329206,0.9234927186,1.8592127313    | C,0,-3.6840459001,0.8729370121,-0.9968620686  |
| C,0,1.3755388933,-0.33188335,2.1995000055     | H,0,-4.5361642641,0.2222208903,-0.7764255559  |
| C,0,1.2779752799,2.053830722,2.581482245      | C,0,-3.2298852209,1.5141134545,0.3243050357   |
| C,0,2.2812756327,-0.4538002107,3.2417972724   | H,0,-4.047028407,2.0797391645,0.7775562984    |
| H,0,1.0738356801,-1.1981855195,1.6317403234   | H,0,-2.8961622681,0.7531556019,1.0310961266   |
| C,0,2.1921696893,1.9259996825,3.6144427626    | H,0,-2.3960690063,2.1994958172,0.157874262    |
| H,0,0.881240183,3.0271050376,2.3219072839     | C,0,-4.1585358712,1.9397451083,-1.9917293515  |
| C,0,2.6957019157,0.6707137853,3.9484808175    | H,0,-4.4895770793,1.4884094767,-2.9287848909  |
| H,0,2.6693836053,-1.4312766751,3.4975270245   | H,0,-4.9914010304,2.5078788824,-1.5719945879  |
| H,0,2.5103940148,2.8031112303,4.1635680758    | H,0,-3.3609109968,2.6489809279,-2.2218801346  |
| H,0,3.4075266704,0.5715826399,4.7581968383    | Ru,0,0.4440642527,0.4948940127,0.1075522127   |
|                                               | C,0,2.8438603427,4.205677377,1.8826176152     |
| <sup>13</sup>                                 | C,0,3.5363420629,4.2582902894,3.0808274561    |
| C,0,-0.371966591,-0.2851627483,-2.5328528075  | C,0,3.6263884676,3.1085558512,3.8532038072    |
| C,0,-1.4021151371,0.536503277,-2.0644486815   | C,0,3.0334847221,1.9290948177,3.424060842     |
| C,0,-2.591691338,-0.0083769335,-1.5666070472  | C,0,2.3221952872,1.8460115452,2.2186376174    |
| C,0,-2.7095852299,-1.3928016917,-1.5655066457 | C,0,2.2289237909,3.0299847689,1.4522848841    |

---

|                                              |                                               |
|----------------------------------------------|-----------------------------------------------|
| H,0,2.7517126641,5.0800560906,1.2527779583   | H,0,4.5717450013,-1.817451189,-3.0450161252   |
| H,0,3.9943429443,5.1824790142,3.4086768306   | H,0,6.3994231134,-1.7630110057,0.8344849253   |
| H,0,4.1669020269,3.1204968457,4.7916610993   | H,0,6.4811944268,-2.3635393788,-1.5653192658  |
| H,0,3.1596877029,1.0511747837,4.0392403369   |                                               |
| C,0,1.4657790433,3.1462681103,0.1607192885   | <sup>3</sup> I3                               |
| O,0,1.7117253979,4.0142822517,-0.662376333   | C,0,-2.3695619225,-1.3735462013,-1.0751584019 |
| N,0,0.4364316688,2.2655387519,-0.0300138456  | C,0,-2.9488385375,-0.1066613849,-1.1883231254 |
| O,0,-0.6584432469,-0.9032760372,0.7849687863 | C,0,-3.9175025586,0.3271874318,-0.2786943359  |
| C,0,-0.7784933031,-1.4377231689,2.0743694259 | C,0,-4.2963538531,-0.5608240332,0.7234896937  |
| H,0,-0.4110149528,-2.4745026237,2.0624497495 | C,0,-3.728763386,-1.825984408,0.8344546685    |
| H,0,-1.8430048217,-1.4690343471,2.3408530196 | C,0,-2.7514364108,-2.2596115477,-0.0542106009 |
| C,0,-0.0070841572,-0.6563940834,3.1347810669 | H,0,-1.6822219548,-1.7031010662,-1.8456192215 |
| H,0,-0.1369843709,-1.1654129385,4.0945945852 | H,0,-2.634374818,0.5392331259,-1.9962716984   |
| H,0,-0.4289506389,0.3471465975,3.2388895228  | H,0,-5.0437101352,-0.2533124095,1.4456502736  |
| C,0,1.486435568,-0.5577529321,2.7867439374   | H,0,-4.0485471073,-2.4833686058,1.6344419484  |
| H,0,2.0458671621,-0.3771349562,3.7021171114  | C,0,-2.1024095534,-3.6089449032,0.0840307235  |
| H,0,1.8224720594,-1.5287961627,2.4117978386  | H,0,-1.9463997656,-4.080404674,-0.887951045   |
| C,0,1.8132152982,0.5148199042,1.7405185948   | H,0,-1.1220355169,-3.5202771364,0.5596832276  |
| C,0,2.197005091,0.0537221121,0.4370066993    | H,0,-2.7087007079,-4.2793801788,0.6933378494  |
| C,0,3.3450023415,-0.5976497895,-0.1159397147 | C,0,-4.4853165762,1.7302277207,-0.3378213139  |
| C,0,3.4132673798,-0.9322240106,-1.4788116097 | H,0,-5.3166208536,1.7679953245,0.37357571     |
| C,0,4.4428956302,-0.9011902066,0.7106578406  | C,0,-3.4307196764,2.7531317022,0.1148113929   |
| C,0,4.5306384561,-1.5654955464,-1.9929409501 | H,0,-3.8610633886,3.7566103455,0.1447565929   |
| H,0,2.5816765527,-0.6741266773,-2.1178078181 | H,0,-3.0468309403,2.504075388,1.1048186998    |
| C,0,5.5599697934,-1.5342258248,0.1902701496  | H,0,-2.5807351149,2.7654465149,-0.570247496   |
| H,0,4.4048837482,-0.6286170065,1.7571691516  | C,0,-5.0422324451,2.086709697,-1.7214212774   |
| C,0,5.6061058763,-1.87147422,-1.1602663211   | H,0,-5.7908093078,1.3621179769,-2.0475337819  |

---

|                                              |                                               |
|----------------------------------------------|-----------------------------------------------|
| H,0,-5.5084689436,3.0737897599,-1.6985186169 | C,0,1.1172564946,-0.9121693649,0.3500414865   |
| H,0,-4.2504806275,2.1177649314,-2.4724338873 | C,0,1.7934886627,-2.0220293031,-0.2460250731  |
| Ru,0,-0.4232552001,0.131142476,0.2401700635  | C,0,1.1918514546,-2.8453154471,-1.2156968616  |
| C,0,3.3311863856,2.7240456083,-1.1641226726  | C,0,3.1133245442,-2.3180751721,0.1510710547   |
| C,0,4.582540675,2.7382874209,-0.5770256586   | C,0,1.8762944393,-3.9166924853,-1.7597199374  |
| C,0,4.8070632386,1.9590019823,0.5513608946   | H,0,0.185053519,-2.6263550979,-1.5369306541   |
| C,0,3.7781031288,1.1938547879,1.0734705286   | C,0,3.7926298127,-3.3939008365,-0.3960914325  |
| C,0,2.4944350893,1.1708998081,0.5050078566   | H,0,3.5948255789,-1.6870230938,0.8851007587   |
| C,0,2.2802507348,1.9547070231,-0.6501058431  | C,0,3.179332921,-4.1992981136,-1.352093597    |
| H,0,3.1265907782,3.3143338222,-2.0461510057  | H,0,1.3974941146,-4.5356161297,-2.5080863613  |
| H,0,5.3742719988,3.347260975,-0.9942081842   | H,0,4.8066766265,-3.6043620993,-0.0802653026  |
| H,0,5.7807902275,1.9429456336,1.0252351816   | H,0,3.7130091967,-5.0377391029,-1.7806951824  |
| H,0,3.9873693323,0.5826436605,1.9402795886   |                                               |
| C,0,0.9841479104,2.0645616219,-1.4332995093  | <sup>1</sup> J3                               |
| O,0,0.9446187928,2.7203511973,-2.4680055842  | C,0,-2.2792274668,-1.1928439703,-1.3095440862 |
| N,0,-0.1376297694,1.4418023528,-0.9745697842 | C,0,-2.3022324143,0.2135185893,-1.2989983504  |
| O,0,-1.4232339806,0.432936873,1.8460173944   | C,0,-3.0568647721,0.9070041578,-0.3284331418  |
| C,0,-1.0061514072,0.6877521818,3.1611064251  | C,0,-3.7741301571,0.1498600937,0.5821088057   |
| H,0,-1.1162064166,-0.2335973525,3.7510419177 | C,0,-3.7650563265,-1.2489384628,0.558399631   |
| H,0,-1.6831704829,1.437827942,3.5879126155   | C,0,-3.0237661505,-1.9459392379,-0.3777743268 |
| C,0,0.4351357541,1.1780839444,3.2677336885   | H,0,-1.798316888,-1.7076714488,-2.1353952801  |
| H,0,0.6650886554,1.329243525,4.3263249911    | H,0,-1.8443231653,0.7530855775,-2.1168390815  |
| H,0,0.5307929889,2.1480600225,2.7715380058   | H,0,-4.3601245318,0.6561452533,1.3410844094   |
| C,0,1.42234301,0.1803243148,2.649525         | H,0,-4.3485492051,-1.7944309673,1.2907283476  |
| H,0,2.4128158765,0.3728721991,3.0608548877   | C,0,-2.9848961402,-3.4477077716,-0.418101947  |
| H,0,1.1500030039,-0.8327663661,2.9580710052  | H,0,-3.2642989317,-3.8247080479,-1.4051828597 |
| C,0,1.483989413,0.2343752223,1.1238133216    | H,0,-1.9776588545,-3.8151686459,-0.2057512926 |

---

|                                                |                                              |
|------------------------------------------------|----------------------------------------------|
| H,0,-3.6639107105,-3.8838159067,0.3146906213   | H,0,0.2062051193,-1.9034049345,2.5434173916  |
| C,0,-3.0400914011,2.4195373123,-0.2255713503   | H,0,-0.6422272738,-0.6730415847,3.4955579631 |
| H,0,-3.9883781486,2.7108492735,0.2387976325    | C,0,1.300384429,-0.0655612516,2.8163560079   |
| C,0,-1.9084257561,2.8769556455,0.7120144854    | H,0,1.7390645423,-0.400324834,3.7610159253   |
| H,0,-1.9605216724,3.9558500011,0.8756524107    | H,0,1.0675479347,0.9949970304,2.9253731234   |
| H,0,-1.9657934992,2.3712278993,1.6765991006    | C,0,2.3240689987,-0.2846083599,1.683633802   |
| H,0,-0.9345536471,2.6475836656,0.2788306707    | H,0,3.2922715097,0.12291061,1.993349076      |
| C,0,-2.9422903879,3.1316125345,-1.5783022401   | H,0,2.4655425758,-1.3574304669,1.5475712685  |
| H,0,-3.7221720796,2.7939211961,-2.2639389258   | C,0,1.8807126938,0.3322421528,0.3787602694   |
| H,0,-3.0564694992,4.2087275886,-1.4401890151   | C,0,1.8511414194,-0.3931545061,-0.8520780436 |
| H,0,-1.9748614402,2.9643282383,-2.0549319181   | C,0,2.6710660254,-1.5490577279,-1.268550989  |
| Ru,0,-0.1182573635,-0.4320829045,-0.2686288654 | C,0,2.2171048654,-2.4267519979,-2.2603241564 |
| C,0,1.6314057988,3.7862440529,-1.1715077869    | C,0,3.9403820773,-1.7568584481,-0.7209215875 |
| C,0,2.1388691112,4.6026492883,-0.1683358487    | C,0,3.0008782525,-3.4937231692,-2.6714056301 |
| C,0,2.5355591523,4.0295021977,1.0326434777     | H,0,1.2463118854,-2.2592712414,-2.705544511  |
| C,0,2.4331707559,2.6559342699,1.2350130814     | C,0,4.7232712031,-2.8289098761,-1.1315236116 |
| C,0,1.9312531132,1.8167007353,0.2379857538     | H,0,4.3266672714,-1.0637289719,0.0138038501  |
| C,0,1.5291014463,2.4168622219,-0.9743109935    | C,0,4.2548690057,-3.7045660196,-2.103714433  |
| H,0,1.2871784816,4.1955209456,-2.111984586     | H,0,2.6335579405,-4.1649097803,-3.4376131607 |
| H,0,2.2145295834,5.6716455846,-0.3182455636    | H,0,5.705409089,-2.972428841,-0.698713087    |
| H,0,2.929547555,4.6528913094,1.8258493756      | H,0,4.8651289667,-4.5390461263,-2.4250558396 |
| H,0,2.7618418655,2.2479170772,2.1792668251     |                                              |
| C,0,0.8766038253,1.5715539973,-2.0137908152    | <sup>3</sup> J                               |
| O,0,0.2281284073,2.0251975387,-2.9336839665    | C,0,1.3534825368,2.4008057936,-1.0134863876  |
| N,0,0.9643074126,0.1906389062,-1.7854141655    | C,0,2.0555707791,1.1930966201,-1.1959250944  |
| O,0,-0.7525574986,-0.4065473603,1.4913908227   | C,0,3.1896651106,0.899745361,-0.4079904756   |
| C,0,-0.0042380216,-0.8288085232,2.6189777073   | C,0,3.5745926291,1.8436087367,0.5329536075   |

---

|                                               |                                               |
|-----------------------------------------------|-----------------------------------------------|
| C,0,2.8804048751,3.0411515844,0.7060221762    | H,0,0.8325408684,-3.9961744488,-2.215729829   |
| C,0,1.7623815694,3.344001618,-0.0557029338    | H,0,0.9822159833,-5.853975865,-0.5493524938   |
| H,0,0.5583532393,2.6544233184,-1.7058874034   | H,0,0.133008166,-5.4844256719,1.749770127     |
| H,0,1.798083848,0.5615305275,-2.0373818993    | H,0,-0.8644650196,-3.3457614861,2.3797681998  |
| H,0,4.4388691277,1.6434494386,1.1557807528    | C,0,-0.107202403,-1.5305740035,-1.835129183   |
| H,0,3.2211696145,3.7466131199,1.4545975494    | O,0,0.6105405874,-1.5432835009,-2.8224944355  |
| C,0,0.9805105271,4.6116533509,0.1450040354    | N,0,-0.895348058,-0.4220220076,-1.5374238699  |
| H,0,0.6896808476,5.0568354601,-0.8087509555   | O,0,0.8697795711,0.7722221491,1.8940778215    |
| H,0,0.0609891581,4.4117945898,0.7030896347    | C,0,0.0367549891,0.7206780742,3.0293315337    |
| H,0,1.5537363224,5.3504375394,0.7054172121    | H,0,-0.7028257622,1.5372503773,3.0094871225   |
| C,0,3.9394870654,-0.4125766747,-0.5300278504  | H,0,0.6731462644,0.8866283827,3.9066305656    |
| H,0,4.956094977,-0.2211929466,-0.1708176494   | C,0,-0.6900572022,-0.6167786133,3.2008034635  |
| C,0,3.3193963471,-1.4738689531,0.3960301535   | H,0,-1.1589339954,-0.6210309749,4.1899406889  |
| H,0,3.9376694551,-2.3741557272,0.4146946589   | H,0,0.0583666341,-1.4118979819,3.1943778981   |
| H,0,3.2099930247,-1.099002206,1.4141172154    | C,0,-1.7819527975,-0.8830327312,2.1433569601  |
| H,0,2.3294598858,-1.7652457901,0.0400652759   | H,0,-2.3932425309,-1.73279323,2.4649040396    |
| C,0,4.0375755521,-0.9375154376,-1.9661198381  | H,0,-2.446389926,-0.0190251739,2.127819705    |
| H,0,4.4532657084,-0.1834607276,-2.6375295117  | C,0,-1.2406615081,-1.1300235314,0.7488409481  |
| H,0,4.6885259026,-1.813661497,-1.9970115679   | C,0,-1.6878418964,-0.3805486466,-0.4010078441 |
| H,0,3.0631892133,-1.2403130107,-2.3533873243  | C,0,-2.9193642475,0.4489778613,-0.4826477406  |
| Ru,0,0.1196585326,0.4551644756,0.1514649084   | C,0,-2.9328491448,1.63402128,-1.2261046488    |
| C,0,0.4492150113,-3.8811616641,-1.2106925818  | C,0,-4.1036163348,0.0217160324,0.1218596161   |
| C,0,0.5385283041,-4.904751547,-0.2784218068   | C,0,-4.0925742316,2.3874914776,-1.3308903142  |
| C,0,0.0632976126,-4.6942146068,1.0124341968   | H,0,-2.0301851619,1.9466546046,-1.7325320141  |
| C,0,-0.5012164142,-3.4762523357,1.3708558359  | C,0,-5.2677752409,0.7717016804,0.007585016    |
| C,0,-0.6097930478,-2.4379377652,0.4411010967  | H,0,-4.1190664132,-0.9131511618,0.6658894137  |
| C,0,-0.1182669004,-2.6619630898,-0.8604964203 | C,0,-5.2638271566,1.9616134307,-0.7107530199  |

---

|                                               |                                              |
|-----------------------------------------------|----------------------------------------------|
| H,0,-4.0858757044,3.306070146,-1.9040174966   | H,0,-5.0319378709,3.8888482322,-0.754866061  |
| H,0,-6.1797034099,0.4215372877,0.4745014882   | H,0,-3.6721144546,3.4063043668,-1.7642855119 |
| H,0,-6.1697143334,2.54810869,-0.7970393271    | Ru,0,0.7651053325,0.0374266568,-0.7667772776 |
|                                               | C,0,3.5288076298,2.72535102,0.8222160976     |
| <sup>1</sup> TS8a                             | C,0,4.8173044378,2.3632759659,0.4597949108   |
| C,0,-1.9162288996,-0.367658179,-2.2068465847  | C,0,5.0166175119,1.182015094,-0.2567219732   |
| C,0,-2.4936874229,0.7833012749,-1.6830390981  | C,0,3.9643741108,0.321369975,-0.5165213568   |
| C,0,-3.6109090478,0.7179014629,-0.8485029631  | C,0,2.6661511613,0.5913616509,-0.0313296268  |
| C,0,-4.1406445201,-0.5434873924,-0.5833004414 | C,0,2.4636867197,1.876990709,0.5479327546    |
| C,0,-3.558365885,-1.69978597,-1.0963920888    | H,0,3.3137569207,3.6889401118,1.2678594868   |
| C,0,-2.4310982378,-1.6365828255,-1.9109095548 | H,0,5.6541675509,3.0116808489,0.6850435826   |
| H,0,-1.0751646949,-0.2901578278,-2.887764863  | H,0,6.0068951942,0.9266580024,-0.6130689295  |
| H,0,-2.0390516037,1.7396984528,-1.8998875586  | H,0,4.1693139222,-0.5836490888,-1.0648775186 |
| H,0,-5.0113952639,-0.6284419806,0.0577992742  | C,0,1.0834612118,2.4284298072,0.4955721974   |
| H,0,-3.9847092313,-2.6655257508,-0.8499770498 | O,0,0.6365515886,3.3300105439,1.1772842349   |
| C,0,-1.7970395567,-2.8729144194,-2.4868126222 | N,0,0.3603927828,1.7766311081,-0.4996988373  |
| H,0,-0.7161204521,-2.7475073042,-2.5583572524 | O,0,1.2131907719,-1.2518015174,-2.1712074029 |
| H,0,-2.0137365548,-3.7514750724,-1.8770062181 | C,0,2.2779325405,-2.1649503832,-2.1394228404 |
| H,0,-2.175197409,-3.0701889748,-3.4942841392  | H,0,3.2370676932,-1.6690495906,-2.3424263719 |
| C,0,-4.1830150417,1.9669917874,-0.2073341724  | H,0,2.1207901334,-2.8701343189,-2.9657915964 |
| H,0,-5.102626713,1.6723337529,0.3093447968    | C,0,2.3474633466,-2.9838521777,-0.8412999248 |
| C,0,-3.2112140399,2.5321824933,0.8411481781   | H,0,3.0558499012,-3.8066339412,-0.9751524217 |
| H,0,-3.6327393383,3.4208892848,1.3162247948   | H,0,1.3604010422,-3.4270892548,-0.6861868872 |
| H,0,-3.0006493826,1.7984820157,1.6210465703   | C,0,2.7386849399,-2.2021351963,0.4392000575  |
| H,0,-2.2558279729,2.8107235282,0.3919624509   | H,0,2.5386636814,-2.8353545633,1.3073707075  |
| C,0,-4.5568291862,3.0352955405,-1.243067506   | H,0,3.8042730252,-1.9799715152,0.4481805584  |
| H,0,-5.2471370189,2.6389407926,-1.9901343996  | C,0,1.9209780614,-0.95842546,0.5901423865    |



---

|                                              |                                               |
|----------------------------------------------|-----------------------------------------------|
| C,0,0.665485473,-0.7804800275,1.0021609539   | H,0,1.5537363224,5.3504375394,0.7054172121    |
| C,0,-0.2533040338,-1.0565682641,2.0584131001 | C,0,3.9394870654,-0.4125766747,-0.5300278504  |
| C,0,-1.6302253403,-0.875145494,1.868154534   | H,0,4.956094977,-0.2211929466,-0.1708176494   |
| C,0,0.2139266538,-1.5073729872,3.3063479503  | C,0,3.3193963471,-1.4738689531,0.3960301535   |
| C,0,-2.5188462412,-1.1527368985,2.8924600735 | H,0,3.9376694551,-2.3741557272,0.4146946589   |
| H,0,-1.9868759405,-0.5212425149,0.9131306952 | H,0,3.2099930247,-1.099002206,1.4141172154    |
| C,0,-0.6817797708,-1.7793834749,4.327092319  | H,0,2.3294598858,-1.7652457901,0.0400652759   |
| H,0,1.2784678682,-1.6226957724,3.4651613323  | C,0,4.0375755521,-0.9375154376,-1.9661198381  |
| C,0,-2.0495723169,-1.6056538414,4.1230292188 | H,0,4.4532657084,-0.1834607276,-2.6375295117  |
| H,0,-3.5797948622,-1.0104980773,2.7317400211 | H,0,4.6885259026,-1.813661497,-1.9970115679   |
| H,0,-0.3163709367,-2.1206633,5.287278278     | H,0,3.0631892133,-1.2403130107,-2.3533873243  |
| H,0,-2.7458239134,-1.8166393984,4.9247429649 | Ru,0,0.1196585326,0.4551644756,0.1514649084   |
|                                              | C,0,0.4492150113,-3.8811616641,-1.2106925818  |
| <sup>1</sup> TS9a                            | C,0,0.5385283041,-4.904751547,-0.2784218068   |
| C,0,1.3534825368,2.4008057936,-1.0134863876  | C,0,0.0632976126,-4.6942146068,1.0124341968   |
| C,0,2.0555707791,1.1930966201,-1.1959250944  | C,0,-0.5012164142,-3.4762523357,1.3708558359  |
| C,0,3.1896651106,0.899745361,-0.4079904756   | C,0,-0.6097930478,-2.4379377652,0.4411010967  |
| C,0,3.5745926291,1.8436087367,0.5329536075   | C,0,-0.1182669004,-2.6619630898,-0.8604964203 |
| C,0,2.8804048751,3.0411515844,0.7060221762   | H,0,0.8325408684,-3.9961744488,-2.215729829   |
| C,0,1.7623815694,3.344001618,-0.0557029338   | H,0,0.9822159833,-5.853975865,-0.5493524938   |
| H,0,0.5583532393,2.6544233184,-1.7058874034  | H,0,0.133008166,-5.4844256719,1.749770127     |
| H,0,1.798083848,0.5615305275,-2.0373818993   | H,0,-0.8644650196,-3.3457614861,2.3797681998  |
| H,0,4.4388691277,1.6434494386,1.1557807528   | C,0,-0.107202403,-1.5305740035,-1.835129183   |
| H,0,3.2211696145,3.7466131199,1.4545975494   | O,0,0.6105405874,-1.5432835009,-2.8224944355  |
| C,0,0.9805105271,4.6116533509,0.1450040354   | N,0,-0.895348058,-0.4220220076,-1.5374238699  |
| H,0,0.6896808476,5.0568354601,-0.8087509555  | O,0,0.8697795711,0.7722221491,1.8940778215    |
| H,0,0.0609891581,4.4117945898,0.7030896347   | C,0,0.0367549891,0.7206780742,3.0293315337    |

---

|                                               |                                               |
|-----------------------------------------------|-----------------------------------------------|
| H,0,-0.7028257622,1.5372503773,3.0094871225   | C,0,4.0708049324,1.7719917337,0.3337737018    |
| H,0,0.6731462644,0.8866283827,3.9066305656    | C,0,3.1800795698,2.4295033194,-0.5096742781   |
| C,0,-0.6900572022,-0.6167786133,3.2008034635  | H,0,1.7515320674,2.1192479046,-2.0932479407   |
| H,0,-1.1589339954,-0.6210309749,4.1899406889  | H,0,1.9662777242,-0.3168169567,-2.1194332497  |
| H,0,0.0583666341,-1.4118979819,3.1943778981   | H,0,4.8821071576,-0.0893153512,1.0061535308   |
| C,0,-1.7819527975,-0.8830327312,2.1433569601  | H,0,4.6726349605,2.3507067255,1.0248552445    |
| H,0,-2.3932425309,-1.73279323,2.4649040396    | C,0,3.0064785674,3.9211807705,-0.4444706528   |
| H,0,-2.446389926,-0.0190251739,2.127819705    | H,0,2.5230795384,4.3084489036,-1.3421653154   |
| C,0,-1.2406615081,-1.1300235314,0.7488409481  | H,0,2.384413388,4.1916990782,0.4132111434     |
| C,0,-1.6878418964,-0.3805486466,-0.4010078441 | H,0,3.9653883398,4.4289856344,-0.3265421634   |
| C,0,-2.9193642475,0.4489778613,-0.4826477406  | C,0,3.5566791961,-1.9133552394,-0.5382141784  |
| C,0,-2.9328491448,1.63402128,-1.2261046488    | H,0,4.2413149304,-2.1782120976,0.2738722857   |
| C,0,-4.1036163348,0.0217160324,0.1218596161   | C,0,2.2137134755,-2.605655204,-0.26876552     |
| C,0,-4.0925742316,2.3874914776,-1.3308903142  | H,0,2.3527164647,-3.6839461145,-0.1668985167  |
| H,0,-2.0301851619,1.9466546046,-1.7325320141  | H,0,1.7498085167,-2.2301963373,0.6440882632   |
| C,0,-5.2677752409,0.7717016804,0.007585016    | H,0,1.514571006,-2.4413111242,-1.0890624845   |
| H,0,-4.1190664132,-0.9131511618,0.6658894137  | C,0,4.1719054201,-2.4140650216,-1.8535510629  |
| C,0,-5.2638271566,1.9616134307,-0.7107530199  | H,0,5.1422702379,-1.9498742165,-2.0388664974  |
| H,0,-4.0858757044,3.306070146,-1.9040174966   | H,0,4.3090166808,-3.4972991197,-1.8247251358  |
| H,0,-6.1797034099,0.4215372877,0.4745014882   | H,0,3.5189938896,-2.1829724205,-2.6978454268  |
| H,0,-6.1697143334,2.54810869,-0.7970393271    | Ru,0,0.2696763449,0.8408625,0.1393183314      |
| <sup>3</sup> TS9a                             | C,0,-1.6658846794,-3.2271438903,-1.3675037639 |
| C,0,2.4122354412,1.6443448837,-1.3763590969   | C,0,-2.0601586992,-4.2598958864,-0.5290070911 |
| C,0,2.5373003643,0.2484846738,-1.3933754809   | C,0,-2.0914106502,-4.0393627518,0.8395361802  |
| C,0,3.4252885948,-0.4042599251,-0.5318961396  | C,0,-1.7728636807,-2.7869592675,1.3496043712  |
| C,0,4.1873918899,0.3876368578,0.3240769507    | C,0,-1.4176537492,-1.7170603265,0.5190802661  |
|                                               | C,0,-1.3261316994,-1.9717375454,-0.8701383542 |

---

|                                               |                                               |
|-----------------------------------------------|-----------------------------------------------|
| H,0,-1.572912511,-3.3831931013,-2.4334391122  | H,0,-4.0680385547,4.1233766333,-1.5961445277  |
| H,0,-2.3132433109,-5.2293113824,-0.9387138996 | H,0,-6.1675054735,1.041273905,0.5257392443    |
| H,0,-2.3640182543,-4.8374968695,1.5189464986  | H,0,-6.1880636296,3.1251436465,-0.805612191   |
| H,0,-1.8088969709,-2.6517700576,2.4198308237  |                                               |
| C,0,-0.7452388587,-1.002337725,-1.8877725886  | <sup>1</sup> I2                               |
| O,0,-0.3957006666,-1.4189644093,-2.9959035496 | C,0,-3.0750316472,-0.5504879406,-0.9183177925 |
| N,0,-0.5518607602,0.280788605,-1.5384819263   | C,0,-2.6416848186,0.6690385852,-1.4203899697  |
| O,0,1.3314895431,1.1764201951,1.7003543828    | C,0,-2.9648531276,1.8729677404,-0.7841733844  |
| C,0,1.1887696894,0.7617857821,3.0283017768    | C,0,-3.7285073061,1.7997076678,0.3769562942   |
| H,0,0.7897943626,1.5960439478,3.6261156496    | C,0,-4.1551111762,0.5750129601,0.8832735532   |
| H,0,2.1833754534,0.5248962713,3.4278391707    | C,0,-3.8361139696,-0.6206207292,0.2497327787  |
| C,0,0.2709272947,-0.4501414376,3.2156814901   | H,0,-2.812659126,-1.4628254357,-1.4382212035  |
| H,0,0.1995887591,-0.6605199821,4.2873517643   | H,0,-2.042807453,0.6888236465,-2.3233308911   |
| H,0,0.7163719527,-1.3284101706,2.7408391119   | H,0,-3.9969389722,2.7029112515,0.9079253593   |
| C,0,-1.1280019528,-0.2017218564,2.6342808996  | H,0,-4.7452712879,0.555400454,1.7930450561    |
| H,0,-1.8585311812,-0.863234927,3.1015307311   | C,0,-4.2531443896,-1.9476555433,0.8245803956  |
| H,0,-1.4395131975,0.8135604337,2.8939512768   | H,0,-4.4733445665,-2.6722587162,0.0387916951  |
| C,0,-1.1842365603,-0.3598804592,1.1154525026  | H,0,-3.4527543141,-2.373986099,1.4361252171   |
| C,0,-1.5876879219,0.8007367479,0.4009429729   | H,0,-5.1373297995,-1.8500064174,1.4561952825  |
| C,0,-2.8204902,1.432054788,0.0612278441       | C,0,-2.5106132254,3.1824518631,-1.4036553408  |
| C,0,-2.8443705099,2.6149107159,-0.6971354002  | H,0,-1.4752127638,3.0276660106,-1.7232987227  |
| C,0,-4.0316863932,0.8671671615,0.4975907033   | C,0,-3.3369548755,3.4953082124,-2.6627819223  |
| C,0,-4.0502060273,3.2157295837,-1.0069674675  | H,0,-2.9725492463,4.4042284632,-3.1474470949  |
| H,0,-1.9065920721,3.0304272047,-1.0393076026  | H,0,-3.2847157354,2.6804343301,-3.3859117806  |
| C,0,-5.2361327633,1.4783889422,0.1898518485   | H,0,-4.3874948955,3.6460446813,-2.4017447868  |
| H,0,-4.0083554822,-0.0538284266,1.0653814087  | C,0,-2.5358816167,4.3715799256,-0.4410913441  |
| C,0,-5.2458013431,2.6507080521,-0.5616137552  | H,0,-1.9977333411,4.1536030702,0.4817101545   |

---

|                                               |                                               |
|-----------------------------------------------|-----------------------------------------------|
| H,0,-2.0737736911,5.2421547035,-0.9104832853  | C,0,2.0471049194,-0.6646935468,0.3857785233   |
| H,0,-3.5602536443,4.6503162822,-0.1816911802  | C,0,3.3697233068,-0.1437721579,0.2551745186   |
| Ru,0,0.332627835,-0.2857719333,-0.2552504452  | C,0,4.4566592046,-0.8007641092,0.8673173431   |
| C,0,-0.868593208,-3.3467492571,-1.509594544   | C,0,3.6229396225,0.9852815422,-0.5455791447   |
| C,0,-1.6042451111,-4.1826211761,-0.715840236  | C,0,5.7433489297,-0.3161673688,0.719783409    |
| C,0,-1.3306332692,-4.2306174426,0.6601523178  | H,0,4.2824749761,-1.702875469,1.438712599     |
| C,0,-0.3598901039,-3.4342424212,1.2004694499  | C,0,4.9178919775,1.4567198728,-0.6925139204   |
| C,0,0.4455912435,-2.5533581596,0.4122748404   | H,0,2.7966883186,1.4595176853,-1.0536672277   |
| C,0,0.1711717858,-2.5270037884,-1.0026722376  | C,0,5.9778519207,0.8189218315,-0.0554018473   |
| H,0,-1.0374537296,-3.3220432592,-2.5781687755 | H,0,6.5699785378,-0.8287679415,1.1950052766   |
| H,0,-2.3749554015,-4.8102338022,-1.1438467024 | H,0,5.1035830532,2.3213214368,-1.3168841671   |
| H,0,-1.8895969787,-4.900289131,1.301381655    | H,0,6.9870708169,1.1921612128,-0.1748642726   |
| H,0,-0.1823860506,-3.5042867992,2.2608823064  | C,0,0.9894958672,4.0349087043,-0.110554286    |
| C,0,0.9041267137,-1.7958112292,-2.161114685   | H,0,0.7834968218,4.219053623,-1.1635488536    |
| O,0,1.5130794864,-2.4383182805,-2.9946933027  | H,0,0.5684751844,4.8226700929,0.508567807     |
| N,0,0.7360325803,-0.4499350691,-2.0758722881  | H,0,2.0743098167,4.0205429753,0.0182626573    |
| O,0,-0.9015627953,0.1880889081,1.4710291648   | C,0,0.44728026,2.6864215652,0.3029604986      |
| C,0,-0.8076830183,-0.4490177681,2.7487960972  | O,0,0.6126791368,1.7574017817,-0.5604013814   |
| H,0,-1.2899451069,-1.4221144027,2.657023566   | O,0,-0.092524681,2.5557812086,1.4210059922    |
| H,0,-1.3964622261,0.1472599547,3.4506423833   | H,0,-0.6620609587,1.1849863769,1.5571920378   |
| C,0,0.6278937652,-0.5647121751,3.2655859583   |                                               |
| H,0,0.5977209238,-0.7400451544,4.3443247936   | <sup>3</sup> I2                               |
| H,0,1.1059378536,0.4066034193,3.117964724     | C,0,-2.7702599308,-0.4230628507,-0.7697917794 |
| C,0,1.5105772808,-1.6635913319,2.6206866897   | C,0,-2.7169483623,0.8854148524,-1.2595408877  |
| H,0,2.5451980429,-1.4531538998,2.8914971517   | C,0,-3.2693492207,1.9487310706,-0.5444434215  |
| H,0,1.2766666917,-2.6365592895,3.0477379848   | C,0,-3.8957690375,1.6523059769,0.6661604091   |
| C,0,1.4099626679,-1.6763077441,1.1063864203   | C,0,-3.9587623456,0.3511580282,1.1496617092   |

---

|                                               |                                              |
|-----------------------------------------------|----------------------------------------------|
| C,0,-3.3945887886,-0.7119810888,0.4474801013  | H,0,0.3367203162,-6.0944646425,-1.8097707423 |
| H,0,-2.3600394063,-1.2271351353,-1.3667771394 | H,0,-0.1815620072,-5.9840778675,0.6219243189 |
| H,0,-2.2446586203,1.0657485898,-2.2177064995  | H,0,-0.1280955259,-3.8534449736,1.7888961693 |
| H,0,-4.335372494,2.4490167313,1.2530841518    | C,0,0.8145587473,-1.5399562179,-2.2566216535 |
| H,0,-4.4512171359,0.1607544908,2.0969666036   | O,0,1.5034948413,-1.6518837811,-3.2638076122 |
| C,0,-3.4822015568,-2.1279021029,0.9472074975  | N,0,0.1105889466,-0.4221783151,-1.9499188311 |
| H,0,-2.6035796119,-2.7054425789,0.6572111907  | O,0,-0.7677950989,1.460496798,1.4594567665   |
| H,0,-3.576154451,-2.163876077,2.0339625504    | C,0,-0.8590316007,0.9448407779,2.7890013977  |
| H,0,-4.3566980834,-2.6338417283,0.5281260612  | H,0,-1.8629965021,0.5295864926,2.8979558307  |
| C,0,-3.1955110699,3.3611938279,-1.088570005   | H,0,-0.7619190959,1.7831506715,3.483624242   |
| H,0,-2.475933712,3.3448581501,-1.9126841459   | C,0,0.1851145986,-0.1166953149,3.0959794013  |
| C,0,-4.5538059755,3.796745204,-1.6590831923   | H,0,0.1027978602,-0.3534276885,4.1607929222  |
| H,0,-4.4859974301,4.7953584202,-2.0966423749  | H,0,1.1840945656,0.3033929604,2.9483664975   |
| H,0,-4.8985100725,3.1063474015,-2.4307337234  | C,0,0.0280841947,-1.4205476737,2.3041294041  |
| H,0,-5.3107662784,3.8246672947,-0.8712659093  | H,0,0.6385996065,-2.1801128663,2.8051304453  |
| C,0,-2.6864783348,4.3706872481,-0.0520893248  | H,0,-1.0064752302,-1.7658663999,2.3757660617 |
| H,0,-1.7328259554,4.0628600554,0.3749878769   | C,0,0.4536243295,-1.3854256317,0.8371058176  |
| H,0,-2.554084629,5.3508702663,-0.5150955618   | C,0,1.4650960765,-0.4582296558,0.4527718399  |
| H,0,-3.3983755502,4.4920037792,0.767332065    | C,0,2.8845262265,-0.3977920103,0.3975143226  |
| Ru,0,-0.0242585005,0.3688699154,-0.2584512007 | C,0,3.6390545305,-1.3580232247,1.1002156689  |
| C,0,0.630255338,-3.9743725847,-1.9704502275   | C,0,3.5522335737,0.5901909569,-0.3508776286  |
| C,0,0.3448292415,-5.1465225541,-1.2871854744  | C,0,5.0213914544,-1.3177079564,1.0685087656  |
| C,0,0.0544845988,-5.0832997675,0.06882788     | H,0,3.1226337302,-2.1307077009,1.6545018635  |
| C,0,0.0753142667,-3.8620360816,0.7285406558   | C,0,4.9345668086,0.6169083186,-0.3814266733  |
| C,0,0.3631601098,-2.6626637989,0.0602013038   | H,0,2.9654548984,1.3023696133,-0.9139518391  |
| C,0,0.6152873208,-2.7339563337,-1.3329480581  | C,0,5.6703941869,-0.3299705386,0.3297667497  |
| H,0,0.8530412797,-3.9894111941,-3.0287777067  | H,0,5.5974386185,-2.0580311189,1.6084621266  |

---

|                                               |                                               |
|-----------------------------------------------|-----------------------------------------------|
| H,0,5.4459392388,1.3697723862,-0.9669578925   | H,0,-2.1719269435,1.0916263902,-3.2098167237  |
| H,0,6.7523959656,-0.3044116541,0.3002786384   | C,0,-3.8595117322,2.4093399866,-3.0942000786  |
| C,0,1.6341307183,4.4523990265,-0.9708179009   | H,0,-3.6005312335,2.9345152884,-4.0159225767  |
| H,0,0.9953253409,4.7618110399,-1.7994261555   | H,0,-4.6135815172,1.6561533327,-3.3309021862  |
| H,0,1.8082206901,5.2904987198,-0.3008453011   | H,0,-4.3136219731,3.1365759897,-2.4167082717  |
| H,0,2.5762156863,4.1119853303,-1.4028829179   | C,0,-1.5428109376,2.8285604093,-2.1508003979  |
| C,0,0.9726706964,3.3076288235,-0.2386920843   | H,0,-0.6324243756,2.3513313375,-1.7920105342  |
| O,0,0.7507313386,2.2639183228,-0.9448963445   | H,0,-1.2971236751,3.4074391612,-3.0439266242  |
| O,0,0.6809892254,3.4384411355,0.9695428896    | H,0,-1.90115226,3.5220666567,-1.3848699999    |
| H,0,-0.1845255522,2.3071034221,1.4056129031   | Ru,0,-0.1001556469,-0.5803566408,0.1391489932 |
|                                               | C,0,-0.3612978514,-3.1848167597,-2.0312314622 |
| <sup>1</sup> J2                               | C,0,-0.3257513912,-4.4121718801,-1.435923217  |
| C,0,-2.7721500929,-1.1488588902,-0.0071421093 | C,0,0.5393484463,-4.6361707294,-0.3395905931  |
| C,0,-2.5336384166,-0.3887280288,-1.1602271166 | C,0,1.3129415742,-3.6277570288,0.159947133    |
| C,0,-2.9355225994,0.9499339376,-1.2447451012  | C,0,1.264510666,-2.3157117513,-0.3993628378   |
| C,0,-3.6013973591,1.4869745938,-0.1491753237  | C,0,0.424940982,-2.1095930888,-1.5367513691   |
| C,0,-3.8594749943,0.7284616038,0.9901411272   | H,0,-0.9606590281,-2.9936578115,-2.9106886262 |
| C,0,-3.4503997795,-0.5957007484,1.089143775   | H,0,-0.9301171949,-5.2244534393,-1.8184967586 |
| H,0,-2.5153700341,-2.201602092,0.0035541138   | H,0,0.6003404186,-5.6239967079,0.099634226    |
| H,0,-2.1048928986,-0.8548874707,-2.0359397657 | H,0,1.9872034569,-3.8328638203,0.9774931413   |
| H,0,-3.9247938741,2.5206918002,-0.1726669323  | C,0,0.4483836863,-0.8327201202,-2.3064431558  |
| H,0,-4.375428947,1.1850946616,1.8270367925    | O,0,-0.0932271686,-0.7229416115,-3.3926035909 |
| C,0,-3.7328327334,-1.4043938809,2.3247670363  | N,0,0.9623444557,0.2615332176,-1.6152345884   |
| H,0,-4.7917788755,-1.6702708988,2.3860105683  | O,0,-0.5273498336,-1.4377628308,2.0674214307  |
| H,0,-3.1490177864,-2.3239632035,2.3351158293  | C,0,0.5708961379,-1.8466265552,2.9029557248   |
| H,0,-3.4800529115,-0.83416715,3.2203032655    | H,0,0.7612952189,-2.8979229706,2.6886160469   |
| C,0,-2.6094508056,1.7720085104,-2.474948196   | H,0,0.222420978,-1.7736977538,3.9360748304    |

---

|                                              |                                              |
|----------------------------------------------|----------------------------------------------|
| C,0,1.8349753968,-1.0044967587,2.7410612995  | <sup>3</sup> J2                              |
| H,0,2.4675243803,-1.1855681286,3.6154776791  | C,0,2.7013705904,0.9235696296,0.4672789088   |
| H,0,1.5525534815,0.0501220963,2.7738901177   | C,0,2.6526893311,0.1388990789,-0.6911619152  |
| C,0,2.6813179997,-1.2719816145,1.4810010151  | C,0,3.0403559195,-1.2048308026,-0.6748366009 |
| H,0,3.5110757008,-0.5709054531,1.4921237557  | C,0,3.4925472818,-1.7234902792,0.5371004919  |
| H,0,3.127511837,-2.2652847246,1.549294641    | C,0,3.5476728465,-0.9444118418,1.6866809692  |
| C,0,1.9197952487,-1.1518100261,0.1753770737  | C,0,3.148227473,0.3910429679,1.681405504     |
| C,0,1.8030503595,0.095585851,-0.5444360532   | H,0,2.4449405258,1.9759303806,0.4064653811   |
| C,0,2.61796921,1.2956240198,-0.1992901679    | H,0,2.3532395745,0.5877464193,-1.628802351   |
| C,0,4.0105781363,1.1904516727,-0.1896096547  | H,0,3.7999859071,-2.7605283793,0.5914585853  |
| C,0,2.0324228869,2.5476977649,-0.0087484437  | H,0,3.8987588946,-1.3861455889,2.6121457169  |
| C,0,4.8046027699,2.3086426024,0.034489006    | C,0,3.1594506247,1.2226863101,2.9330583389   |
| H,0,4.4774887552,0.232920952,-0.3854312064   | H,0,3.8570810164,0.8244523362,3.6703675787   |
| C,0,2.8265857523,3.6610687905,0.2301552702   | H,0,3.4388351296,2.2564589256,2.721111168    |
| H,0,0.958339472,2.6338650142,-0.0440214267   | H,0,2.1639274315,1.2348275319,3.3835917971   |
| C,0,4.2130607905,3.5465087352,0.2567228542   | C,0,2.931289438,-2.0542069466,-1.923867522   |
| H,0,5.8829985872,2.2125177778,0.0280525849   | H,0,2.6199682691,-1.3937679286,-2.7352664171 |
| H,0,2.3601396193,4.6259795117,0.3855141378   | C,0,4.2752155753,-2.6869326685,-2.3072963463 |
| H,0,4.8287687931,4.4189470231,0.4359150807   | H,0,4.1795137733,-3.2374126234,-3.2455398387 |
| C,0,-1.2206968358,3.0420041072,2.322221224   | H,0,5.0505068606,-1.928595979,-2.434001924   |
| H,0,-1.7076399814,3.4761723136,1.4503747569  | H,0,4.6166778956,-3.3914780201,-1.5450122892 |
| H,0,-1.8112473111,3.2134055406,3.2187961277  | C,0,1.8345129629,-3.1179230682,-1.7681493695 |
| H,0,-0.2474074944,3.5250529222,2.4342873669  | H,0,0.8767462086,-2.6560346594,-1.5347477961 |
| C,0,-1.0039639171,1.5632718966,2.1064704108  | H,0,1.7295724061,-3.6842141117,-2.6960880759 |
| O,0,-0.5441925461,1.2571175246,0.9540598471  | H,0,2.0809917727,-3.8194449249,-0.9666452803 |
| O,0,-1.2496837497,0.7565139971,3.027079608   | Ru,0,-0.0016167237,0.1351555443,0.4550747287 |
| H,0,-0.9262844917,-0.6056754218,2.5226901984 | C,0,0.3941393781,2.6593891201,-3.1433898803  |

---

|                                               |                                               |
|-----------------------------------------------|-----------------------------------------------|
| C,0,0.4280574867,4.0340772853,-2.9593829065   | C,0,-5.3663164166,-1.0257299455,-0.1213682194 |
| C,0,-0.1823699774,4.5832497995,-1.836035432   | H,0,-4.4091241014,0.8087701675,-0.6757025785  |
| C,0,-0.8251644899,3.7731670688,-0.9101249964  | C,0,-3.902810179,-2.8885892482,0.2939956112   |
| C,0,-0.8796245838,2.382039957,-1.0820015961   | H,0,-1.799834946,-2.4968844173,0.0657772633   |
| C,0,-0.2434428186,1.8391454333,-2.2202796651  | C,0,-5.1891929609,-2.3586672333,0.227586363   |
| H,0,0.8722789828,2.1906793469,-3.9929735609   | H,0,-6.3633594794,-0.6104994462,-0.1980613649 |
| H,0,0.9291295108,4.6705792189,-3.6769435385   | H,0,-3.7596784319,-3.9303959581,0.552252491   |
| H,0,-0.1630442172,5.6546047776,-1.6787357308  | H,0,-6.0474175594,-2.9847351947,0.4367452258  |
| H,0,-1.3001430687,4.2415335219,-0.0614161625  | C,0,0.860827723,-3.8397600363,2.2928570194    |
| C,0,-0.1744900444,0.3562311566,-2.3897424941  | H,0,1.949953355,-3.9038460697,2.2394798224    |
| O,0,0.5092204926,-0.1466845049,-3.2627753637  | H,0,0.5365897686,-4.2472451227,3.2479583906   |
| N,0,-0.8659724379,-0.4434612487,-1.4773140424 | H,0,0.4515523896,-4.4113252073,1.4622357426   |
| O,0,-0.1152340631,0.5524227107,2.4860780304   | C,0,0.4753009246,-2.3853194247,2.1763376843   |
| C,0,-1.1651740583,1.3124341898,3.0917478502   | O,0,0.3565607361,-1.9242423249,1.0014732325   |
| H,0,-0.8109053496,2.3427699864,3.196483721    | O,0,0.3197069024,-1.7212370472,3.2365013012   |
| H,0,-1.3271050157,0.9059162257,4.0933126283   | H,0,0.0477298075,-0.4180100062,2.9316764734   |
| C,0,-2.4659993045,1.2755909236,2.2987238587   |                                               |
| H,0,-3.2427752952,1.7263575219,2.9232741213   | <sup>1</sup> K                                |
| H,0,-2.7600923156,0.2370062575,2.1394557245   | C,0,0.2099951133,1.3982079089,-2.355391766    |
| C,0,-2.412002015,2.0574500685,0.97563506      | C,0,1.5427681851,0.897430284,-2.2479873769    |
| H,0,-3.4316144263,2.2236059911,0.6216688181   | C,0,2.3046099873,1.1476540804,-1.100049456    |
| H,0,-2.0217613757,3.0451410727,1.2182562777   | C,0,1.7470113628,2.0223648741,-0.1027743388   |
| C,0,-1.5729929595,1.4635884075,-0.148543543   | C,0,0.4712466712,2.5638758834,-0.2368906523   |
| C,0,-1.7958246269,0.1124424142,-0.6226771353  | C,0,-0.3543480538,2.2165680118,-1.3574386436  |
| C,0,-2.9700404077,-0.7409223785,-0.2950585791 | H,0,-0.3869396697,1.1278595193,-3.2156774496  |
| C,0,-4.2618816576,-0.2216957343,-0.3812387399 | H,0,1.9138194911,0.2354754678,-3.0163068046   |
| C,0,-2.8007238603,-2.0908903767,0.0258893762  | H,0,2.3192213764,2.2170042093,0.7950713871    |



---

|                                               |                                               |
|-----------------------------------------------|-----------------------------------------------|
| H,0,0.0593780113,3.1783246303,0.5530908825    | O,0,1.5752849909,-3.2259399863,1.4321487932   |
| C,0,-1.741591471,2.7740638477,-1.4835007949   | N,0,0.8438423639,-0.999788697,1.1865647017    |
| H,0,-2.3452779875,2.1741799167,-2.163681302   | O,0,1.9771757181,-0.6383278345,1.9911493506   |
| H,0,-2.2468252145,2.7925939028,-0.5182449824  | C,0,1.6381873612,-0.3806376953,3.3659964456   |
| H,0,-1.7044679276,3.7968084437,-1.869685757   | H,0,1.2033417172,0.6231310066,3.4504169312    |
| C,0,3.6888266855,0.5751047789,-0.8748611938   | H,0,2.6062554526,-0.3832375556,3.8672868191   |
| H,0,3.7810143943,0.4269006235,0.2049664353    | C,0,0.6979069285,-1.4295088995,3.9367700176   |
| C,0,3.9085986515,-0.7834155848,-1.5418147599  | H,0,0.5688279114,-1.2586044553,5.0073895534   |
| H,0,4.8704515279,-1.1968942431,-1.2345742787  | H,0,1.1626549549,-2.4059910701,3.8043755464   |
| H,0,3.1288001222,-1.4933000107,-1.264350567   | C,0,-0.6620247592,-1.380350954,3.1974421229   |
| H,0,3.923813041,-0.7017538526,-2.6311362082   | H,0,-1.0767723404,-2.3895840978,3.1128707532  |
| C,0,4.755284801,1.5904601736,-1.3134526382    | H,0,-1.3919778305,-0.7834427655,3.74638418    |
| H,0,4.622485144,2.5510433604,-0.8117873422    | C,0,-0.4631470656,-0.757757099,1.850383501    |
| H,0,5.7558290737,1.2209692128,-1.0797113614   | C,0,-1.14748798,0.0170752068,1.0147613919     |
| H,0,4.7005404849,1.7640939105,-2.3909626764   | C,0,-2.5005709087,0.5403475486,1.1605418135   |
| Ru,0,0.3005345331,0.2863107608,-0.434538998   | C,0,-2.8368943033,1.4253782525,2.1919820453   |
| C,0,-0.0190336594,-3.9732239896,-0.8943709992 | C,0,-3.4837576381,0.2078365056,0.2195958979   |
| C,0,-0.7434532798,-4.1959494159,-2.0490432398 | C,0,-4.1178233452,1.9584199999,2.2826556505   |
| C,0,-1.2350585204,-3.0989591024,-2.7641529038 | H,0,-2.0805313282,1.7035447783,2.9158711975   |
| C,0,-0.9932123915,-1.7998181877,-2.3381592055 | C,0,-4.766350242,0.7266728467,0.3222823891    |
| C,0,-0.2571470547,-1.5327218283,-1.1736667842 | H,0,-3.2227530672,-0.4618095494,-0.5902490785 |
| C,0,0.2056910725,-2.6602000862,-0.4605378917  | C,0,-5.0890033583,1.6084452243,1.3510395457   |
| H,0,0.3816781095,-4.793961866,-0.3120566427   | H,0,-4.3579845858,2.6471723029,3.0835234709   |
| H,0,-0.933726584,-5.2039969932,-2.3940647002  | H,0,-5.5171200259,0.4499242541,-0.4078469955  |
| H,0,-1.8166732497,-3.266284035,-3.6640487238  | H,0,-6.0870567412,2.0218487144,1.4221772389   |
| H,0,-1.3968257589,-0.9787572315,-2.9185682335 |                                               |
| C,0,0.9553887138,-2.4345717951,0.7736299044   | <sup>3</sup> K                                |

---

|                                                |                                              |
|------------------------------------------------|----------------------------------------------|
| C,0,-0.8991184631,-2.6838925496,-1.8737346291  | C,0,0.0147103403,1.9916906695,-3.9501565501  |
| C,0,-1.9688659594,-2.1149690402,-1.1356263834  | C,0,0.1251824638,0.8421962654,-3.1759006701  |
| C,0,-1.928962526,-2.0305854689,0.267130649     | C,0,-0.2941873521,0.806768579,-1.8371966285  |
| C,0,-0.7311112414,-2.438362172,0.8936805861    | C,0,-0.8658517268,1.9852656787,-1.3136357826 |
| C,0,0.3266238086,-3.030815004,0.1629851747     | H,0,-1.4823742726,4.0028406216,-1.6763243156 |
| C,0,0.2366145126,-3.2093497685,-1.2299135076   | H,0,-0.6502454089,4.0395984214,-4.0151443966 |
| H,0,-0.9771960096,-2.7419347874,-2.9514228023  | H,0,0.362273419,1.9853014868,-4.9770219735   |
| H,0,-2.8261421033,-1.7403785502,-1.6748301323  | H,0,0.5509693264,-0.0487384617,-3.624423588  |
| H,0,-0.6276219673,-2.3147675924,1.9637571184   | C,0,-1.4485634633,2.0793625207,0.0610747757  |
| H,0,1.2187105319,-3.3493999049,0.6861549168    | O,0,-2.457017643,2.7188000122,0.2926780769   |
| C,0,1.336809458,-3.8810010273,-1.9991533443    | N,0,-0.8130972965,1.3631126089,1.093765613   |
| H,0,1.3568575094,-3.5443876424,-3.0355712298   | O,0,-1.4357698489,1.4980665455,2.347693712   |
| H,0,2.3095711605,-3.6766985725,-1.5515219163   | C,0,-1.1534133146,2.7884686387,2.9548450253  |
| H,0,1.190235398,-4.9649160323,-2.0021631139    | H,0,-1.1659272678,2.5756677734,4.0255599588  |
| C,0,-3.0517853462,-1.4556129827,1.106209733    | H,0,-1.9581407196,3.4808717019,2.7061438136  |
| H,0,-2.5761288851,-0.8291141156,1.8666015976   | C,0,0.2104753466,3.3172782548,2.5120800184   |
| C,0,-4.0229398212,-0.5692813821,0.3272313837   | H,0,0.5904011469,4.010027596,3.2650898219    |
| H,0,-4.7201762759,-0.095191795,1.0184183969    | H,0,0.1069762879,3.8835889361,1.5836834989   |
| H,0,-3.5062919084,0.2260830643,-0.2082379585   | C,0,1.1785812556,2.1510949886,2.2942159062   |
| H,0,-4.6121679308,-1.1493855413,-0.3877699735  | H,0,2.159658515,2.5002962959,1.9681618299    |
| C,0,-3.7978703046,-2.5946654641,1.8217402272   | H,0,1.3330026062,1.6297469737,3.2449403896   |
| H,0,-3.1206311406,-3.2046663316,2.422168235    | C,0,0.6059769758,1.1974804065,1.2649293944   |
| H,0,-4.5638058003,-2.1860187848,2.4834121194   | C,0,1.2161899788,0.2494851456,0.5452203454   |
| H,0,-4.2895615076,-3.2493495715,1.0978009963   | C,0,2.6637168014,-0.0016534673,0.5822896215  |
| Ru,0,-0.0318263297,-0.8200992226,-0.6487818427 | C,0,3.3150475224,-0.3610479885,1.769468943   |
| C,0,-1.0061813838,3.1302220153,-2.1047011767   | C,0,3.4242306965,0.0593546386,-0.5945383487  |
| C,0,-0.5523774096,3.1444622269,-3.4142191665   | C,0,4.6752840324,-0.6466880137,1.7814679225  |

---

|                                              |                                               |
|----------------------------------------------|-----------------------------------------------|
| H,0,2.7413303365,-0.4251455335,2.6856449019  | H,0,2.8113694108,0.7577910126,-2.1569208492   |
| C,0,4.7850516074,-0.2137880589,-0.5798312719 | H,0,2.5491909278,2.4867861798,-1.9661107514   |
| H,0,2.93176791,0.3343483713,-1.5192596506    | C,0,4.5223817645,2.9622145694,-0.0670886916   |
| C,0,5.4175945608,-0.5723645516,0.6076855463  | H,0,4.9879756257,2.9048560386,0.9184984071    |
| H,0,5.1573009304,-0.9259890595,2.7106565957  | H,0,5.2871180688,3.2469779879,-0.7925427087   |
| H,0,5.3553433393,-0.1484529179,-1.4985302058 | H,0,3.7731899183,3.7572707297,-0.0404410567   |
| H,0,6.4778168495,-0.7916160808,0.6173227138  | Ru,0,1.0088755907,-0.2791037376,0.6210777462  |
|                                              | C,0,-0.556783716,2.8537623489,-2.0742719962   |
| <sup>1</sup> L                               | C,0,-1.1722688362,3.9839306282,-1.5554165847  |
| C,0,0.6639548089,1.5550238475,1.7028220437   | C,0,-2.0510513575,3.8530450068,-0.4826811202  |
| C,0,1.5653567091,1.8249895896,0.6469334484   | C,0,-2.2966573088,2.6010387153,0.0628029695   |
| C,0,2.8660643635,1.2193724454,0.5835701937   | C,0,-1.6389231799,1.4574534258,-0.4053341982  |
| C,0,3.1374282751,0.2391137539,1.5284046604   | C,0,-0.7625207539,1.6025264406,-1.4973224372  |
| C,0,2.1787903202,-0.1182425474,2.529553541   | H,0,0.0817603226,2.9254766923,-2.9457835187   |
| C,0,0.9647848299,0.5668625243,2.6884487935   | H,0,-0.9903127469,4.9551944957,-1.9979832833  |
| H,0,-0.2823646594,2.0730285683,1.7333722716  | H,0,-2.5560221447,4.7238946165,-0.083220027   |
| H,0,1.2763819475,2.5516863395,-0.096140616   | H,0,-3.0082416983,2.4970501324,0.8731887613   |
| H,0,4.0622599905,-0.3206540792,1.4679486286  | C,0,-0.2108305098,0.3811872831,-2.1788266977  |
| H,0,2.3902386555,-0.9634174083,3.1711327197  | O,0,-0.5588171322,0.1377596259,-3.3317751284  |
| C,0,-0.0013246419,0.2559884782,3.7916251646  | N,0,0.5765654662,-0.4115891573,-1.4074460316  |
| H,0,-1.0264015065,0.2972892444,3.4216331972  | O,0,0.6125781754,-1.7457471615,-1.9329216774  |
| H,0,0.1770614397,-0.7385998673,4.200695427   | C,0,-0.6500075921,-2.4616335321,-1.810523636  |
| H,0,0.0970558253,0.9810382522,4.6040834895   | H,0,-0.5680816866,-3.2372945622,-2.5737494044 |
| C,0,3.8779393238,1.6241080409,-0.4642547637  | H,0,-1.4490559286,-1.7864297983,-2.1070873938 |
| H,0,4.6601340828,0.8585317815,-0.4615541127  | C,0,-0.9166704888,-3.1179319004,-0.4571981256 |
| C,0,3.2939581036,1.6931998637,-1.8791206     | H,0,-0.0688634164,-3.7537547339,-0.2082349859 |
| H,0,4.0873399676,1.9091739039,-2.5968443545  | H,0,-1.7550895936,-3.7979323312,-0.6359262066 |

---

|                                               |                                               |
|-----------------------------------------------|-----------------------------------------------|
| C,0,-1.2860256783,-2.2217427567,0.773140466   | C,0,-3.0583468607,-0.0240348846,-1.4464956146 |
| H,0,-2.3471216131,-2.3597937829,0.9806683475  | C,0,-2.7123324906,-0.8666579019,-0.3856795819 |
| H,0,-0.7470067928,-2.6060865516,1.6407660581  | C,0,-1.548243885,-1.6332406753,-0.5287626224  |
| C,0,-0.9876167844,-0.7539577063,0.5696296855  | C,0,-0.7757428693,-1.5737833151,-1.6933261346 |
| C,0,-1.9447173025,0.1165910541,0.181912132    | C,0,-1.1306440306,-0.7359313122,-2.7431299718 |
| C,0,-3.4018648558,-0.2155400747,0.1731512059  | H,0,-2.5817796288,0.7048138406,-3.3959440565  |
| C,0,-4.0918185352,-0.5233600357,1.3488931907  | H,0,-3.9413656783,0.5968586511,-1.3734450645  |
| C,0,-4.1181603644,-0.1992822927,-1.0290745795 | H,0,-1.2719850132,-2.3235046997,0.2585179565  |
| C,0,-5.4485766543,-0.8270874704,1.3254182036  | H,0,0.1187456801,-2.1799128802,-1.7655110558  |
| H,0,-3.5519852698,-0.5221286328,2.2881429768  | C,0,-0.2905971573,-0.629239964,-3.9870120362  |
| C,0,-5.4725554144,-0.5052995233,-1.0559592502 | H,0,-0.911720597,-0.6136673703,-4.8847780376  |
| H,0,-3.6012473577,0.053830729,-1.9472222822   | H,0,0.2949914267,0.2946518322,-3.981791798    |
| C,0,-6.1439961089,-0.8219464448,0.1215859974  | H,0,0.4083978046,-1.4611425746,-4.0675380725  |
| H,0,-5.963636017,-1.0621631908,2.2490376021   | C,0,-3.58857586,-1.0205123277,0.8432639928    |
| H,0,-6.0060347767,-0.4962383436,-1.9985565729 | H,0,-2.9687516946,-1.486096496,1.6125070406   |
| H,0,-7.2008272699,-1.0567471325,0.1010490345  | C,0,-4.0856920081,0.3168809879,1.402952553    |
| C,0,3.4434469761,-4.1041632086,0.780423811    | H,0,-4.6182158816,0.1535334688,2.3420907717   |
| H,0,3.2440039721,-5.0942179237,0.3678053506   | H,0,-3.2607117264,1.0039350663,1.5921818849   |
| H,0,4.4761875442,-3.8538749441,0.5320155401   | H,0,-4.7779768552,0.8097748524,0.7167715172   |
| H,0,3.306454094,-4.1131305678,1.8578644629    | C,0,-4.7660878889,-1.9599938631,0.5386472056  |
| C,0,2.5238744078,-3.1035452681,0.1443174609   | H,0,-4.4156631784,-2.9312101076,0.1841950496  |
| O,0,1.7191629333,-2.4515578694,0.8111612903   | H,0,-5.3714293725,-2.1201778424,1.4339441372  |
| O,0,2.6564303714,-3.0006955956,-1.1501515295  | H,0,-5.4112758797,-1.5342600437,-0.2339637163 |
| H,0,1.8817640004,-2.4391321134,-1.5253218574  | Ru,0,-0.173434954,0.4133388976,0.8967784705   |
|                                               | C,0,1.82204922,4.4684654293,-0.5841877822     |
| <sup>1</sup> M                                | C,0,3.1120121939,4.6403015299,-1.0566936887   |
| C,0,-2.2861049807,0.0368611661,-2.5945373946  | C,0,3.9720350075,3.5474505336,-1.1014997333   |

---

|                                              |                                               |
|----------------------------------------------|-----------------------------------------------|
| C,0,3.5325188677,2.2992580685,-0.6880903329  | C,0,3.0536805427,-2.8040425709,-0.3530448332  |
| C,0,2.2211694008,2.0962611987,-0.2394393809  | H,0,2.4910995788,-1.6824094249,1.3744599069   |
| C,0,1.3596281409,3.211306798,-0.1870480922   | C,0,3.2325492315,-2.8006406716,-1.7319327933  |
| H,0,1.1392786877,5.3043710895,-0.5153135482  | H,0,3.1102374742,-1.6170856492,-3.5214397726  |
| H,0,3.4469299839,5.6161877674,-1.3838419015  | H,0,3.2420078993,-3.7053136399,0.2168170811   |
| H,0,4.9894362178,3.6672449728,-1.4526299997  | H,0,3.5584471523,-3.6967444066,-2.2439304059  |
| H,0,4.2160132855,1.4612759645,-0.7093501875  |                                               |
| C,0,-0.0518370438,3.1584901253,0.3434946869  | <sup>3</sup> M                                |
| O,0,-0.5706987713,4.1454947052,0.8312814512  | C,0,-2.1243549415,1.1551916995,2.7737990553   |
| N,0,-0.7384195731,1.9540105947,0.250042289   | C,0,-3.0644700116,0.3638653578,2.1307977976   |
| O,0,-0.6517590639,-0.8544082663,2.3058360898 | C,0,-3.2281956894,0.4102690801,0.7459337626   |
| C,0,-0.005311172,-0.9768076265,3.5502983672  | C,0,-2.4135801301,1.3015649809,0.0325706819   |
| H,0,0.6932344477,-1.8276131889,3.5088640713  | C,0,-1.4741380107,2.1091655766,0.685675663    |
| H,0,-0.7585117043,-1.2160301744,4.3102644348 | C,0,-1.3073352465,2.0368153828,2.0677704107   |
| C,0,0.7590553749,0.2739570379,3.999506061    | H,0,-2.0056883826,1.0689153187,3.8472137968   |
| H,0,1.1518651247,0.1077845071,5.0057430081   | H,0,-3.6693068202,-0.3131627081,2.7196260589  |
| H,0,0.0588534955,1.1113077307,4.0535776543   | H,0,-2.5661109527,1.4184708539,-1.0349101303  |
| C,0,1.9111865638,0.6430194768,3.0493754018   | H,0,-0.8714372772,2.7960620042,0.1053098275   |
| H,0,2.3375635205,1.6201850644,3.3075227454   | C,0,-0.2370674073,2.8268868429,2.7660785206   |
| H,0,2.7392965947,-0.0733936389,3.1281036511  | H,0,-0.5446127362,3.1123940109,3.7730100789   |
| C,0,1.437588202,0.6817130364,1.6586731415    | H,0,0.6715415645,2.2248816634,2.8608417998    |
| C,0,1.8386991302,0.7392249278,0.2798193983   | H,0,0.0219584602,3.7289491494,2.2117590484    |
| C,0,2.3782708695,-0.4713786176,-0.4041070758 | C,0,-4.2727755349,-0.4211900939,0.0291485336  |
| C,0,2.5609601179,-0.4850499831,-1.7925799759 | H,0,-4.0270131691,-0.3868671343,-1.035072427  |
| C,0,2.6370591046,-1.6532547708,0.3026441274  | C,0,-4.2490270276,-1.8950999994,0.4484748453  |
| C,0,2.985112035,-1.6318038335,-2.4459363233  | H,0,-4.9666641552,-2.4642155946,-0.1466224483 |
| H,0,2.3463532026,0.4074844403,-2.3637885521  | H,0,-3.2602918951,-2.3240283568,0.2914455313  |

---

|                                                |                                               |
|------------------------------------------------|-----------------------------------------------|
| H,0,-4.5222533508,-2.0201403947,1.4983557838   | H,0,2.1469634407,-2.2610922477,-2.5068389277  |
| C,0,-5.6695146221,0.1892681785,0.2232174807    | H,0,1.3041324853,-1.2054150987,-3.6203284414  |
| H,0,-5.6998935288,1.2269353397,-0.1149072674   | C,0,0.9470295408,-0.7849957643,-1.6108047591  |
| H,0,-6.4174907856,-0.3760326378,-0.3375123607  | C,0,1.6176586657,0.12284088,-0.7554396297     |
| H,0,-5.9553478949,0.1731680355,1.2777708352    | C,0,1.539403459,1.589270967,-0.9770661886     |
| Ru,0,-0.4045990877,-0.5187853024,-0.3974307191 | C,0,2.0446939225,2.4729572727,-0.0143215654   |
| C,0,3.6623687479,-1.5221804107,2.0115341025    | C,0,0.9401403787,2.1293589665,-2.1260788105   |
| C,0,4.94029255892,-1.4086278355,1.4889876417   | C,0,1.930350636,3.8441795174,-0.1814754139    |
| C,0,5.1324514299,-0.7821585038,0.2610898085    | H,0,2.5127175977,2.0748593517,0.8755336595    |
| C,0,4.0403657127,-0.2804339717,-0.4312347095   | C,0,0.8211688403,3.5020562583,-2.2867744306   |
| C,0,2.745285196,-0.4026352836,0.0798903212     | H,0,0.5576276086,1.4653374708,-2.8905940171   |
| C,0,2.5529170014,-1.025173149,1.3228058192     | C,0,1.3117450963,4.3674600525,-1.3135743783   |
| H,0,3.4892719224,-1.9866259363,2.9727419956    | H,0,2.3178621725,4.5090661486,0.5800484069    |
| H,0,5.7874431151,-1.7992326874,2.039455715     | H,0,0.351198886,3.8983363473,-3.1780591709    |
| H,0,6.1273231539,-0.6838090902,-0.1548825875   | H,0,1.2192593092,5.438416552,-1.4394380423    |
| H,0,4.1840038847,0.2174102061,-1.3827739348    |                                               |
| C,0,1.2011946994,-1.1780797405,1.9942290558    | <sup>1</sup> N                                |
| O,0,1.1468879623,-1.5647816157,3.1627044651    | C,0,-3.4644203072,-0.628292257,-1.4395147868  |
| N,0,0.0708908303,-0.8833324433,1.3117650919    | C,0,-2.6233622421,0.4679656164,-1.8160833856  |
| O,0,-1.6470550533,-1.5112696446,-1.5608734368  | C,0,-2.6179851711,1.6765694642,-1.0976201582  |
| C,0,-1.3420242385,-2.1263430052,-2.7836956253  | C,0,-3.3021117859,1.661610572,0.1434975236    |
| H,0,-1.4048992139,-1.3913664609,-3.6020759237  | C,0,-3.9683445254,0.5086983919,0.6110244936   |
| H,0,-2.0978339529,-2.8967743784,-2.9778571263  | C,0,-4.1461730061,-0.6406817755,-0.2345020467 |
| C,0,0.0433478942,-2.7836450166,-2.8024196135   | H,0,-3.462824015,-1.5167163423,-2.0572136975  |
| H,0,0.1611527957,-3.3616702898,-3.7225250825   | H,0,-2.0200625894,0.3782306051,-2.7073477922  |
| H,0,0.0978206597,-3.4823689925,-1.9635696074   | H,0,-3.2128395121,2.5179374646,0.7980651775   |
| C,0,1.1851224573,-1.7640116773,-2.6808368194   | H,0,-4.4056893768,0.5066475537,1.5998136125   |

---

|                                              |                                               |
|----------------------------------------------|-----------------------------------------------|
| C,0,-4.8730850489,-1.836031148,0.2870879134  | O,0,-2.0464843369,-1.5002012433,1.7599595701  |
| H,0,-4.9858274368,-2.602765102,-0.4777291881 | C,0,-1.3360295708,-1.5160003365,2.9681823242  |
| H,0,-4.2880321803,-2.2462878303,1.1175718837 | H,0,-1.7831146668,-2.333419323,3.5542651128   |
| H,0,-5.8598503935,-1.5619294763,0.6641284711 | H,0,-1.4854384759,-0.5904782661,3.5429685097  |
| C,0,-1.9325459079,2.9408437368,-1.5611196591 | C,0,0.1695509185,-1.7516266131,2.8292157925   |
| H,0,-1.6228913544,3.4689747506,-0.6557974109 | H,0,0.6176398354,-1.8237998841,3.8245841854   |
| C,0,-0.6926198916,2.7000310211,-2.4206831661 | H,0,0.6063120819,-0.8786600408,2.3510374367   |
| H,0,-0.1882587134,3.6503729493,-2.5998100335 | C,0,0.5144787285,-3.0040019593,1.9962205316   |
| H,0,0.0044287785,2.0191353804,-1.9369496243  | H,0,0.5167319403,-3.9001792539,2.6235523945   |
| H,0,-0.9524578069,2.279852554,-3.3955517269  | H,0,-0.2665494315,-3.1322282219,1.2426903497  |
| C,0,-2.9628089806,3.8247894335,-2.2865123128 | C,0,1.7897413645,-2.8535138405,1.3112395546   |
| H,0,-3.8291972091,4.0359482985,-1.6565651652 | C,0,2.8076093543,-2.611288175,0.7111460615    |
| H,0,-2.5056480646,4.7759727827,-2.5635689244 | C,0,3.9752687838,-2.294337773,-0.0419219257   |
| H,0,-3.3150394602,3.3391253799,-3.199880071  | C,0,3.8858105639,-1.443760621,-1.1559585509   |
| Ru,0,-1.860926379,-0.0942867694,0.3243886647 | C,0,5.2297290249,-2.8134030574,0.3109827017   |
| C,0,1.4234050964,3.7868431227,1.1288250797   | C,0,5.0211113549,-1.126186373,-1.8883936716   |
| C,0,2.7206385481,4.1262618466,0.7746252651   | H,0,2.9271711977,-1.0265517323,-1.4356134212  |
| C,0,3.6068944016,3.138920217,0.3520564544    | C,0,6.3591038867,-2.4905364841,-0.4277170131  |
| C,0,3.1913047982,1.8135582486,0.2798462853   | H,0,5.3058797256,-3.4679837987,1.1692758899   |
| C,0,1.0013386196,2.4570813286,1.0569379753   | C,0,6.2609545418,-1.646266047,-1.5297048012   |
| H,0,0.7202085532,4.5360258445,1.4665720735   | H,0,4.9349935403,-0.4655792522,-2.7422791254  |
| H,0,3.0430505643,5.1584656746,0.8315176795   | H,0,7.3205733284,-2.8982003529,-0.1410667576  |
| H,0,4.6216525534,3.4021310276,0.0799570379   | H,0,7.1441340619,-1.3957309247,-2.1036802288  |
| H,0,3.8772126014,1.0437862306,-0.0466759379  | C,0,0.0966521733,-1.3683421086,-1.4788713516  |
| C,0,-0.4167698051,2.1605135651,1.4328056657  | C,0,0.5639496398,-2.6715407095,-2.092264903   |
| O,0,-1.1943455923,3.0390509396,1.816950396   | H,0,-0.2933709543,-3.2713437013,-2.3992851067 |
| N,0,-0.7688349216,0.8494082792,1.4146472836  | H,0,1.2112060301,-2.4690539349,-2.9417921069  |

---

|                                               |                                               |
|-----------------------------------------------|-----------------------------------------------|
| H,0,1.1137625125,-3.2375958095,-1.3401843946  | H,0,-2.18751128,-2.0349231755,-2.0807976816   |
| O,0,-0.8081220369,-1.5638759281,-0.5463150998 | C,0,-0.7156212484,-0.5295591211,-1.7997955067 |
| O,0,0.5283837192,-0.2819765738,-1.8248779471  | C,0,-1.46563351,0.2661013797,-0.9948369316    |
| C,0,1.8917878018,1.4702856083,0.6279384781    | C,0,-2.8117444038,-0.1614877381,-0.5224701901 |
| H,0,1.5743445262,0.4407484023,0.5554755033    | C,0,-2.9371277898,-0.9911573524,0.5934516163  |
|                                               | C,0,-3.9711094411,0.2717592836,-1.1680871488  |
| <b>2a'</b>                                    | C,0,-4.1902871929,-1.3896638879,1.0452212617  |
| C,0,0.9192930751,3.1455558206,-0.5512714479   | H,0,-2.0367664401,-1.3231468495,1.0939147131  |
| C,0,0.2005667042,3.9840684525,0.2763811431    | C,0,-5.2257550715,-0.1249972524,-0.7183373238 |
| C,0,-1.0795821727,3.6050360514,0.6968487078   | H,0,-3.8833442478,0.9225498135,-2.0294373893  |
| C,0,-1.6299973929,2.4057185177,0.291508696    | C,0,-5.3385216789,-0.9581641521,0.3895739461  |
| C,0,-0.9187050101,1.5335800002,-0.5566498482  | H,0,-4.2711793102,-2.0357551591,1.9108094474  |
| C,0,0.3749128571,1.92726056,-0.9701302577     | H,0,-6.1150686759,0.2158782225,-1.2337501288  |
| H,0,1.9125558785,3.4018326501,-0.8948673558   | H,0,-6.314942094,-1.2677133891,0.7404196094   |
| H,0,0.6229600934,4.9265357226,0.60001012      | O,0,0.2266387388,-2.3997690198,0.349168411    |
| H,0,-1.6466185994,4.2580560692,1.349081528    | H,0,0.2644795835,-2.6695372817,1.2721443034   |
| H,0,-2.6188607962,2.1264326456,0.6279718791   | N,0,0.5357181129,-0.115112271,-2.2000578427   |
| C,0,1.1729692555,1.0612293069,-1.8448190603   | H,0,1.0874178695,-0.7165829734,-2.7939558657  |
| O,0,2.297448462,1.3070844879,-2.2580212321    |                                               |
| C,0,-0.4201147331,-3.4172753474,-0.4140275595 | <b>3a'</b>                                    |
| H,0,-1.4788592949,-3.4983469818,-0.1338565551 | C,0,0.8388413459,-3.8585221657,-1.1477263217  |
| H,0,0.0523252167,-4.3905933827,-0.2345792193  | C,0,1.277754081,-4.6817926661,-0.1317198739   |
| C,0,-0.3031542965,-3.0714476916,-1.8885512019 | C,0,0.7742812178,-4.501115133,1.1606908607    |
| H,0,-0.6280212833,-3.9420969357,-2.4647875456 | C,0,-0.1488097178,-3.5098912071,1.426941154   |
| H,0,0.7546517626,-2.9205718684,-2.1218236538  | C,0,-0.6165654346,-2.652085217,0.4097471201   |
| C,0,-1.1446683358,-1.8643598035,-2.3433207793 | C,0,-0.097512779,-2.8516658471,-0.8914282208  |
| H,0,-1.1028911006,-1.8124440894,-3.4373534767 | H,0,1.2005504906,-3.9659229953,-2.1615500577  |



---

|                                               |                                               |
|-----------------------------------------------|-----------------------------------------------|
| H,0,2.0027371018,-5.4602007633,-0.3310597936  | N,0,-1.4811794726,-1.0658122265,-1.6569738415 |
| H,0,1.1110109118,-5.144423824,1.964503155     | H,0,-1.8252000126,-0.5048196384,-2.4227121906 |
| H,0,-0.5164899472,-3.3994383296,2.4366611377  | O,0,0.092298016,0.8832967325,1.3162983005     |
| C,0,-0.5356957474,-2.0099765837,-2.0100460544 | H,0,0.3214771947,1.792806237,1.101153556      |
| O,0,-0.1472634033,-2.100273039,-3.1664643617  |                                               |
| C,0,-0.6978336499,0.8800496051,2.507315201    | <b><sup>1</sup>TS1</b>                        |
| H,0,-1.6458929534,1.4090878675,2.3407222191   | C,0,-1.9162277071,-2.0920422558,-0.980890301  |
| H,0,-0.1628108031,1.3945342986,3.3151796279   | C,0,-2.9398270684,-1.1167593663,-0.7623490812 |
| C,0,-0.9698525602,-0.5564130846,2.9268682784  | C,0,-2.9997281251,-0.3536266974,0.4199239163  |
| H,0,-1.3262858044,-0.5368511328,3.9614993119  | C,0,-1.9766936578,-0.5923865824,1.3988655304  |
| H,0,-0.0202669637,-1.0959852466,2.9263541007  | C,0,-0.9663120593,-1.5360756545,1.1864965648  |
| C,0,-2.0192432584,-1.2961530398,2.0740803177  | C,0,-0.9068858678,-2.2966345367,-0.0301095682 |
| H,0,-2.2869471502,-2.22664913,2.5816428217    | H,0,-1.877724505,-2.6174435654,-1.9255742004  |
| H,0,-2.9273008688,-0.6956843102,2.0656476372  | H,0,-3.6395220754,-0.9203838505,-1.5607900764 |
| C,0,-1.5845728448,-1.6005360376,0.6611043355  | H,0,-1.9353037247,0.0423277529,2.2734326544   |
| C,0,-1.9960082057,-0.8476312499,-0.3930193655 | H,0,-0.1560053235,-1.6241924761,1.8984855976  |
| C,0,-2.9491835685,0.2878925057,-0.3271322934  | C,0,0.2433711811,-3.2283451415,-0.2650339368  |
| C,0,-2.5196829633,1.5729207224,-0.6690698333  | H,0,0.2905274004,-3.5460114401,-1.3060775382  |
| C,0,-4.2837283864,0.0963852612,0.035104441    | H,0,1.1802863709,-2.7317918153,-0.0100898208  |
| C,0,-3.4009238194,2.6460117333,-0.6277541803  | H,0,0.1494822053,-4.1173725826,0.3637786466   |
| H,0,-1.4841188265,1.72519627,-0.9440735073    | C,0,-4.0468706813,0.7041011656,0.700471673    |
| C,0,-5.164966091,1.170007499,0.0763482003     | H,0,-3.5020741277,1.5751388676,1.0771731152   |
| H,0,-4.6279698687,-0.9006949358,0.2783092952  | C,0,-4.8380750121,1.1397867929,-0.5312195158  |
| C,0,-4.7253968481,2.448025059,-0.2513840316   | H,0,-5.4854009771,1.9783241154,-0.2726626422  |
| H,0,-3.0530788785,3.6381495317,-0.88692571    | H,0,-4.1844299744,1.4640673844,-1.3393109581  |
| H,0,-6.1976253635,1.006544953,0.3575468035    | H,0,-5.4768918885,0.334032065,-0.9026091545   |
| H,0,-5.4124696988,3.2839948169,-0.2198026977  | C,0,-4.9907338372,0.211498853,1.8094620069    |

---

|                                                |                                              |
|------------------------------------------------|----------------------------------------------|
| H,0,-4.445935448,-0.0601089135,2.7153178923    | C,0,3.5067171414,-0.3959077442,2.37303199    |
| H,0,-5.7056244509,0.9937365571,2.070015965     | C,0,4.5810457873,-1.3113507595,2.1793059712  |
| H,0,-5.5532725011,-0.6650629564,1.4780730436   | C,0,4.4826936681,-2.3160939568,1.2042864554  |
| Ru,0,-1.0096460105,-0.1026639901,-0.5109463245 | C,0,5.7540215303,-1.2292295584,2.9434082457  |
| C,0,-2.5662206772,2.8123139828,-3.2282827009   | C,0,5.5250500427,-3.2087493662,1.002661489   |
| C,0,-2.9387704298,2.1497313821,-4.3923630628   | H,0,3.5819134455,-2.3806717354,0.6086151481  |
| C,0,-2.5164345762,0.8404276262,-4.6194491793   | C,0,6.7929487906,-2.1256818451,2.7368489516  |
| C,0,-1.7118191019,0.2016029217,-3.6856096511   | H,0,5.8386896251,-0.4567920022,3.6963295476  |
| C,0,-1.7766613751,2.1633911029,-2.2888964236   | C,0,6.6841681829,-3.117931134,1.767425331    |
| H,0,-2.8963485665,3.8212971654,-3.0156586702   | H,0,5.4337520035,-3.9781094676,0.2460100737  |
| H,0,-3.5595365119,2.651066947,-5.1246784528    | H,0,7.6924458141,-2.0491365634,3.3347469685  |
| H,0,-2.8010098865,0.3298662964,-5.5314880999   | H,0,7.4969725026,-3.8150465255,1.6086301802  |
| H,0,-1.3407343322,-0.7962740503,-3.8899767055  | C,0,1.7943576376,0.2938537625,-1.4725968385  |
| C,0,-1.5109693171,2.8135095331,-0.9638434506   | C,0,3.2926717037,0.2127287808,-1.3437415555  |
| O,0,-1.8188681265,3.9735576023,-0.710113665    | H,0,3.588493067,0.3027863898,-0.301540973    |
| N,0,-0.9322637312,1.9246123376,-0.1122322552   | H,0,3.6198073681,-0.7621807474,-1.7120883691 |
| O,0,-0.951461972,2.3405862118,1.2378418723     | H,0,3.7624124518,0.9801912283,-1.9550425663  |
| C,0,0.1558029864,3.1892906126,1.5681685048     | O,0,1.1024309373,-0.0679513562,-0.4747610305 |
| H,0,-0.1054970823,3.5747019522,2.5575270367    | O,0,1.2939745802,0.6915337685,-2.5549560054  |
| H,0,0.1911209586,4.0284459443,0.8715946602     | C,0,-1.328022975,0.8464062243,-2.5003575589  |
| C,0,1.4796667231,2.4403047717,1.6063522523     | H,0,-0.0418228619,0.6649082883,-2.3577523876 |
| H,0,2.275120148,3.133505265,1.8923078671       |                                              |
| H,0,1.7079593268,2.0738582305,0.6082759227     | <b><sup>3</sup>TS1</b>                       |
| C,0,1.4316913411,1.2534245589,2.5836056917     | C,0,0.4860419069,0.3573904756,2.7460507806   |
| H,0,1.3317365219,1.6241097548,3.6093022583     | C,0,1.420227029,-0.6403533599,2.3819878468   |
| H,0,0.5275083488,0.6814852851,2.3666866204     | C,0,1.0043525653,-1.7474846675,1.594217424   |
| C,0,2.5765224142,0.3612157063,2.490464565      | C,0,-0.3631583787,-1.8016120583,1.2192318471 |

---

|                                              |                                               |
|----------------------------------------------|-----------------------------------------------|
| C,0,-1.2983694844,-0.8678973782,1.6850422248 | H,0,6.0825748383,2.9410645354,0.2111286296    |
| C,0,-0.8804672634,0.2432072196,2.4316543737  | H,0,4.3903142747,3.8778606454,1.7542941258    |
| H,0,0.8323293269,1.2122498545,3.3116570356   | H,0,2.0522034648,3.0979961366,1.6530418608    |
| H,0,2.4417220124,-0.5551453209,2.7214619799  | C,0,3.0084343052,0.0114913874,-1.6628705464   |
| H,0,-0.7013665458,-2.6259783105,0.6070333902 | O,0,3.7087260095,-0.4455718657,-2.5493762514  |
| H,0,-2.3301098422,-0.9536565682,1.3767123116 | N,0,1.7716551266,-0.4913949044,-1.2858919972  |
| C,0,-1.8440489094,1.3357241392,2.7876595184  | O,0,1.4587444472,-1.7195362747,-1.8906829558  |
| H,0,-1.5367064016,1.8643616281,3.6905200374  | C,0,0.8356176292,-1.5360700252,-3.1754139127  |
| H,0,-1.8932772813,2.0586269243,1.9692633407  | H,0,0.9347750126,-2.5117335725,-3.6576157144  |
| H,0,-2.8494466427,0.9418952316,2.9339044273  | H,0,1.40991758,-0.811132279,-3.7533690591     |
| C,0,1.9263262943,-2.891006101,1.2128386171   | C,0,-0.621085391,-1.1262889852,-3.0370731886  |
| H,0,1.6433895837,-3.1836077821,0.1983765702  | H,0,-1.0277730745,-0.8721910319,-4.0191315725 |
| C,0,3.4096293732,-2.5197491361,1.188368321   | H,0,-0.6762632779,-0.2274128488,-2.4243958551 |
| H,0,3.9902633743,-3.3549866771,0.7954477045  | C,0,-1.4665302309,-2.24018797,-2.3866675394   |
| H,0,3.5987398932,-1.6556661589,0.5528285433  | H,0,-1.7215219127,-3.0028563243,-3.1286642345 |
| H,0,3.788122362,-2.3032630367,2.19035882     | H,0,-0.8498938431,-2.7386418982,-1.6332243931 |
| C,0,1.6755652514,-4.0820164496,2.15232048    | C,0,-2.6670234247,-1.7302779948,-1.7436511417 |
| H,0,0.6289775011,-4.3910159409,2.1386173514  | C,0,-3.6000050114,-1.2240898056,-1.1741434981 |
| H,0,2.2862584919,-4.9356605118,1.8525302945  | C,0,-4.6296724623,-0.5522221736,-0.4545349651 |
| H,0,1.9371844448,-3.8242847575,3.1817186662  | C,0,-4.3450231555,0.6775685866,0.1604326818   |
| Ru,0,0.8737154706,0.1265837779,0.3420663222  | C,0,-5.9182335627,-1.0901305907,-0.3314394694 |
| C,0,4.7003918406,1.6036769291,-0.7442520215  | C,0,-5.3267916245,1.3450627951,0.8780111644   |
| C,0,5.0609425326,2.584172751,0.1734143941    | H,0,-3.3468438607,1.0834529894,0.0643693003   |
| C,0,4.1080733666,3.1070857478,1.0470923252   | C,0,-6.8940531146,-0.4142877414,0.3878874785  |
| C,0,2.7958301386,2.6543243431,1.0006083721   | H,0,-6.1430469242,-2.0375351328,-0.8034594078 |
| C,0,3.3889714762,1.1510216023,-0.7794564352  | C,0,-6.6038646701,0.8039471055,0.9951006381   |
| H,0,5.4226950206,1.1668047402,-1.4223154437  | H,0,-5.0948694178,2.2928111034,1.3485583105   |

---

|                                              |                                               |
|----------------------------------------------|-----------------------------------------------|
| H,0,-7.885816714,-0.8399668322,0.4752072194  | C,0,-3.9047107803,-0.1203531168,0.659526056   |
| H,0,-7.3682730753,1.3277582921,1.5548386029  | H,0,-3.8987148671,-0.4929833847,-0.3681333177 |
| C,0,-0.7327586855,2.3325038267,-1.0630710398 | C,0,-3.7075689355,-1.3228053254,1.5828678001  |
| C,0,-1.9092968083,3.0326560303,-1.7002702013 | H,0,-4.4720704587,-2.0734835715,1.377826619   |
| H,0,-2.5304862754,2.3034308917,-2.2191064401 | H,0,-2.7321253672,-1.7815302884,1.4236055301  |
| H,0,-2.5191460845,3.4828544795,-0.9142245435 | H,0,-3.7993480723,-1.045572294,2.6360594776   |
| H,0,-1.5753069962,3.8105921812,-2.381893792  | C,0,-5.2513644114,0.5731260579,0.918145458    |
| O,0,-0.9510091654,1.2564652181,-0.4438657801 | H,0,-5.4112314169,1.4073689847,0.2322306945   |
| O,0,0.4114380844,2.8583723775,-1.1744861462  | H,0,-6.0728225763,-0.1339054133,0.7887047798  |
| C,0,2.405265376,1.6632324279,0.0879420552    | H,0,-5.2971698199,0.9620048707,1.9384960619   |
| H,0,1.2780321083,2.0923430924,-0.5095828416  | Ru,0,-0.6451186797,0.6001720795,0.0629288033  |
|                                              | C,0,0.7318893193,-3.2012778308,1.4159611089   |
| <b>'TS2</b>                                  | C,0,1.4363328818,-2.9658232613,2.5899522742   |
| C,0,-0.8834056796,1.9617766503,1.8332105465  | C,0,1.7771900216,-1.6573437786,2.9396515466   |
| C,0,-2.0010815603,1.0936130821,1.8844883164  | C,0,1.4572659172,-0.6024242353,2.1019983593   |
| C,0,-2.7846935359,0.8954012439,0.735876093   | C,0,0.7559750431,-0.8184667641,0.9024715444   |
| C,0,-2.5063007005,1.7022742936,-0.4166831684 | C,0,0.3646124661,-2.1409932176,0.5969554703   |
| C,0,-1.4625110707,2.6471944203,-0.4113707683 | H,0,0.4275459525,-4.1990565833,1.1243472278   |
| C,0,-0.6093972937,2.7869459634,0.7114700611  | H,0,1.7102818814,-3.7898534659,3.2363877045   |
| H,0,-0.2157688027,2.0039654872,2.6844588801  | H,0,2.3139632841,-1.4658949948,3.8610360528   |
| H,0,-2.1573619183,0.4868861385,2.7633671846  | H,0,1.7840783519,0.399388877,2.3510550954     |
| H,0,-3.0875283548,1.5490912324,-1.315575337  | C,0,-0.5149347959,-2.3579379962,-0.5881561144 |
| H,0,-1.2662207478,3.2286962344,-1.3038700464 | O,0,-0.6370672909,-3.4262622977,-1.1883748266 |
| C,0,0.5331212509,3.7602894144,0.714985838    | N,0,-1.1298541086,-1.1880715804,-0.8655539697 |
| H,0,1.3570471493,3.3963700335,1.3292812054   | O,0,-1.9473814269,-1.1146443614,-1.9990025089 |
| H,0,0.9111555716,3.9228130959,-0.2948790251  | C,0,-1.309533704,-1.4165766876,-3.2598696788  |
| H,0,0.2171414198,4.7283590846,1.1137342964   | H,0,-1.9384245894,-0.8855932798,-3.9794442786 |

---

|                                               |                                               |
|-----------------------------------------------|-----------------------------------------------|
| H,0,-1.3821019276,-2.4911940134,-3.438655028  | C,0,-0.881456384,-2.5029604129,-1.4805518446  |
| C,0,0.148678396,-0.9973449301,-3.4214239457   | H,0,-1.3063048239,-1.4631811544,-3.3050518562 |
| H,0,0.367580066,-1.0802353368,-4.4906645563   | H,0,-3.3000820429,-0.3011660484,-2.4791681775 |
| H,0,0.7940512496,-1.7146109377,-2.9141084062  | H,0,-2.5953254202,-1.9098815251,1.4299366045  |
| C,0,0.526952269,0.4272309152,-2.9462527076    | H,0,-0.7716920811,-3.330832393,0.5236140235   |
| H,0,1.4796897626,0.7106423474,-3.4073025038   | C,0,0.2108146185,-3.3622073034,-2.0565719993  |
| H,0,-0.2273501909,1.146285066,-3.2748166952   | H,0,0.7052494227,-2.8607708061,-2.8885660771  |
| C,0,0.6610486105,0.4338838805,-1.4753528682   | H,0,0.9649349336,-3.601867185,-1.3066337156   |
| C,0,1.4851997724,0.1263748169,-0.5247602731   | H,0,-0.2015571056,-4.3031863615,-2.4318340796 |
| C,0,2.9265580039,0.3084404378,-0.3277357158   | C,0,-4.3124109065,-0.2848394167,0.114999731   |
| C,0,3.5081302865,1.5514654679,-0.5976978675   | H,0,-4.0631727304,-0.0998603585,1.1633899235  |
| C,0,3.7535092846,-0.7565617677,0.0466993986   | C,0,-4.5511813145,1.0802924966,-0.5345294088  |
| C,0,4.8834162808,1.7273881633,-0.4988239823   | H,0,-5.3336952635,1.6150587735,0.006546203    |
| H,0,2.8686178538,2.3764252918,-0.8829176117   | H,0,-3.6448615046,1.6844501963,-0.5070745058  |
| C,0,5.1267899742,-0.5818452268,0.1342726372   | H,0,-4.8821080916,0.9829240097,-1.5713459687  |
| H,0,3.3113040282,-1.7207488112,0.2580062747   | C,0,-5.5776061499,-1.1581071466,0.0669484505  |
| C,0,5.6962731702,0.6605659629,-0.1337139683   | H,0,-5.4226665818,-2.116015972,0.5675034855   |
| H,0,5.3189101218,2.6966554002,-0.7078451356   | H,0,-6.4105896656,-0.6486045134,0.5563226836  |
| H,0,5.7565844382,-1.4180710883,0.4107441022   | H,0,-5.8653010207,-1.3619648799,-0.9672297486 |
| H,0,6.7681130048,0.794458847,-0.0589831933    | Ru,0,-0.3086442486,-0.5621175209,-0.067241973 |
|                                               | C,0,1.2923728052,2.9015922473,-1.8875893416   |
| <b><sup>3</sup>TS2</b>                        | C,0,2.1142223827,2.4697675056,-2.9179960738   |
| C,0,-1.6148798468,-1.6150943189,-2.2784971995 | C,0,2.4357620967,1.1131155504,-3.0251057062   |
| C,0,-2.7589330286,-0.9449393434,-1.8009359186 | C,0,1.9815470395,0.2077649852,-2.0827501929   |
| C,0,-3.1368942841,-1.0332632673,-0.4704599865 | C,0,1.1570271268,0.628431832,-1.0240928193    |
| C,0,-2.3188843272,-1.8153655175,0.3877559454  | C,0,0.7872427003,1.9906368508,-0.9632438073   |
| C,0,-1.2621842489,-2.6097437359,-0.1182306176 | H,0,0.9978441673,3.9395022829,-1.7929344826   |

---

|                                              |                                               |
|----------------------------------------------|-----------------------------------------------|
| H,0,2.4959454425,3.176635926,-3.6435567277   | H,0,6.0743542792,1.2159931042,-0.05102863     |
| H,0,3.0676151665,0.7695685867,-3.8352855078  | H,0,6.9923136441,-0.8632541463,0.9360984377   |
| H,0,2.2946564485,-0.8273699275,-2.1330805284 | <b><sup>1</sup>TS2a</b>                       |
| C,0,-0.2323273534,2.423791815,0.03889493     | C,0,-0.1575818109,0.8396847183,-2.7061932956  |
| O,0,-0.342297936,3.5722305475,0.4614186812   | C,0,-0.6454943891,1.9621962397,-1.9850817087  |
| N,0,-0.9857304108,1.3437712158,0.3967526522  | C,0,-1.7591447411,1.8569018334,-1.1394813301  |
| O,0,-1.8619319614,1.4964245899,1.4834383886  | C,0,-2.4049732483,0.5825966486,-1.0799544322  |
| C,0,-1.2868742733,1.9829727197,2.7148690812  | C,0,-1.966647076,-0.5236990431,-1.8281447939  |
| H,0,-1.9906274581,1.6153847447,3.4662495245  | C,0,-0.7964249013,-0.418162243,-2.6365051383  |
| H,0,-1.3062120847,3.0744557466,2.7067240163  | H,0,0.7453231823,0.9420661005,-3.2940391003   |
| C,0,0.1330324258,1.5350444004,3.0629879768   | H,0,-0.0760094583,2.8796365451,-2.0160873034  |
| H,0,0.2881136851,1.8385905678,4.1027769494   | H,0,-3.2450140866,0.4605717152,-0.4104767431  |
| H,0,0.8531026452,2.0984868521,2.4688775723   | H,0,-2.464131509,-1.477061021,-1.715083945    |
| C,0,0.4557221907,0.0249864644,2.9404536802   | C,0,-0.2804300756,-1.6030240767,-3.3984641569 |
| H,0,1.3348758299,-0.2020088166,3.5526990363  | H,0,0.775942838,-1.4838699205,-3.6379503052   |
| H,0,-0.3770035528,-0.5727547451,3.3184506022 | H,0,-0.4023384184,-2.5188070292,-2.8193724409 |
| C,0,0.743405561,-0.3079810697,1.5274768199   | H,0,-0.8288211036,-1.7226025703,-4.3364343962 |
| C,0,1.6994712419,-0.1916563243,0.6248245662  | C,0,-2.2811662827,2.9959502045,-0.2898962523  |
| C,0,3.1509048025,-0.3613533319,0.6554175292  | H,0,-2.6590248582,2.5368595303,0.6287536142   |
| C,0,3.6802489015,-1.5309823426,1.2171951694  | C,0,-1.2013183489,4.0021877843,0.1116593517   |
| C,0,4.0331634719,0.6226144603,0.1943369485   | H,0,-1.6116600129,4.7214806188,0.8219415161   |
| C,0,5.0535101841,-1.7102142125,1.3172777668  | H,0,-0.3509499692,3.5068847901,0.5809794551   |
| H,0,3.0016024901,-2.3001108901,1.5640475959  | H,0,-0.8380856816,4.5692395168,-0.7488375917  |
| C,0,5.4049465076,0.4413010482,0.3014174338   | C,0,-3.4576075965,3.687499458,-0.9953802263   |
| H,0,3.6369170863,1.5318478917,-0.2356178847  | H,0,-4.2477582401,2.9766120193,-1.2446125318  |
| C,0,5.9213973794,-0.7243072477,0.8593377173  | H,0,-3.8867008618,4.460477098,-0.3548910058   |
| H,0,5.4457934244,-2.6221121763,1.7501646529  | H,0,-3.125472189,4.1613080713,-1.9225703407   |

---

|                                               |                                               |
|-----------------------------------------------|-----------------------------------------------|
| Ru,0,-0.2707731565,0.2117280368,-0.5444968012 | C,0,3.4237612358,-1.8353869816,-1.4881900298  |
| C,0,1.9683410934,2.3536257831,2.3633323356    | C,0,4.1704513809,-0.5478064478,0.4058485569   |
| C,0,2.8588809191,3.1482956457,1.6545251537    | C,0,4.7409087963,-2.1637565486,-1.7866155722  |
| C,0,3.0601291423,2.9126246691,0.2919499238    | H,0,2.6135112118,-2.2045385019,-2.1035025121  |
| C,0,2.409024648,1.8697843248,-0.3430923891    | C,0,5.4834405624,-0.8854320679,0.1127307663   |
| C,0,1.5032262432,1.0515533219,0.3554803534    | H,0,3.9455333124,0.080584144,1.2569132094     |
| C,0,1.2731437533,1.3377183607,1.717566656     | C,0,5.7740747898,-1.6896109947,-0.9865983346  |
| H,0,1.7722758641,2.5166842758,3.4159283126    | H,0,4.9591294458,-2.7897935775,-2.6428743056  |
| H,0,3.3888275891,3.951027313,2.1511049545     | H,0,6.2838805913,-0.5213904489,0.7445024267   |
| H,0,3.7459682306,3.5362695863,-0.2687142847   | H,0,6.8008055114,-1.9455681667,-1.2159958476  |
| H,0,2.6198222772,1.6592605633,-1.384269208    | C,0,-5.7292909131,-2.4881883726,0.143158987   |
| C,0,0.2201436564,0.5599901975,2.4321022029    | H,0,-5.8119173862,-3.3912525432,-0.4549070312 |
| O,0,0.1852358753,0.3856650301,3.6492067451    | H,0,-6.1559228661,-1.6408129597,-0.396433159  |
| N,0,-0.6478143191,0.0872533549,1.508081117    | H,0,-6.2935059872,-2.5968783487,1.0703931998  |
| O,0,-1.6288865017,-0.8095500365,1.9742997576  | C,0,-4.2828630522,-2.2113698631,0.4575079247  |
| C,0,-1.1858955565,-2.0191593247,2.6461069679  | O,0,-3.3584383112,-2.8931159312,0.0694395435  |
| H,0,-2.0413180347,-2.6842336968,2.5156812008  | O,0,-4.1351533313,-1.1174114451,1.206219461   |
| H,0,-1.0496221982,-1.7856090015,3.7017918757  | H,0,-3.1709791882,-0.9671308636,1.4266074386  |
| C,0,0.0737663129,-2.685406713,2.1084866159    | <b><sup>1</sup>TS2b</b>                       |
| H,0,0.0805626925,-3.6928035091,2.5357162225   | C,0,-0.8182538628,-0.5068273135,-2.6264680809 |
| H,0,0.9567106408,-2.1745207964,2.4934791698   | C,0,-1.4112411606,0.6085658974,-2.0156950496  |
| C,0,0.1874035526,-2.7925152312,0.5678493626   | C,0,-2.7928081752,0.6500468644,-1.7761749665  |
| H,0,0.9083525455,-3.5793450204,0.320478864    | C,0,-3.5462320896,-0.4478480287,-2.1784049969 |
| H,0,-0.7797418235,-3.0624318414,0.141490045   | C,0,-2.9604604651,-1.5514901543,-2.7999085862 |
| C,0,0.6577605041,-1.4936237159,0.0460201512   | C,0,-1.5948732148,-1.6052454382,-3.0342664168 |
| C,0,1.7205764004,-0.7625381662,-0.0497518148  | H,0,0.2238564851,-0.4535889199,-2.9220527791  |
| C,0,3.122208447,-1.0239008635,-0.3895576728   | H,0,-0.8051907039,1.4796007926,-1.8230679615  |

---

|                                               |                                              |
|-----------------------------------------------|----------------------------------------------|
| H,0,-4.61986631,-0.4362808637,-2.0240646271   | C,0,0.0802493219,1.6452256044,1.5588250642   |
| H,0,-3.5870510053,-2.3800289912,-3.1107636765 | O,0,-0.0371967881,2.3680726568,2.5447099906  |
| C,0,-0.9483825482,-2.8114379274,-3.6556136839 | N,0,-0.5618918225,0.478150136,1.3243973515   |
| H,0,-0.5651714671,-3.4815791765,-2.8797253201 | O,0,-1.3228539152,-0.0327179373,2.3996060618 |
| H,0,-1.6563881034,-3.379258062,-4.2606678203  | C,0,-0.635629971,-0.3494997875,3.6464415493  |
| H,0,-0.1051387003,-2.5322233522,-4.2902524535 | H,0,-1.2487462597,-1.1542435193,4.0595960759 |
| C,0,-3.4759451077,1.8345231348,-1.1140374832  | H,0,-0.7149050046,0.5327981703,4.2814872681  |
| H,0,-4.4254235904,1.9779413806,-1.6422213041  | C,0,0.8259899471,-0.7740046398,3.5741511826  |
| C,0,-3.8062898093,1.5242517226,0.3555371537   | H,0,1.0694904872,-1.1036466328,4.5896550758  |
| H,0,-4.3963751763,2.3335435088,0.7913072962   | H,0,1.4501471242,0.0970797146,3.3742914153   |
| H,0,-4.3742692473,0.5977564698,0.4505333261   | C,0,1.2040339415,-1.8963013482,2.5797774259  |
| H,0,-2.8910471089,1.4215774201,0.9381912118   | H,0,2.1820615998,-2.2975351164,2.8655372575  |
| C,0,-2.6868598146,3.1420814109,-1.2146259511  | H,0,0.4823439849,-2.7155235065,2.6357263225  |
| H,0,-2.4234991446,3.3776535342,-2.2476595081  | C,0,1.2633686941,-1.3312656278,1.2100408976  |
| H,0,-3.2821641013,3.9668815248,-0.8193138869  | C,0,2.081610263,-0.558102018,0.521844211     |
| H,0,-1.7659039598,3.0976378509,-0.6302559989  | C,0,3.5491704322,-0.5077478344,0.4678920065  |
| Ru,0,-0.0064989625,-0.7739391455,-0.142625158 | C,0,4.2582087136,-1.7151714321,0.4128179124  |
| C,0,1.2477271944,3.2406984567,0.0168296666    | C,0,4.2737946875,0.6864998283,0.5707884576   |
| C,0,1.942110351,3.4937531826,-1.1613311821    | C,0,5.646737104,-1.729276445,0.4652610488    |
| C,0,2.3505982807,2.4282875242,-1.9649019866   | H,0,3.7056072314,-2.6411185125,0.3172534855  |
| C,0,2.0990787586,1.1218148397,-1.5792366018   | C,0,5.6596134149,0.6690219352,0.6237265661   |
| C,0,1.3918198953,0.8371620565,-0.3963215031   | H,0,3.7445745959,1.6275668804,0.6267918      |
| C,0,0.9591370755,1.93415615,0.383586354       | C,0,6.3536526321,-0.5370412878,0.5692988129  |
| H,0,0.8955722108,4.0443139763,0.6515236133    | H,0,6.1758442321,-2.6729940103,0.415166326   |
| H,0,2.1571981578,4.5121008765,-1.4584953214   | H,0,6.2017774936,1.6020826362,0.7144125037   |
| H,0,2.8844243418,2.6209278944,-2.8873838887   | H,0,7.4356843625,-0.5454943768,0.6057847728  |
| H,0,2.4789526439,0.30414552,-2.1793283137     | C,0,-3.5753044393,-3.4982481115,0.1362096791 |



---

|                                               |                                              |
|-----------------------------------------------|----------------------------------------------|
| H,0,-3.1399416746,-4.0726772213,-0.6757249086 | H,0,4.6082177745,-0.278170456,1.3949446346   |
| H,0,-4.5234682512,-3.0641850086,-0.1841314357 | C,0,5.2283229216,0.9661878641,-0.9909724714  |
| H,0,-3.7815838832,-4.1411055636,0.992954103   | H,0,5.1002256245,1.2468905808,-2.0382412042  |
| C,0,-2.6494738663,-2.3932114244,0.5428561371  | H,0,5.9385326199,1.6603144213,-0.5373498617  |
| O,0,-1.5762856623,-2.2160265503,-0.0342675618 | H,0,5.6694501244,-0.0334254477,-0.9622082123 |
| O,0,-3.0859172886,-1.6687856969,1.5372221268  | Ru,0,0.717338905,-0.088460906,-0.5855581082  |
| H,0,-2.3966076826,-0.9854844088,1.8396910228  | C,0,-0.2345535821,-0.9643600699,3.5883670581 |
| <b>'TS3</b>                                   | C,0,-0.7030560438,-2.2631861938,3.711862039  |
| C,0,1.7909955063,-2.0717918994,-1.2007877756  | C,0,-1.34120887,-2.8562891877,2.6226247767   |
| C,0,2.7494114305,-1.2863161243,-0.5695942677  | C,0,-1.5316482695,-2.1504618432,1.4490471529 |
| C,0,2.8999481395,0.0874138179,-0.9259565951   | C,0,-1.0795075179,-0.8210286662,1.3020669406 |
| C,0,2.1703716419,0.5890048913,-2.047654925    | C,0,-0.3813534693,-0.2534355961,2.4015491801 |
| C,0,1.2490447641,-0.2435344357,-2.733709362   | H,0,0.2713256516,-0.4700305326,4.407958343   |
| C,0,0.9955747084,-1.555252534,-2.2744995026   | H,0,-0.5673670612,-2.8101997629,4.6356587499 |
| H,0,1.5947476375,-3.0730631759,-0.8406341927  | H,0,-1.701353827,-3.8755957117,2.6935267629  |
| H,0,3.2935416561,-1.6864273314,0.2723518993   | H,0,-2.0526744067,-2.6196894569,0.6252632026 |
| H,0,2.326878706,1.6110037565,-2.3664847136    | C,0,0.232885793,1.0976759427,2.30708333      |
| H,0,0.6809740849,0.1498624349,-3.5672754024   | O,0,0.2477703592,1.919830489,3.2219795269    |
| C,0,-0.0358338288,-2.4328619776,-2.9261548517 | N,0,0.7667797712,1.2732861107,1.070212264    |
| H,0,-0.6270121525,-2.9618432531,-2.177755839  | O,0,1.2879878614,2.5381844347,0.7761545758   |
| H,0,-0.7192414892,-1.853079539,-3.545226684   | C,0,0.3336299719,3.6249962886,0.8165164701   |
| H,0,0.445862606,-3.1804754045,-3.5626091555   | H,0,0.771576385,4.3573336862,0.1338474538    |
| C,0,3.8928668027,0.9957035369,-0.2295612273   | H,0,0.3139810637,4.0355263413,1.8276060096   |
| H,0,3.4785082939,2.0040452207,-0.2900446076   | C,0,-1.0943906145,3.289360426,0.3920292263   |
| C,0,4.0962385501,0.6767791325,1.2523337324    | H,0,-1.5916601847,4.2417766189,0.1901300206  |
| H,0,4.7168789338,1.4477138514,1.7111761303    | H,0,-1.627516514,2.8267376131,1.2237011219   |
| H,0,3.1454700938,0.6496053403,1.782015254     | C,0,-1.2431729397,2.3788910174,-0.853653554  |

---

|                                               |                                               |
|-----------------------------------------------|-----------------------------------------------|
| H,0,-2.292576532,2.3739598833,-1.1613798566   | C,0,0.7887281989,2.8941136189,2.0209104985    |
| H,0,-0.64049618,2.7606177643,-1.6802002144    | H,0,1.2352984012,2.219884987,2.7522828799     |
| C,0,-0.8188086312,1.0163048909,-0.461443424   | H,0,1.5390826203,3.1120083769,1.2611315439    |
| C,0,-1.5238419805,-0.0384086602,0.1147222561  | H,0,0.5431504899,3.829457982,2.5317365675     |
| C,0,-2.8623958098,-0.3355852221,-0.4651080398 | C,0,-4.0887919831,0.5842786141,-0.3555412006  |
| C,0,-3.04875743,-0.3693849085,-1.8503162964   | H,0,-3.8528047328,0.4375918371,-1.4129795551  |
| C,0,-3.980493545,-0.5149319561,0.3595297956   | C,0,-4.4989332292,-0.7767606378,0.2088559666  |
| C,0,-4.3108185504,-0.5672356633,-2.3994583595 | H,0,-5.3201767234,-1.1849359692,-0.3822074453 |
| H,0,-2.1890799369,-0.2465638936,-2.4959146941 | H,0,-3.6715125134,-1.4837336023,0.1698429101  |
| C,0,-5.2395467656,-0.7138485236,-0.1870688423 | H,0,-4.8519449748,-0.695362919,1.2400064532   |
| H,0,-3.8542259435,-0.4919278885,1.4340390715  | C,0,-5.2380145571,1.6003613861,-0.2486144304  |
| C,0,-5.4111978216,-0.7414649508,-1.5695341821 | H,0,-4.9701122524,2.5590620546,-0.6965502512  |
| H,0,-4.4319705228,-0.5927714938,-3.4754477216 | H,0,-6.1267449291,1.2224083246,-0.7580910065  |
| H,0,-6.0931639808,-0.8418668474,0.4669584242  | H,0,-5.498785918,1.7787959992,0.7975371641    |
| H,0,-6.3947938317,-0.9001857423,-1.9931105881 | Ru,0,-0.625734148,0.32518077,0.1576104768     |
|                                               | C,0,0.5111924752,-3.1613772966,1.937269612    |
| <b><sup>3</sup>TS3</b>                        | C,0,1.2268606818,-2.9085939975,3.0975209787   |
| C,0,-1.2508315332,1.3877951202,2.1490220593   | C,0,2.0126856687,-1.7572060461,3.176760661    |
| C,0,-2.4198434181,0.8300520334,1.5870836261   | C,0,2.1021355121,-0.9020216128,2.098690569    |
| C,0,-2.8391798127,1.1633152489,0.2755761269   | C,0,1.3906340829,-1.1359758103,0.8939881139   |
| C,0,-2.0166609472,2.0227599931,-0.4804743076  | C,0,0.5485327238,-2.2912384948,0.8513864751   |
| C,0,-0.821975343,2.5557865417,0.0784761026    | H,0,-0.1083870421,-4.0446205943,1.8500542826  |
| C,0,-0.4440531689,2.2853355136,1.4157173944   | H,0,1.1696812475,-3.5927474448,3.9342801578   |
| H,0,-0.9592136224,1.1081457806,3.1529778501   | H,0,2.5655213573,-1.5370685715,4.0819171424   |
| H,0,-2.9897069393,0.12272108,2.170057167      | H,0,2.7311613932,-0.025246995,2.1663854882    |
| H,0,-2.2935499228,2.2772162283,-1.4946465039  | C,0,-0.365794885,-2.6222202653,-0.3041961102  |
| H,0,-0.204285583,3.2094436342,-0.5237415115   | O,0,-0.4002281839,-3.7398624993,-0.8172713534 |

---

|                                               |                                               |
|-----------------------------------------------|-----------------------------------------------|
| N,0,-1.1317017782,-1.5555869093,-0.6073644951 | C,0,-3.691908423,-0.0970224865,-0.1312122974  |
| O,0,-1.9114380199,-1.6089735323,-1.7687569494 | C,0,-3.707807521,-1.0872232499,0.8714233943   |
| C,0,-1.2431762269,-1.9948534332,-2.9957381672 | C,0,-2.8119738714,-2.1874816595,0.7254918024  |
| H,0,-1.8491009815,-1.4948536274,-3.7560146153 | C,0,-1.945073125,-2.3191085261,-0.3781397024  |
| H,0,-1.3363930129,-3.0760276029,-3.1136236432 | C,0,-1.8900236557,-1.3016824961,-1.3654743833 |
| C,0,0.2292662625,-1.6191742758,-3.1688233015  | H,0,-2.6942402856,0.6438054282,-1.8995721284  |
| H,0,0.4429877762,-1.7447973643,-4.2356276278  | H,0,-4.3138346103,0.7819950263,-0.0506456398  |
| H,0,0.8536265402,-2.3398956593,-2.6409009398  | H,0,-2.7676159622,-2.9274141549,1.5147373889  |
| C,0,0.6442922043,-0.191859978,-2.7420909788   | H,0,-1.2716378055,-3.1638283993,-0.4350082473 |
| H,0,1.6357377513,0.0250825354,-3.1609631529   | C,0,-0.9371286445,-1.3768710642,-2.5229563466 |
| H,0,-0.055893363,0.5368832491,-3.1592780091   | H,0,-0.6391760433,-0.3807665877,-2.848517185  |
| C,0,0.6833202278,-0.0953853961,-1.2709687906  | H,0,-0.0360879696,-1.927919792,-2.2535239077  |
| C,0,1.6219013519,-0.2363979042,-0.2654365748  | H,0,-1.4083935056,-1.8851255425,-3.3691101034 |
| C,0,2.9239866257,0.480212264,-0.4024260347    | C,0,-4.628313194,-1.0188974233,2.0727735328   |
| C,0,2.9527362181,1.783164779,-0.9086337318    | H,0,-4.1467343376,-1.5978575006,2.8674851484  |
| C,0,4.1428681253,-0.1594686245,-0.147125023   | C,0,-4.8445994509,0.4022572705,2.5990788237   |
| C,0,4.1569002745,2.4350214829,-1.1408827225   | H,0,-5.3961542399,0.3712485834,3.5402677562   |
| H,0,2.0145706423,2.2787907966,-1.1209489292   | H,0,-3.8957211988,0.9136068395,2.7657414985   |
| C,0,5.3475676802,0.4870998737,-0.3894880833   | H,0,-5.4299084983,1.004416222,1.9014275627    |
| H,0,4.1419778533,-1.1738218899,0.2294660019   | C,0,-5.9659174149,-1.6994149639,1.7409621579  |
| C,0,5.3606000322,1.7888567482,-0.8813520123   | H,0,-5.818614065,-2.7276661616,1.4056078657   |
| H,0,4.1558655315,3.4475362147,-1.5253225649   | H,0,-6.6156727682,-1.7161277203,2.6182718902  |
| H,0,6.2800290637,-0.0290642346,-0.1975048599  | H,0,-6.4839613035,-1.1571544297,0.946503991   |
| H,0,6.3010607317,2.2931121206,-1.0637173867   | Ru,0,-1.5881935527,-0.2867140742,0.5699737197 |
|                                               | C,0,1.0655081426,2.4629739345,-2.7038760514   |
| <b><sup>1</sup>TS4</b>                        | C,0,2.2402886422,2.307192989,-3.398057576     |
| C,0,-2.7697244447,-0.1884545511,-1.2119025982 | C,0,3.2639642447,1.5151937743,-2.8435442478   |

---

|                                              |                                               |
|----------------------------------------------|-----------------------------------------------|
| C,0,3.1043912373,0.9073963717,-1.6229593289  | C,0,4.9234026116,-0.6991952969,2.0429011396   |
| C,0,1.9093909048,1.0566878049,-0.8686056377  | H,0,4.1639779228,1.1430126448,1.2454354102    |
| C,0,0.8769102998,1.8580926227,-1.4457036761  | C,0,4.670053209,-2.0462056352,2.2850330908    |
| H,0,0.2538051925,3.0589388076,-3.0992478866  | H,0,3.2498376704,-3.6432279432,2.0680573285   |
| H,0,2.3788846662,2.7846044286,-4.3592540962  | H,0,5.8658853131,-0.261804533,2.3487261909    |
| H,0,4.1890688859,1.3750481532,-3.3899650579  | H,0,5.4145110481,-2.6623247311,2.7731714647   |
| H,0,3.8976728064,0.2873636213,-1.2299577929  |                                               |
| C,0,-0.4089225767,2.0543754203,-0.7998308718 | <b><sup>1</sup>TS5</b>                        |
| O,0,-1.3581892047,2.6666077073,-1.2543125392 | C,0,-2.6300731388,-1.650926424,1.7991963842   |
| N,0,-0.5518369899,1.3837778209,0.4645260084  | C,0,-3.1615102996,-1.4129514669,0.4909236244  |
| O,0,-0.9889960903,2.705107624,1.6210470157   | C,0,-3.4774745184,-0.108558109,0.051589001    |
| C,0,0.0313478928,2.687570249,2.5683912255    | C,0,-3.1739599113,0.969127794,0.9353915091    |
| H,0,-0.1650605101,3.5061298365,3.2732455438  | C,0,-2.5588583085,0.7472690464,2.1689889217   |
| H,0,1.010869988,2.896684042,2.1097748856     | C,0,-2.2952659949,-0.5856857369,2.6318200841  |
| C,0,0.1010480729,1.3565031695,3.3371504151   | H,0,-2.4194304129,-2.6646280654,2.1114160329  |
| H,0,-0.7297621329,1.2918648606,4.0425290336  | H,0,-3.333818916,-2.2591642238,-0.157110128   |
| H,0,1.0308267176,1.3213089368,3.910811597    | H,0,-3.3318931823,1.9850123511,0.5974558242   |
| C,0,0.0716182553,0.1442959936,2.3791544759   | H,0,-2.2474309468,1.5883843199,2.772580327    |
| H,0,0.6834996847,-0.6788935657,2.7337627188  | C,0,-1.6095390751,-0.7881140849,3.9486624735  |
| H,0,-1.000386124,-0.2445594414,2.4245459047  | H,0,-1.4068602405,-1.8413039167,4.13627189    |
| C,0,0.4498495172,0.5332775226,0.9704362646   | H,0,-0.6593246365,-0.2515267075,3.9581095619  |
| C,0,1.7041486565,0.4016818205,0.3785743922   | H,0,-2.2245489595,-0.3991274482,4.7635207738  |
| C,0,2.7365971705,-0.4417385311,1.0191667779  | C,0,-4.0774793186,0.1946641561,-1.3035820058  |
| C,0,2.5026744763,-1.8011581096,1.2607979085  | H,0,-3.5715925941,1.0989521811,-1.6545826034  |
| C,0,3.9671476903,0.0927092847,1.4204756456   | C,0,-3.8338607126,-0.896419365,-2.3456774653  |
| C,0,3.4542172936,-2.5940769167,1.8920898779  | H,0,-4.1789367477,-0.5551218691,-3.3226622348 |
| H,0,1.563478488,-2.2341170853,0.9373435861   | H,0,-2.774031165,-1.1378206545,-2.4249713333  |

---

|                                               |                                               |
|-----------------------------------------------|-----------------------------------------------|
| H,0,-4.3833895189,-1.8111684538,-2.1102473701 | C,0,4.0398553577,0.2928463698,0.0134986442    |
| C,0,-5.5754774438,0.500651882,-1.1527498983   | C,0,3.6252876564,-0.7986378607,-0.7622076593  |
| H,0,-5.7520472817,1.3097667277,-0.4413561317  | C,0,4.9800594946,0.0830034372,1.0316502475    |
| H,0,-6.0015093113,0.7963768345,-2.1132122285  | C,0,4.1238033959,-2.0674875843,-0.5111156092  |
| H,0,-6.1161687909,-0.3812012277,-0.8001189655 | H,0,2.904106887,-0.635225695,-1.5491882998    |
| Ru,0,-1.2844651398,-0.2711803775,0.5238615989 | C,0,5.4805668352,-1.1888112557,1.2726683813   |
| C,0,0.8682093458,-2.169877351,-2.6315236515   | H,0,5.3052647817,0.922280691,1.6325366354     |
| C,0,1.0188726081,-3.5018286668,-2.2788139704  | C,0,5.0515738632,-2.2688558085,0.5066936228   |
| C,0,0.5403684305,-3.9451046918,-1.0433412163  | H,0,3.7746598291,-2.9008612753,-1.1071087856  |
| C,0,-0.1074822437,-3.0773805014,-0.1687676405 | H,0,6.2054391691,-1.3384297106,2.0634081729   |
| C,0,0.2282558517,-1.3104353943,-1.7424335374  | H,0,5.4383304244,-3.2611371108,0.7027070953   |
| H,0,1.2595653197,-1.7771029498,-3.5619259034  | C,0,0.9346178674,1.2154426307,1.8665474171    |
| H,0,1.5187321003,-4.1919130529,-2.9467983683  | C,0,2.073721427,1.1963657266,2.8597876233     |
| H,0,0.6797775178,-4.982001105,-0.7592069228   | H,0,2.582352232,0.2362887408,2.8573592572     |
| H,0,-0.4529196616,-3.454267955,0.7862949879   | H,0,2.771238585,1.9970994867,2.6239712015     |
| C,0,0.1653412047,0.1642914286,-1.9561778505   | H,0,1.6632207972,1.386628289,3.8550174535     |
| O,0,0.8613680389,0.7931652495,-2.7321731213   | O,0,0.5433060986,0.0679053366,1.4625468023    |
| N,0,-0.8522701762,0.6222583664,-1.1414593365  | O,0,0.4318373458,2.313449449,1.5458939396     |
| O,0,-0.5263067361,2.4678398553,-0.7959540347  | C,0,-0.2950566048,-1.7366947562,-0.514182023  |
| C,0,-0.168369529,3.5486348407,-1.6636075043   | H,0,-0.0845894566,2.4446056732,0.1285279488   |
| H,0,-0.572465928,4.4496069454,-1.1831202633   | C,0,2.2382592513,3.8728400096,-0.7480538208   |
| H,0,-0.7241329254,3.3838351679,-2.5869965212  | H,0,2.9901716402,4.6434442475,-0.9420998486   |
| C,0,1.3070515576,3.7459501738,-1.9794651382   | H,0,1.6769636429,4.208621202,0.1305225985     |
| H,0,1.3602717955,4.6719786192,-2.5610570662   |                                               |
| H,0,1.6506341646,2.9358866886,-2.6167052875   | <b><sup>1</sup>TS5b</b>                       |
| C,0,2.923463876,2.6290395337,-0.427913444     | C,0,-0.5664071702,-2.497532351,-0.0771452806  |
| C,0,3.4734864342,1.5780094044,-0.2224198461   | C,0,-1.4497702069,-1.7927166583,-0.9353332388 |

---

|                                               |                                              |
|-----------------------------------------------|----------------------------------------------|
| C,0,-2.4140747048,-0.8984823851,-0.4303083029 | C,0,1.1601766968,0.0225561525,-1.5313070588  |
| C,0,-2.4183620845,-0.6577457942,0.9682544238  | C,0,1.1780050319,1.2928606238,-2.1092278742  |
| C,0,-1.502303348,-1.309307632,1.7932681489    | H,0,1.9833765022,2.6138418255,-3.5921481817  |
| C,0,-0.5886137469,-2.2790104901,1.3009490752  | H,0,3.440382528,0.8249873585,-4.5717989611   |
| H,0,0.1308088404,-3.207489571,-0.501760954    | H,0,3.4140648162,-1.4400575112,-3.5876299191 |
| H,0,-1.38033023,-1.9685109894,-1.999100407    | H,0,2.0251146032,-1.9533741504,-1.6314059422 |
| H,0,-3.1247820313,0.0660566637,1.3906381769   | C,0,0.2772006614,2.2361904921,-1.3997784159  |
| H,0,-1.5017227853,-1.0799299429,2.8519519837  | O,0,0.3392967247,3.4454961294,-1.369898285   |
| C,0,0.3194173021,-3.0051947819,2.2470785862   | N,0,-0.687459456,1.4572683878,-0.7318151705  |
| H,0,1.0194610496,-3.6498931739,1.7174774418   | O,0,-1.7196889717,2.4769153649,1.1108417529  |
| H,0,0.8852888722,-2.2983028514,2.8569065964   | C,0,-1.2177240174,3.5401230071,1.8669619396  |
| H,0,-0.2674724776,-3.6266816968,2.9272697449  | H,0,-1.7940630352,3.6353414964,2.8017173476  |
| C,0,-3.3945918657,-0.144293215,-1.2947780044  | H,0,-1.2943327877,4.4954504813,1.333486541   |
| H,0,-3.3783181646,0.8875175732,-0.9318384434  | C,0,0.2417521796,3.2512959494,2.1986849946   |
| C,0,-3.038917502,-0.1370521666,-2.7791620888  | H,0,0.5866201888,3.9585667243,2.9567136884   |
| H,0,-3.7268037226,0.5198194563,-3.3118739954  | H,0,0.8527197526,3.4080401265,1.3083493663   |
| H,0,-2.0275045121,0.2362288665,-2.9468427276  | C,0,0.4490877153,1.8092176518,2.7278844071   |
| H,0,-3.1255065952,-1.1311659193,-3.2274509996 | H,0,1.228428985,1.7989863276,3.4967797653    |
| C,0,-4.81297047,-0.691909785,-1.0524199155    | H,0,-0.4741247024,1.4540026146,3.1887723238  |
| H,0,-5.0876182044,-0.6210850583,-0.0000868817 | C,0,0.900329896,0.8610379287,1.6913706976    |
| H,0,-5.530091431,-0.1019628139,-1.6250196978  | C,0,1.7715405607,0.2080737774,1.0766782228   |
| H,0,-4.893166837,-1.7334035612,-1.3760683613  | C,0,3.1231295716,-0.176232568,0.7512108847   |
| Ru,0,-0.1462287483,-0.0937840037,0.0714382298 | C,0,3.5854288214,-1.4758321929,0.9763841479  |
| C,0,1.993475075,1.6081253584,-3.1902417586    | C,0,3.9802538088,0.7622301871,0.1648147621   |
| C,0,2.7995350426,0.6128253397,-3.7257808167   | C,0,4.8822736921,-1.8279727432,0.6303177752  |
| C,0,2.7815758436,-0.6663771597,-3.1689440884  | H,0,2.9250929761,-2.2063840602,1.4219689967  |
| C,0,1.977392533,-0.9649969558,-2.0700559086   | C,0,5.2730940818,0.4027195375,-0.1853100942  |

---

|                                               |                                               |
|-----------------------------------------------|-----------------------------------------------|
| H,0,3.6150889726,1.760549664,-0.0338113525    | H,0,-1.2065403668,-0.5050748545,4.1304439385  |
| C,0,5.7282219556,-0.8915600876,0.0448106156   | H,0,-2.8865148912,-0.6779702072,4.6434335168  |
| H,0,5.2327817784,-2.8355515485,0.8149317921   | C,0,-3.8334966169,0.7311050339,-1.4777126881  |
| H,0,5.9243677572,1.133997467,-0.6463272122    | H,0,-3.074725914,1.4654052826,-1.7652134861   |
| H,0,6.7371168121,-1.1696953795,-0.2316269304  | C,0,-3.8318003429,-0.3651402769,-2.5424978015 |
| C,0,-6.4339748515,2.3997856145,1.1031682678   | H,0,-3.9986877217,0.0756852546,-3.5263649521  |
| H,0,-7.0396372656,1.8581205005,1.8273996337   | H,0,-2.8791154709,-0.8937936804,-2.5628201041 |
| H,0,-6.5515555184,3.4756709016,1.2375208887   | H,0,-4.6301035765,-1.0920559822,-2.374549199  |
| H,0,-6.7803067248,2.1618578205,0.0942976039   | C,0,-5.1932499768,1.4422427351,-1.4065177872  |
| C,0,-4.961480063,2.0153067902,1.2216204131    | H,0,-5.1837843581,2.2557354407,-0.6786708346  |
| O,0,-4.6513729951,1.0429880639,1.9407396415   | H,0,-5.4551182756,1.861027861,-2.3800158668   |
| O,0,-4.1564315763,2.7194141002,0.533424669    | H,0,-5.9804510959,0.7416381213,-1.1174163217  |
| H,0,-2.7216798148,2.5950954037,0.8591128521   | Ru,0,-1.4004880375,-0.5598547305,0.479023595  |
|                                               | C,0,0.2894543372,-2.998947949,-2.5887188903   |
| <b>TS5c</b>                                   | C,0,-0.0102209264,-4.3145910998,-2.2724025627 |
| C,0,-3.1663815611,-1.5053683603,1.633096695   | C,0,-0.7263703616,-4.5954015521,-1.1063346858 |
| C,0,-3.5198709265,-1.1019046035,0.306377698   | C,0,-1.1550834489,-3.5753911566,-0.2612887353 |
| C,0,-3.4329111906,0.2470247983,-0.1016823699  | C,0,-0.144425194,-1.9877231832,-1.7349227421  |
| C,0,-2.9003236467,1.1738425983,0.8379656226   | H,0,0.8664908452,-2.7378157438,-3.4672631986  |
| C,0,-2.4731337268,0.7694648883,2.1042372062   | H,0,0.3196948404,-5.121641738,-2.9142508017   |
| C,0,-2.616414125,-0.5886005086,2.5287257805   | H,0,-0.9450203438,-5.6259540374,-0.8501327633 |
| H,0,-3.2705360408,-2.5426883585,1.9197734031  | H,0,-1.6875157011,-3.8345545367,0.6455672868  |
| H,0,-3.8759490338,-1.8534819203,-0.3822233838 | C,0,0.2275905548,-0.5629075887,-1.924576379   |
| H,0,-2.7422654791,2.2027928899,0.541301012    | O,0,1.1003305732,-0.153871686,-2.6702966437   |
| H,0,-2.0021177038,1.4817792343,2.7633808344   | N,0,-0.6406819872,0.1884106465,-1.1372648758  |
| C,0,-2.1528405009,-0.9918871892,3.8956112906  | O,0,0.4021683664,1.7934772126,-0.9902134842   |
| H,0,-2.0272941295,-2.0711485349,3.9713874556  | C,0,0.0409338312,2.758137459,-1.9847928203    |

---

|                                              |                                               |
|----------------------------------------------|-----------------------------------------------|
| H,0,-0.386295496,3.6306966123,-1.4777883701  | C,0,2.3863730531,3.8058906208,-2.0211299165   |
| H,0,-0.734414995,2.3175281208,-2.615410049   | H,0,3.0648798533,4.3114750751,-2.7154281248   |
| C,0,1.2443517603,3.1499922542,-2.8245869079  | H,0,1.9819447367,4.5894735709,-1.369346578    |
| H,0,0.8957963851,3.8553261955,-3.5857071503  | C,0,0.8508946685,3.8211781411,1.595149306     |
| H,0,1.6160989382,2.2595948474,-3.3315016723  | H,0,0.5628470727,4.7289465371,1.0636644741    |
| C,0,3.142968835,2.8371514447,-1.2394984709   | H,0,0.8995492489,4.040674077,2.6641474926     |
| C,0,3.7146978416,1.9420926722,-0.6730792477  | H,0,1.8383478966,3.5029747554,1.2486937054    |
| C,0,4.3005385793,0.7846830274,-0.0852870106  | O,0,-0.1385872228,2.8242845711,1.3291637163   |
| C,0,3.8591722104,-0.4830876712,-0.4984186843 | H,0,0.0647807619,2.0328189881,1.9077050747    |
| C,0,5.3067386934,0.8734110185,0.8863072497   |                                               |
| C,0,4.422802406,-1.627175115,0.0456617337    | <sup>1</sup> TSd                              |
| H,0,3.0754392239,-0.5490732412,-1.2414041406 | C,0,-2.5438100809,-1.141707508,2.0268036353   |
| C,0,5.8634536639,-0.2788425248,1.4251313234  | C,0,-3.127075544,-1.3274612312,0.7328064044   |
| H,0,5.6462440909,1.8488144015,1.2097542642   | C,0,-3.6175915487,-0.2448692622,-0.0395946023 |
| C,0,5.4265146955,-1.5314339567,1.005231817   | C,0,-3.4323944889,1.0614517662,0.5132139454   |
| H,0,4.067789342,-2.5981950304,-0.275635192   | C,0,-2.8980133593,1.267357725,1.8079743372    |
| H,0,6.639981373,-0.1984969967,2.1756183385   | C,0,-2.4158791684,0.1644262719,2.5664645114   |
| H,0,5.8617135391,-2.4278325104,1.4288594598  | H,0,-2.1767783912,-2.00325568,2.5869361647    |
| C,0,1.0009033458,-0.254362873,2.29683328     | H,0,-3.1643881381,-2.338111105,0.3240076444   |
| C,0,2.3014532558,-0.824354213,2.8147692064   | H,0,-3.7066166093,1.9299159475,-0.0913041351  |
| H,0,3.1230235549,-0.2509548649,2.3830657492  | H,0,-2.7602388371,2.2827318112,2.1838662648   |
| H,0,2.3443008449,-0.7067900212,3.8971653927  | C,0,-1.6773000575,0.4159056611,3.850641849    |
| H,0,2.422790072,-1.8658550321,2.5300474934   | H,0,-1.3996035817,-0.5212694709,4.3523060224  |
| O,0,0.4498577011,-0.9285414128,1.3602597174  | H,0,-0.7544296485,0.971554404,3.6157844453    |
| O,0,0.565981705,0.8030059408,2.7960259458    | H,0,-2.2819587577,1.0242086669,4.5413727773   |
| C,0,-0.8811009376,-2.241724576,-0.5714865217 | C,0,-4.272687825,-0.4082344088,-1.4001829326  |
| H,0,0.1301846269,2.1371221897,-0.0844366612  | H,0,-3.9870834166,0.485717891,-1.9807733066   |



---

|                                               |                                               |
|-----------------------------------------------|-----------------------------------------------|
| C,0,-3.7833921637,-1.6344495786,-2.1781885226 | H,0,1.8277384625,3.3599933986,-2.1768111806   |
| H,0,-4.1990256705,-1.6224558281,-3.1975874675 | C,0,3.219814917,2.6521057581,-0.0768669026    |
| H,0,-2.6862750189,-1.6519042378,-2.2511992166 | C,0,3.6673066228,1.5236476947,-0.0347597163   |
| H,0,-4.1117492514,-2.5755016229,-1.7068580434 | C,0,4.116410824,0.1665305326,-0.0450258375    |
| C,0,-5.8042822691,-0.4104701098,-1.2478326109 | C,0,3.670866865,-0.6955709008,-1.0689230411   |
| H,0,-6.1620640176,0.4949084538,-0.7321768258  | C,0,4.9604744083,-0.3429979996,0.9618200006   |
| H,0,-6.2936360232,-0.4574911899,-2.2339104999 | C,0,4.0518176605,-2.0368183061,-1.071594933   |
| H,0,-6.1362208516,-1.2841921077,-0.6623691972 | H,0,3.0073344814,-0.2956555999,-1.8375326385  |
| Ru,0,-1.4111975664,0.0644234037,0.4456746257  | C,0,5.3405834828,-1.6857288369,0.947976112    |
| C,0,0.7800532072,-1.7481579374,-2.7323792344  | H,0,5.3042274476,0.3215889082,1.7575409039    |
| C,0,0.8414963004,-3.114450245,-2.4672565401   | C,0,4.88614216,-2.5372475688,-0.0654327026    |
| C,0,0.3104600999,-3.6087586417,-1.2627681274  | H,0,3.6781732263,-2.697449345,-1.8568481458   |
| C,0,-0.3076474847,-2.7582597049,-0.3408333408 | H,0,5.9923161634,-2.0720429782,1.7361973349   |
| C,0,0.1661138467,-0.9059164265,-1.7970961473  | H,0,5.179408296,-3.590328676,-0.0687936461    |
| H,0,1.2132878832,-1.3158915435,-3.6382642535  | C,0,-0.4187136585,-1.3790112165,-0.6008922329 |
| H,0,1.3127076766,-3.796881392,-3.1792524005   | C,0,2.7027212792,4.0021889941,-0.2833829211   |
| H,0,0.3814625393,-4.6785156367,-1.0437159849  | H,0,3.547292222,4.6500327727,-0.5794157244    |
| H,0,-0.7068653907,-3.1801871701,0.5861724395  | H,0,2.3261293585,4.4261050017,0.6667913521    |
| C,0,0.194269482,0.5788249745,-1.890757874     | C,0,1.3126176023,-0.0886934741,1.7600591736   |
| O,0,1.0168136364,1.2301663447,-2.5140602252   | H,0,0.9215147613,-0.6890346171,2.6094595311   |
| N,0,-0.883968024,1.0622328105,-1.1416320426   | H,0,2.16955183,0.5004209178,2.1334809361      |
| O,0,-0.174790519,2.616926382,-0.3149144679    | H,0,1.7026486725,-0.796292004,1.0073835938    |
| C,0,0.1828212776,3.8658237315,-0.8835952193   | O,0,0.3390287672,0.7767863387,1.2506863314    |
| H,0,-0.0616179421,4.6311759349,-0.1192291044  | H,0,0.3929394478,2.0770817163,0.3513702346    |
| H,0,-0.5161423543,4.0119860836,-1.7226277247  |                                               |
| C,0,1.608792271,4.0754361365,-1.3733115482    | <sup>1</sup> TS5e                             |
| H,0,1.6203972101,5.0892190178,-1.8110521127   | C,0,0.3501983018,-2.549599583,0.8108337117    |

---

|                                               |                                              |
|-----------------------------------------------|----------------------------------------------|
| C,0,-0.3704970036,-2.4058083317,-0.3968987968 | C,0,2.2231892646,-0.4817029787,-1.8408250234 |
| C,0,-1.7111233345,-1.9557626065,-0.3925406509 | C,0,1.1368976008,0.2456500582,-1.3451751997  |
| C,0,-2.3129623744,-1.6976531414,0.86720729    | C,0,0.6980840626,1.3710268773,-2.0686190505  |
| C,0,-1.6006240714,-1.8391157898,2.0566528426  | H,0,0.9364403562,2.6705190675,-3.7695529773  |
| C,0,-0.247135059,-2.2476059974,2.0541718976   | H,0,2.8855036566,1.3359552944,-4.6729385208  |
| H,0,1.3791293709,-2.9127900436,0.7755680457   | H,0,3.674121203,-0.670383454,-3.4287026908   |
| H,0,0.1218147882,-2.6518633076,-1.3377681664  | H,0,2.6135757463,-1.3457813805,-1.2981143849 |
| H,0,-3.3364492807,-1.3197491979,0.8839920998  | C,0,-0.4795192682,2.0529702923,-1.446786413  |
| H,0,-2.0842252701,-1.5855513809,3.0020174642  | O,0,-0.9198029768,3.1565102189,-1.6992214654 |
| C,0,0.5384552352,-2.3152751703,3.3362378794   | N,0,-1.0285926437,1.1354867243,-0.5329279835 |
| H,0,1.3218052182,-3.0866263762,3.2941204043   | O,0,-2.068909424,1.3852117489,1.4640222024   |
| H,0,1.0318270224,-1.3460495497,3.5260210856   | C,0,-2.0030687071,2.6236556866,2.0469922675  |
| H,0,-0.114119522,-2.5295739374,4.1949967043   | H,0,-2.2554948225,2.5499299253,3.1378615753  |
| C,0,-2.5356952321,-1.7474849737,-1.6498416586 | H,0,-2.7528436991,3.3312072323,1.6236248223  |
| H,0,-3.0525969473,-0.7873878489,-1.4804861086 | C,0,-0.6161978767,3.2727320248,1.9406721089  |
| C,0,-1.7073117977,-1.650769324,-2.932483752   | H,0,-0.6148696127,4.2233536343,2.5017756741  |
| H,0,-2.3586889824,-1.3785133299,-3.7768602844 | H,0,-0.4150214972,3.5217020333,0.8860398526  |
| H,0,-0.9213275679,-0.8856364553,-2.854089458  | C,0,0.5018610261,2.3785934913,2.4999757481   |
| H,0,-1.2277243892,-2.6109659113,-3.1895183877 | H,0,1.4082420748,2.9759337733,2.704139988    |
| C,0,-3.6156890717,-2.8396948258,-1.7617468833 | H,0,0.1749246052,1.9672288586,3.4735288481   |
| H,0,-4.2514089746,-2.8733005151,-0.8639102251 | C,0,0.9262781938,1.2389420874,1.6494486073   |
| H,0,-4.2686723739,-2.6396526693,-2.625834646  | C,0,1.840261302,0.4362260617,1.2620399679    |
| H,0,-3.1624455325,-3.836168927,-1.8998965094  | C,0,3.2326495037,0.0591309375,1.1156518108   |
| Ru,0,-0.0016279893,-0.0660855123,0.3320186976 | C,0,3.7240160438,-1.1743336063,1.5826969563  |
| C,0,1.31357258,1.7839423219,-3.2530399552     | C,0,4.1184429565,0.9391871256,0.4616839418   |
| C,0,2.3905567288,1.0412494036,-3.7443040615   | C,0,5.0654690955,-1.516844449,1.40483086     |
| C,0,2.8328977797,-0.0882470731,-3.0415031559  | H,0,3.0505483514,-1.8577335817,2.0997635409  |

---

|                                               |                                               |
|-----------------------------------------------|-----------------------------------------------|
| C,0,5.4570748851,0.5908687242,0.2823235207    | H,0,-1.5100339595,-4.9480916531,2.2466058075  |
| H,0,3.7357959957,1.8866110138,0.0777749695    | C,0,-4.1478839805,0.1685378958,-0.4892683052  |
| C,0,5.9353428046,-0.6379510052,0.7505380041   | H,0,-3.4088600829,0.7737761732,-1.0242272341  |
| H,0,5.4344982066,-2.4748508689,1.7798239433   | C,0,-5.226237263,-0.2480731061,-1.5027727596  |
| H,0,6.1301471528,1.280712843,-0.2328362021    | H,0,-5.7168450549,0.6319560833,-1.9253682337  |
| H,0,6.9838947734,-0.9100598813,0.6065095521   | H,0,-4.7996646723,-0.8235776139,-2.3251729037 |
| C,0,-4.3818019375,1.7767956434,-0.8572634524  | H,0,-5.9889630646,-0.8647750346,-1.0199807871 |
| H,0,-4.9254304659,1.4407991509,-1.7589074508  | C,0,-4.7549816855,1.044328653,0.6079598509    |
| H,0,-5.029107827,2.5232093355,-0.3476563698   | H,0,-4.0170857612,1.3171292785,1.3629817839   |
| H,0,-3.4677504689,2.3053622195,-1.1920445322  | H,0,-5.1512090751,1.9631722514,0.171647044    |
| H,0,-3.3649136668,0.9437416378,0.5753108571   | H,0,-5.5839589697,0.5386701231,1.1106937728   |
| O,0,-4.0943704978,0.6673095074,-0.0463006655  | Ru,0,-0.0600026115,0.709534749,-0.254029108   |
|                                               | C,0,1.1358684593,-2.2122396159,-2.939173262   |
| <b>'TS6</b>                                   | C,0,1.6749955266,-3.2718664341,-2.2277329599  |
| C,0,-1.8001506337,-2.827849381,-0.3931973086  | C,0,1.9350285171,-3.1366711233,-0.8595702183  |
| C,0,-2.536318424,-1.7357355931,-0.8257627873  | C,0,1.7273164447,-1.92774718,-0.2247076917    |
| C,0,-3.4012155916,-1.0478795884,0.0320229049  | C,0,1.2454744967,-0.8217424014,-0.9457237972  |
| C,0,-3.5272287448,-1.5319726979,1.3325756918  | C,0,0.9030546017,-0.9964149906,-2.2986747316  |
| C,0,-2.7977474165,-2.6362185163,1.7629673919  | H,0,0.8480361529,-2.313684967,-3.978137298    |
| C,0,-1.9061953064,-3.2910537811,0.9177718671  | H,0,1.8651616578,-4.2163969011,-2.7219556579  |
| H,0,-1.1173666265,-3.3146919059,-1.0794445743 | H,0,2.2997635769,-3.984253902,-0.2932494972   |
| H,0,-2.4246358565,-1.3908061102,-1.8451965494 | H,0,1.9359787344,-1.8257589698,0.8309332838   |
| H,0,-4.1871770834,-1.0392331836,2.0334372216  | C,0,-0.0144526886,0.0084993353,-2.9053300836  |
| H,0,-2.9151346336,-2.9818277465,2.7841783329  | O,0,-0.1517855322,0.1896717427,-4.1014523671  |
| C,0,-1.0443492691,-4.4214165545,1.4119539524  | N,0,-0.7435188515,0.6994185482,-1.9429787544  |
| H,0,-0.8428163539,-5.1466215332,0.6217282699  | O,0,-1.4328622438,2.3626596783,0.2401265816   |
| H,0,-0.0772693105,-4.0436131545,1.7588888002  | C,0,-0.9069814492,3.7008115599,0.2723395465   |

---

|                                              |                                              |
|----------------------------------------------|----------------------------------------------|
| H,0,-0.4243349043,3.8782287579,1.2406435477  | O,0,-0.2678263009,-0.2018681828,1.5824644778 |
| H,0,-1.7531416453,4.3868709223,0.1851117825  | H,0,-1.6682574708,2.0628706209,1.1715399036  |
| C,0,0.0727936725,3.9586867627,-0.8676028284  |                                              |
| H,0,0.1810742016,5.0399834571,-0.9807126292  | <b><sup>3</sup>TS6</b>                       |
| H,0,-0.3642936472,3.5745055789,-1.7911305998 | C,0,2.1059912943,-1.9163360725,0.6946073633  |
| C,0,1.4746839718,3.3474457651,-0.6718769842  | C,0,2.8599021722,-0.7582486059,0.8940712129  |
| H,0,2.0972541485,3.5678444208,-1.5451028713  | C,0,3.7241675556,-0.2719443566,-0.0962462004 |
| H,0,1.973897523,3.8075921941,0.1889270768    | C,0,3.7879712331,-0.9802906823,-1.2914701441 |
| C,0,1.4220577002,1.8851417605,-0.4825669737  | C,0,3.0341565375,-2.1341884974,-1.4890647376 |
| C,0,2.028857949,0.7319092529,-0.2636157754   | C,0,2.1851503827,-2.6282060045,-0.5052272465 |
| C,0,3.2816378012,0.4115719677,0.4381985679   | H,0,1.4716703056,-2.2801986229,1.4930994495  |
| C,0,4.3374368712,-0.2333540986,-0.2085985915 | H,0,2.8035042712,-0.2485032246,1.8481143329  |
| C,0,3.4327522593,0.8139859989,1.767517421    | H,0,4.4252618225,-0.6304123739,-2.0922512083 |
| C,0,5.5317330911,-0.4583931539,0.4615620043  | H,0,3.1094653816,-2.6583740255,-2.435696521  |
| H,0,4.2138178258,-0.556268328,-1.2337907704  | C,0,1.374728116,-3.8744508372,-0.7346288542  |
| C,0,4.6244588327,0.5723175135,2.4395687064   | H,0,0.7586694057,-4.1140923929,0.1310807815  |
| H,0,2.6051730688,1.2969966069,2.2707135798   | H,0,0.7066432535,-3.7510600926,-1.5900759715 |
| C,0,5.6771922412,-0.0601305561,1.787268008   | H,0,2.0195287101,-4.7317500108,-0.9433409565 |
| H,0,6.3493103117,-0.949840789,-0.0502248041  | C,0,4.5671574025,0.9549299027,0.1944634973   |
| H,0,4.7291308471,0.8766541417,3.473250934    | H,0,3.9358916093,1.6248710787,0.784420802    |
| H,0,6.6068328023,-0.2450995737,2.3101103188  | C,0,5.7825804829,0.5697921065,1.0546172967   |
| C,0,-0.9130840592,-0.5972735602,3.8184125228 | H,0,6.3610125336,1.4572391156,1.3224118044   |
| H,0,-0.7292355964,-1.6420794087,3.581711368  | H,0,5.4761736848,0.0721125172,1.9762456143   |
| H,0,-0.0762179927,-0.2242638133,4.4143691215 | H,0,6.4393682025,-0.1116132006,0.5079184668  |
| H,0,-1.8256160254,-0.4858681337,4.3996189323 | C,0,5.0070912014,1.7193780392,-1.0557488003  |
| C,0,-0.9997069136,0.230282966,2.5578156944   | H,0,4.1601863459,1.9509659119,-1.7019950684  |
| O,0,-1.6967065644,1.2539708574,2.5384050668  | H,0,5.489705753,2.6554512594,-0.767826711    |

---

|                                               |                                               |
|-----------------------------------------------|-----------------------------------------------|
| H,0,5.7348856086,1.1485664213,-1.6385417029   | C,0,-3.6731573032,0.1385843125,-0.1542485958  |
| Ru,0,0.1957103463,0.3882949253,0.3652153331   | C,0,-4.4689274201,-0.3410845567,0.8934169442  |
| C,0,-2.0063075938,-2.6650250122,2.2946340033  | C,0,-4.2172338179,0.2481118264,-1.4414548874  |
| C,0,-2.3962642906,-3.5788855657,1.3194764582  | C,0,-5.7884620415,-0.6913200003,0.6555997672  |
| C,0,-2.1924488159,-3.3049805936,-0.0366613699 | H,0,-4.0427576901,-0.4376639502,1.8822363584  |
| C,0,-1.6279581794,-2.1035470266,-0.4311287663 | C,0,-5.5404799901,-0.1008183005,-1.6694507614 |
| C,0,-1.261539221,-1.15695387,0.536161548      | H,0,-3.5920397356,0.6046070798,-2.2492784203  |
| C,0,-1.4505064488,-1.4571900257,1.9020926262  | C,0,-6.3268777727,-0.5731745203,-0.623481257  |
| H,0,-2.115254038,-2.8770615555,3.3509672092   | H,0,-6.4006239647,-1.0571610997,1.4698052927  |
| H,0,-2.8496728181,-4.5176198414,1.6128681272  | H,0,-5.9567014748,-0.0089581279,-2.6645204311 |
| H,0,-2.4801047265,-4.0370848942,-0.7809698625 | H,0,-7.3574713576,-0.8510312023,-0.8041420001 |
| H,0,-1.4758376929,-1.8728334584,-1.47733874   | C,0,1.1632737795,0.049214691,-4.0147588755    |
| C,0,-0.8450349626,-0.4670411042,2.8615067163  | H,0,1.8278071239,-0.8168533838,-3.9838467821  |
| O,0,-1.0649961135,-0.4586231524,4.0639242984  | H,0,0.1755521335,-0.3031932198,-4.3099624431  |
| N,0,0.0041646526,0.3592735628,2.1729718867    | H,0,1.5485353357,0.7668758669,-4.7352489714   |
| O,0,1.5594230183,2.217679998,0.0836326267     | C,0,1.1181867703,0.6503140579,-2.6277091592   |
| C,0,1.0683848853,3.5589679795,0.2261860008    | O,0,1.7752873472,1.6859030752,-2.3927472653   |
| H,0,1.1166736258,4.0425867282,-0.7550792513   | O,0,0.4075075929,0.0189798884,-1.7744265885   |
| H,0,1.7503374008,4.0874292413,0.8973647942    | H,0,1.742102925,2.0524394064,-0.9055767418    |
| C,0,-0.3500956669,3.6573499192,0.7786024865   |                                               |
| H,0,-0.5819728148,4.7225186602,0.8669579945   | <b><sup>1</sup>TS7</b>                        |
| H,0,-0.383871174,3.2366209247,1.7856993265    | C,0,-2.710789391,1.6502483477,1.5026452239    |
| C,0,-1.4266287787,2.9907011028,-0.0949992396  | C,0,-2.9708647388,0.2897907243,1.5781529541   |
| H,0,-2.4148755348,3.380907124,0.1627047693    | C,0,-3.8507503011,-0.3359788351,0.6917877881  |
| H,0,-1.2473912909,3.2353354829,-1.1474750596  | C,0,-4.4631406638,0.4607226067,-0.2734680072  |
| C,0,-1.4482278351,1.5040783127,0.0372938203   | C,0,-4.1980383381,1.8245562936,-0.352781959   |
| C,0,-2.3143325794,0.5625469055,0.0595955198   | C,0,-3.3124563831,2.4433608151,0.5256865537   |

---

|                                               |                                               |
|-----------------------------------------------|-----------------------------------------------|
| H,0,-2.0183735318,2.0876316003,2.2111719142   | H,0,2.2654294643,3.7574111196,-2.2150302718   |
| H,0,-2.4621431853,-0.2979356958,2.3330061433  | H,0,3.200209705,1.5002167306,-1.9777083358    |
| H,0,-5.1458996975,0.021067566,-0.9879084394   | C,0,0.6336233079,0.6344888465,1.8302938622    |
| H,0,-4.6902945268,2.4163974981,-1.116951968   | O,0,0.2243450789,1.0142625462,2.9067997389    |
| C,0,-2.9740655192,3.9041751436,0.393373365    | N,0,0.4685425704,-0.6977726152,1.3776708565   |
| H,0,-2.7196228088,4.3444180445,1.3591639171   | O,0,-1.133123961,-1.9562223837,-0.6380524428  |
| H,0,-2.1124014764,4.0399950385,-0.2673837514  | C,0,-0.5414596599,-3.2582629661,-0.7520072537 |
| H,0,-3.8044833773,4.4723107958,-0.0292084204  | H,0,-0.1049095292,-3.3797315361,-1.7504878746 |
| C,0,-4.1121792888,-1.8251128957,0.8367356367  | H,0,-1.3516177578,-3.9842782266,-0.643364018  |
| H,0,-3.1380456045,-2.2855820509,1.029381006   | C,0,0.5054567454,-3.4921913686,0.326181512    |
| C,0,-5.0090836438,-2.098473461,2.055388761    | H,0,0.7070013999,-4.5660029761,0.3554479694   |
| H,0,-5.1469337688,-3.1727303089,2.2022956689  | H,0,0.0874741811,-3.2105672033,1.2922439964   |
| H,0,-4.578597443,-1.6819621822,2.9671323206   | C,0,1.841820828,-2.7693318122,0.0999554227    |
| H,0,-5.993799281,-1.6459076068,1.913610654    | H,0,2.552927465,-3.0736201618,0.8748073524    |
| C,0,-4.6945790212,-2.4842959819,-0.4149400571 | H,0,2.2579910098,-3.1145077158,-0.8540170695  |
| H,0,-4.1059784303,-2.2564837257,-1.3037332581 | C,0,1.7760528117,-1.2805269873,0.0417895378   |
| H,0,-4.725362174,-3.5685047773,-0.2868181643  | C,0,2.7326853538,-0.3178203218,-0.0106243366  |
| H,0,-5.7200046239,-2.1531157475,-0.598247774  | C,0,4.1917353499,-0.4262336078,0.0226605012   |
| Ru,0,0.0238558395,-0.2275553082,-0.3696586322 | C,0,4.9621136662,0.6767129327,0.4306973244    |
| C,0,0.6147303671,2.8341801948,0.5863194847    | C,0,4.8732005128,-1.6034214323,-0.3267934157  |
| C,0,1.025453463,3.6263251675,-0.4516179279    | C,0,6.3447107644,0.6016821161,0.4960723278    |
| C,0,1.9465745458,3.1268819092,-1.394553461    | H,0,4.4662694642,1.5959039748,0.7138960592    |
| C,0,2.4605204213,1.860416043,-1.2753364291    | C,0,6.2574823568,-1.6748118749,-0.2618484434  |
| C,0,2.0589216824,1.0026534777,-0.216435332    | H,0,4.3214863792,-2.4642053125,-0.6723567088  |
| C,0,1.082374164,1.5027370363,0.7025917273     | C,0,7.002073549,-0.575207963,0.1507931746     |
| H,0,-0.077297361,3.193742285,1.3340176385     | H,0,6.9118684993,1.4637854081,0.8241110115    |
| H,0,0.6485842641,4.6360376219,-0.5482668125   | H,0,6.7577174929,-2.5935873796,-0.5417444309  |

---

|                                               |                                               |
|-----------------------------------------------|-----------------------------------------------|
| H,0,8.0817257735,-0.6335889898,0.2009396092   | C,0,4.9892817821,-2.1119521028,-2.429905849   |
| C,0,-2.5690793781,1.1841759799,-3.603616785   | H,0,5.1456725434,-3.1357689259,-2.7778554926  |
| H,0,-3.0808299832,1.9638823793,-3.0383699045  | H,0,4.6123086738,-1.5222786779,-3.2667424713  |
| H,0,-1.7743504735,1.6628223178,-4.176800859   | H,0,5.9584370371,-1.6994972055,-2.138404574   |
| H,0,-3.2700282794,0.6849622011,-4.2675153946  | C,0,4.5204133551,-2.9724353793,-0.1057299192  |
| C,0,-1.9710121425,0.2072980034,-2.6247046438  | H,0,3.8684261896,-2.9152883856,0.7669205454   |
| O,0,-2.3575192865,-0.9733286012,-2.60212328   | H,0,4.5672313324,-4.0124542805,-0.4345753402  |
| O,0,-1.0617804678,0.7020700096,-1.8527297928  | H,0,5.5273290967,-2.6876736105,0.2085251837   |
| H,0,-1.6992900581,-1.7141872828,-1.4546314683 | Ru,0,0.116465314,-0.0955757731,-0.0745152915  |
|                                               | C,0,-0.6218588745,2.833637024,-1.6607980515   |
| <b><sup>3</sup>TS7</b>                        | C,0,-0.9585305048,3.8330418742,-0.7900553482  |
| C,0,2.515673579,1.4149654473,-1.2315019789    | C,0,-1.7475140459,3.5418155379,0.3400706769   |
| C,0,2.8401026559,0.1120604462,-1.5911618723   | C,0,-2.205240819,2.2698618875,0.5498169659    |
| C,0,3.7219091167,-0.6553691432,-0.820897707   | C,0,-1.8679131802,1.2029058457,-0.3285199326  |
| C,0,4.275355333,-0.05755006,0.3039162759      | C,0,-1.0255948543,1.4903697602,-1.4433582363  |
| C,0,3.9447873845,1.2472758447,0.6686883905    | H,0,-0.0557337665,3.0382540675,-2.5590006161  |
| C,0,3.0518319781,2.0036542862,-0.0786437409   | H,0,-0.6287061124,4.8477702957,-0.9724969056  |
| H,0,1.864063621,1.9898680824,-1.8733215542    | H,0,-2.0078839753,4.3302826852,1.0347960274   |
| H,0,2.3980234208,-0.3119661588,-2.4849308653  | H,0,-2.8411645793,2.0513261828,1.3969508922   |
| H,0,4.9540039071,-0.6128142974,0.9368101552   | C,0,-0.6014487451,0.4668783888,-2.4870639825  |
| H,0,4.3811354605,1.6697981139,1.5665561573    | O,0,-0.3131880797,0.8018226791,-3.6329213542  |
| C,0,2.6167804961,3.3749740797,0.3563400435    | N,0,-0.3663735222,-0.758611091,-1.953865634   |
| H,0,2.5057955535,4.0491128772,-0.4946371425   | O,0,1.2815385146,-1.754920038,0.4927475437    |
| H,0,1.6458336877,3.3142510244,0.8554210068    | C,0,0.7831870472,-3.0963147895,0.6269659135   |
| H,0,3.3293372826,3.818534451,1.0531309742     | H,0,0.5143240876,-3.2630401596,1.6761231018   |
| C,0,4.0144163943,-2.0823928727,-1.2418127218  | H,0,1.6059819492,-3.7697854084,0.373826697    |
| H,0,3.0599850934,-2.4949447923,-1.584909168   | C,0,-0.4052329654,-3.3682830882,-0.2751730045 |

---

|                                               |                                               |
|-----------------------------------------------|-----------------------------------------------|
| H,0,-0.6235197183,-4.437653741,-0.2136395389  | <b><sup>1</sup>Ts8</b>                        |
| H,0,-0.1429867843,-3.1407723769,-1.3080963869 | C,0,-2.9576503047,-0.9710910617,-0.69196139   |
| C,0,-1.6616878635,-2.5861055329,0.1213472185  | C,0,-2.7442265284,0.3130291815,-1.1818789043  |
| H,0,-2.5171660827,-2.9334601467,-0.4658597112 | C,0,-3.2282606582,1.438673624,-0.509080843    |
| H,0,-1.894107812,-2.8095624942,1.169712408    | C,0,-3.9148937886,1.226407708,0.6847341757    |
| C,0,-1.544168914,-1.1075682088,-0.0308225654  | C,0,-4.1236727534,-0.0574852146,1.1755669295  |
| C,0,-2.4978046095,-0.1330673808,-0.0917601641 | C,0,-3.6583603119,-1.1801618014,0.4953108376  |
| C,0,-3.9436891007,-0.240068426,0.1161135596   | H,0,-2.567320261,-1.8199061491,-1.2404092797  |
| C,0,-4.8020313004,0.6751253399,-0.5168165136  | H,0,-2.1923957652,0.4414393775,-2.1049209209  |
| C,0,-4.5196749555,-1.2429976029,0.910705409   | H,0,-4.2934915388,2.0668726718,1.2502819336   |
| C,0,-6.1773072854,0.5773739416,-0.3765036613  | H,0,-4.666474665,-0.1863607803,2.106071962    |
| H,0,-4.3814766485,1.4560973593,-1.1363252202  | C,0,-3.9057913176,-2.5653223815,1.0324145806  |
| C,0,-5.8962095701,-1.3331483568,1.0562258915  | H,0,-3.5597999944,-3.3284713025,0.3362947232  |
| H,0,-3.8863029872,-1.9397400498,1.4391022664  | H,0,-3.3852496022,-2.7235155418,1.9816278739  |
| C,0,-6.7319777448,-0.4273539518,0.4108604567  | H,0,-4.9690308579,-2.732305235,1.2197878028   |
| H,0,-6.8193786449,1.2850415003,-0.8854910368  | C,0,-3.0199825296,2.8133422597,-1.1201156399  |
| H,0,-6.3185337742,-2.1104322058,1.680532      | H,0,-1.9835612074,2.8405165558,-1.4717317978  |
| H,0,-7.806045954,-0.50140173,0.5231951495     | C,0,-3.925739672,2.9934711134,-2.3505788282   |
| C,0,1.6304287606,1.4013702536,3.7755405709    | H,0,-3.7355901808,3.9559805321,-2.8313793125  |
| H,0,2.2827391264,2.1860578632,3.3862566141    | H,0,-3.7590869039,2.207180325,-3.0878215606   |
| H,0,0.7037990676,1.8770567635,4.0957497773    | H,0,-4.9780127932,2.9614596088,-2.0569619008  |
| H,0,2.1190103032,0.9073538279,4.6116257091    | C,0,-3.2175710885,3.9724844123,-0.1411718958  |
| C,0,1.3537447351,0.4214569074,2.6608051172    | H,0,-2.610590297,3.8489792195,0.7557636273    |
| O,0,1.8685248459,-0.7132206628,2.694361391    | H,0,-2.9369589795,4.9137906104,-0.6177855624  |
| O,0,0.5974097248,0.862681651,1.7235682835     | H,0,-4.2643143365,4.0629733389,0.1601212435   |
| H,0,1.6161183239,-1.422890182,1.4086661794    | Ru,0,0.3564387382,-0.1026349318,-0.1068417158 |
|                                               | C,0,0.2603815681,-3.9019433763,-1.8765778072  |



---

|                                               |                                               |
|-----------------------------------------------|-----------------------------------------------|
| C,0,-0.3978485123,-4.7984157385,-1.0506828886 | C,0,5.8886234859,0.1588700485,0.5012381222    |
| C,0,-0.78311214,-4.3956811757,0.2303902265    | H,0,4.5491171718,-1.3317199242,1.2644251091   |
| C,0,-0.4455021069,-3.1421800626,0.7071278903  | C,0,4.8730134973,1.9370888895,-0.7764071726   |
| C,0,0.3013935381,-2.2423442588,-0.0762440821  | H,0,2.7316780055,1.8302153747,-0.9957732089   |
| C,0,0.5832208575,-2.6336071933,-1.4038908569  | C,0,6.0067198424,1.3350575958,-0.237627592    |
| H,0,0.4995094873,-4.1450323589,-2.9044927892  | H,0,6.7717397038,-0.3165517105,0.9087564349   |
| H,0,-0.6444791684,-5.791114453,-1.4051210933  | H,0,4.9682545383,2.8419127771,-1.3629267679   |
| H,0,-1.3580608886,-5.0657435227,0.8573313527  | H,0,6.982735136,1.7743578981,-0.4003046261    |
| H,0,-0.7725500509,-2.8663912125,1.6971256945  | C,0,0.4032395957,4.3512051383,-0.0166544107   |
| C,0,0.9441545434,-1.5542653888,-2.3584078359  | H,0,0.1856135867,4.5020392833,-1.0728628947   |
| O,0,1.5302139442,-1.712905087,-3.4122639278   | H,0,-0.1581847278,5.051061852,0.5970995489    |
| N,0,0.4913259412,-0.3163198048,-1.9113043068  | H,0,1.4715102087,4.5264552781,0.1303354721    |
| O,0,-0.7548061261,0.2949474125,1.637101337    | C,0,0.0958278896,2.9257325597,0.3769169441    |
| C,0,-0.6773266974,-0.3532262324,2.902906799   | O,0,0.4227631036,2.0318105997,-0.4608691887   |
| H,0,-1.2886764112,-1.2566438383,2.8493988484  | O,0,-0.4421941118,2.7147921675,1.4969577154   |
| H,0,-1.1400215302,0.3076254013,3.6405027391   | H,0,-0.685146138,1.3616914987,1.6843966838    |
| C,0,0.7542046051,-0.6675001791,3.3335673341   |                                               |
| H,0,0.7341573945,-1.0187300747,4.3692381134   | <b><sup>3</sup>TS8</b>                        |
| H,0,1.3239021758,0.2650223853,3.3191261517    | C,0,-2.9270965856,-0.9718318844,-0.6898392459 |
| C,0,1.4927396357,-1.7186916966,2.472914506    | C,0,-2.6773184204,0.2960947146,-1.2078842483  |
| H,0,2.5307311038,-1.7708146074,2.8102751992   | C,0,-3.1560244642,1.4483731242,-0.5734933362  |
| H,0,1.0655120245,-2.7075647423,2.6235770483   | C,0,-3.8571379197,1.2795775471,0.6177219792   |
| C,0,1.5146121084,-1.3290178921,1.0256645206   | C,0,-4.09908163,0.0128599181,1.1370340882     |
| C,0,2.2087201594,-0.3841812828,0.3984137701   | C,0,-3.6538333672,-1.1360631126,0.4896167367  |
| C,0,3.4901016237,0.2012833284,0.1786895688    | H,0,-2.552921721,-1.8418711796,-1.2147231854  |
| C,0,4.6432754373,-0.408491946,0.7072148805    | H,0,-2.1275373702,0.3888700946,-2.1371597413  |
| C,0,3.6202972938,1.3789491317,-0.5762736991   | H,0,-4.2285078598,2.1409966295,1.1558911688   |

---

|                                               |                                              |
|-----------------------------------------------|----------------------------------------------|
| H,0,-4.6566658172,-0.080934715,2.0627919419   | O,0,1.634917641,-1.8815083396,-3.3914171343  |
| C,0,-3.9582064034,-2.5009557919,1.0486701634  | N,0,0.682066275,-0.4187082283,-1.8667242576  |
| H,0,-3.6191983142,-3.2898193761,0.378662756   | O,0,-0.7198426553,0.2611286743,1.8374798196  |
| H,0,-3.4702952117,-2.6536164706,2.0157556531  | C,0,-0.5336388504,-0.4314467991,3.0712121264 |
| H,0,-5.0312068408,-2.6287359683,1.209047983   | H,0,-1.1792566686,-1.3120678756,3.0468137518 |
| C,0,-2.9415509803,2.8001590406,-1.2286174193  | H,0,-0.8958419386,0.2116263973,3.8774648242  |
| H,0,-1.9136008385,2.8017299221,-1.6011310624  | C,0,0.9167175157,-0.8222975026,3.3466682095  |
| C,0,-3.8762835317,2.9582427764,-2.4401881948  | H,0,0.9722309627,-1.229810471,4.3606396017   |
| H,0,-3.6853064378,3.9041673735,-2.9525556816  | H,0,1.5268325264,0.0839526602,3.327609196    |
| H,0,-3.7375185048,2.1494374846,-3.1587841309  | C,0,1.517624817,-1.854552932,2.3691925905    |
| H,0,-4.9215332923,2.9486579788,-2.1211839542  | H,0,2.5705382696,-1.9994432486,2.6244085324  |
| C,0,-3.1011288069,3.9875145093,-0.2767284561  | H,0,1.0306301978,-2.8210766378,2.4779525414  |
| H,0,-2.4984183963,3.8698388781,0.6243745925   | C,0,1.4769909518,-1.3505971539,0.958859121   |
| H,0,-2.7955793213,4.909724433,-0.7741792518   | C,0,2.1123558202,-0.3503641826,0.3868739381  |
| H,0,-4.1425390226,4.1153976039,0.0289010369   | C,0,3.365138612,0.2911550379,0.1600150035    |
| Ru,0,0.2273823584,-0.0838146052,-0.1190215493 | C,0,4.5539131001,-0.306232671,0.6189815547   |
| C,0,0.2724764502,-3.9671569799,-1.8305779953  | C,0,3.4350054152,1.5214558408,-0.5138800135  |
| C,0,-0.4437079211,-4.8371996842,-1.0176572392 | C,0,5.7714841337,0.3235898253,0.4280920003   |
| C,0,-0.8955286035,-4.3993657123,0.226153064   | H,0,4.5092763023,-1.2680751289,1.113488677   |
| C,0,-0.5872771706,-3.1264474438,0.6810149879  | C,0,4.6594766418,2.1421921378,-0.7012890949  |
| C,0,0.1856512308,-2.2515343179,-0.0945345485  | H,0,2.5230468142,1.9605317865,-0.893559951   |
| C,0,0.5645224436,-2.6871148859,-1.3851697651  | C,0,5.8283705203,1.5514657139,-0.2287983496  |
| H,0,0.5804134099,-4.2427096138,-2.8314871825  | H,0,6.6809233213,-0.143927357,0.7835717907   |
| H,0,-0.6774597028,-5.8372492705,-1.3597981333 | H,0,4.7058399509,3.0873888673,-1.2270048759  |
| H,0,-1.4984582923,-5.0526848743,0.8445254525  | H,0,6.7826571501,2.0393113908,-0.3811212889  |
| H,0,-0.9605114245,-2.8144245253,1.6439624845  | C,0,0.4182932048,4.3010127566,0.063306057    |
| C,0,1.0706201741,-1.6374763378,-2.3383511634  | H,0,0.0520013331,4.4708923512,-0.9474711771  |

---

|                                              |                                               |
|----------------------------------------------|-----------------------------------------------|
| H,0,0.0160130791,5.0409225454,0.750757026    | H,0,4.0072768637,-2.2003651984,-3.2173421768  |
| H,0,1.5070230658,4.3928417992,0.0444432234   | C,0,2.6318849658,-3.7456041638,-1.3298493292  |
| C,0,0.073418877,2.9049417899,0.5247610427    | H,0,2.2262376312,-3.9105499189,-0.3320587293  |
| O,0,0.1370301415,2.0004779019,-0.3785818585  | H,0,2.1788233903,-4.4761279871,-2.0020933814  |
| O,0,-0.2248009435,2.7100827512,1.7208230352  | H,0,3.7063359694,-3.946832541,-1.2996299519   |
| H,0,-0.5662744778,1.2748900216,1.9327187344  | Ru,0,-0.050734334,0.1641144498,0.1336684617   |
|                                              | C,0,0.4196718833,2.8846081244,-2.2141076562   |
| <b>'TS9</b>                                  | C,0,0.8508447021,4.0508480716,-1.6421929652   |
| C,0,2.8234328722,1.134616194,-0.3016034848   | C,0,0.418280235,4.3941531866,-0.3462210979    |
| C,0,2.4475562774,0.0955455267,-1.1491572927  | C,0,-0.4176889038,3.5615423045,0.3408386049   |
| C,0,2.7988090032,-1.2407195259,-0.8753458544 | C,0,-0.8800501995,2.3284227936,-0.218245789   |
| C,0,3.5315850254,-1.4732173619,0.2825637618  | C,0,-0.444032414,1.9845694809,-1.5422296938   |
| C,0,3.8957085072,-0.4300654288,1.1344202625  | H,0,0.6971949664,2.6234272327,-3.2261660347   |
| C,0,3.5459896528,0.8869415892,0.8669882758   | H,0,1.5088126628,4.7161214322,-2.1869944385   |
| H,0,2.5468671137,2.1498102211,-0.5569135185  | H,0,0.740011585,5.3246461799,0.1039972459     |
| H,0,1.9334225002,0.3224608246,-2.071807037   | H,0,-0.7529745532,3.8575522932,1.3227569159   |
| H,0,3.8217256531,-2.479470974,0.5504148939   | C,0,-0.8222530255,0.7529829707,-2.3901304146  |
| H,0,4.448191231,-0.6598597196,2.0381877384   | O,0,-1.1546477284,0.9422202839,-3.56677237    |
| C,0,3.8718327865,2.0112027312,1.8088350145   | N,0,-0.6174597591,-0.3926508733,-1.7546682561 |
| H,0,4.395561126,2.8222826622,1.2971910114    | O,0,0.848445219,0.6523248736,2.1414354337     |
| H,0,2.949557091,2.4255526218,2.223567405     | C,0,0.1183211762,1.4042505464,3.1127962913    |
| H,0,4.4954049822,1.6748175464,2.6374226585   | H,0,0.3146612644,2.4598024651,2.9135652386    |
| C,0,2.3367389577,-2.3300837476,-1.8235467335 | H,0,0.5360360333,1.1718818607,4.0962579118    |
| H,0,1.2494964495,-2.2152145556,-1.8927292851 | C,0,-1.3832479844,1.1147109223,3.125954396    |
| C,0,2.9165241372,-2.1268060398,-3.232986575  | H,0,-1.7953122023,1.4613052067,4.0778161745   |
| H,0,2.5327084101,-2.8904325783,-3.9125185207 | H,0,-1.5179699842,0.0306491306,3.0993156911   |
| H,0,2.6465586876,-1.1555152083,-3.6469941809 | C,0,-2.1899018326,1.7687287986,1.9882278155   |

---

|                                               |                                               |
|-----------------------------------------------|-----------------------------------------------|
| H,0,-3.2259720386,1.4363763557,2.0717029555   | C,0,-3.4190044153,-0.7373814831,-0.2731421146 |
| H,0,-2.2060340941,2.8494271263,2.1234965021   | C,0,-3.7241911767,-1.1630234071,1.0170774504  |
| C,0,-1.6843600983,1.4182458065,0.5986414149   | C,0,-2.9628892092,-2.1361242232,1.6599731754  |
| C,0,-1.8949400635,0.110424337,0.0966118906    | C,0,-1.8618860135,-2.7209250988,1.0447725904  |
| C,0,-3.0051475597,-0.7632871744,-0.0757443756 | H,0,-0.747203244,-2.7905170256,-0.7961446313  |
| C,0,-4.3142025058,-0.2585065795,0.031648673   | H,0,-2.0902681266,-1.0958630141,-1.9416493537 |
| C,0,-2.8088008467,-2.1233684439,-0.3790676821 | H,0,-4.5515173509,-0.7160135851,1.5510700448  |
| C,0,-5.4011573233,-1.1002915201,-0.127185849  | H,0,-3.2226047619,-2.4255348308,2.6718918778  |
| H,0,-4.4646478228,0.795956394,0.220811908     | C,0,-1.0056842305,-3.7484432534,1.7319640645  |
| C,0,-3.9017466627,-2.956863619,-0.5308741546  | H,0,-1.1722924593,-4.7436301602,1.3113138429  |
| H,0,-1.7986391614,-2.4779901453,-0.5100040948 | H,0,0.0547966031,-3.5210596507,1.6008017303   |
| C,0,-5.1943647788,-2.4504052357,-0.4016759229 | H,0,-1.219732434,-3.7985563237,2.8001938919   |
| H,0,-6.4070454944,-0.7089153287,-0.0495091759 | C,0,-4.2048003847,0.3283392192,-1.012262272   |
| H,0,-3.7528291994,-4.002253083,-0.7678243212  | H,0,-3.47137918,0.89845065,-1.5902635323      |
| H,0,-6.045296215,-3.1077443585,-0.5305792223  | C,0,-5.1855441958,-0.3202054011,-2.0027312113 |
| C,0,0.3181911732,-3.897435044,1.7418038371    | H,0,-5.7051055393,0.4435717028,-2.5856666377  |
| H,0,0.2128926892,-4.3047847204,0.7397148682   | H,0,-4.6679224321,-0.9837717552,-2.6970277578 |
| H,0,1.1776572503,-4.3369161279,2.2462636861   | H,0,-5.9351936864,-0.9091859325,-1.4683117358 |
| H,0,-0.5718162047,-4.1474577001,2.323678507   | C,0,-4.9297000787,1.3123761754,-0.0915588487  |
| C,0,0.4515619811,-2.3907048121,1.7127216927   | H,0,-4.2576320691,1.7338857087,0.6567879035   |
| O,0,0.1257528523,-1.8417983127,0.6031300863   | H,0,-5.3455093087,2.1335151435,-0.6782555468  |
| O,0,0.8284557632,-1.7963713158,2.7398600116   | H,0,-5.7628737851,0.8358443558,0.4307234358   |
| H,0,0.9270870487,-0.3087656013,2.4768649099   | Ru,0,-0.3064381167,0.1993951289,0.075260334   |
|                                               | C,0,2.4899546642,-3.0868383057,-1.9591959915  |
| <b><sup>3</sup>TS9</b>                        | C,0,3.3484340634,-3.9438459634,-1.2861733051  |
| C,0,-1.5595554387,-2.3148109777,-0.261967496  | C,0,3.5846230243,-3.7335396385,0.0644474523   |
| C,0,-2.3289924175,-1.3478552219,-0.9141977573 | C,0,2.9811061778,-2.6683279785,0.7215667755   |

---

|                                              |                                               |
|----------------------------------------------|-----------------------------------------------|
| C,0,2.1324772037,-1.7729209402,0.0548134735  | H,0,0.9227143594,2.8781110328,-1.2033757448   |
| C,0,1.8806943198,-2.0131409576,-1.3146399458 | C,0,4.1801571634,3.7608052447,-0.7978715983   |
| H,0,2.2508738485,-3.2433878295,-3.0022961728 | H,0,5.673080017,2.5702427644,0.1907271453     |
| H,0,3.8153724585,-4.7701341155,-1.8066340734 | H,0,2.5063728316,4.7233316116,-1.7445479111   |
| H,0,4.2412049196,-4.3952642773,0.6160073406  | H,0,4.8699920621,4.5603621514,-1.0375458009   |
| H,0,3.195444285,-2.5353003116,1.7711200479   | C,0,-2.2948154569,4.1785985288,-0.4474624145  |
| C,0,0.8925149136,-1.2194309787,-2.1498172707 | H,0,-2.8983836071,4.7784529718,0.2292134404   |
| O,0,0.4334647828,-1.7072808139,-3.1855188833 | H,0,-1.4420633396,4.7686448758,-0.7904284426  |
| N,0,0.5393876201,0.0127730871,-1.7410897584  | H,0,-2.869859187,3.8956892375,-1.3285996034   |
| O,0,-1.2079665177,0.5010358463,1.9902559769  | C,0,-1.7791213695,2.9399493081,0.2497593722   |
| C,0,-0.5413379731,0.1861847252,3.2103980633  | O,0,-1.2621816387,2.0559579709,-0.5135840432  |
| H,0,-0.75519709,-0.863130655,3.430229244     | O,0,-1.8744182525,2.8549719904,1.4942013686   |
| H,0,-0.9854042377,0.7958882047,4.0013749823  | H,0,-1.4793302849,1.4947524353,1.9338653066   |
| C,0,0.9639298765,0.4185359694,3.1480443624   |                                               |
| H,0,1.347249453,0.3815233233,4.1718473325    | <b><sup>1</sup>TS10</b>                       |
| H,0,1.1529321843,1.4315629218,2.782071191    | C,0,-0.5602039333,-0.7487943333,-2.4453856625 |
| C,0,1.72914199,-0.6251958524,2.3260690337    | C,0,-1.4266493049,0.3248857774,-2.1588365641  |
| H,0,2.7969614377,-0.5101877198,2.5459213128  | C,0,-2.5956572473,0.1249222474,-1.4152386188  |
| H,0,1.4479297862,-1.615741002,2.6934223576   | C,0,-2.9027416728,-1.1981667792,-1.0224248162 |
| C,0,1.543702574,-0.6109660146,0.8064619974   | C,0,-2.0656948733,-2.2532960206,-1.3294794544 |
| C,0,1.5073856205,0.6571573909,0.1599320616   | C,0,-0.8619898485,-2.0506460657,-2.0293487273 |
| C,0,2.4053153923,1.7080892621,-0.1867492256  | H,0,0.3295846567,-0.5611528398,-3.032015219   |
| C,0,3.7547651787,1.6142653537,0.1948368318   | H,0,-1.1654025617,1.3103382886,-2.5149925952  |
| C,0,1.9575977346,2.8395547769,-0.8923031802  | H,0,-3.777284804,-1.3725495358,-0.4134526267  |
| C,0,4.6343154119,2.6418269606,-0.1045423879  | H,0,-2.3166101986,-3.249250766,-0.9869597738  |
| H,0,4.0964573453,0.7293803709,0.7154251089   | C,0,0.0621560769,-3.2045944178,-2.2994554879  |
| C,0,2.8455827064,3.8551552974,-1.194476272   | H,0,0.7415518285,-2.9928468539,-3.1248442293  |

---

|                                               |                                              |
|-----------------------------------------------|----------------------------------------------|
| H,0,0.6682214516,-3.4249353585,-1.4168613992  | C,0,-2.1349019371,-1.2656988668,3.0663799495 |
| H,0,-0.5022985506,-4.1053164733,-2.5441235674 | H,0,-2.4034106027,-2.3442490718,3.0960783025 |
| C,0,-3.5222055101,1.246360351,-0.9943265825   | H,0,-2.8275330208,-0.7662416713,3.7652273144 |
| H,0,-3.6368329875,1.1208827495,0.0877125834   | C,0,-0.7141600832,-1.1250334878,3.6245029423 |
| C,0,-2.9605228808,2.6450389938,-1.2435727044  | H,0,-0.6904692537,-1.540208421,4.6370796126  |
| H,0,-3.6341063636,3.3912415167,-0.8205080373  | H,0,-0.4682505454,-0.0640975817,3.7036836084 |
| H,0,-1.9848693905,2.7751394919,-0.7758145254  | C,0,0.3429779139,-1.8544816385,2.7858861989  |
| H,0,-2.8669605631,2.8581334887,-2.3121946998  | H,0,1.2741642268,-1.951839655,3.3540593479   |
| C,0,-4.9021249697,1.0890896536,-1.6543896298  | H,0,-0.0066705132,-2.8756769545,2.5885471956 |
| H,0,-5.3454136804,0.113995606,-1.4487943094   | C,0,0.6819191885,-1.240838021,1.4854744559   |
| H,0,-5.5856913734,1.8525356197,-1.2788570747  | C,0,1.4874018647,-1.0498361389,0.5235577336  |
| H,0,-4.8286228088,1.2044739641,-2.7387871885  | C,0,2.8333998863,-1.1136250251,0.0057099102  |
| Ru,0,-0.358673021,-0.1613559871,0.0652763172  | C,0,3.1006217111,-1.3398669376,-1.3484542336 |
| C,0,1.2817353393,3.6277478605,0.9574867732    | C,0,3.9137889903,-0.945651397,0.8835137935   |
| C,0,2.2203260978,3.9356246384,-0.0195729594   | C,0,4.4056220987,-1.4089432288,-1.8126198246 |
| C,0,2.4620428955,3.0306609978,-1.0515273296   | H,0,2.2748377839,-1.4603957707,-2.0338738763 |
| C,0,1.7878160056,1.8104432477,-1.1136742729   | C,0,5.2184484253,-1.0106909626,0.4165002829  |
| C,0,0.8359930396,1.4944112116,-0.1505774302   | H,0,3.7161764068,-0.7486023659,1.9288791018  |
| C,0,0.599611204,2.4200838254,0.87370309       | C,0,5.4703352929,-1.243317765,-0.9321458932  |
| H,0,1.0677570876,4.3021715854,1.7776346913    | H,0,4.5941106254,-1.5890268217,-2.8636300523 |
| H,0,2.7610827378,4.8726315302,0.0182422282    | H,0,6.041723145,-0.8727170347,1.1060255497   |
| H,0,3.1915710442,3.2722821447,-1.8157908778   | H,0,6.4890239464,-1.2909237255,-1.2950959766 |
| H,0,2.0247089492,1.1181558979,-1.9105166071   |                                              |
| C,0,-0.4425711692,1.9833240672,1.8546360416   | <b><sup>1</sup>TS10b</b>                     |
| O,0,-0.6377278518,2.4266098832,2.9661492495   | C,0,-0.6597717759,0.8643139545,1.2311683269  |
| N,0,-1.1841681851,0.9941656098,1.1971912231   | C,0,0.0498674705,1.3895141263,0.1219719293   |
| O,0,-2.2891784749,-0.7971623512,1.7825901893  | C,0,1.246596423,2.11640537,0.2897296085      |

---

|                                              |                                               |
|----------------------------------------------|-----------------------------------------------|
| C,0,1.7094150635,2.3160780695,1.6230959911   | C,0,2.4851371879,-1.8342753036,-1.3918383802  |
| C,0,1.0459805612,1.7584559423,2.7009662477   | H,0,3.3850000174,-2.9996245071,-2.9502058811  |
| C,0,-0.1433904504,0.9955167238,2.5206784986  | H,0,1.186802147,-3.5048832515,-4.0355561284   |
| H,0,-1.5756922355,0.3131304221,1.0673587194  | H,0,-0.892114759,-2.6071397937,-3.0390701476  |
| H,0,-0.3588114699,1.251269166,-0.8680992163  | H,0,-0.8378218411,-1.2408969437,-1.0102722142 |
| H,0,2.6223692921,2.8755803295,1.7817841385   | C,0,3.7047808257,-1.507690234,-0.6540072069   |
| H,0,1.4447757155,1.8816526913,3.6996237346   | O,0,4.8359526859,-1.8726275432,-0.8843113241  |
| C,0,-0.8481604626,0.4108787158,3.7105915973  | N,0,3.4343317066,-0.6185281352,0.476317524    |
| H,0,-1.4820181778,-0.4244485643,3.420755779  | O,0,2.8234072089,-1.8697627801,1.7995667445   |
| H,0,-0.1336366512,0.0593409727,4.4559518876  | C,0,2.6964987177,-3.2691703732,1.6222660067   |
| H,0,-1.4734897447,1.1706512781,4.1881699325  | H,0,3.1926778213,-3.7220554644,2.4911730037   |
| C,0,1.9741308116,2.7911937131,-0.8570679364  | H,0,3.2503934125,-3.6048265013,0.7372774183   |
| H,0,3.0392313783,2.7508935635,-0.6106078169  | C,0,1.2494510324,-3.7357085627,1.5128475048   |
| C,0,1.785125913,2.1031260017,-2.2090041053   | H,0,1.2240417517,-4.827436442,1.4707437932    |
| H,0,2.4275818665,2.5737949491,-2.9543827639  | H,0,0.8416381343,-3.3731915685,0.5720884826   |
| H,0,2.036811141,1.0446075093,-2.1556498537   | C,0,0.3653468676,-3.2233137324,2.6746268958   |
| H,0,0.7567017257,2.1911122924,-2.5667034898  | H,0,0.3421632264,-3.9462585498,3.4951582476   |
| C,0,1.5574556039,4.2702637486,-0.9261991152  | H,0,0.8133647118,-2.3117024348,3.0839305093   |
| H,0,1.7360049946,4.7833111484,0.0205756671   | C,0,-0.982424751,-2.9037497621,2.2296306702   |
| H,0,2.1213098732,4.7877533539,-1.7044727662  | C,0,-2.0405452501,-2.5670853782,1.7613960444  |
| H,0,0.4941367906,4.3589121652,-1.1621852407  | C,0,-3.2407791729,-2.0989992635,1.155345968   |
| Ru,0,1.6441933517,-0.2455785601,0.8473660821 | C,0,-4.1848873469,-1.3660907496,1.8899440628  |
| C,0,2.4541196231,-2.6208062938,-2.5453049226 | C,0,-3.478488296,-2.3281207263,-0.2091581876  |
| C,0,1.2368857528,-2.8970256414,-3.1413521169 | C,0,-5.3270837074,-0.8731023675,1.274812262   |
| C,0,0.0623450143,-2.3846876131,-2.5744147218 | H,0,-4.012929042,-1.189852456,2.9437780686    |
| C,0,0.0935989633,-1.6019988196,-1.4288457477 | C,0,-4.6229117804,-1.8324811326,-0.8165501057 |
| C,0,1.3159978167,-1.3086855317,-0.8021901827 | H,0,-2.7548571122,-2.8955770775,-0.778997043  |

---

|                                               |                                               |
|-----------------------------------------------|-----------------------------------------------|
| C,0,-5.5504056778,-1.1019641119,-0.0792817329 | H,0,-3.6373147182,-3.2291308807,2.1836559806  |
| H,0,-6.0467520518,-0.3092842324,1.8550017985  | H,0,-5.1291105813,-2.2932071797,2.0226506033  |
| H,0,-4.7927328082,-2.0175665226,-1.8698125448 | H,0,-4.4570454214,-3.1354420575,0.6217535865  |
| H,0,-6.4424502264,-0.7164263743,-0.5560818653 | Ru,0,-0.3301604733,-0.4427425962,-0.086317703 |
|                                               | C,0,-0.7664881721,3.0309404981,-2.5784611736  |
| <b>'TS11</b>                                  | C,0,-0.1724244184,2.7265658341,-3.7940989038  |
| C,0,-0.6181098744,-2.2001443371,-1.3693243726 | C,0,0.4098920799,1.4725523304,-3.9732303417   |
| C,0,-1.8916558672,-1.8442314262,-0.846461026  | C,0,0.390774289,0.5284208282,-2.949753517     |
| C,0,-2.0726955298,-1.7242117983,0.5474887786  | C,0,-0.2072164069,0.8088379285,-1.7163992929  |
| C,0,-0.9888170332,-2.0768760507,1.4116761253  | C,0,-0.7761749038,2.0825712684,-1.5573495034  |
| C,0,0.2570167786,-2.4183784988,0.8749506664   | H,0,-1.2296296863,3.993077974,-2.3960301696   |
| C,0,0.4771112596,-2.5047706202,-0.534231021   | H,0,-0.1575078871,3.4549145807,-4.595101212   |
| H,0,-0.4803449222,-2.2128955052,-2.4423003631 | H,0,0.8831721862,1.2285978633,-4.9179039851   |
| H,0,-2.6895767937,-1.588274435,-1.5262915264  | H,0,0.8672438448,-0.4303732227,-3.1205666841  |
| H,0,-1.1175028836,-2.0068014123,2.4829123441  | C,0,-1.3907403916,2.4018627219,-0.2455907777  |
| H,0,1.0943358573,-2.5903808742,1.5402128061   | O,0,-1.9748868928,3.4385754239,0.0353279459   |
| C,0,1.7958826128,-2.9502862258,-1.0947336018  | N,0,-1.1548423351,1.3574301135,0.6289605159   |
| H,0,1.9635874201,-2.5275112489,-2.0850738614  | O,0,-1.9230438981,1.4481004837,1.8145256833   |
| H,0,2.624000169,-2.6461095612,-0.4567573329   | C,0,-1.1259788104,1.3346693954,2.9842416024   |
| H,0,1.8203285308,-4.0402366389,-1.1845578317  | H,0,-0.5752316224,0.3861749913,2.9618389131   |
| C,0,-3.3958633754,-1.3101063284,1.1574675868  | H,0,-1.848482816,1.2879272553,3.8002114674    |
| H,0,-3.1565300824,-0.7755411043,2.079014407   | C,0,-0.1604201994,2.4931617745,3.1928564409   |
| C,0,-4.2152839041,-0.3609268455,0.2832175965  | H,0,0.4619207253,2.2543863291,4.0594468218    |
| H,0,-5.0833567117,-0.0063373331,0.8406177701  | H,0,-0.7149769,3.4039038712,3.4199075886      |
| H,0,-3.630434946,0.5074748961,-0.0138407281   | C,0,0.7350579911,2.7578571537,1.9560741981    |
| H,0,-4.587474456,-0.8588368182,-0.6151491135  | H,0,0.2892233234,3.5385951608,1.337177206     |
| C,0,-4.1999936666,-2.5693382442,1.5203183006  | H,0,1.7242894238,3.1183252334,2.263584662     |



---

|                                               |                                               |
|-----------------------------------------------|-----------------------------------------------|
| C,0,0.9651103371,1.5712345004,1.1481651348    | H,0,2.5881590773,-2.9861431503,0.457368207    |
| C,0,1.4808312751,0.591646272,0.5601927432     | H,0,1.9135807544,-4.2444616361,-0.584632629   |
| C,0,2.8094725982,0.0437549065,0.3165545467    | C,0,-3.6940188579,-1.8266446985,0.8341762723  |
| C,0,3.4886142266,-0.6533999343,1.3201500628   | H,0,-3.8581309553,-2.0368430946,1.8954243536  |
| C,0,3.4007822404,0.173888214,-0.9433016676    | C,0,-4.0296434853,-0.3459255695,0.5938645046  |
| C,0,4.736200946,-1.2111115407,1.066336264     | H,0,-5.0809843956,-0.157265081,0.8211578269   |
| H,0,3.0314155922,-0.7585245051,2.2958144748   | H,0,-3.4195323215,0.3040052202,1.2195083522   |
| C,0,4.6519311644,-0.376084093,-1.1861550437   | H,0,-3.8592827458,-0.0663111402,-0.4477952405 |
| H,0,2.8657452284,0.6979190172,-1.7234169376   | C,0,-4.6230343277,-2.744660213,0.0254817306   |
| C,0,5.3229023605,-1.0755365535,-0.1871543036  | H,0,-4.3990222481,-3.7975085401,0.2070914796  |
| H,0,5.2511038352,-1.7505420296,1.8516061951   | H,0,-5.6649574856,-2.5640208026,0.2974600122  |
| H,0,5.1022217396,-0.2637732589,-2.1645650704  | H,0,-4.5243145861,-2.5590891309,-1.0463225107 |
| H,0,6.2945486755,-1.5100483513,-0.3837212634  | Ru,0,-0.103183532,-0.4504975808,0.0071073082  |
|                                               | C,0,-1.1629368985,3.0218661263,-2.2190132655  |
| <b><sup>3</sup>TS11</b>                       | C,0,-0.7769505471,2.7684439932,-3.5246477857  |
| C,0,-0.3735177931,-2.3152042182,-1.0910855688 | C,0,-0.1812265437,1.5451135234,-3.8383417906  |
| C,0,-1.7040818265,-1.9189348266,-0.760785648  | C,0,0.0220494891,0.5814913763,-2.8574597633   |
| C,0,-2.2406904863,-2.1226422175,0.5462298378  | C,0,-0.3487801787,0.8203660381,-1.5275687238  |
| C,0,-1.3524097711,-2.4878611075,1.5426535731  | C,0,-0.9405919001,2.0608283272,-1.2317674046  |
| C,0,0.0197601715,-2.7270135541,1.260568381    | H,0,-1.641504564,3.9522846727,-1.9392506523   |
| C,0,0.5157026579,-2.7110029348,-0.0576943676  | H,0,-0.9364244062,3.5101707147,-4.2968588222  |
| H,0,-0.0680817174,-2.3779271868,-2.1270654454 | H,0,0.1243095778,1.3423642674,-4.8585824982   |
| H,0,-2.359384391,-1.6107213479,-1.5635353321  | H,0,0.4885068871,-0.3567898501,-3.1329014704  |
| H,0,-1.6974833865,-2.566472544,2.5657327932   | C,0,-1.3782717418,2.3025740231,0.1550815578   |
| H,0,0.6940515556,-2.9722352504,2.070621657    | O,0,-2.1088112838,3.2074352217,0.5235212406   |
| C,0,1.9108612293,-3.1711189547,-0.3756462312  | N,0,-0.8561365134,1.3100390051,1.0015934001   |
| H,0,2.3095563486,-2.6527521877,-1.2472389546  | O,0,-1.4089989131,1.2625078504,2.2890872829   |

---

|                                               |                                                |
|-----------------------------------------------|------------------------------------------------|
| C,0,-1.1803624459,2.4413784995,3.1036130482   | C,0,-0.9657572418,-2.3982994099,1.2534908155   |
| H,0,-1.1966682441,2.043552257,4.1213226712    | C,0,0.2077105724,-2.7054762222,0.5757260169    |
| H,0,-2.003186696,3.1410771551,2.9655925094    | C,0,0.2797264342,-2.6092329156,-0.8532840318   |
| C,0,0.1560066448,3.1024614304,2.8093589392    | H,0,-0.8757216865,-2.2070015703,-2.6370574419  |
| H,0,0.4230523839,3.733093029,3.6601554271     | H,0,-2.9828411803,-1.6667012463,-1.438855836   |
| H,0,0.0724401192,3.7526453213,1.938820287     | H,0,-0.986335054,-2.4092320964,2.3349708587    |
| C,0,1.2483685995,2.0583880374,2.5766330751    | H,0,1.0955973933,-2.9853603524,1.1292490462    |
| H,0,2.2386301086,2.5273923013,2.5708236044    | C,0,1.5442372155,-2.9681793547,-1.5803063845   |
| H,0,1.2493263367,1.3361933645,3.4006128337    | H,0,1.5384307612,-2.5743703202,-2.5963391686   |
| C,0,1.1598149187,1.3298905459,1.294766038     | H,0,2.4211876464,-2.5686692268,-1.0709139914   |
| C,0,1.7248483084,0.5810139481,0.4433368252    | H,0,1.6537529969,-4.0548554452,-1.6432727153   |
| C,0,3.0490410163,0.1390459406,0.0462333032    | C,0,-3.3274641184,-1.4838874222,1.3356204576   |
| C,0,3.9422010369,-0.3940020077,0.9851103553   | H,0,-2.9439062134,-1.0294979681,2.2536198096   |
| C,0,3.4376082706,0.1936362984,-1.2980352935   | C,0,-4.1926275354,-0.4329513111,0.6391452179   |
| C,0,5.1867294177,-0.8643563553,0.5869296025   | H,0,-4.9814164892,-0.0990318383,1.3153604471   |
| H,0,3.6462730943,-0.4477402303,2.0252316476   | H,0,-3.6093286584,0.4403393906,0.3518515166    |
| C,0,4.6910303802,-0.2578833786,-1.6868341659  | H,0,-4.6797741951,-0.8350972063,-0.2519066255  |
| H,0,2.7434329661,0.5917635882,-2.026229507    | C,0,-4.1573003766,-2.7195198683,1.7191912989   |
| C,0,5.5681945869,-0.796223671,-0.7492769904   | H,0,-3.555223484,-3.4566992639,2.253843238     |
| H,0,5.8631305442,-1.2804801852,1.3234255162   | H,0,-4.9945317713,-2.4344997119,2.3596045541   |
| H,0,4.9808315393,-0.2001603216,-2.7287600971  | H,0,-4.5633281919,-3.201594163,0.8264997909    |
| H,0,6.5405072952,-1.1588738167,-1.0572945883  | Ru,0,-0.4412376205,-0.6206558271,-0.2236505946 |
|                                               | C,0,-1.0429553926,2.8664001082,-2.6165757282   |
| <b><sup>1</sup>TS12</b>                       | C,0,-0.4317490935,2.6095705842,-3.8243346965   |
| C,0,-0.906562131,-2.2733320103,-1.5567774882  | C,0,0.3574169657,1.4458377467,-3.9549798537    |
| C,0,-2.1097506741,-1.9589863177,-0.8759379556 | C,0,0.5451123496,0.5755422239,-2.9090358675    |
| C,0,-2.1110563683,-1.9170004753,0.5385714817  | C,0,-0.0492726265,0.8078079085,-1.6290435239   |

---

|                                              |                                               |
|----------------------------------------------|-----------------------------------------------|
| C,0,-0.8786967922,1.9851410364,-1.5403034257 | C,0,5.3874488666,0.2618007987,-0.8254865137   |
| H,0,-1.6699580317,3.7389720377,-2.4764377474 | H,0,5.259532703,-1.266403778,0.6822798662     |
| H,0,-0.5593235553,3.2795676787,-4.6637205745 | H,0,5.1969509223,1.8294546131,-2.2806350507   |
| H,0,0.8265577918,1.2307459961,-4.9089782198  | H,0,6.4503609002,0.1311258386,-0.9844236491   |
| H,0,1.1757148142,-0.293618706,-3.0438828928  |                                               |
| C,0,-1.4749931901,2.2384346864,-0.2683173275 | <b><sup>3</sup>TS12</b>                       |
| O,0,-2.3151514083,3.0298358191,0.0979193872  | C,0,-0.0651812743,-2.6561043058,-0.6306974235 |
| N,0,-0.8614369002,1.3002537069,0.7389576138  | C,0,-1.3908360015,-2.1989688076,-0.8342406763 |
| O,0,-1.4867935724,1.3238664081,1.9955255673  | C,0,-2.2409167404,-1.8505156497,0.2437425528  |
| C,0,-1.2166986638,2.5255745759,2.7720263545  | C,0,-1.6706881865,-1.9334155384,1.5384313346  |
| H,0,-1.331523423,2.1729983157,3.7981334399   | C,0,-0.3659182193,-2.4281877642,1.7685420477  |
| H,0,-1.9770338514,3.2707380372,2.5464719052  | C,0,0.4747561244,-2.7577047555,0.6823152979   |
| C,0,0.1947808289,3.0552964785,2.5265499932   | H,0,0.5463045027,-2.9103703355,-1.4853508003  |
| H,0,0.5565771938,3.5560611304,3.4259080398   | H,0,-1.7371469393,-2.0715615052,-1.8502806552 |
| H,0,0.1824229398,3.7972305685,1.7255854779   | H,0,-2.2462052362,-1.5777965569,2.3836649417  |
| C,0,1.1194734334,1.898925914,2.1270836352    | H,0,0.0231840937,-2.4572249333,2.7771019581   |
| H,0,2.1436689938,2.2292737844,1.952419578    | C,0,1.8728522372,-3.2553383728,0.9090628484   |
| H,0,1.1511245149,1.1515146094,2.9260919276   | H,0,2.5396037959,-2.9487386937,0.104887249    |
| C,0,0.5968487096,1.2908999377,0.8661001131   | H,0,2.2763200669,-2.8734828419,1.8464572333   |
| C,0,1.1975271109,0.7688864288,-0.2136985567  | H,0,1.8785430199,-4.3479723594,0.9560999714   |
| C,0,2.6340454033,0.6010371741,-0.4145446824  | C,0,-3.6735130117,-1.3968652022,0.0609059986  |
| C,0,3.3544753446,-0.3578959562,0.3095365814  | H,0,-3.8957158259,-0.7325210611,0.9017660312  |
| C,0,3.3167171352,1.3824066126,-1.3538925693  | C,0,-3.9077074845,-0.60468564,-1.227536837    |
| C,0,4.7172867908,-0.5241549973,0.1091891729  | H,0,-4.9226201562,-0.2041218084,-1.2367366846 |
| H,0,2.8277734746,-0.9719039828,1.0295261638  | H,0,-3.209177136,0.2265539143,-1.3167381037   |
| C,0,4.6826552141,1.2145135291,-1.5524196559  | H,0,-3.8025644499,-1.2358634449,-2.1129521106 |
| H,0,2.7662754599,2.1172385761,-1.9258529876  | C,0,-4.6203026936,-2.6045929337,0.1489091034  |

---

|                                               |                                              |
|-----------------------------------------------|----------------------------------------------|
| H,0,-4.4918803663,-3.1450765064,1.0886128486  | C,0,0.9418208922,1.4111583501,1.0430899258   |
| H,0,-5.6612722545,-2.2820478325,0.0799164085  | C,0,1.2894357001,0.5908410489,-0.0602849282  |
| H,0,-4.4282622979,-3.3029170721,-0.6696996203 | C,0,2.516295146,0.6067858376,-0.8073586833   |
| Ru,0,-0.2857822333,-0.6480916543,0.2998300698 | C,0,2.9368623916,-0.5152362792,-1.5492728429 |
| C,0,-1.5613802315,2.810364705,-1.9192175743   | C,0,3.3271944741,1.7618820576,-0.8666441782  |
| C,0,-1.3614862047,2.4982598813,-3.2448557087  | C,0,4.1090336489,-0.4961091614,-2.2843977307 |
| C,0,-0.6432213933,1.3358602834,-3.593305006   | H,0,2.3188991281,-1.4012062327,-1.5378996683 |
| C,0,-0.1487978254,0.4956588482,-2.6147639405  | C,0,4.502175153,1.7751262617,-1.5995411256   |
| C,0,-0.3598346478,0.7679349157,-1.2538410896  | H,0,3.0049091427,2.659913775,-0.3575661434   |
| C,0,-1.0662632714,1.959160748,-0.9139538986   | C,0,4.9082183823,0.6466217172,-2.309511905   |
| H,0,-2.1033337211,3.6999483601,-1.6228587274  | H,0,4.4069809133,-1.3760025771,-2.8419340044 |
| H,0,-1.743291614,3.1491017288,-4.0210552912   | H,0,5.1024761689,2.6764361419,-1.6293820107  |
| H,0,-0.4727323732,1.102290772,-4.6371935133   | H,0,5.8269160852,0.6604358222,-2.8814916535  |
| H,0,0.4223270388,-0.3786680937,-2.9004254979  |                                              |
| C,0,-1.2571850282,2.2526290164,0.4792437689   | <b><sup>1</sup>TS13</b>                      |
| O,0,-1.8397125579,3.1596435525,1.0379733977   | C,0,0.4901479699,2.424772604,0.9266222686    |
| N,0,-0.4831710295,1.2208701256,1.282981138    | C,0,1.395873897,2.6725272037,-0.1307867292   |
| O,0,-0.8378705309,1.1636250731,2.6493032306   | C,0,2.7229374631,2.1699323314,-0.1356704265  |
| C,0,-0.4234307105,2.3122321057,3.444079553    | C,0,3.0253151255,1.279513318,0.8984703625    |
| H,0,-0.2163220433,1.8664805484,4.4192905163   | C,0,2.123192022,0.9967383769,1.9635737556    |
| H,0,-1.2627893146,3.0013975357,3.5209607768   | C,0,0.8529508014,1.5792112338,2.0130556571   |
| C,0,0.8165387586,3.0088622919,2.8909886997    | H,0,-0.4863490333,2.8812529464,0.9079188029  |
| H,0,1.3509442661,3.4855469293,3.7147104458    | H,0,1.0524008927,3.2809961653,-0.9561246965  |
| H,0,0.5156374819,3.7921570777,2.194161679     | H,0,3.9749278309,0.759901713,0.8829350227    |
| C,0,1.7202686652,2.0067356516,2.1631845006    | H,0,2.4054282558,0.2671753485,2.7100038475   |
| H,0,2.627383848,2.4845032122,1.7927876252     | C,0,-0.1111951929,1.3220022615,3.1291108946  |
| H,0,2.0483052689,1.2255844802,2.8658110112    | H,0,-1.1061283277,1.1278034858,2.7284674295  |

---

|                                              |                                               |
|----------------------------------------------|-----------------------------------------------|
| H,0,0.1963560957,0.4643154329,3.7260408686   | C,0,-0.4816717447,-2.1437698135,-2.339638755  |
| H,0,-0.1713315532,2.1956996043,3.7827827829  | H,0,-0.4503857259,-2.9057242854,-3.1256571237 |
| C,0,3.7098729821,2.5118959002,-1.2298536785  | H,0,-1.4615692196,-1.6732927263,-2.3874661291 |
| H,0,4.6375895397,1.9812883945,-0.995337736   | C,0,-0.238861619,-2.8328192165,-0.9952997944  |
| C,0,3.2347911766,2.0348371561,-2.6089905021  | H,0,0.7973705002,-3.1621680722,-0.962479127   |
| H,0,3.9706097435,2.3035435953,-3.3694678212  | H,0,-0.834823233,-3.7492711183,-1.0373001763  |
| H,0,3.0933376611,0.9548925523,-2.6230992733  | C,0,-0.6104811957,-2.113790259,0.3453930457   |
| H,0,2.2838991245,2.4947266053,-2.8835564809  | H,0,-1.5541658267,-2.5350805214,0.6897790471  |
| C,0,4.0155375197,4.0170712911,-1.2297460958  | H,0,0.1446936186,-2.3892916697,1.0814865819   |
| H,0,4.3725747072,4.3545274327,-0.2547977316  | C,0,-0.7467687125,-0.610591525,0.2684672528   |
| H,0,4.7806014045,4.2481910633,-1.9730558677  | C,0,-1.9697833679,-0.0337865968,0.2490034378  |
| H,0,3.124094073,4.5962022609,-1.4818569517   | C,0,-3.2309709973,-0.7754952888,0.5633377467  |
| Ru,0,1.0029527069,0.4509730685,-0.0213571523 | C,0,-3.475665444,-1.2862393671,1.8402579738   |
| C,0,-1.8827846869,3.1986869155,-1.7400137572 | C,0,-4.2161632742,-0.9339622527,-0.4161874498 |
| C,0,-2.6542732594,4.0405835015,-0.9469766508 | C,0,-4.6615203211,-1.9524444179,2.1289606382  |
| C,0,-3.2427705996,3.5428541545,0.2126174739  | H,0,-2.7214199579,-1.1603164723,2.6077176186  |
| C,0,-3.0405107041,2.2200744242,0.5855764592  | C,0,-5.3995808633,-1.6033153853,-0.1320383685 |
| C,0,-2.2131592462,1.3763128895,-0.1617600999 | H,0,-4.0444379733,-0.5303118713,-1.4069530498 |
| C,0,-1.6646695989,1.8828447487,-1.3514501868 | C,0,-5.6271736764,-2.1155020011,1.1421311001  |
| H,0,-1.4658365954,3.5504389299,-2.6754599122 | H,0,-4.8319185873,-2.3415748497,3.1254170676  |
| H,0,-2.8169511672,5.0686682563,-1.2444005556 | H,0,-6.1465779432,-1.7254929661,-0.9066866282 |
| H,0,-3.8651770919,4.1849590694,0.8232876584  | H,0,-6.5512623591,-2.6342207307,1.3642179758  |
| H,0,-3.5166952613,1.8317175285,1.4773656142  | C,0,4.0083133623,-2.6700598493,-0.1776647181  |
| C,0,-0.956292018,0.9128465289,-2.273774556   | H,0,4.5765768977,-3.1575415706,-0.9658193925  |
| O,0,-1.4857075987,0.5898364675,-3.3254867191 | H,0,4.6804060246,-2.0541858752,0.4243860795   |
| N,0,0.2445222513,0.5574192906,-1.765196245   | H,0,3.5639619638,-3.4107677558,0.4873854674   |
| O,0,0.4577804132,-1.1325753239,-2.7497561609 | C,0,2.9259986316,-1.7901039075,-0.7684883499  |

---

|                                               |                                               |
|-----------------------------------------------|-----------------------------------------------|
| O,0,2.0700730976,-1.3567244892,0.0840922615   | H,0,6.0563151653,1.676366429,-1.9531918014    |
| O,0,2.9088831784,-1.5535990963,-1.9852073121  | Ru,0,1.3417925132,0.7201864755,-0.487213637   |
| H,0,1.4034829549,-1.3222981153,-2.4677368017  | C,0,-0.3032803379,-2.0315135746,2.6035603803  |
| <b>'TS14</b>                                  | C,0,-0.8191774869,-3.289562587,2.3287557405   |
| C,0,2.6777706181,-1.0098073255,-0.7609504203  | C,0,-1.6114597409,-3.4745056353,1.1957002015  |
| C,0,3.5729862934,0.0823912702,-0.6391918158   | C,0,-1.8761945957,-2.4166679621,0.3358461941  |
| C,0,3.3629894714,1.235015685,-1.4157847008    | C,0,-1.3304741561,-1.149538902,0.5600464315   |
| C,0,2.3591145747,1.1987610788,-2.4379768936   | C,0,-0.5860141832,-0.9769026632,1.7413192578  |
| C,0,1.5537527679,0.0653238822,-2.616544327    | H,0,0.2914786047,-1.8537196944,3.4900502573   |
| C,0,1.6735074489,-1.0684755559,-1.767247745   | H,0,-0.618718979,-4.117504713,2.9964909408    |
| H,0,2.75942525,-1.8358945474,-0.0649369551    | H,0,-2.0226799408,-4.4531401629,0.9811098582  |
| H,0,4.316348787,0.0742398352,0.1434103244     | H,0,-2.5030723822,-2.5698641515,-0.5335170391 |
| H,0,2.1933970338,2.0748145108,-3.0504706149   | C,0,-0.223683598,0.4881554914,2.0933052909    |
| H,0,0.7654408833,0.0861911991,-3.3581825337   | O,0,-0.8617127236,1.2123185841,2.8242299407   |
| C,0,0.8021024199,-2.2761441358,-1.9460768887  | N,0,0.8924475998,0.5295808601,1.401026968     |
| H,0,0.7128327682,-2.8362220637,-1.0164844901  | O,0,1.3056929152,2.4397919169,0.7531567998    |
| H,0,-0.2017058222,-1.9859594205,-2.2551123105 | C,0,0.4612476573,3.5301950761,0.4771800693    |
| H,0,1.2183350127,-2.9399664402,-2.7093276957  | H,0,0.9550425796,4.1035517845,-0.329388119    |
| C,0,4.1743729979,2.5014861429,-1.2381853637   | H,0,0.4290287325,4.1626174817,1.3718882653    |
| H,0,3.5162208293,3.3270481389,-1.5268163313   | C,0,-0.9720862021,3.2407346863,0.0319852071   |
| C,0,4.6170647293,2.7521214444,0.2044435816    | H,0,-1.4319863422,4.2015985174,-0.2202339775  |
| H,0,5.0853481941,3.7351678325,0.2798756397    | H,0,-1.5304600995,2.8216468458,0.8718177131   |
| H,0,3.7626261049,2.7192454828,0.8801705134    | C,0,-1.0888783984,2.2894005731,-1.1785426417  |
| H,0,5.3571865371,2.0178603964,0.531045991     | H,0,-2.120830436,2.3211624004,-1.5344532699   |
| C,0,5.3692670263,2.4877319557,-2.2047953195   | H,0,-0.4531026515,2.6507146332,-1.993118097   |
| H,0,5.0489402142,2.3488978259,-3.2392421546   | C,0,-0.695813224,0.9098715917,-0.723670786    |
| H,0,5.9195269073,3.4284407293,-2.141846025    | C,0,-1.621872006,0.0072830428,-0.3288019962   |

---

|                                               |                                              |
|-----------------------------------------------|----------------------------------------------|
| C,0,-3.0771886738,0.1629205083,-0.6394623952  | C,0,1.945627476,3.0914192837,0.1279527393    |
| C,0,-3.5473152431,0.1244252452,-1.9542135002  | H,0,1.4123725909,3.037987062,-0.8244798102   |
| C,0,-4.0036880447,0.3374243859,0.3937613313   | C,0,0.9056190532,3.2767810686,1.232341574    |
| C,0,-4.9021011756,0.2683229162,-2.2335747677  | H,0,0.2628436129,4.1222730395,0.9836414626   |
| H,0,-2.8373130319,-0.0175200379,-2.7600731873 | H,0,0.2827820868,2.3911150076,1.3526101259   |
| C,0,-5.3565055642,0.4853376454,0.1170849009   | H,0,1.378243124,3.4987377275,2.192739664     |
| H,0,-3.6506055284,0.3713667986,1.4173811      | C,0,2.9151064778,4.2828911315,0.0527271658   |
| C,0,-5.8116270491,0.4502893605,-1.1980351916  | H,0,3.6237556748,4.1768833158,-0.7711100578  |
| H,0,-5.2471556275,0.2349645457,-3.259849324   | H,0,2.3565696569,5.2083342789,-0.0968264985  |
| H,0,-6.0577174828,0.6316132721,0.929488424    | H,0,3.4842192646,4.3776294502,0.9806700804   |
| H,0,-6.8669411699,0.5625259848,-1.4127837864  | Ru,0,2.0494778684,-0.2960133311,0.1645266407 |
|                                               | C,0,-0.900492226,2.780756966,-2.4206052731   |
| <b>'TS15</b>                                  | C,0,-1.9512614919,3.6609230077,-2.2122865929 |
| C,0,3.8490257731,0.0141351806,1.5407758217    | C,0,-2.9805607474,3.3218100414,-1.335326973  |
| C,0,3.0162486318,1.1705420578,1.4773528736    | C,0,-2.9587598748,2.1008701808,-0.670570005  |
| C,0,2.747491913,1.8135935132,0.239432033      | C,0,-0.8745773045,1.5556100641,-1.7490314585 |
| C,0,3.2762848134,1.2133666504,-0.9410590318   | H,0,-0.0984532284,3.0155655767,-3.1079475434 |
| C,0,3.9543592177,-0.0119807256,-0.8800702203  | H,0,-1.9735923895,4.6087993664,-2.7354429794 |
| C,0,4.2891976244,-0.6239566838,0.3791728103   | H,0,-3.8022282261,4.0093023421,-1.1764294961 |
| H,0,4.0057933944,-0.4637756368,2.4988635492   | H,0,-3.7598407692,1.8268585872,0.0030770437  |
| H,0,2.5847265184,1.5581348501,2.3877349971    | C,0,0.3080704628,0.6616248853,-1.9867681566  |
| H,0,3.0151921736,1.6203872386,-1.9082182302   | O,0,0.9915259814,0.7092063056,-3.0052165714  |
| H,0,4.2063627755,-0.5225151972,-1.8000048976  | N,0,0.4999697788,-0.17961351,-0.9408673865   |
| C,0,5.0294600066,-1.9274251015,0.4020631162   | O,0,1.6028369033,-1.9411856846,-1.1024364831 |
| H,0,4.9891322412,-2.3895018631,1.3874203556   | C,0,0.5664712426,-2.8384104391,-0.8043294718 |
| H,0,4.5957157254,-2.6178638502,-0.3228008194  | H,0,-0.0646434448,-2.4647037605,0.0042629354 |
| H,0,6.0780218284,-1.7739347054,0.1339089275   | H,0,1.0232697067,-3.7670707125,-0.4274844074 |

---

|                                               |                                               |
|-----------------------------------------------|-----------------------------------------------|
| C,0,-0.2940133983,-3.1124137633,-2.0312710495 | H,0,-1.8833616042,0.2687951219,-0.3601877169  |
| H,0,0.2676089842,-3.6963979781,-2.7642986936  |                                               |
| H,0,-0.538811514,-2.1571811252,-2.4970046699  | <b><sup>1</sup>TS16</b>                       |
| C,0,-1.5924844105,-3.8579022611,-1.6693620925 | C,0,-3.6055163311,-1.4004080682,-1.5921751346 |
| H,0,-2.1032969472,-4.1658320309,-2.586239536  | C,0,-2.9653004823,-0.1865771178,-2.0159183085 |
| H,0,-1.3508883405,-4.7820286065,-1.1310130209 | C,0,-2.9044137161,0.9477704608,-1.1904823318  |
| C,0,-2.5116292195,-3.0572128028,-0.8653636545 | C,0,-3.2481868834,0.7490198619,0.1784694904   |
| C,0,-3.2625544124,-2.3683478978,-0.2209830138 | C,0,-3.7486677303,-0.4882234475,0.6358443215  |
| C,0,-4.183476704,-1.5612944275,0.5116595329   | C,0,-4.0408614076,-1.5515605387,-0.2857574534 |
| C,0,-3.7399228945,-0.6693062027,1.4988413832  | H,0,-3.7030802601,-2.2168057972,-2.2944893113 |
| C,0,-5.5585596381,-1.6396290406,0.2415267381  | H,0,-2.5964458933,-0.1314818358,-3.0296706588 |
| C,0,-4.6493417832,0.1177435376,2.1918149439   | H,0,-3.0906212896,1.5450112063,0.8937667547   |
| H,0,-2.6846953266,-0.5716910186,1.709841055   | H,0,-3.9647852362,-0.6148696716,1.6873908679  |
| C,0,-6.4602662646,-0.8492613048,0.9389569922  | C,0,-4.5770368704,-2.8458975909,0.2298509706  |
| H,0,-5.9071033414,-2.3238522134,-0.5209011993 | H,0,-4.8940542625,-3.5030084101,-0.5786150446 |
| C,0,-6.0104732189,0.0328710704,1.917383058    | H,0,-3.7724616908,-3.3360722214,0.7876311455  |
| H,0,-4.2855183758,0.8054796668,2.9449648778   | H,0,-5.4154722833,-2.6810111878,0.9081612258  |
| H,0,-7.517803628,-0.9206975802,0.7171440803   | C,0,-2.3841293004,2.2908955187,-1.6451979014  |
| H,0,-6.7160315977,0.6494346549,2.4600173175   | H,0,-1.713635233,2.6474648311,-0.8591573788   |
| C,0,0.0114942328,-0.843933192,2.2455331387    | C,0,-1.5792429459,2.2406638002,-2.9420561302  |
| C,0,-0.6218122381,-1.8616984834,3.1782519492  | H,0,-1.1379694789,3.2187083257,-3.1341029612  |
| H,0,0.1354105239,-2.4660831857,3.6752607754   | H,0,-0.7649003863,1.5186205499,-2.8797878836  |
| H,0,-1.2551003932,-1.359865544,3.9065079434   | H,0,-2.2102006781,1.9893246575,-3.7984740038  |
| H,0,-1.2432429261,-2.5310589174,2.5780374098  | C,0,-3.5565144602,3.2805336387,-1.750651631   |
| O,0,1.0701952728,-1.3064347415,1.6453721122   | H,0,-4.1056494067,3.3550242448,-0.8105364767  |
| O,0,-0.4795973585,0.2652239332,2.0794883775   | H,0,-3.1833212447,4.2743204959,-2.0026900648  |
| C,0,-1.9063288549,1.2177741147,-0.8718060703  | H,0,-4.2578841114,2.9723540115,-2.5298060864  |



---

|                                                |                                               |
|------------------------------------------------|-----------------------------------------------|
| Ru,0,-1.7375198497,-0.7945757874,-0.1933675319 | C,0,5.6265370514,-1.4134488272,-0.2393151955  |
| C,0,0.65154114,3.5695815711,1.5978768297       | C,0,5.0752381125,1.2891718483,-0.5974749909   |
| C,0,1.3437186364,4.5145027534,0.84693685       | H,0,3.1231959511,0.8402457899,0.1702494322    |
| C,0,1.7130683242,4.2311795778,-0.4689905605    | C,0,6.599405819,-0.5665609482,-0.7525075784   |
| C,0,1.3928447483,3.0047012866,-1.062270523     | H,0,5.8363196407,-2.4656953799,-0.0970834585  |
| C,0,0.3741772899,2.3455091297,1.0021600027     | C,0,6.3289363703,0.7864649801,-0.9342258369   |
| H,0,0.3245436187,3.7733750268,2.6104836276     | H,0,4.8518727862,2.339782281,-0.736081316     |
| H,0,1.5938060257,5.4755425941,1.2786467267     | H,0,7.5730379012,-0.9641665532,-1.0112238104  |
| H,0,2.2637627189,4.9719771969,-1.0387422842    | H,0,7.0903320154,1.443898305,-1.3349409126    |
| H,0,1.6903173449,2.8071244919,-2.0860808225    | C,0,0.8147089097,-1.2688262803,-1.8685755306  |
| C,0,-0.4133628233,1.218351153,1.5212291217     | C,0,1.7229928233,-2.201918121,-2.615409708    |
| O,0,-0.9999452262,1.0852472248,2.5881148178    | H,0,1.2251882388,-3.1474479925,-2.8137210669  |
| N,0,-0.3677907831,0.2246664405,0.5672648177    | H,0,2.0632875931,-1.7351257842,-3.5388671806  |
| O,0,-1.5390590366,-2.4364404503,0.9004039055   | H,0,2.5965657833,-2.3782360707,-1.9848674815  |
| C,0,-1.1312161037,-2.4553318615,2.2444549051   | O,0,-0.1978811482,-1.7363514712,-1.3142708842 |
| H,0,-1.39698339,-3.4527741536,2.6258357907     | O,0,1.1784973251,-0.0334511605,-1.8809502351  |
| H,0,-1.6748979539,-1.7157706166,2.8485608421   | C,0,0.7458084791,2.0423845977,-0.2989011472   |
| C,0,0.3687667061,-2.2170336605,2.4227244662    | H,0,0.7993336467,0.6489073318,-1.1052051902   |
| H,0,0.6390253391,-2.3818654077,3.4692100331    |                                               |
| H,0,0.5847867171,-1.1752089169,2.2030258949    | <b><sup>1</sup>TS17</b>                       |
| C,0,1.2191373622,-3.109277324,1.4894353031     | C,0,-1.93585448,-1.8348833389,-1.0358222702   |
| H,0,1.4787595072,-4.0523970967,1.9792179434    | C,0,-2.7268926348,-0.7005657324,-0.9077663193 |
| H,0,0.6094751486,-3.3582196341,0.6157138638    | C,0,-3.6115069397,-0.544495936,0.1640747174   |
| C,0,2.4169874943,-2.4275348221,1.0235692225    | C,0,-3.6559599444,-1.5660302051,1.1086160618  |
| C,0,3.3374122473,-1.7650351176,0.6142727079    | C,0,-2.854061902,-2.6995484431,0.9858707878   |
| C,0,4.3607383319,-0.9160964068,0.1024956874    | C,0,-1.9860111243,-2.8607474078,-0.0877536848 |
| C,0,4.0986169897,0.4502122482,-0.0834104619    | H,0,-1.27608525,-1.9222082288,-1.8882703178   |

---

|                                               |                                              |
|-----------------------------------------------|----------------------------------------------|
| H,0,-2.6383528128,0.0804821153,-1.6521695478  | H,0,1.5514991878,-2.0378206134,1.7040984614  |
| H,0,-4.3132185753,-1.4841945861,1.9644002462  | C,0,0.9974166963,-0.5676554831,-2.6214547698 |
| H,0,-2.9093529875,-3.4716241903,1.7458380564  | O,0,1.0181274008,-0.7656938616,-3.8396905859 |
| C,0,-1.1430270278,-4.0958973168,-0.2457593711 | N,0,0.3032273237,0.4716753506,-2.0877618898  |
| H,0,-0.2031785616,-3.8712794683,-0.7486710131 | O,0,-1.3149478503,1.9274839504,0.156063251   |
| H,0,-0.9104676827,-4.5457779979,0.7206448176  | C,0,-1.2612744547,3.2791447388,-0.3104138365 |
| H,0,-1.6658461336,-4.8486667006,-0.8433578461 | H,0,-0.7959654784,3.9127070758,0.4544398903  |
| C,0,-4.4940948037,0.6895878553,0.2218826266   | H,0,-2.288816386,3.6237018486,-0.4589818756  |
| H,0,-3.8687067697,1.5267936778,-0.1045541397  | C,0,-0.4983277008,3.3660178072,-1.6210830146 |
| C,0,-5.6546121861,0.558792632,-0.7789988126   | H,0,-0.6246470041,4.369999637,-2.0322082536  |
| H,0,-6.2555040663,1.4713764911,-0.7971396001  | H,0,-0.9131424593,2.64931993,-2.3277835569   |
| H,0,-5.2885550181,0.3693944716,-1.7891680599  | C,0,1.0053340984,3.0890574347,-1.4624788736  |
| H,0,-6.3071390592,-0.2720491824,-0.4990268775 | H,0,1.4790640232,3.0617955207,-2.4478575795  |
| C,0,-5.0226898669,1.0245102347,1.6178312409   | H,0,1.4954530949,3.8860913212,-0.8899879901  |
| H,0,-4.2104577514,1.1201552956,2.3384286427   | C,0,1.29854897,1.8172017514,-0.7902228118    |
| H,0,-5.5690315778,1.9698144131,1.5922156725   | C,0,2.0298877361,1.2039146239,0.1741787712   |
| H,0,-5.7187192096,0.2613043306,1.9750993444   | C,0,3.3492442862,1.0805826851,0.6981193137   |
| Ru,0,0.315217618,0.411488426,-0.0133730475    | C,0,4.4244187498,1.7071756844,0.0419370402   |
| C,0,2.2807782539,-2.687262279,-2.0540052643   | C,0,3.5896174739,0.3539918391,1.8754970745   |
| C,0,2.7255946386,-3.5838628889,-1.0882927016  | C,0,5.7083398218,1.591563078,0.5459073099    |
| C,0,2.4679060279,-3.3463608169,0.2625400413   | H,0,4.2388865566,2.2628325423,-0.8682878662  |
| C,0,1.7878041496,-2.1998522505,0.6607732198   | C,0,4.8742283047,0.2541504925,2.3798192006   |
| C,0,1.367411998,-1.2886360836,-0.3048370288   | H,0,2.7548496729,-0.1116965404,2.3788515741  |
| C,0,1.6062219966,-1.5387254109,-1.6564963047  | C,0,5.934434366,0.8675951195,1.7150114415    |
| H,0,2.4310034278,-2.8621033017,-3.1120768752  | H,0,6.5354829415,2.0633159568,0.0316095855   |
| H,0,3.2586913167,-4.4789678383,-1.3841605259  | H,0,5.0559155424,-0.3036125779,3.2892173764  |
| H,0,2.7906166657,-4.0649918774,1.0064610862   | H,0,6.9390569345,0.7830153606,2.1094517407   |

---

|                                              |                                               |
|----------------------------------------------|-----------------------------------------------|
| C,0,-1.4559275148,-0.6451466618,3.8651089536 | C,0,-1.1713469097,2.8707470712,-0.0164252936  |
| H,0,-1.8581915732,-1.6012444271,3.5318890437 | H,0,-0.8483282774,3.8060424436,-0.4812912617  |
| H,0,-0.5098347288,-0.8422256011,4.371770869  | H,0,-2.1261886928,3.0811744944,0.4740981912   |
| H,0,-2.148629717,-0.1595118472,4.5475541802  | C,0,-1.4072562263,1.8411969954,-1.145039827   |
| C,0,-1.2082268844,0.2245745188,2.6570404567  | H,0,-1.8826007455,2.3504380741,-1.9886837025  |
| O,0,-1.7305261274,1.3478209217,2.5729631647  | H,0,-0.4446875418,1.4593856899,-1.494263882   |
| O,0,-0.4280683786,-0.2989764686,1.7770931889 | C,0,-2.2446329491,0.7196244012,-0.7427207029  |
| H,0,-1.5661935171,1.8621273185,1.1377287313  | C,0,-2.9193995563,-0.2010568227,-0.3580263655 |
|                                              | C,0,-3.6302328543,-1.3237046628,0.1547869517  |
| <b>Four Carbon</b>                           | C,0,-2.9820791125,-2.2197293519,1.0198560461  |
| <b>1a</b>                                    | C,0,-4.9715592935,-1.5590798863,-0.1784257886 |
| C,0,4.2129898277,-0.7825947995,-1.1683595739 | C,0,-3.6602344208,-3.3152759976,1.5339995145  |
| C,0,5.5215177898,-1.2435554229,-1.1700927274 | H,0,-1.9455817875,-2.0384344409,1.2739701618  |
| C,0,6.2290228226,-1.3413885599,0.0245455986  | C,0,-5.6425849018,-2.6583810932,0.3387970621  |
| C,0,5.6238432955,-0.9728072304,1.220763101   | H,0,-5.4769226469,-0.8728081328,-0.8452304268 |
| C,0,4.3099392964,-0.5200074782,1.2265510108  | C,0,-4.9918348881,-3.5399431401,1.1964091987  |
| C,0,3.5930143116,-0.4291975144,0.0310093136  | H,0,-3.1478905261,-3.9988370189,2.1998243961  |
| H,0,3.6528193202,-0.6857443682,-2.0885502758 | H,0,-6.6782273831,-2.8280141861,0.0715558514  |
| H,0,5.9925131152,-1.5232803514,-2.1038057853 | H,0,-5.5183161259,-4.3964373019,1.5981614538  |
| H,0,7.2521490262,-1.695528115,0.0219105649   | C,0,-0.1250121273,2.4932639262,1.0394915911   |
| H,0,6.1774677751,-1.0284545832,2.1493916354  | H,0,-0.0905888399,3.2982250201,1.780951089    |
| H,0,3.8603037602,-0.2033080137,2.158898214   | H,0,0.8656237148,2.4529038033,0.5817302559    |
| C,0,2.176691105,0.0601229556,-0.0450974909   | C,0,-0.3584772328,1.1878513341,1.7913037585   |
| O,0,1.7262911991,0.6056170561,-1.0318819089  | H,0,-1.4201002681,1.0061964885,1.9601233142   |
| N,0,1.4546731764,-0.1286024071,1.1159261257  | H,0,0.1562242999,1.1987950618,2.7562258529    |
| H,0,1.7105582895,-0.9108598423,1.7028119555  |                                               |
| O,0,0.0727363028,0.016121906,1.0628310841    | <b><sup>1</sup>TS2</b>                        |

---

|                                               |                                              |
|-----------------------------------------------|----------------------------------------------|
| C,0,-0.8522447341,-2.1717763286,-1.4704576887 | C,0,1.5158823359,1.5583245765,-2.9818218612  |
| C,0,-1.9015195001,-1.2596471441,-1.763382855  | C,0,1.2206541003,0.5282254787,-2.1037724893  |
| C,0,-2.8099242213,-0.882157755,-0.7652607257  | C,0,0.5861161106,0.7861043629,-0.8782684957  |
| C,0,-2.7185513714,-1.5552569284,0.5012793751  | C,0,0.2447329717,2.1175283625,-0.5742545385  |
| C,0,-1.7386080697,-2.5254589556,0.754657187   | H,0,0.3166047715,4.1613628332,-1.1473208319  |
| C,0,-0.7504653188,-2.8337610002,-0.2238669249 | H,0,1.477275395,3.6850422743,-3.3175741946   |
| H,0,-0.0997016561,-2.3621868095,-2.2245160528 | H,0,1.999731529,1.3362122089,-3.9252807434   |
| H,0,-1.9019643799,-0.7550418909,-2.7178346503 | H,0,1.5219625358,-0.4830733023,-2.3467080317 |
| H,0,-3.402656072,-1.2690759888,1.2882850986   | C,0,-0.611684327,2.3898796601,0.6223022249   |
| H,0,-1.6860956745,-2.9898429448,1.731486446   | O,0,-0.7466783037,3.5000028529,1.1297870378  |
| C,0,0.3386469429,-3.8260685581,0.0576221362   | N,0,-1.2262634483,1.235789606,0.9638996135   |
| H,0,1.1969021373,-3.6587353906,-0.5929162423  | O,0,-2.2599255921,1.3756076199,1.9091264039  |
| H,0,0.6765932279,-3.7468113467,1.0919997725   | C,0,0.4904671648,0.9493832097,3.6433513243   |
| H,0,-0.0141839388,-4.8483589683,-0.1034146374 | H,0,1.1087507472,1.1017761118,4.5321183142   |
| C,0,-3.8624837232,0.1896605935,-0.9472685589  | H,0,0.7824493744,1.718907007,2.9298944115    |
| H,0,-3.9482321251,0.6860302719,0.0233726081   | C,0,0.8396918757,-0.4392904673,3.0439680352  |
| C,0,-3.4743312827,1.256387705,-1.9713655286   | H,0,1.8817848169,-0.6753624814,3.2848668509  |
| H,0,-4.2041889671,2.0667809256,-1.9538566845  | H,0,0.2218918648,-1.217921379,3.4986328367   |
| H,0,-2.4948468358,1.6779618315,-1.7456138747  | C,0,0.7003166162,-0.4230093136,1.5686721108  |
| H,0,-3.4575676485,0.8560976935,-2.9882671189  | C,0,1.4393247755,-0.1235342151,0.55735108    |
| C,0,-5.2151929747,-0.4538772209,-1.2875454955 | C,0,2.8644677931,-0.2451973037,0.2435506436  |
| H,0,-5.5110119056,-1.1887468923,-0.5359707084 | C,0,3.5118943458,-1.465999862,0.460332227    |
| H,0,-5.9953806249,0.3076550645,-1.3405775311  | C,0,3.6177411601,0.8518168151,-0.1894510866  |
| H,0,-5.1703405376,-0.960828536,-2.2547463653  | C,0,4.8806287213,-1.5892079503,0.2503080042  |
| Ru,0,-0.7464433977,-0.6003049066,0.1144814974 | H,0,2.9300102839,-2.315336466,0.7934129128   |
| C,0,0.5883557994,3.1532294552,-1.4349981236   | C,0,4.9847384725,0.7291543,-0.3877528478     |
| C,0,1.2217577594,2.8794471871,-2.6409282374   | H,0,3.1231561251,1.7979636063,-0.3620307948  |

---

|                                              |                                               |
|----------------------------------------------|-----------------------------------------------|
| C,0,5.620351757,-0.4916446347,-0.1736580698  | H,0,3.3878058358,2.0340000549,1.2580244006    |
| H,0,5.3676237855,-2.5417313071,0.4185506091  | C,0,4.2168767077,0.3388737073,2.2408629507    |
| H,0,5.5580066027,1.5890453864,-0.7105812517  | H,0,4.4760414329,0.9253284713,3.1233976909    |
| H,0,6.686764302,-0.5846781776,-0.3362540396  | H,0,3.2681036212,-0.1617715304,2.4325976241   |
| C,0,-0.9742092662,1.1488788759,4.0554725108  | H,0,4.9941248174,-0.4193089543,2.116466122    |
| H,0,-1.1426899989,0.621652771,5.0027503015   | C,0,5.4682684444,1.9308981298,0.7225689903    |
| H,0,-1.1476460586,2.2100266163,4.2471012091  | H,0,5.3942251541,2.6238778948,-0.1177602584   |
| C,0,-2.0563825196,0.641874404,3.1110128394   | H,0,5.8141465142,2.4919602725,1.5926211327    |
| H,0,-1.8869394938,-0.415067509,2.8761758094  | H,0,6.2283256276,1.1849238743,0.477356554     |
| H,0,-3.025094023,0.7176685575,3.6102869193   | Ru,0,1.5236572648,-0.2344671779,-0.5086019062 |
|                                              | C,0,-0.2294374282,-2.1417277573,2.8788024707  |
| <b>'TS5</b>                                  | C,0,-0.0452866145,-3.5071806837,2.7227472048  |
| C,0,3.1563869269,-1.4246917349,-1.6242496726 | C,0,0.6018578014,-3.9887695415,1.5822165457   |
| C,0,3.6351442521,-0.82983103,-0.4132209838   | C,0,1.0802707161,-3.1205520382,0.6041808015   |
| C,0,3.6004468939,0.5696802381,-0.2207392168  | C,0,0.2522708212,-1.2859643983,1.8922337946   |
| C,0,3.0147123475,1.3585376247,-1.2553482688  | H,0,-0.7596511337,-1.7291122856,3.7280542679  |
| C,0,2.4428446714,0.7671155387,-2.3822062982  | H,0,-0.4160313504,-4.1982813423,3.4689725879  |
| C,0,2.5250989994,-0.6516702321,-2.5954937849 | H,0,0.7272025652,-5.057779777,1.4525970465    |
| H,0,3.2127053872,-2.4977192281,-1.7469231904 | H,0,1.5579515254,-3.5337161185,-0.2758837354  |
| H,0,4.0444974047,-1.4716557121,0.3523316747  | C,0,-0.0217066578,0.1796740888,1.8963954499   |
| H,0,2.9109589126,2.4252973522,-1.1059996307  | O,0,-0.8846860892,0.7298822543,2.5586607358   |
| H,0,1.9102908616,1.3787773065,-3.0976432605  | N,0,0.9080162206,0.7436052426,1.0453934528    |
| C,0,1.8771849933,-1.2571226768,-3.8034518817 | O,0,0.2500907202,2.4846956288,0.5138785493    |
| H,0,1.9842772734,-2.3406959462,-3.8130953275 | C,0,-0.4115240146,3.4271435858,1.3836014912   |
| H,0,0.8114219324,-1.0207073225,-3.8074109855 | H,0,-0.0540830902,4.4181392314,1.0769719965   |
| H,0,2.3170527362,-0.8539520362,-4.7184795648 | H,0,-0.0303537608,3.2190265306,2.3811394125   |
| C,0,4.1209363354,1.2565489316,1.022910351    | C,0,-1.92875366,3.3620934741,1.3774618535     |

---

|                                               |                                               |
|-----------------------------------------------|-----------------------------------------------|
| H,0,-2.2805757834,3.9169802304,2.2546435018   | C,0,-4.1136175811,3.6025951067,0.0926368153   |
| H,0,-2.2185578723,2.3257676918,1.5377078116   | H,0,-4.6014828475,4.0367933867,0.9729487039   |
| C,0,-4.3540811505,2.1648174603,0.0603622673   | H,0,-4.5726960928,4.0756060938,-0.7803717732  |
| C,0,-4.4135273219,0.9615949685,0.0519578355   |                                               |
| C,0,-4.3505329839,-0.4616454308,0.0163517133  | <b><sup>1</sup>TSSb</b>                       |
| C,0,-3.3019268565,-1.1199337161,0.6762704272  | C,0,-0.5905260106,-0.4796909391,-2.6692679656 |
| C,0,-5.2675835059,-1.2175972686,-0.7265240385 | C,0,0.2262354255,-1.4557497247,-2.0547609886  |
| C,0,-3.1591914078,-2.4950652231,0.5676698065  | C,0,1.5299280652,-1.1525425763,-1.6134459269  |
| H,0,-2.5980856718,-0.5414952406,1.2581493915  | C,0,1.9801943193,0.18279516,-1.7682290835     |
| C,0,-5.1247030457,-2.5947165763,-0.8211874454 | C,0,1.157515765,1.145058951,-2.3479487084     |
| H,0,-6.0776644688,-0.7136656046,-1.2374682254 | C,0,-0.1327622581,0.8340422681,-2.8338643615  |
| C,0,-4.0668355365,-3.2364424489,-0.1826846619 | H,0,-1.5738201728,-0.7582182615,-3.0243207694 |
| H,0,-2.3271229235,-2.9815154621,1.0594459452  | H,0,-0.1655445411,-2.455271,-1.9371590202     |
| H,0,-5.8362468789,-3.1685210341,-1.4021137158 | H,0,2.967997397,0.4732107425,-1.3854817277    |
| H,0,-3.9507025154,-4.3095390144,-0.2702027759 | H,0,1.5251729006,2.1602592187,-2.4353929666   |
| C,0,-1.1088171704,0.4194942104,-1.7779547762  | C,0,-0.9873620431,1.8987731294,-3.4547381617  |
| C,0,-2.2790903443,-0.0318959168,-2.6218868567 | H,0,-1.7925181983,1.4704403648,-4.0508603989  |
| H,0,-2.5795814708,-1.0433393504,-2.3606527656 | H,0,-1.4354799604,2.5233966364,-2.6775562662  |
| H,0,-3.1103329916,0.657551639,-2.496976588    | H,0,-0.3903739735,2.5471163905,-4.096791049   |
| H,0,-1.9698541702,-0.014954847,-3.6705507509  | C,0,2.4428961089,-2.1547486228,-0.9507921601  |
| O,0,-0.3627316259,-0.5238934411,-1.3422275766 | H,0,2.8352557748,-1.6506603989,-0.0610094899  |
| O,0,-0.9205569169,1.6386118845,-1.597343709   | C,0,1.7465723734,-3.4421124138,-0.5159526566  |
| C,0,0.9277215665,-1.7401896399,0.7516792929   | H,0,2.4469242968,-4.0571313866,0.0493557087   |
| H,0,-0.2748415156,2.1906947573,-0.3068584989  | H,0,0.8884512844,-3.2428582566,0.1287642673   |
| C,0,-2.6026961473,3.9189454625,0.1232488901   | H,0,1.4068925098,-4.0360875353,-1.3698246639  |
| H,0,-2.1493764513,3.4937866876,-0.7728129183  | C,0,3.6462821248,-2.442511019,-1.8659358485   |
| H,0,-2.4714112367,5.0046777263,0.0747154883   | H,0,4.1818494907,-1.5263915844,-2.11527926    |

---

|                                               |                                              |
|-----------------------------------------------|----------------------------------------------|
| H,0,4.3429521683,-3.1039936085,-1.3494590819  | C,0,-4.2114842329,0.7602005913,0.9523279755  |
| H,0,3.3313794631,-2.9322788943,-2.7917890998  | C,0,-5.3989930285,0.5130074172,-1.5524958808 |
| Ru,0,-0.2108723035,0.1278811545,-0.3035967934 | H,0,-3.4584971592,0.9607425195,-2.3490570608 |
| C,0,-1.6229733471,-2.5744640941,2.6584288296  | C,0,-5.5591862767,0.4485183963,0.8491003457  |
| C,0,-2.6899679342,-3.2702131096,2.1062347017  | H,0,-3.7371461446,0.8367506449,1.9213159134  |
| C,0,-3.105422393,-2.9813143545,0.8067377095   | C,0,-6.1566875771,0.3230322382,-0.4009368197 |
| C,0,-2.4789797504,-1.9898058335,0.0525921569  | H,0,-5.8603467026,0.4202654945,-2.527465247  |
| C,0,-1.4069687722,-1.2940547628,0.599056414   | H,0,-6.1427538711,0.2956989457,1.7477319952  |
| C,0,-0.9894767027,-1.6055499365,1.8885577387  | H,0,-7.2079123045,0.0770267636,-0.4779747162 |
| H,0,-1.2676047684,-2.7708283958,3.6624274687  | C,0,6.4709706435,-0.4046591501,0.1264603771  |
| H,0,-3.1957568303,-4.0376214772,2.6778612691  | H,0,7.0595041725,0.050510102,-0.6681686432   |
| H,0,-3.9352307322,-3.5279368793,0.3749663309  | H,0,6.9237544468,-0.1937975298,1.0966131937  |
| H,0,-2.8517572949,-1.7646135343,-0.9379845977 | H,0,6.4678328295,-1.4903728071,0.0050712708  |
| C,0,0.1728116809,-0.7922640811,2.3265515254   | C,0,5.0300988387,0.1034462216,0.113222623    |
| O,0,0.5464470924,-0.6070248442,3.458192403    | O,0,4.6817109397,0.8861051449,-0.8012838739  |
| N,0,0.7795438651,-0.2686253675,1.1573543838   | O,0,4.2816956955,-0.3377141625,1.0351218493  |
| O,0,2.4601506585,1.2384292447,2.0289572302    | H,0,3.1175521226,0.5753104934,1.6408608678   |
| C,0,2.5204569052,2.4082111525,1.2564629633    | C,0,-0.4754867383,3.2552320546,0.6791102087  |
| H,0,2.1126331006,2.230822789,0.2464306483     | H,0,0.2232476222,3.6065222771,-0.0843337003  |
| H,0,3.5614502698,2.7099134403,1.0958615471    | H,0,-1.2958815115,3.9794819741,0.7053471603  |
| C,0,1.7374176722,3.5032656155,1.9623026908    | C,0,0.2413549018,3.1971928478,2.0567429333   |
| H,0,1.8899892497,4.456565959,1.4438834193     | H,0,-0.2403144626,3.9148852413,2.7228902062  |
| H,0,2.1448838705,3.6135330882,2.9699251342    | H,0,0.1136147691,2.2138608324,2.509888882    |
| C,0,-1.0634828685,1.9803852132,0.2310357465   |                                              |
| C,0,-2.0394028728,1.2540518399,-0.0810121407  | <b><sup>1</sup>TS10</b>                      |
| C,0,-3.4432391612,0.9516814597,-0.2018066794  | C,0,-0.4613713196,-2.4358829038,0.0446172663 |
| C,0,-4.0493179155,0.8192405233,-1.4549742805  | C,0,0.8735772572,-2.1664906933,0.4031882843  |

---

|                                               |                                              |
|-----------------------------------------------|----------------------------------------------|
| C,0,1.8088970464,-1.768681996,-0.5586221553   | C,0,-0.1443089688,0.5419209009,1.890587892   |
| C,0,1.3801056726,-1.7133018039,-1.9038504585  | C,0,0.7021004996,1.612887014,2.2028382753    |
| C,0,0.0770908077,-2.0107541397,-2.2586680248  | H,0,1.5135887499,2.926697147,3.6832167886    |
| C,0,-0.8809367808,-2.3587206254,-1.2908814478 | H,0,0.2515042194,1.8179956821,5.5456863157   |
| H,0,-1.1530133773,-2.7569257899,0.8122155203  | H,0,-1.2406898205,-0.0855656298,5.0344513459 |
| H,0,1.1575894708,-2.2558484436,1.4413720445   | H,0,-1.5377483084,-0.8736338755,2.7332330123 |
| H,0,2.0693769486,-1.3679432811,-2.6596231031  | C,0,1.4160919463,2.1845996402,1.0208224749   |
| H,0,-0.2232727732,-1.9296047095,-3.2955019568 | O,0,2.0007975428,3.245669832,0.9598673451    |
| C,0,-2.3044786826,-2.6237929596,-1.6924635565 | N,0,1.3191918584,1.2184337431,0.0162673986   |
| H,0,-2.8203889169,-3.2481611191,-0.9633492454 | C,0,0.8640942871,3.5546201404,-2.3461765755  |
| H,0,-2.8586712847,-1.685689177,-1.7783226358  | H,0,0.8569451792,4.3232006644,-3.1261739203  |
| H,0,-2.3476482614,-3.1226355455,-2.6612363585 | H,0,1.7037648818,3.7728977378,-1.6835319839  |
| C,0,3.229683198,-1.3639152633,-0.2280083841   | C,0,-0.4419450272,3.6478151299,-1.5208373508 |
| H,0,3.3568113248,-0.3858829804,-0.7047686437  | H,0,-0.9057798884,4.6155693124,-1.7236395249 |
| C,0,3.4961906701,-1.1904257742,1.2662141116   | H,0,-0.204450641,3.657445302,-0.4586495133   |
| H,0,4.5027146997,-0.7981479463,1.4161336969   | C,0,-1.5154070639,2.5634524269,-1.7755863062 |
| H,0,2.7955169054,-0.4902062484,1.720772047    | H,0,-2.5160748973,3.0054862876,-1.7218216889 |
| H,0,3.4335243378,-2.1421119724,1.8014467116   | H,0,-1.4103284644,2.1652327265,-2.7878112366 |
| C,0,4.2350509715,-2.3457576693,-0.851632209   | C,0,-1.4958265389,1.4439526349,-0.8158626466 |
| H,0,4.0942567244,-2.4448497827,-1.9286881785  | C,0,-2.1120364082,0.6848268234,-0.0013149016 |
| H,0,5.2551504887,-1.9984072036,-0.6786770866  | C,0,-3.3124067149,0.4437098754,0.7644334923  |
| H,0,4.1351807101,-3.3387060181,-0.4058514896  | C,0,-3.7224897262,-0.8405782905,1.1374106993 |
| Ru,0,-0.1032533651,0.1049340408,-0.1114547405 | C,0,-4.1032626752,1.5361295268,1.151374579   |
| C,0,0.8521847466,2.0887589864,3.499783815     | C,0,-4.8888589644,-1.0324518281,1.8629882173 |
| C,0,0.148047383,1.4708032095,4.5255839967     | H,0,-3.1183405052,-1.6886874017,0.8533374151 |
| C,0,-0.6936141735,0.3990066146,4.2341068817   | C,0,-5.2682967045,1.3427252381,1.878790922   |
| C,0,-0.8532964704,-0.0584049435,2.9252969542  | H,0,-3.7831122247,2.5354810591,0.8876404878  |



---

|                                               |                                               |
|-----------------------------------------------|-----------------------------------------------|
| C,0,-5.6667813304,0.0584553108,2.2377929062   | H,0,-4.1907851682,-2.7304434187,-1.3009525093 |
| H,0,-5.1910825502,-2.0346785665,2.1401214084  | H,0,-2.5484707115,-2.6970940239,-0.6713285181 |
| H,0,-5.8637413908,2.1976243935,2.1736489099   | H,0,-3.8721448349,-3.3220463948,0.327974217   |
| H,0,-6.5740169603,-0.0902825885,2.8091892537  | C,0,-5.3409061662,-0.9801372625,0.5079448576  |
| C,0,1.1697901579,2.2143799764,-3.0395793515   | H,0,-5.5576494543,0.0325439875,0.8524800035   |
| H,0,0.3705176771,2.0229769472,-3.7876839948   | H,0,-5.9779396068,-1.1848551654,-0.3542497415 |
| H,0,2.0949981915,2.3657891289,-3.6261153278   | H,0,-5.6168193279,-1.6738200485,1.3061434893  |
| O,0,1.2715862251,1.1497591072,-2.1804659523   | Ru,0,-0.7821311277,-0.0235631718,1.230707532  |
|                                               | C,0,0.3794041952,-3.1406184014,-1.3044607605  |
| <b><sup>1</sup>TS18</b>                       | C,0,1.1202301609,-4.0342298035,-0.5396245431  |
| C,0,-1.3423037685,-1.1977309543,3.0799674416  | C,0,1.5875945714,-3.6569253762,0.7220864852   |
| C,0,-2.192485578,-1.6489397056,2.0224436857   | C,0,1.3172634962,-2.3901190674,1.2205634986   |
| C,0,-2.9813115643,-0.7557673776,1.2946683027  | C,0,0.5656164452,-1.4818728964,0.4627250346   |
| C,0,-2.8888162869,0.6351249733,1.6444119456   | C,0,0.0984313269,-1.8751142366,-0.807130664   |
| C,0,-2.1080892205,1.0751786714,2.716014491    | H,0,0.0037263163,-3.4018990182,-2.2860470219  |
| C,0,-1.2973716258,0.1522043652,3.4553292785   | H,0,1.3402093263,-5.0231253162,-0.9219230739  |
| H,0,-0.7159037005,-1.9147376925,3.5945645679  | H,0,2.1709944621,-4.3537623578,1.3118799392   |
| H,0,-2.1651290755,-2.6940445633,1.7497241909  | H,0,1.7031025037,-2.0879997878,2.1867601663   |
| H,0,-3.4232969921,1.3596451599,1.0446646643   | C,0,-0.6633493223,-0.8625833396,-1.6051233759 |
| H,0,-2.0632349328,2.1284097541,2.9533850486   | O,0,-0.909909756,-0.9975051897,-2.8007264514  |
| C,0,-0.4516317887,0.626090322,4.5998567911    | N,0,-0.8971525741,0.2172013749,-0.8187709258  |
| H,0,0.363671925,-0.0686681189,4.800072117     | O,0,-1.2512871226,1.389091535,-1.5018396903   |
| H,0,-0.0219430271,1.6054249212,4.3936029668   | C,0,1.902336049,0.7170618098,-1.9397184765    |
| H,0,-1.0596467451,0.7077909001,5.5051033044   | H,0,2.7959200353,0.796517253,-2.5685910205    |
| C,0,-3.8611067169,-1.1516267717,0.1278489258  | H,0,1.3379945554,-0.1065362928,-2.364860669   |
| H,0,-3.6289007426,-0.4453035133,-0.6755774044 | C,0,2.4294915251,0.3297980146,-0.5409027941   |
| C,0,-3.5950634281,-2.5587285077,-0.404074261  | H,0,2.9803782144,-0.6089783665,-0.6371629842  |

|                                              |                                               |
|----------------------------------------------|-----------------------------------------------|
| H,0,3.1416449828,1.0949929021,-0.2076252205  | C,0,0.8701344806,-1.9567855525,-2.2277936437  |
| C,0,1.4522433153,0.2473413025,0.5832061702   | C,0,-0.0534176204,-2.8509088824,-1.6889413759 |
| C,0,0.9714094236,1.0704176581,1.4423177111   | H,0,-0.6279937856,-3.941132763,0.086048092    |
| C,0,1.407948045,2.2743315728,2.1075601479    | H,0,1.1834567466,-3.0871352009,1.5051679404   |
| C,0,0.569969958,3.3903538327,2.2441388717    | H,0,2.5892132168,-0.706165365,-1.8153814717   |
| C,0,2.7075265181,2.3512571602,2.6353501209   | H,0,0.8031120515,-1.6629767554,-3.2659165409  |
| C,0,1.0214225332,4.5463321942,2.8646524729   | C,0,-1.2369603747,-3.3380137096,-2.4689574965 |
| H,0,-0.4322066175,3.3439449316,1.8411051264  | H,0,-1.2871840285,-4.4292498325,-2.4525775377 |
| C,0,3.1513521193,3.5058361767,3.263554382    | H,0,-2.1552334981,-2.956429618,-2.0168555463  |
| H,0,3.356572572,1.4886666385,2.5551037127    | H,0,-1.1965175055,-3.0053542734,-3.505398644  |
| C,0,2.312317376,4.610239753,3.3812390331     | C,0,3.1635684983,-1.2358412929,0.7797912375   |
| H,0,0.3622656026,5.4016759652,2.9475799435   | H,0,3.3894315812,-0.2367464472,0.3990402495   |
| H,0,4.1562308369,3.5437119098,3.6657956734   | C,0,2.8874762227,-1.111965044,2.2778647897    |
| H,0,2.6593446065,5.5094205062,3.8737701841   | H,0,3.7168499314,-0.6009559451,2.7690278055   |
| C,0,1.1243355363,2.03359868,-2.1380169524    | H,0,1.9766933511,-0.5460954019,2.4650081705   |
| H,0,1.7873994614,2.8743993931,-1.897459585   | H,0,2.7824463323,-2.0900364671,2.7524377256   |
| H,0,0.9195492861,2.1006482038,-3.209927545   | C,0,4.3878401154,-2.1280423453,0.5193360863   |
| C,0,-0.1858463038,2.340355549,-1.3939889176  | H,0,4.6260437604,-2.1755734756,-0.54451951    |
| H,0,0.0077639545,2.5369124712,-0.33930867    | H,0,5.261597407,-1.7412925601,1.0476097513    |
| H,0,-0.6113344088,3.2491489082,-1.8251877688 | H,0,4.2050205928,-3.1472321803,0.8690182737   |
|                                              | Ru,0,0.0120383309,-0.7208808265,-0.3790921493 |
| <sup>1</sup> O                               | C,0,-3.6222112083,2.230686518,-1.209157166    |
|                                              | C,0,-3.4434305559,3.6019445716,-1.1221134927  |
| C,0,0.105948484,-3.2679448938,-0.3304991406  | C,0,-2.3838315771,4.1081002674,-0.3739517467  |
| C,0,1.0979108672,-2.7513261286,0.4823094843  | C,0,-1.5025002091,3.239147391,0.2540105441    |
| C,0,1.985006875,-1.7513181462,-0.0233001342  | C,0,-1.6523028662,1.8520903127,0.1479891512   |
| C,0,1.8709439349,-1.3935537946,-1.3932423406 | C,0,-2.7342004653,1.3529720458,-0.587415362   |

---

|                                               |                                              |
|-----------------------------------------------|----------------------------------------------|
| H,0,-4.4699169288,1.8075378015,-1.7318047138  | C,0,2.3782515935,1.9776241828,-1.4455027379  |
| H,0,-4.132407023,4.2742847036,-1.6176684323   | C,0,2.202638961,2.6564276673,0.8616364202    |
| H,0,-2.2399767257,5.1779379913,-0.2847742911  | C,0,3.4749831281,2.810694363,-1.6057955753   |
| H,0,-0.6696720772,3.6379470987,0.8207458539   | H,0,1.9819463001,1.4217506192,-2.2840883034  |
| C,0,-3.0943909103,-0.0968639005,-0.5176028873 | C,0,3.3134841224,3.4711191466,0.7043162636   |
| O,0,-4.2763307654,-0.447732698,-0.5417442226  | H,0,1.6975553129,2.6088740089,1.8168015454   |
| N,0,-2.0511595816,-0.9147924653,-0.2622967082 | C,0,3.955471912,3.5503208968,-0.528629341    |
| O,0,-2.3909979784,-2.1004264039,0.4306766785  | H,0,3.9539105478,2.8899539078,-2.5736590717  |
| C,0,-3.1010292621,-1.8816570594,1.6710897901  | H,0,3.6744793476,4.0553462894,1.5414995897   |
| H,0,-2.8692937018,-2.7828269541,2.2455318067  | H,0,4.8156262796,4.1957348338,-0.6527477483  |
| H,0,-4.1713831107,-1.8567582632,1.457119      | C,0,-0.5841493418,0.8447954963,2.3027640623  |
| C,0,-2.7273028109,-0.6304473637,2.4668315049  | H,0,-1.1087918242,1.7029353362,2.7365398866  |
| H,0,-3.3197005237,-0.6916963621,3.3845333208  | H,0,0.4407635056,0.878460926,2.680322262     |
| H,0,-3.1025093636,0.2508104252,1.9484508924   | C,0,-1.2342725163,-0.4555601306,2.8188526177 |
| C,0,-0.5682156228,1.0005123494,0.7831074328   | H,0,-0.6645501733,-1.296911731,2.419568944   |
| C,0,0.5858455389,1.0108873934,-0.0317667609   | H,0,-1.104827554,-0.4813610841,3.9047790477  |
| C,0,1.7287107996,1.8754332325,-0.2061025862   |                                              |
